# Supplementary material for: Genetic dissection of metabolite variation in Arabidopsis seeds: evidence for mQTL hotspots and a master regulatory locus of seed metabolism
Source: PubMed Central journal article supplement (PMC5444479; doi:10.1093/jxb/erx049), 2017-03-06

# Subpopulation

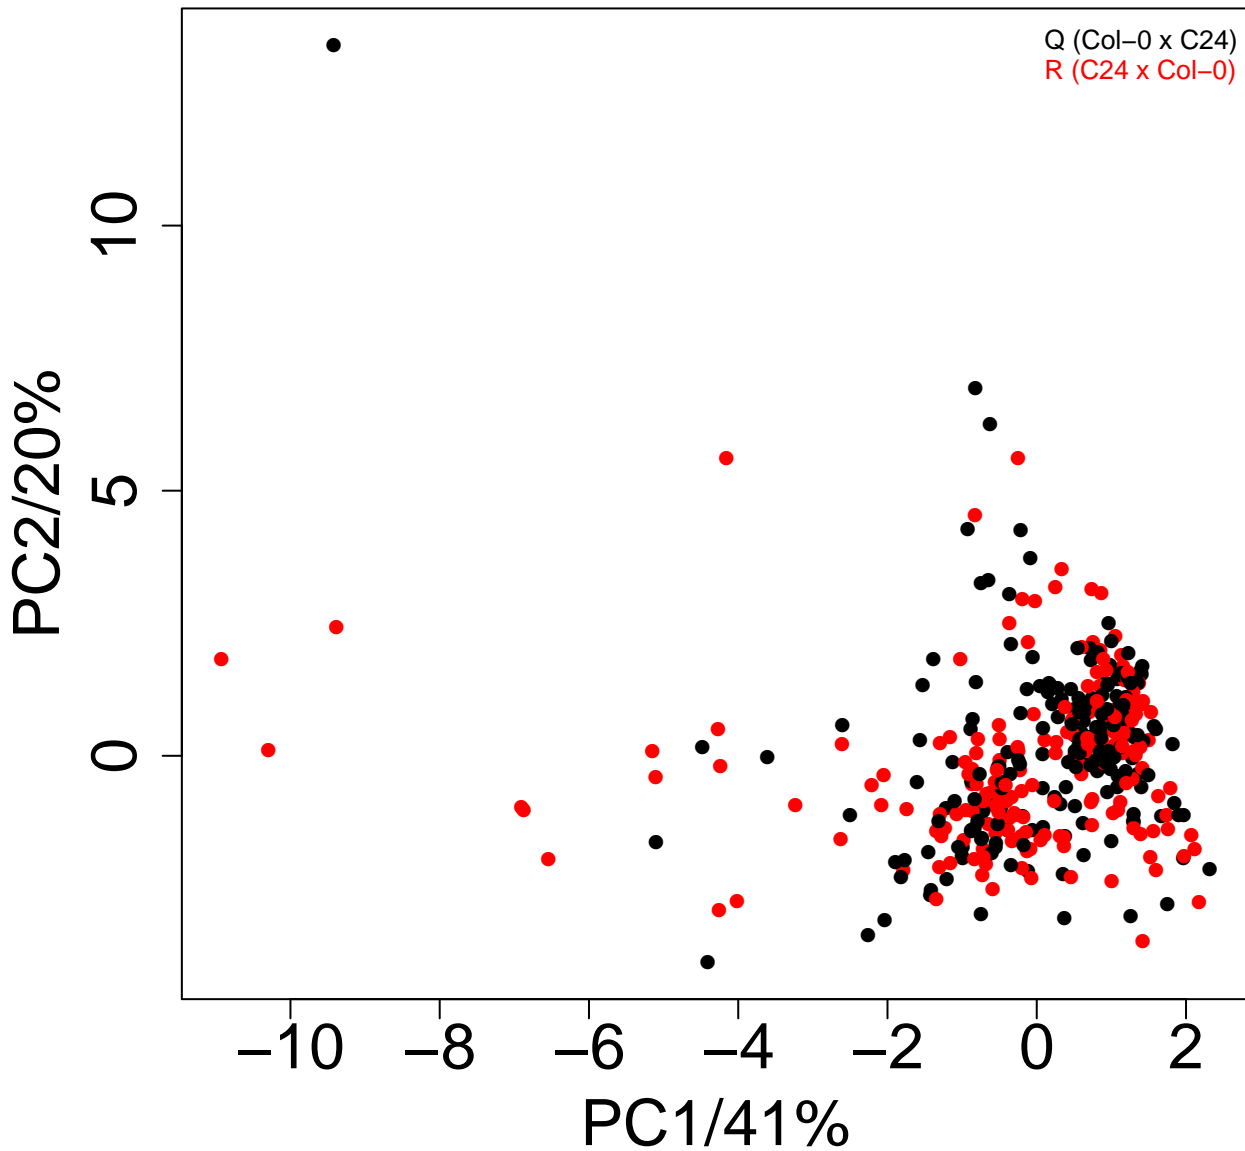

# Extraction

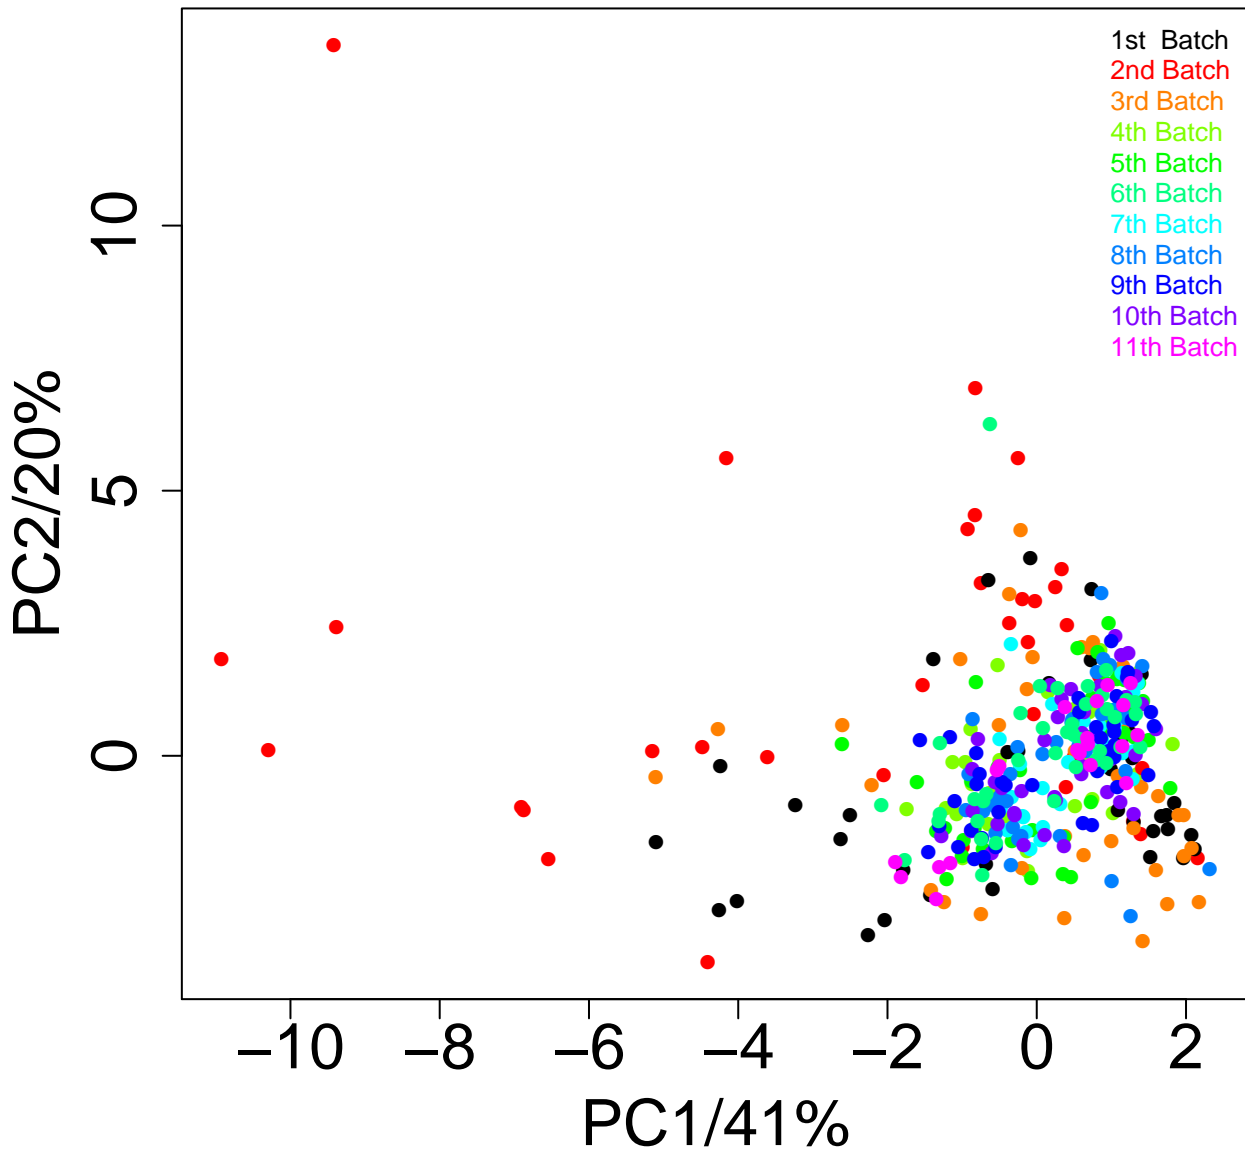

# Measurement

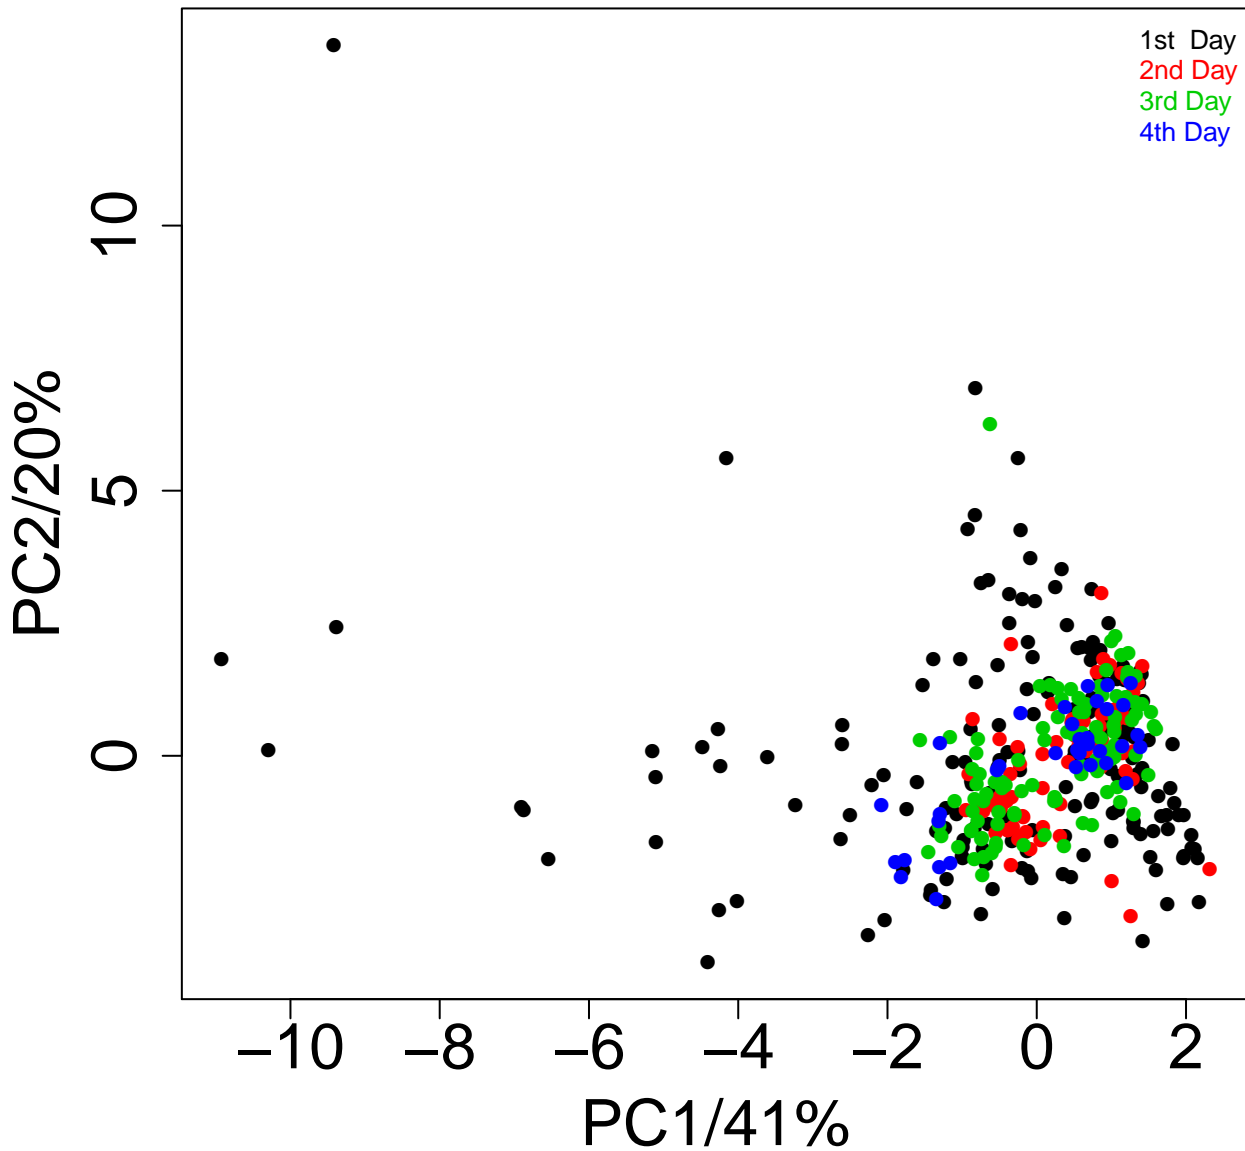

# Experiment

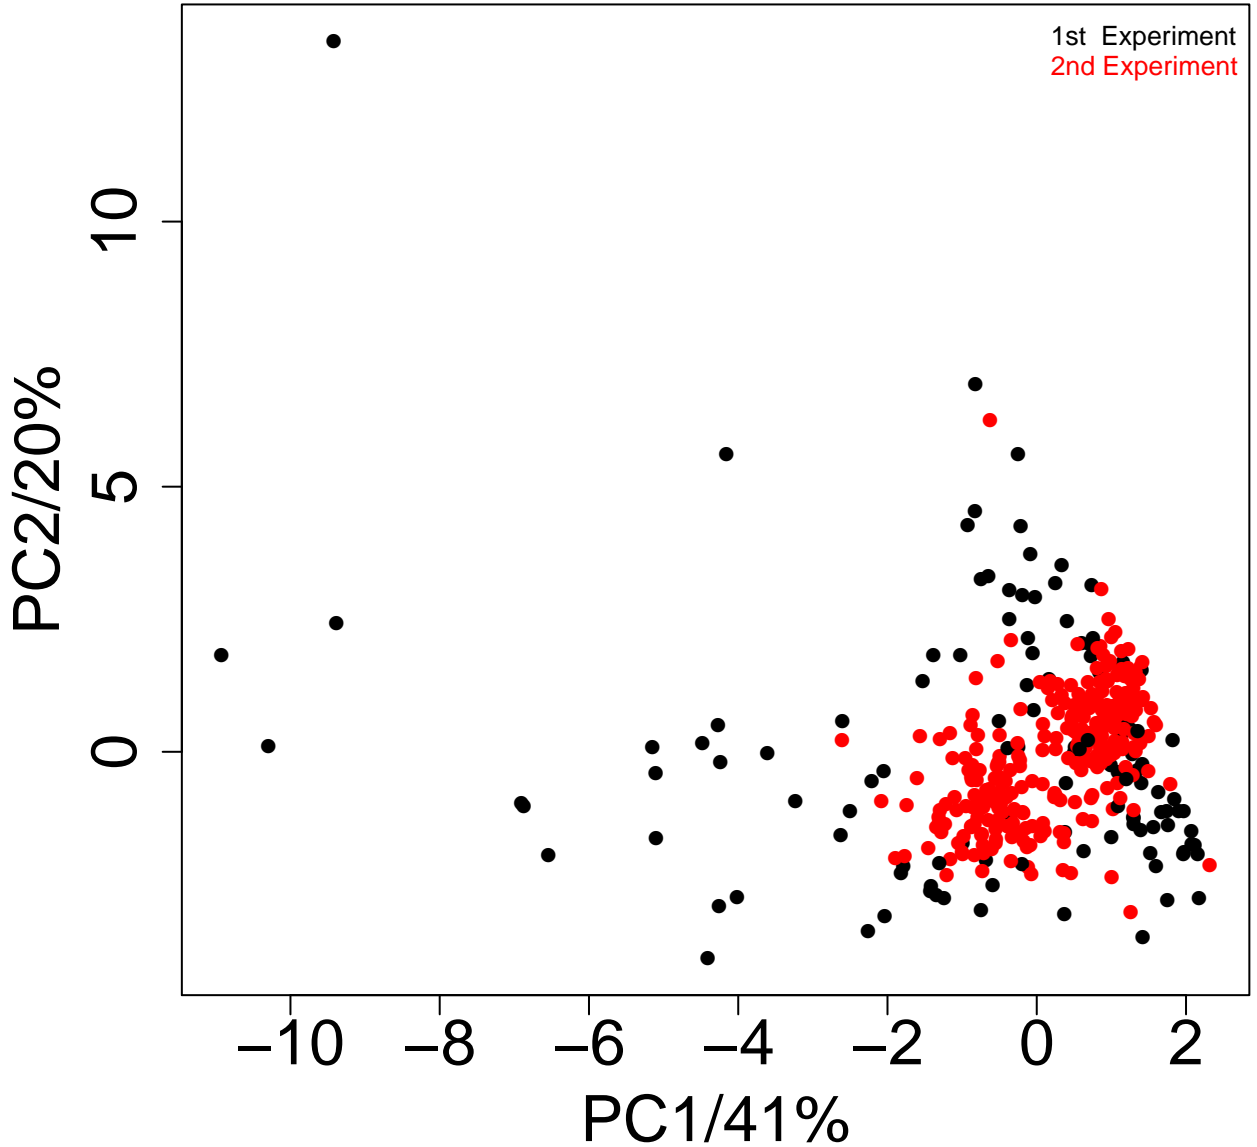

Chr. 1 Pos. 0 / MASC03771

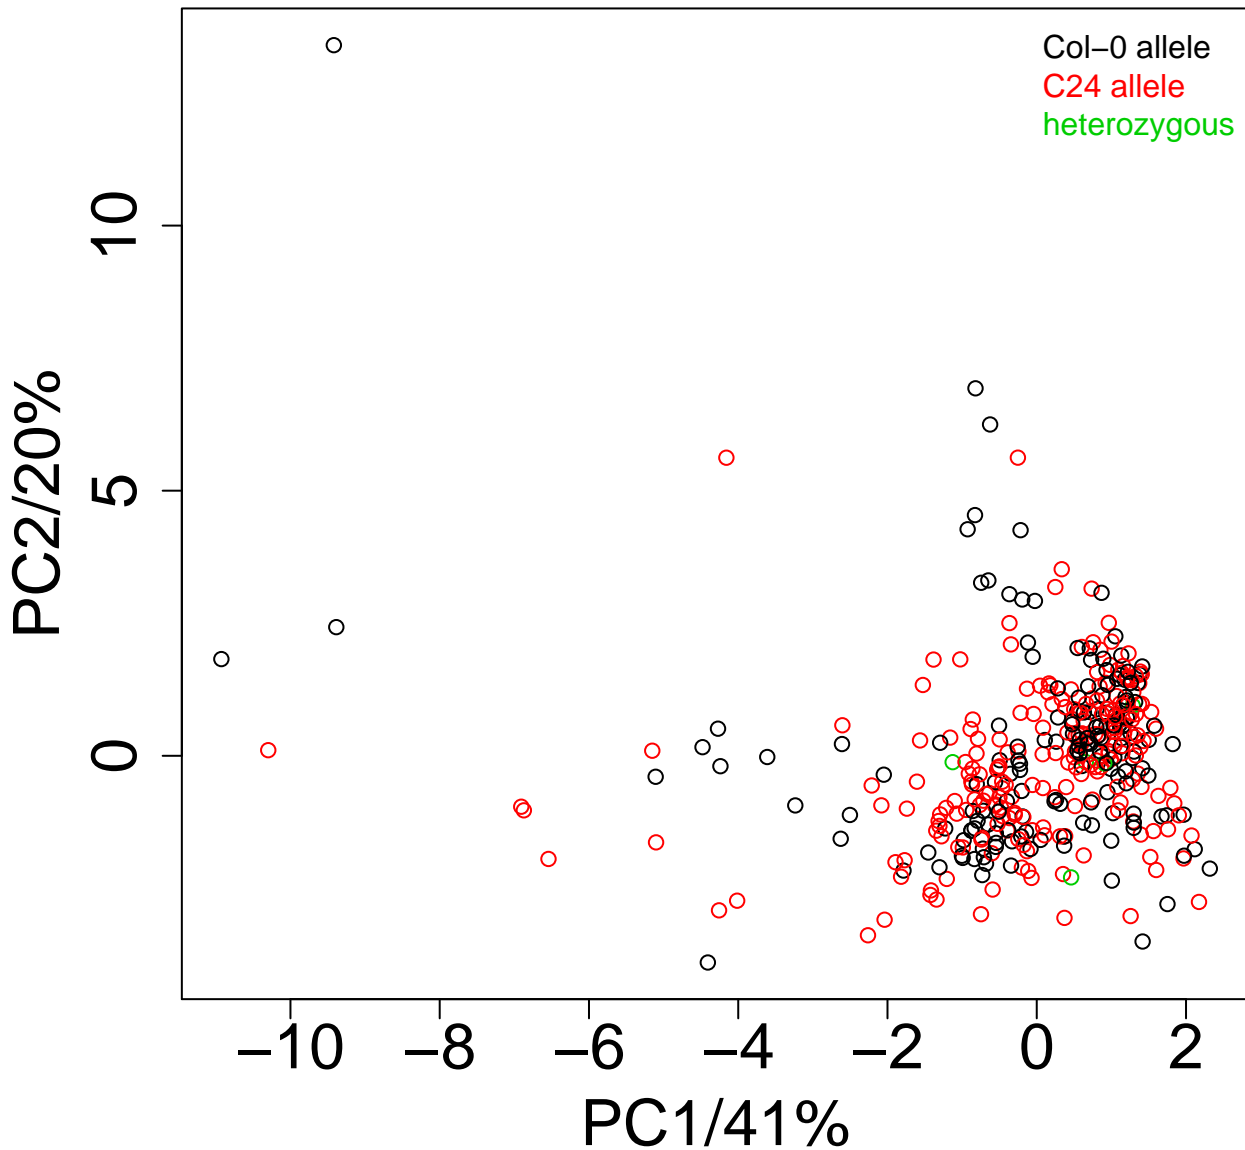

Chr. 1 Pos. 3.9 / F19P19ID

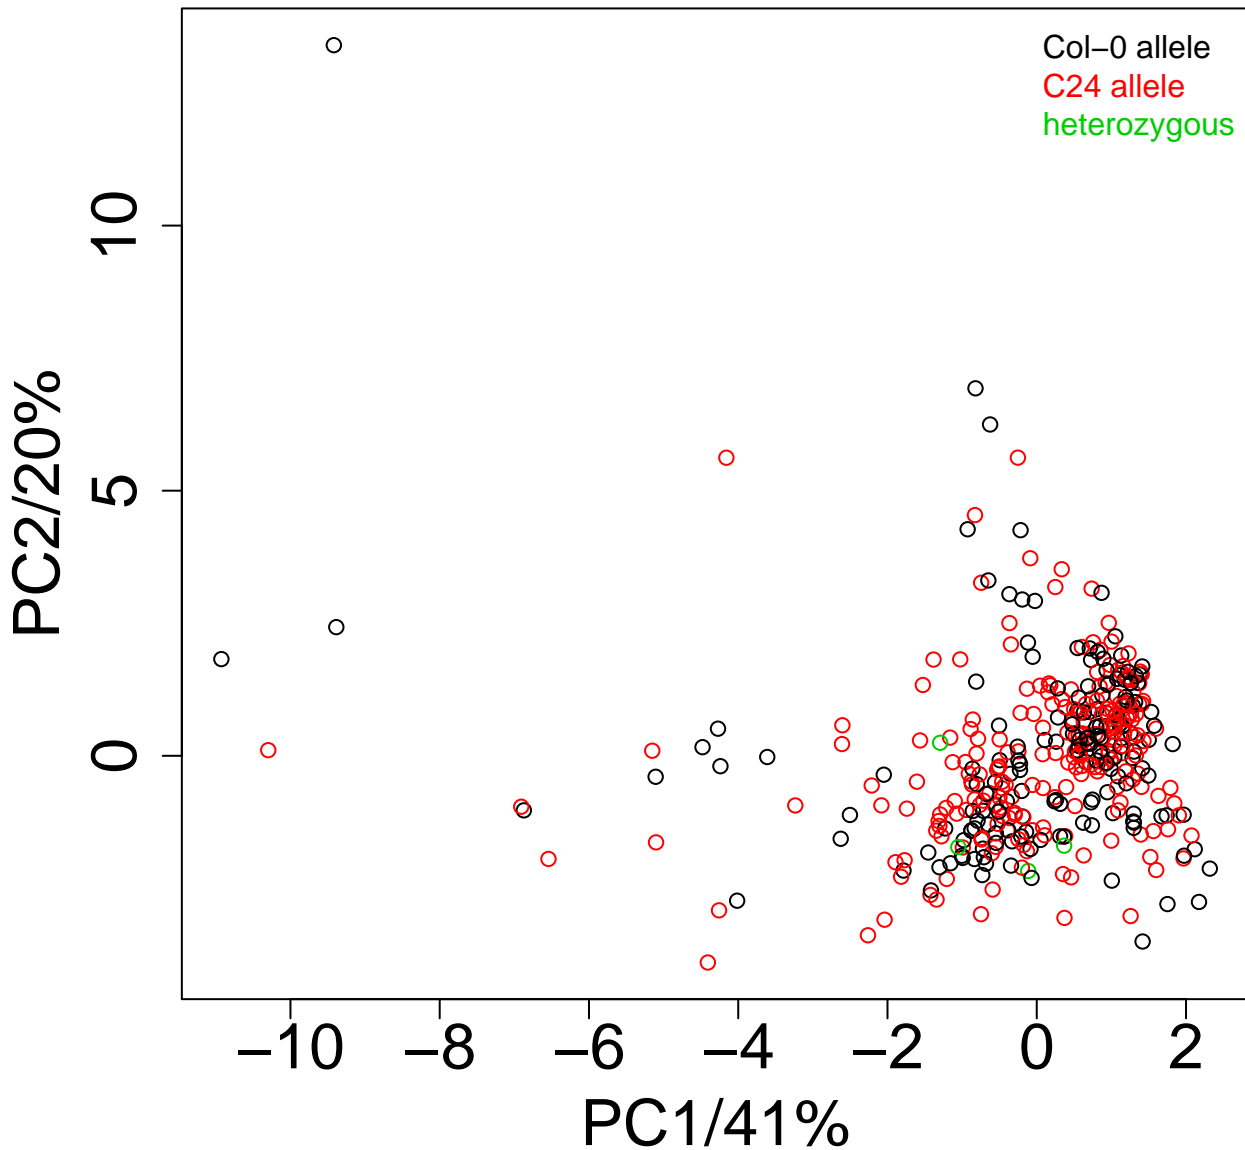

Chr. 1 Pos. 6.4 / F12K11ID

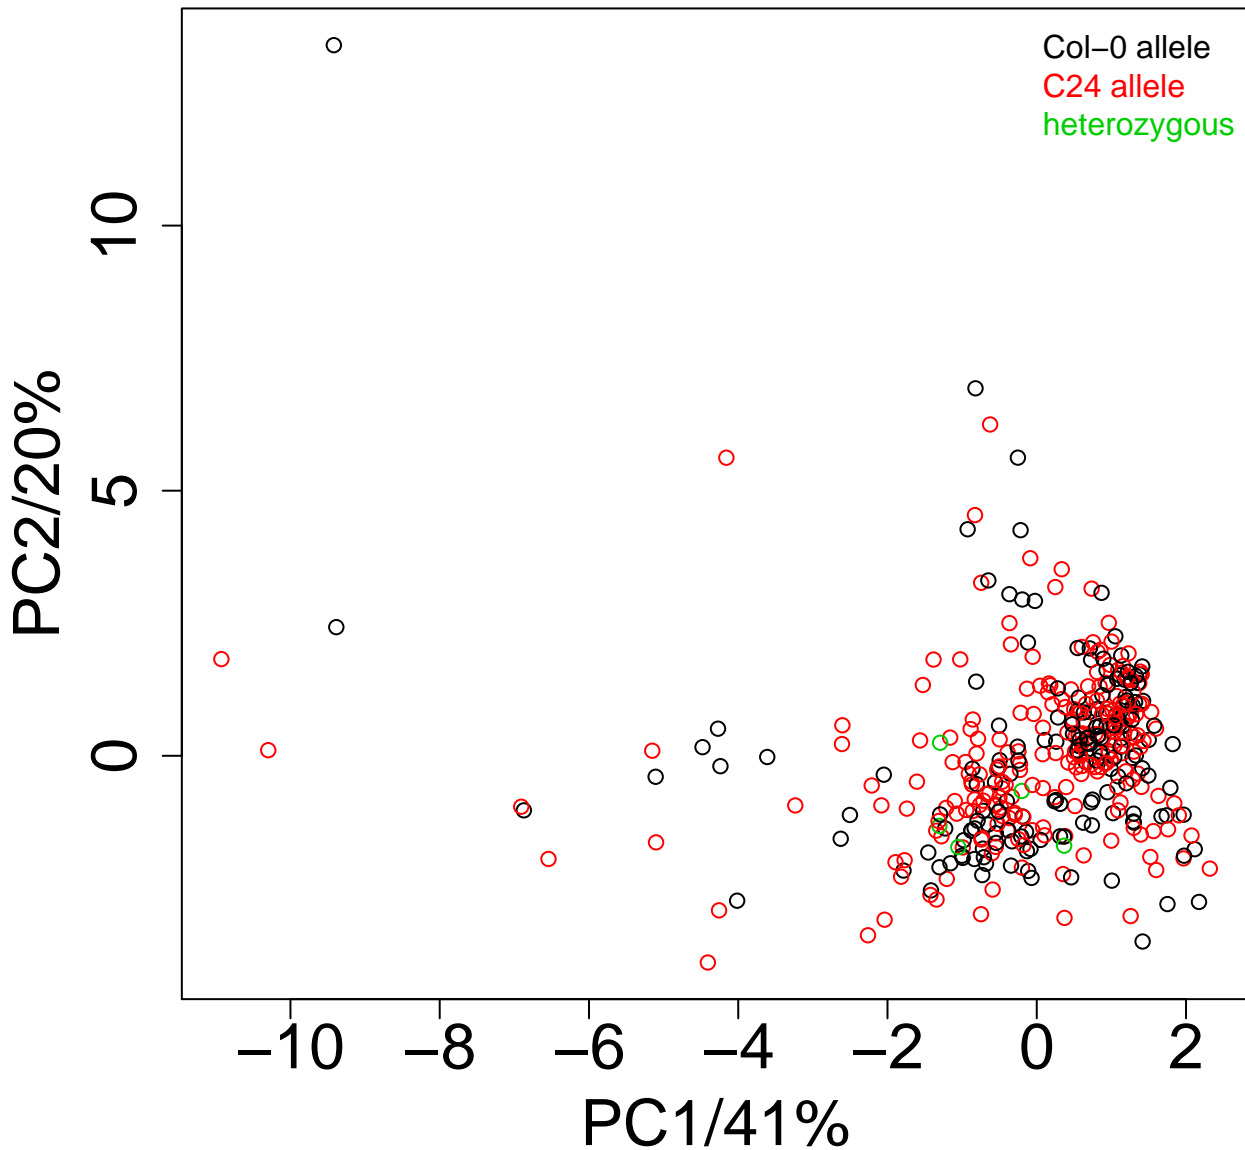

Chr. 1 Pos. 7.5 / MASC03758

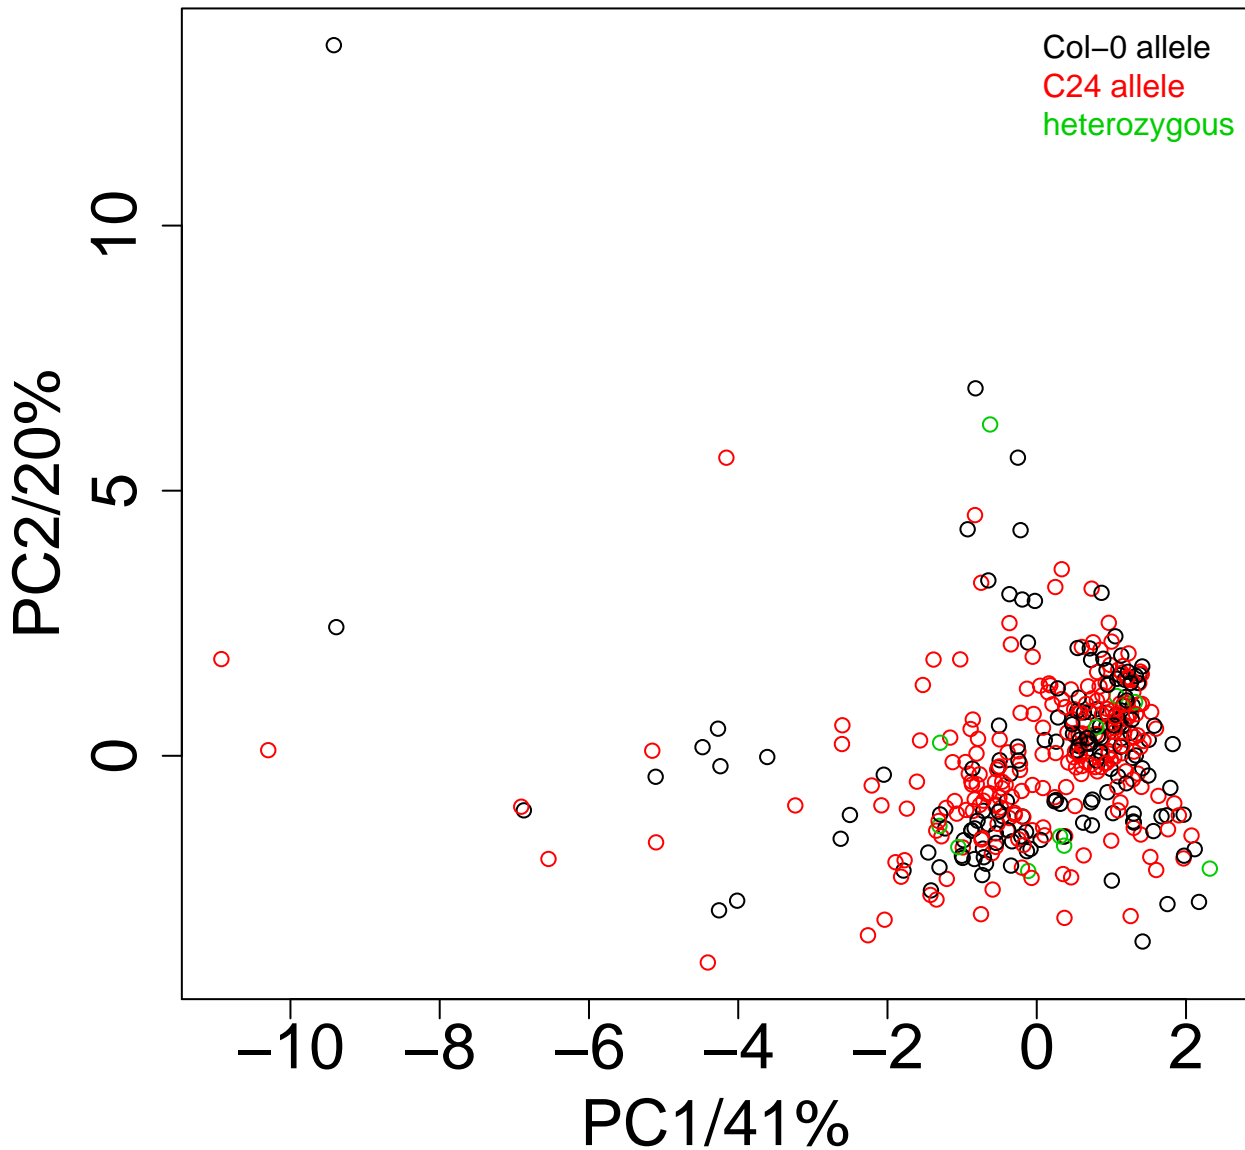



Chr. 1 Pos. 10.8 / MASC09203

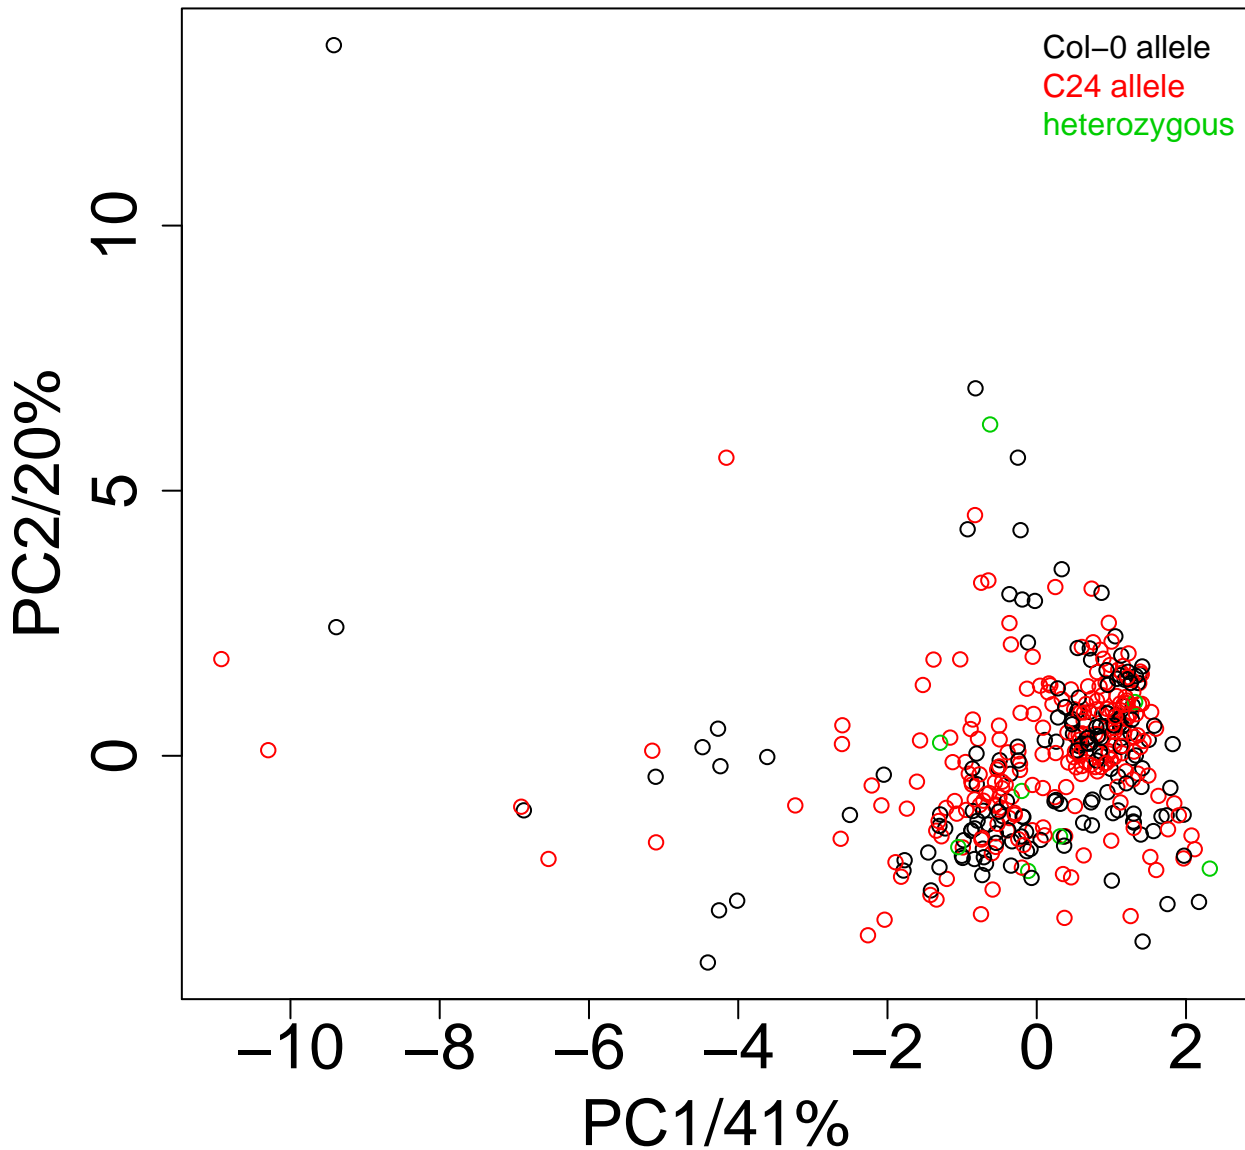

Chr. 1 Pos. 14.1 / MASC02475

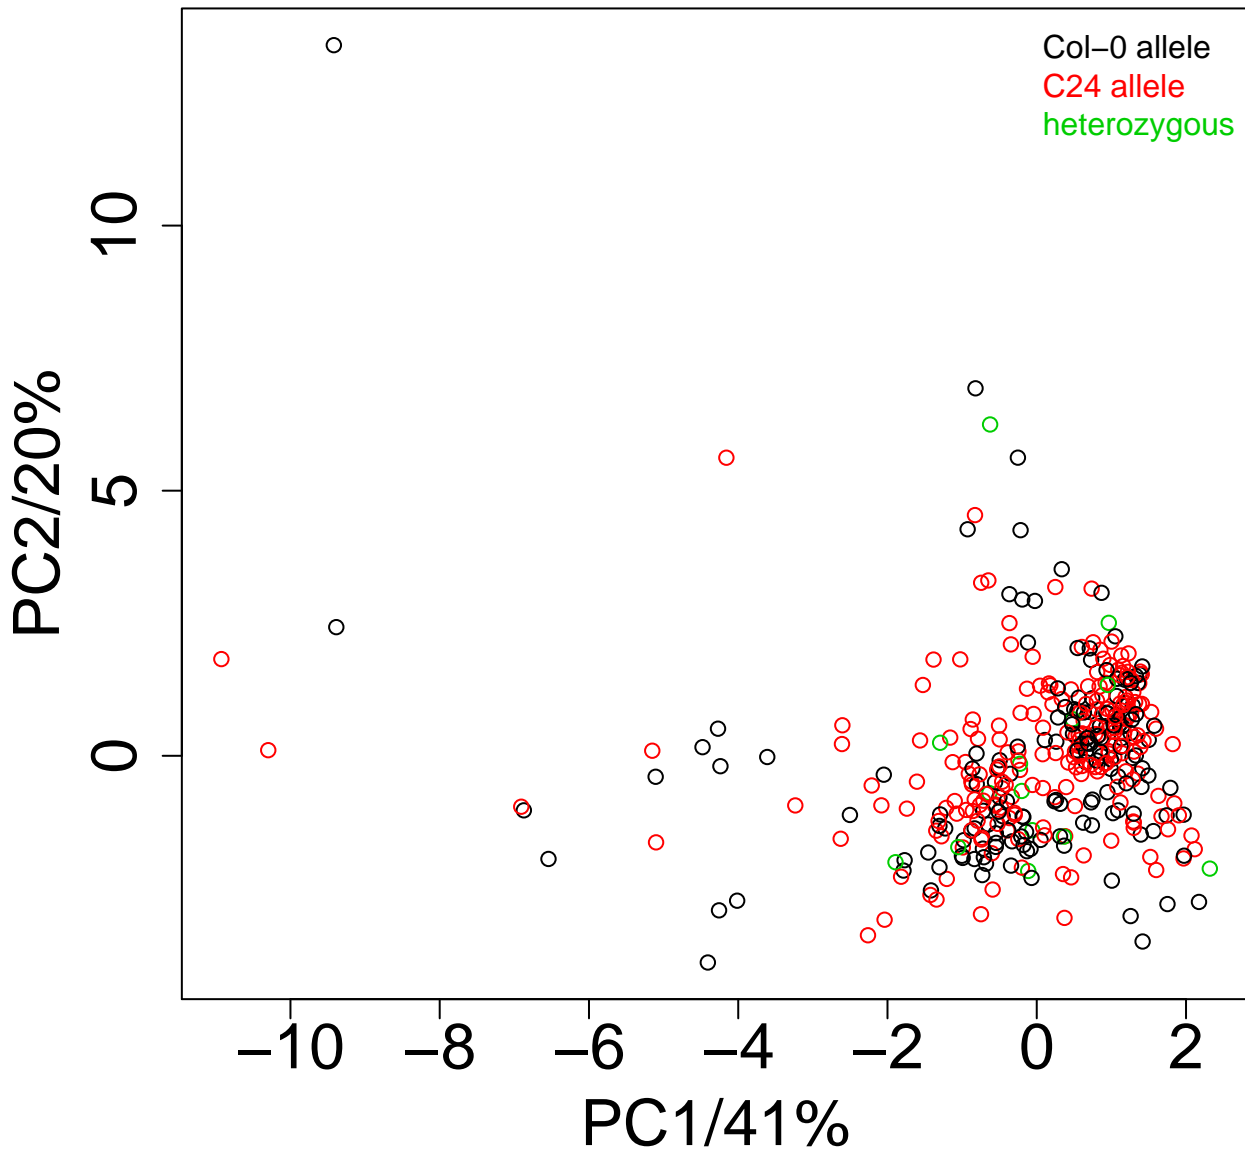

Chr. 1 Pos. 17.5 / MASC03658

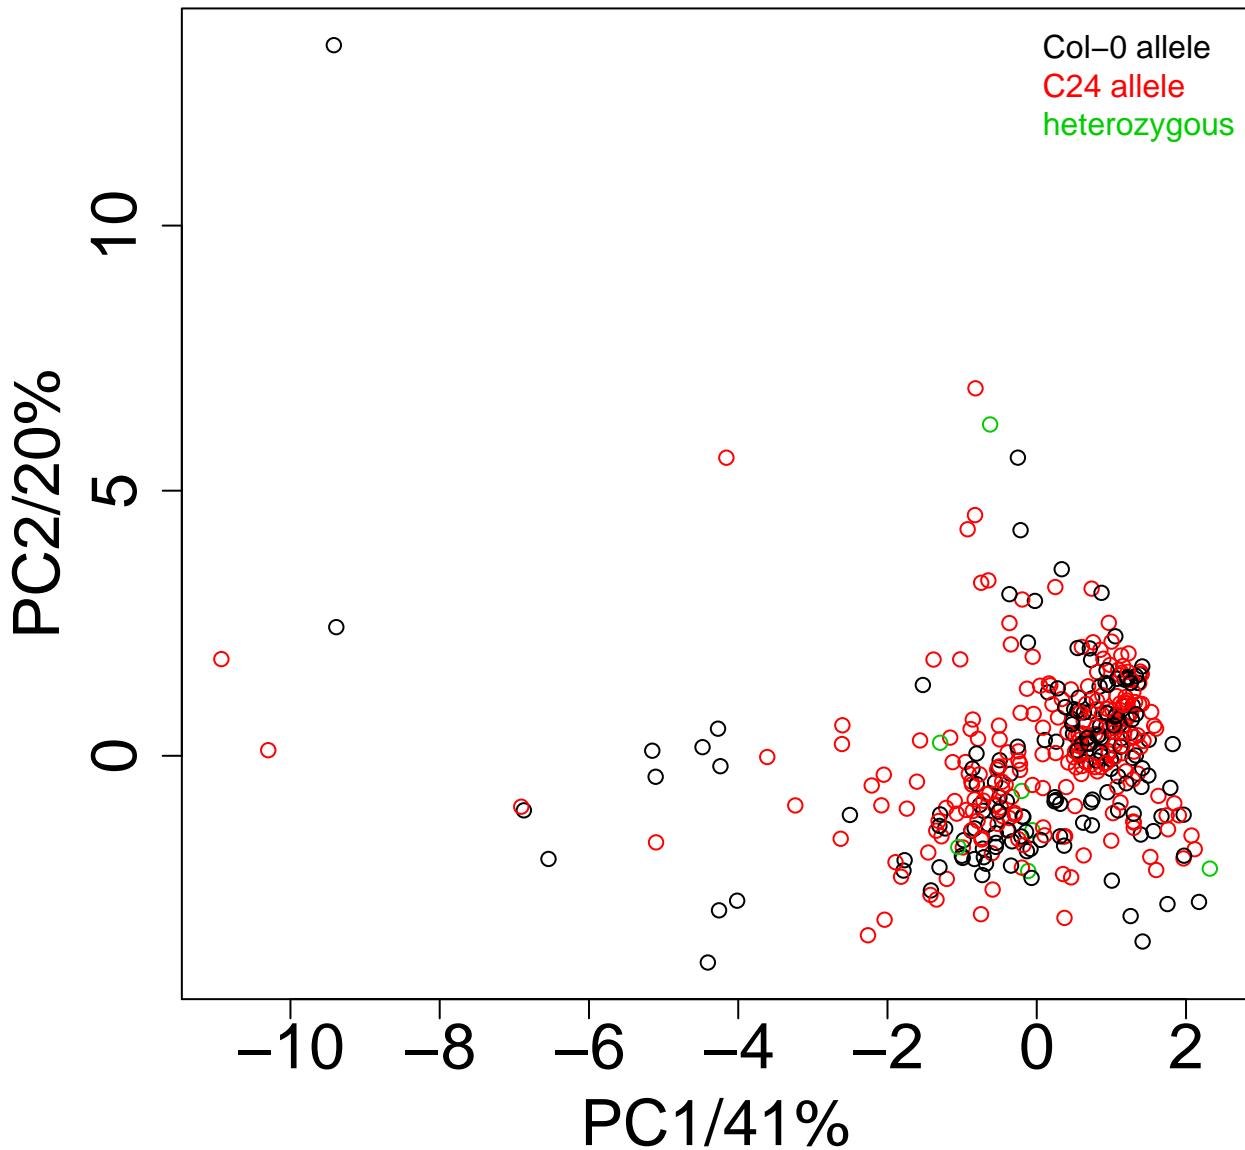

Chr. 1 Pos. 19.1 / MASC03911

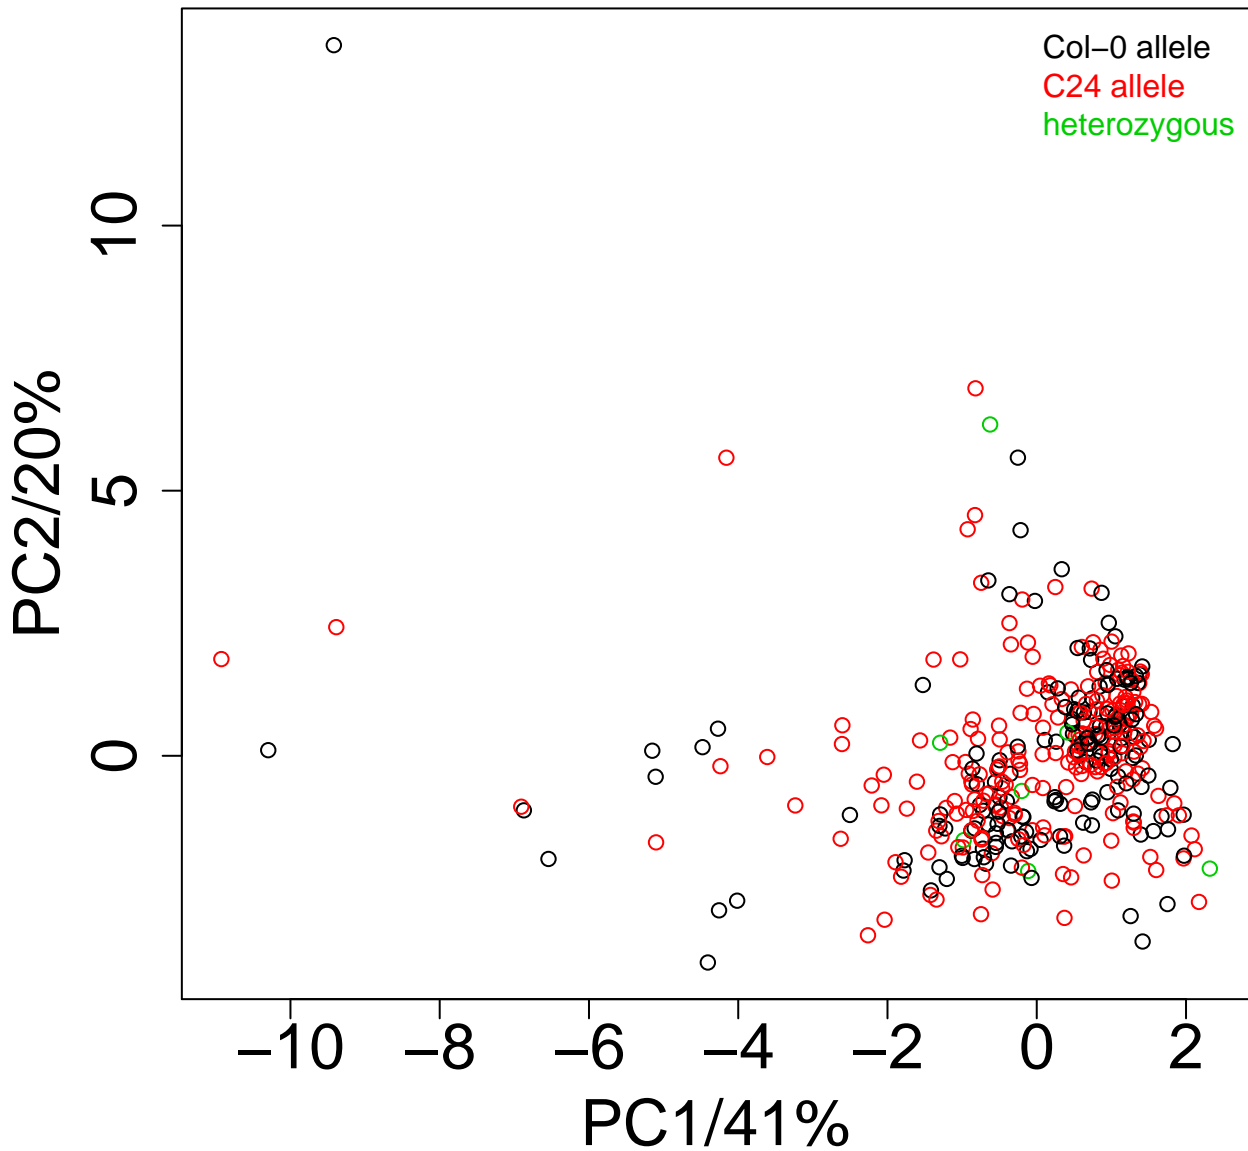

Chr. 1 Pos. 22.8 / MASC05029

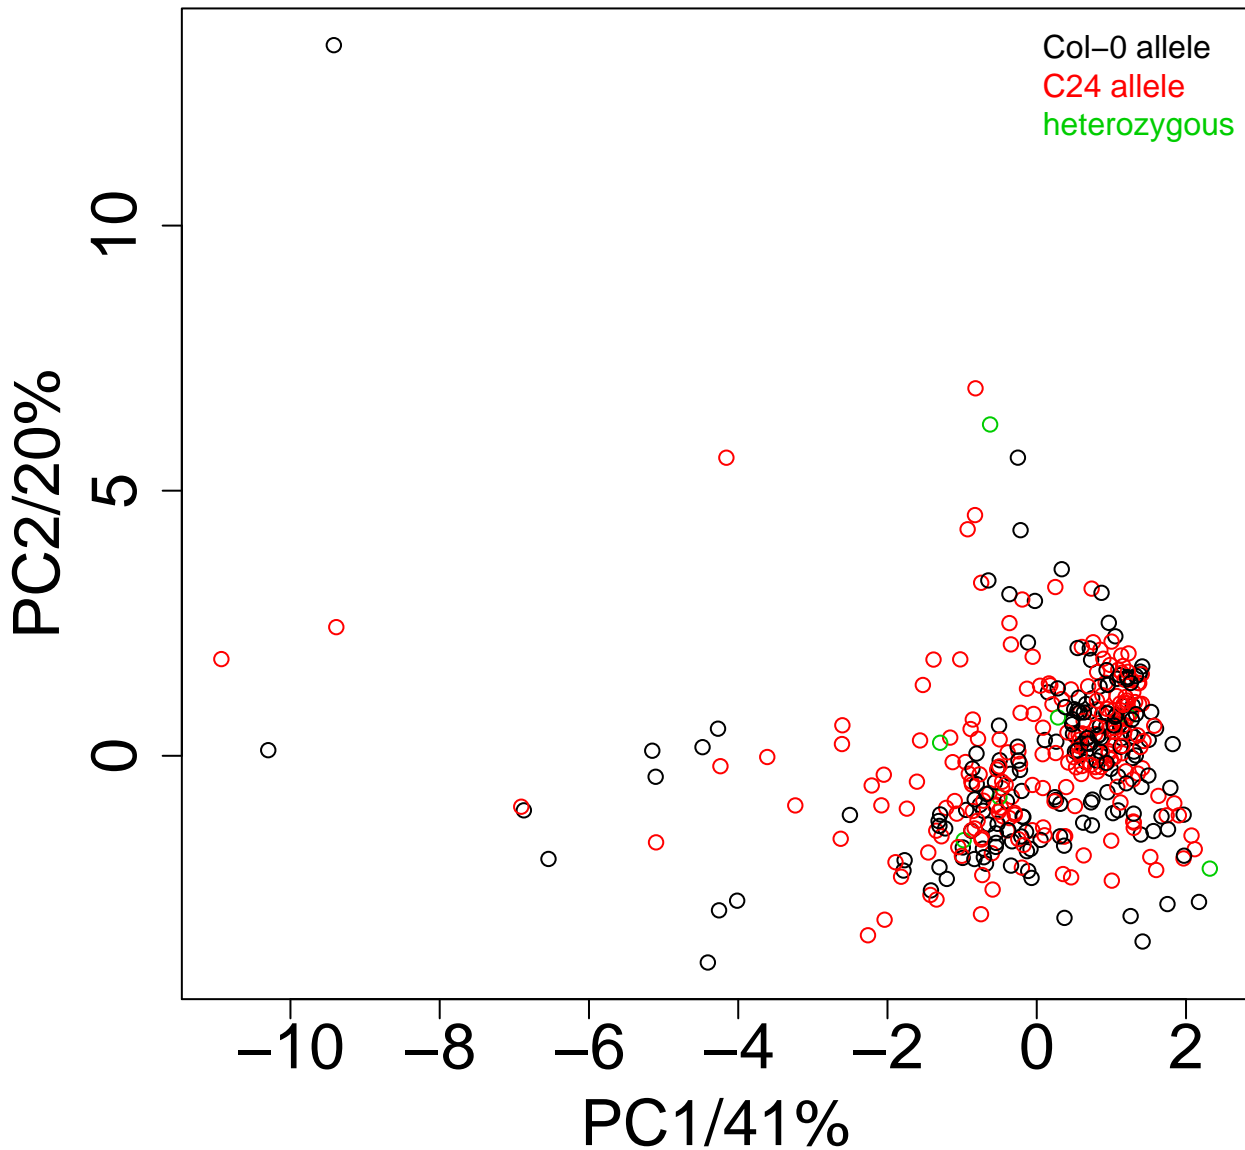

Chr. 1 Pos. 26.7 / MASC05303

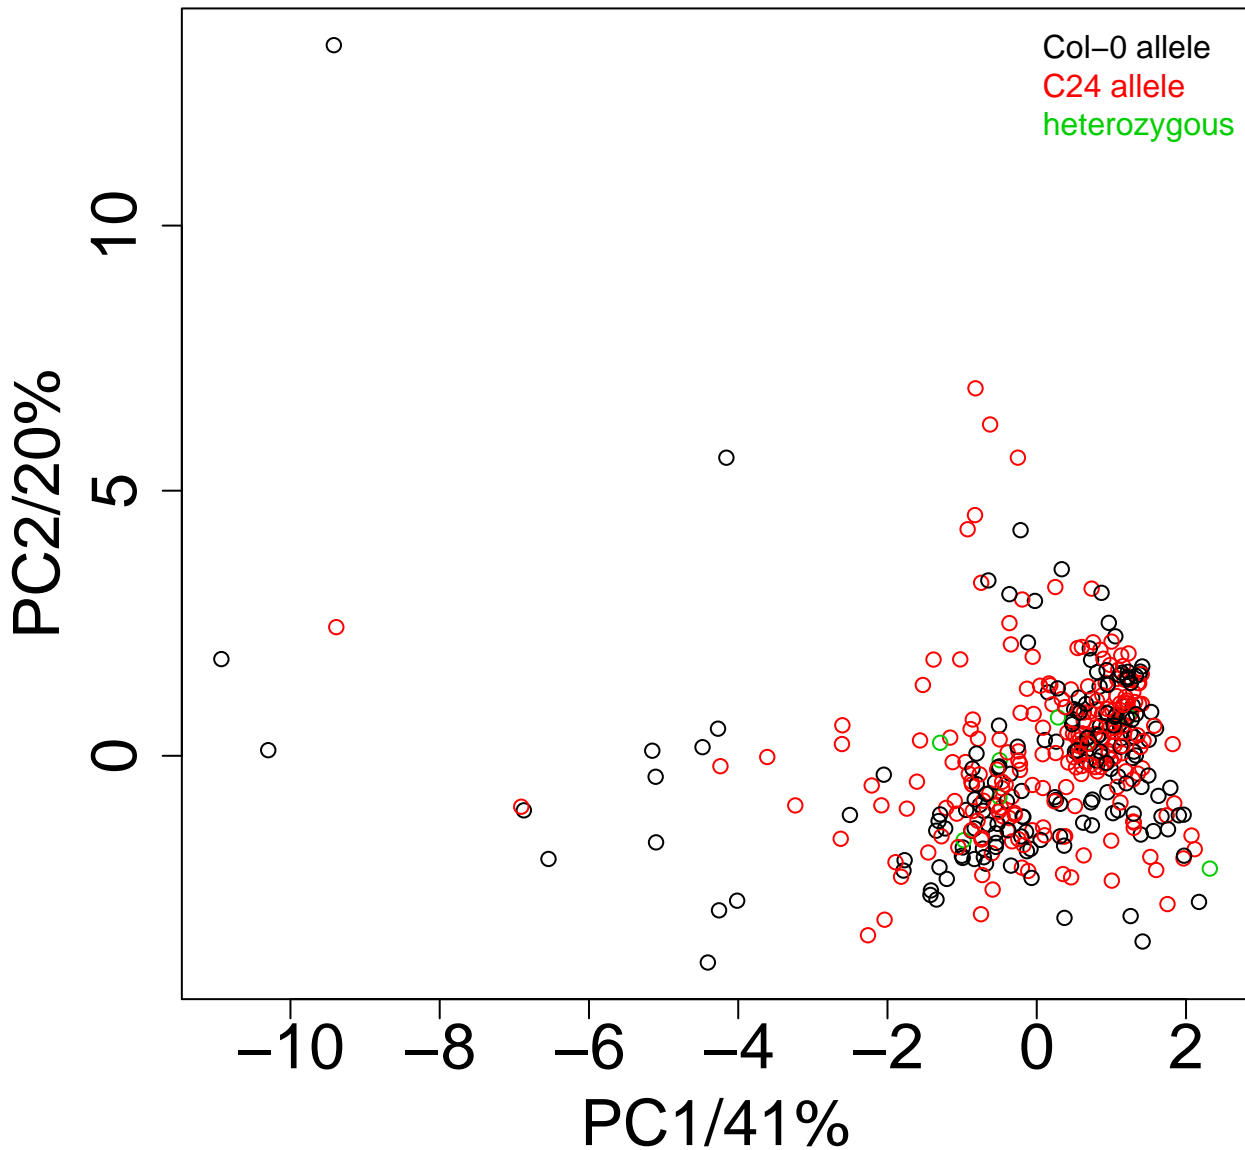

Chr. 1 Pos. 32.9 / MASC09223

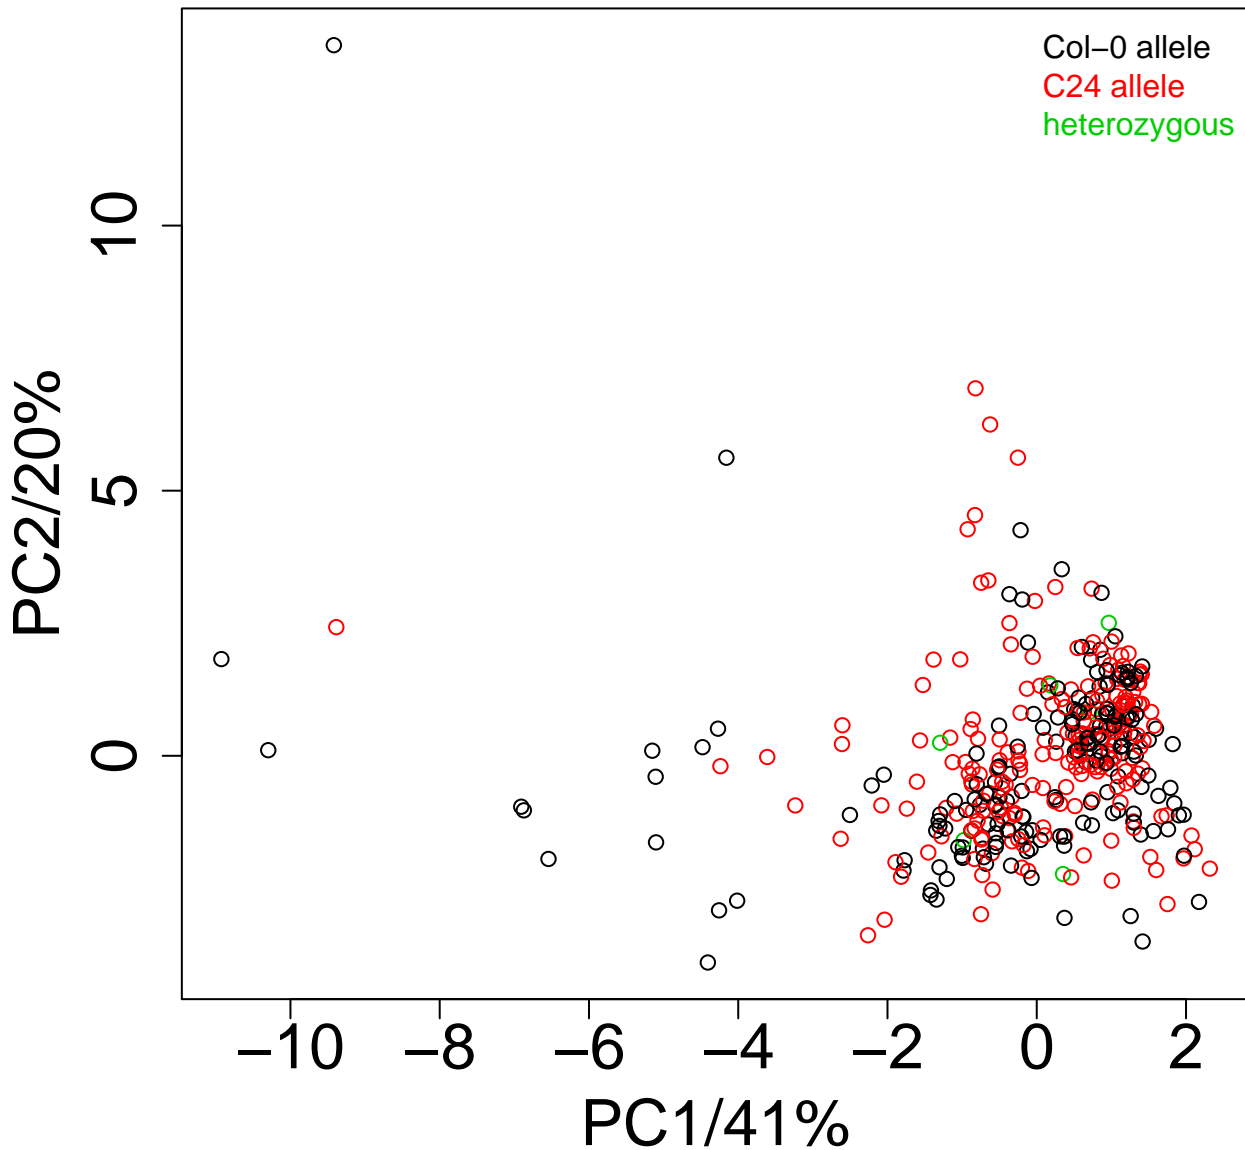

Chr. 1 Pos. 34.9 / MASC02998

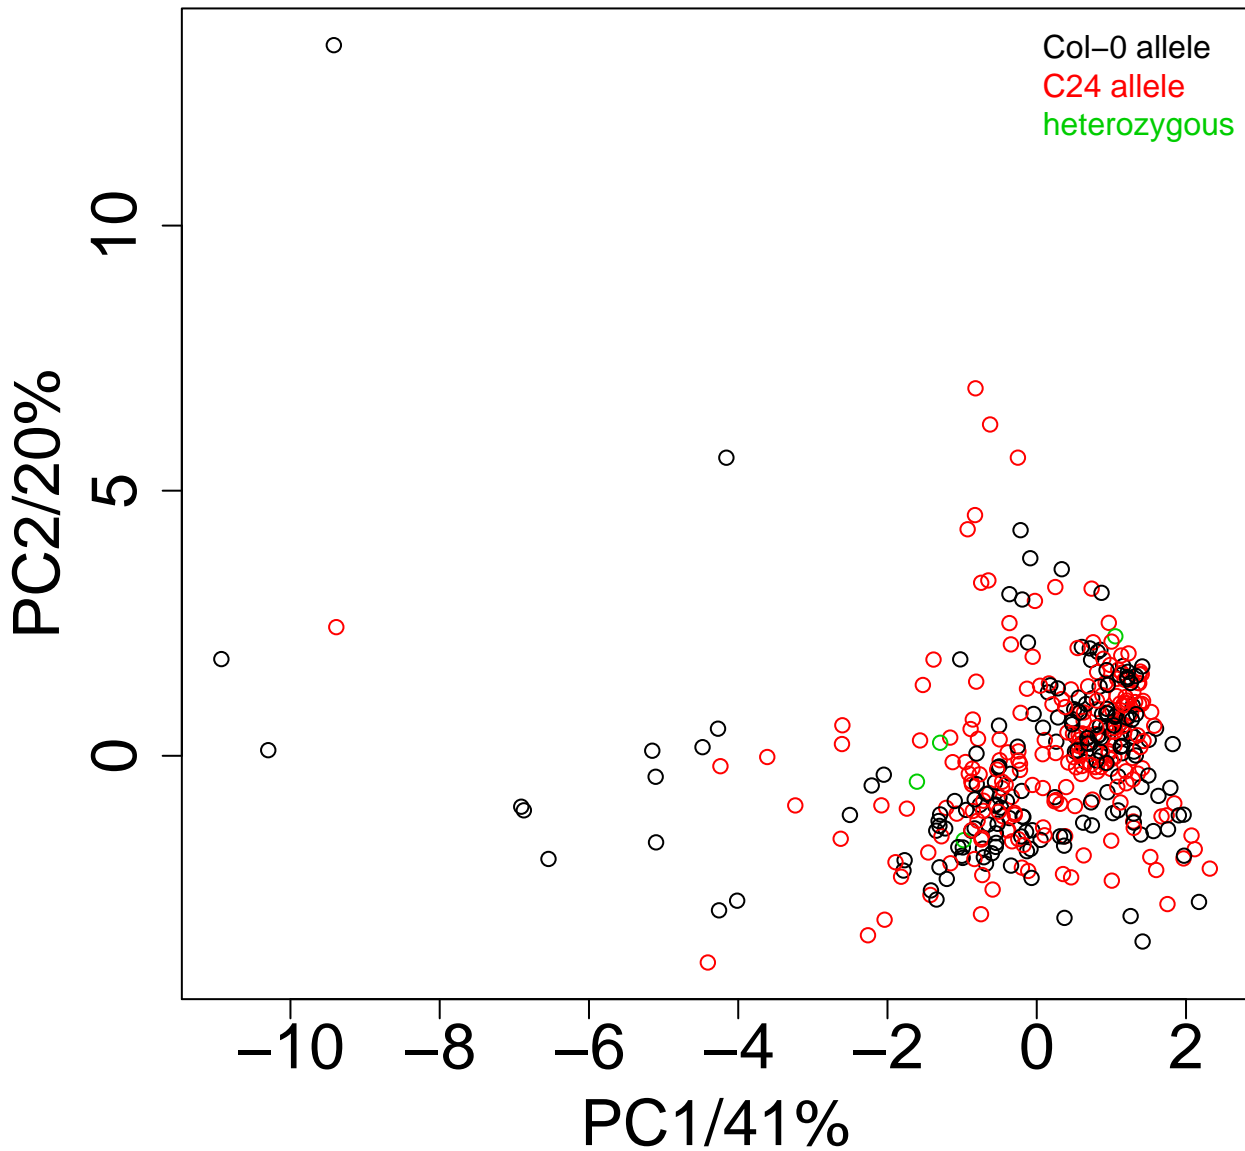



Chr. 1 Pos. 38.1 / MASC09204

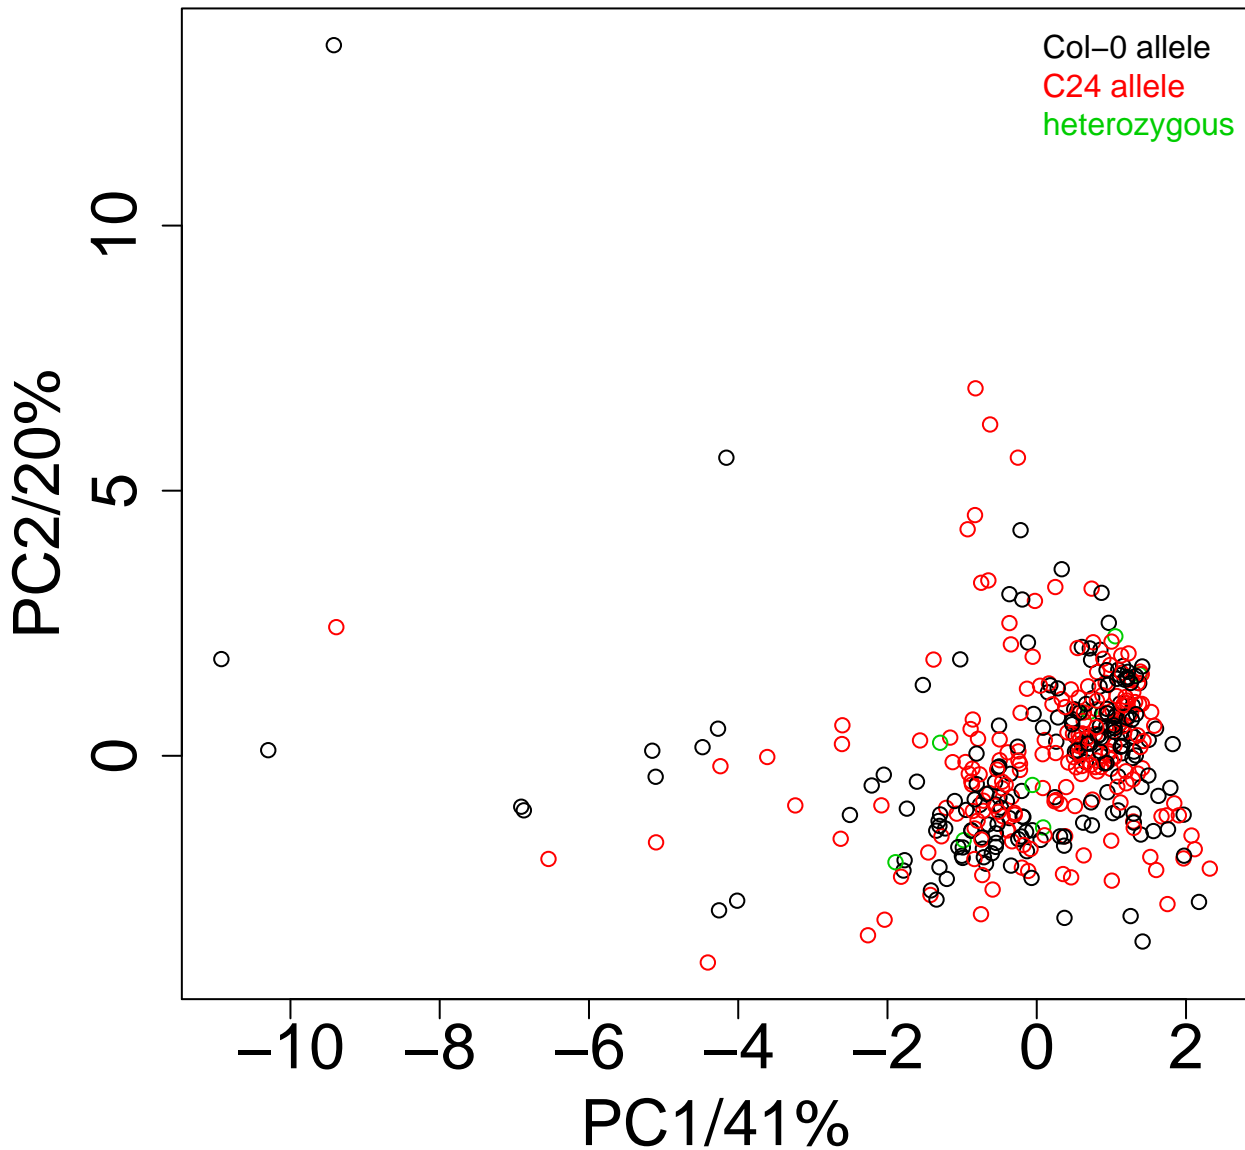

Chr. 1 Pos. 43 / MASC02577

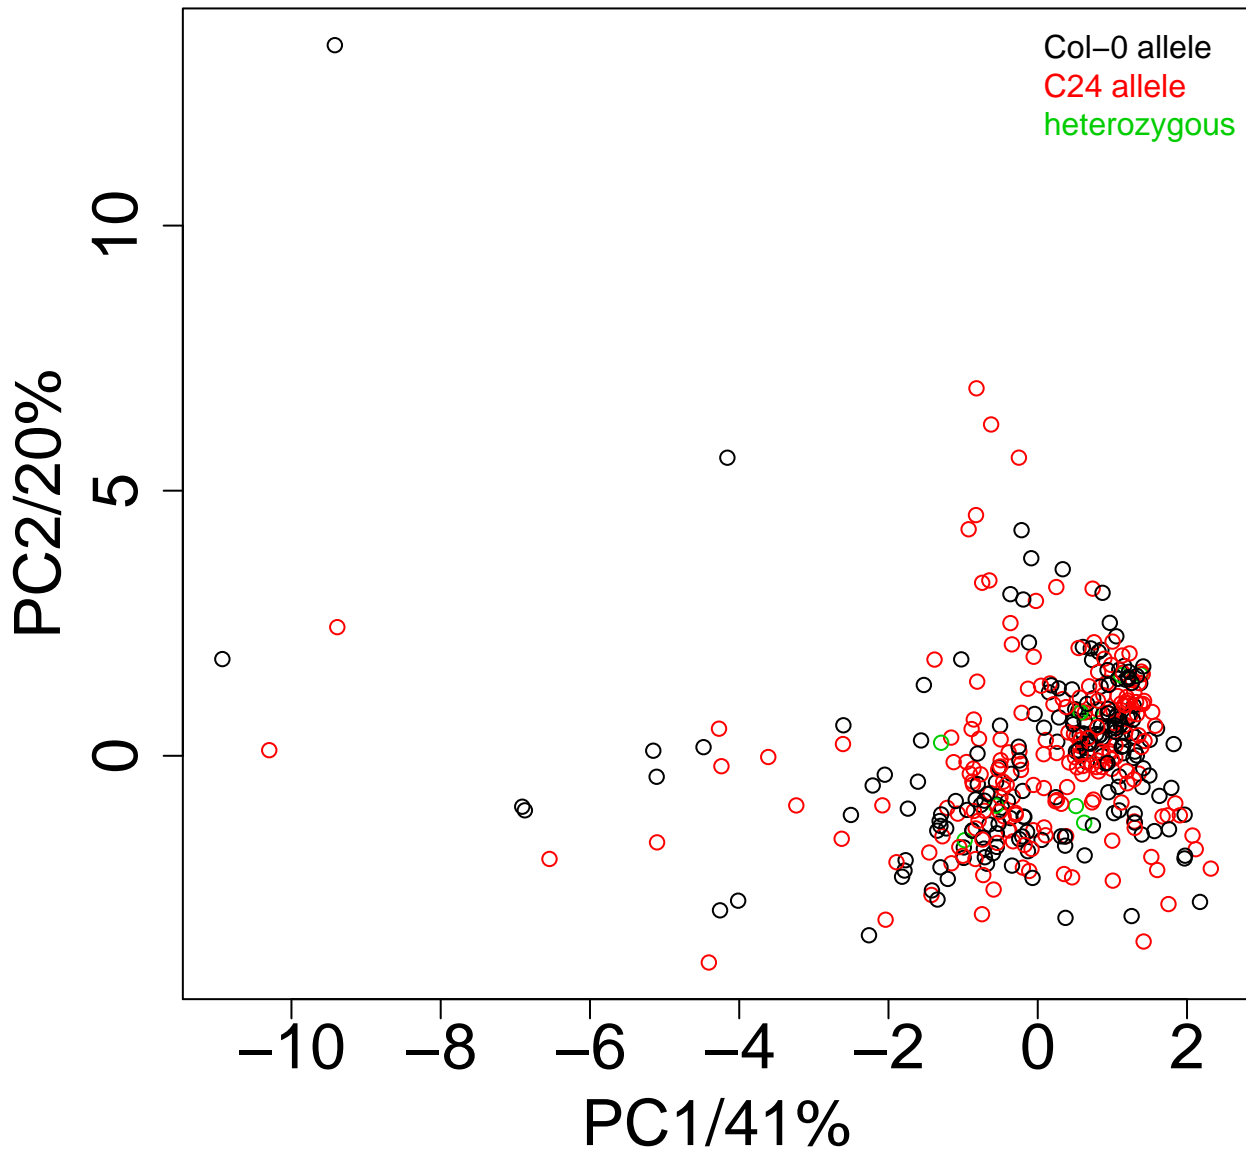

Chr. 1 Pos. 43.6 / MASC04127

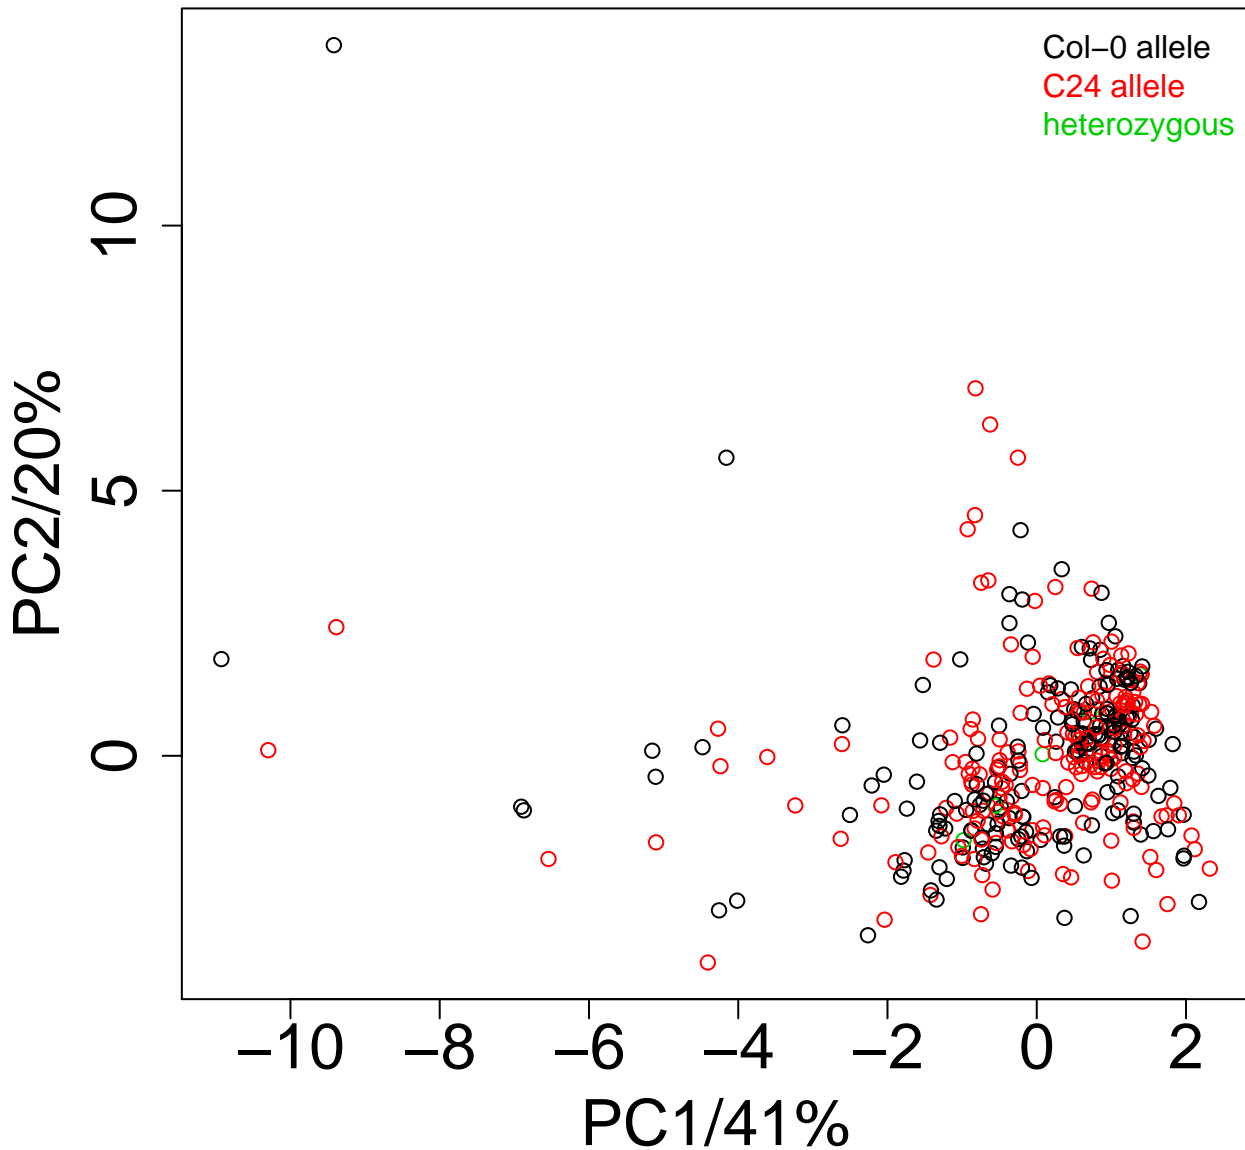

Chr. 1 Pos. 45.4 / MASC04209

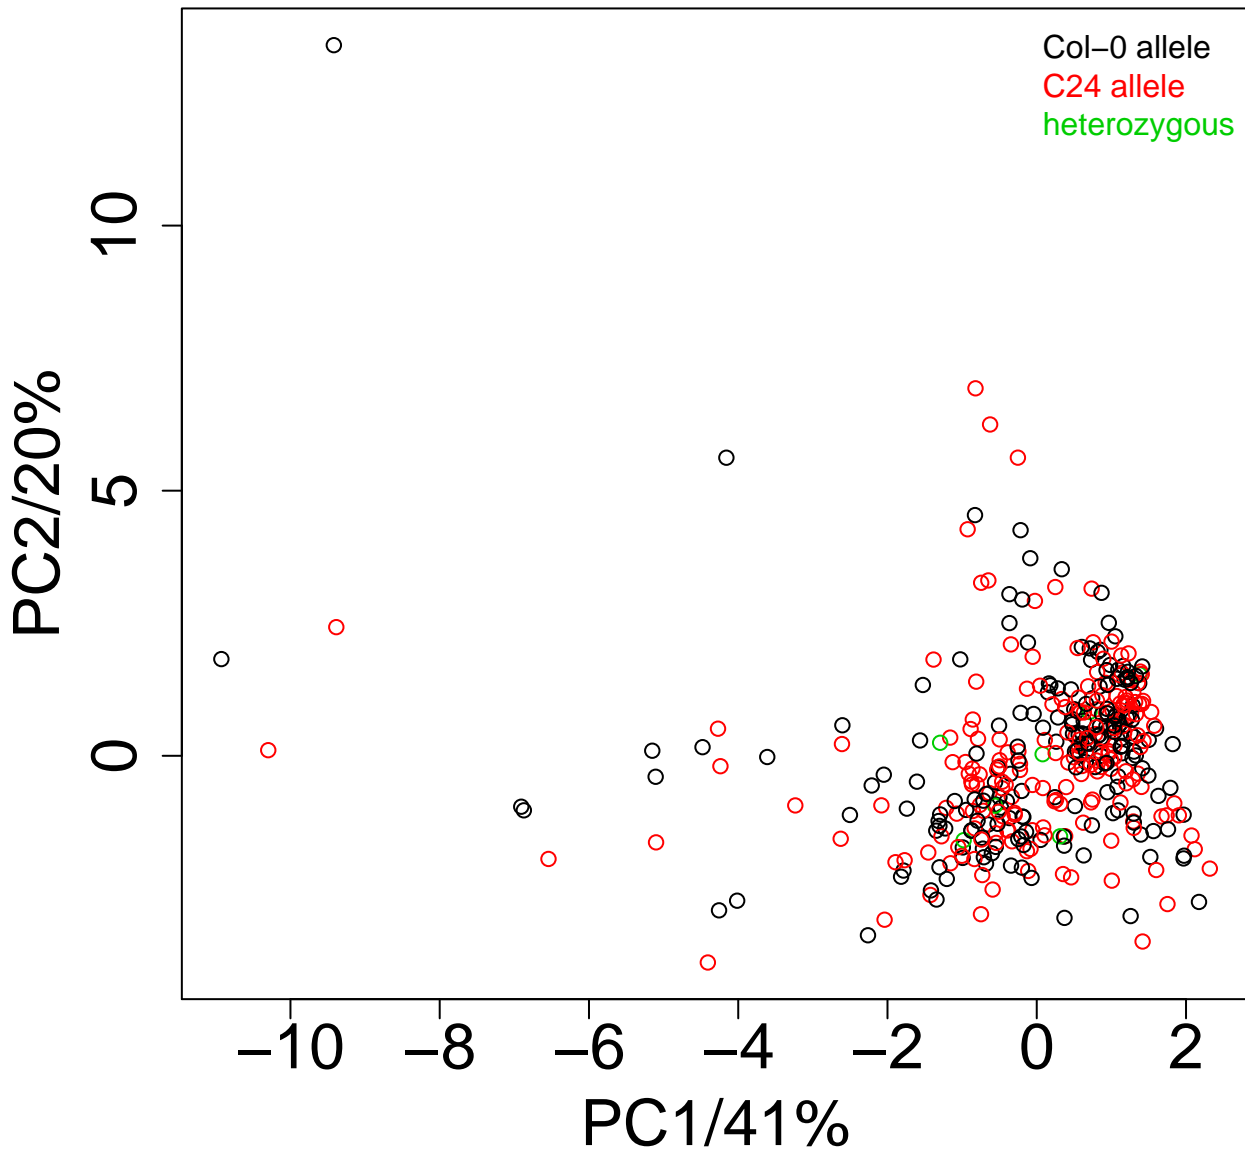

Chr. 1 Pos. 50.5 / MASC03340

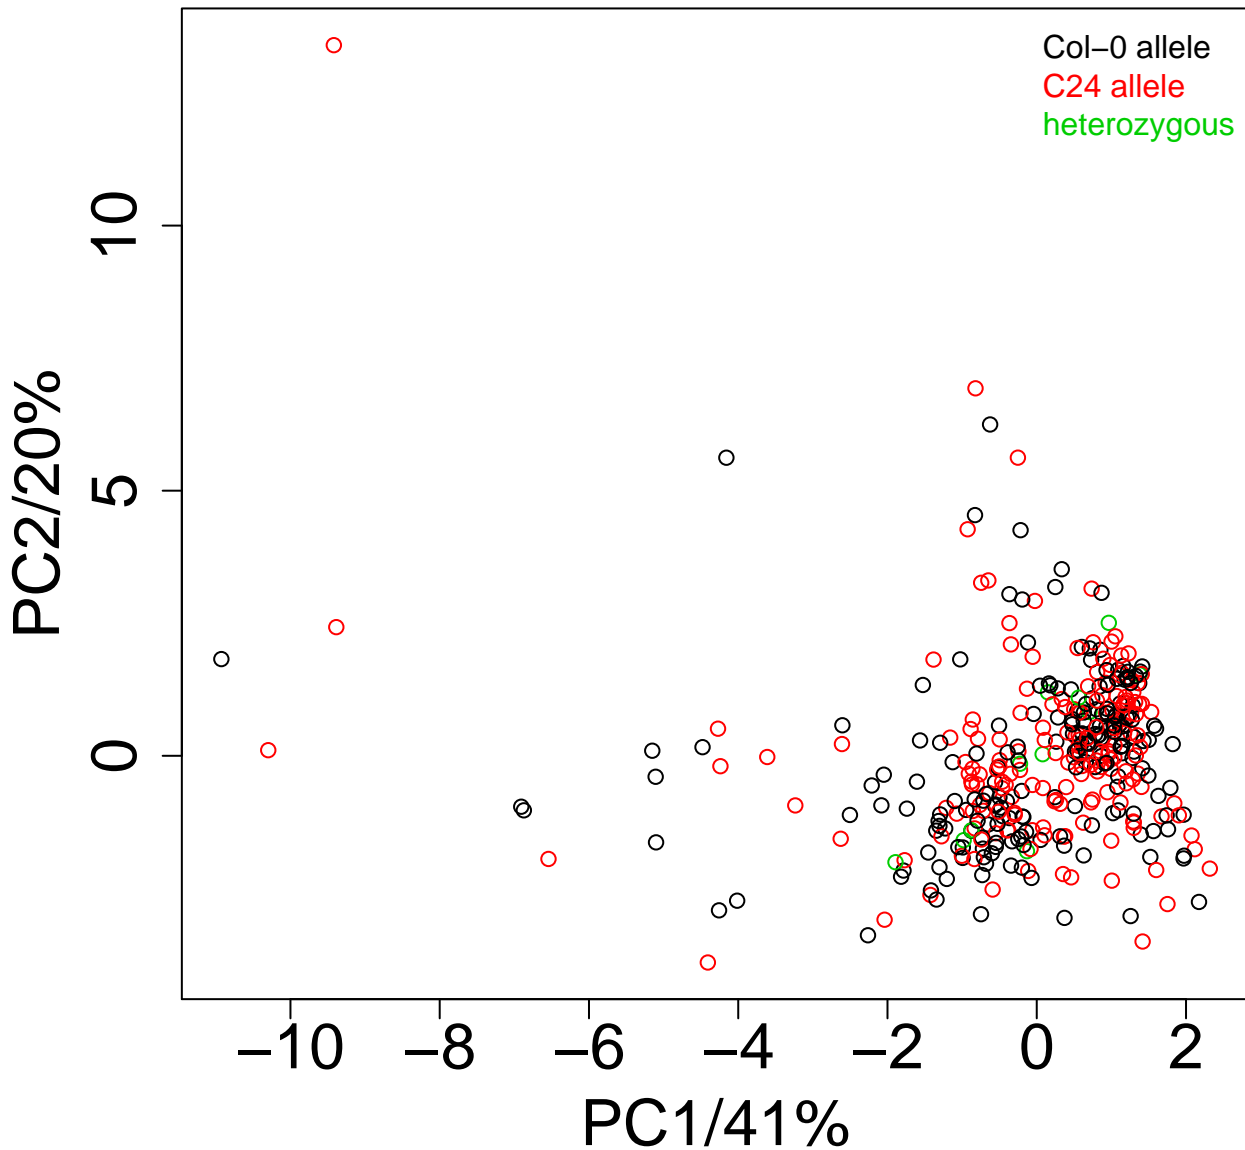

Chr. 1 Pos. 54.4 / MASC00545

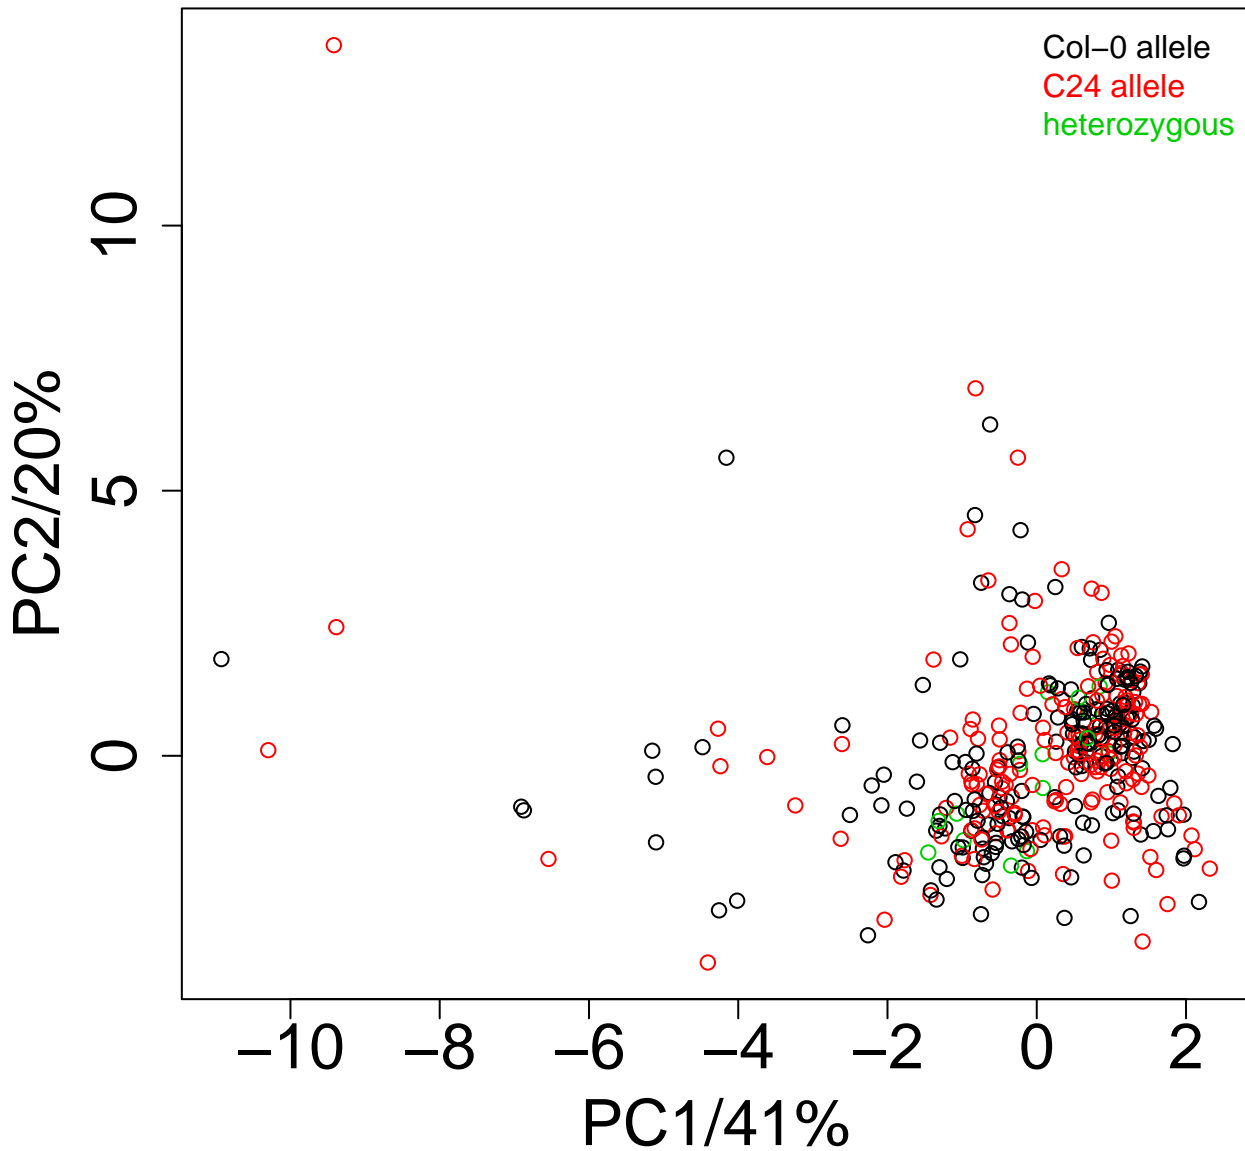

Chr. 1 Pos. 57.7 / MASC03754

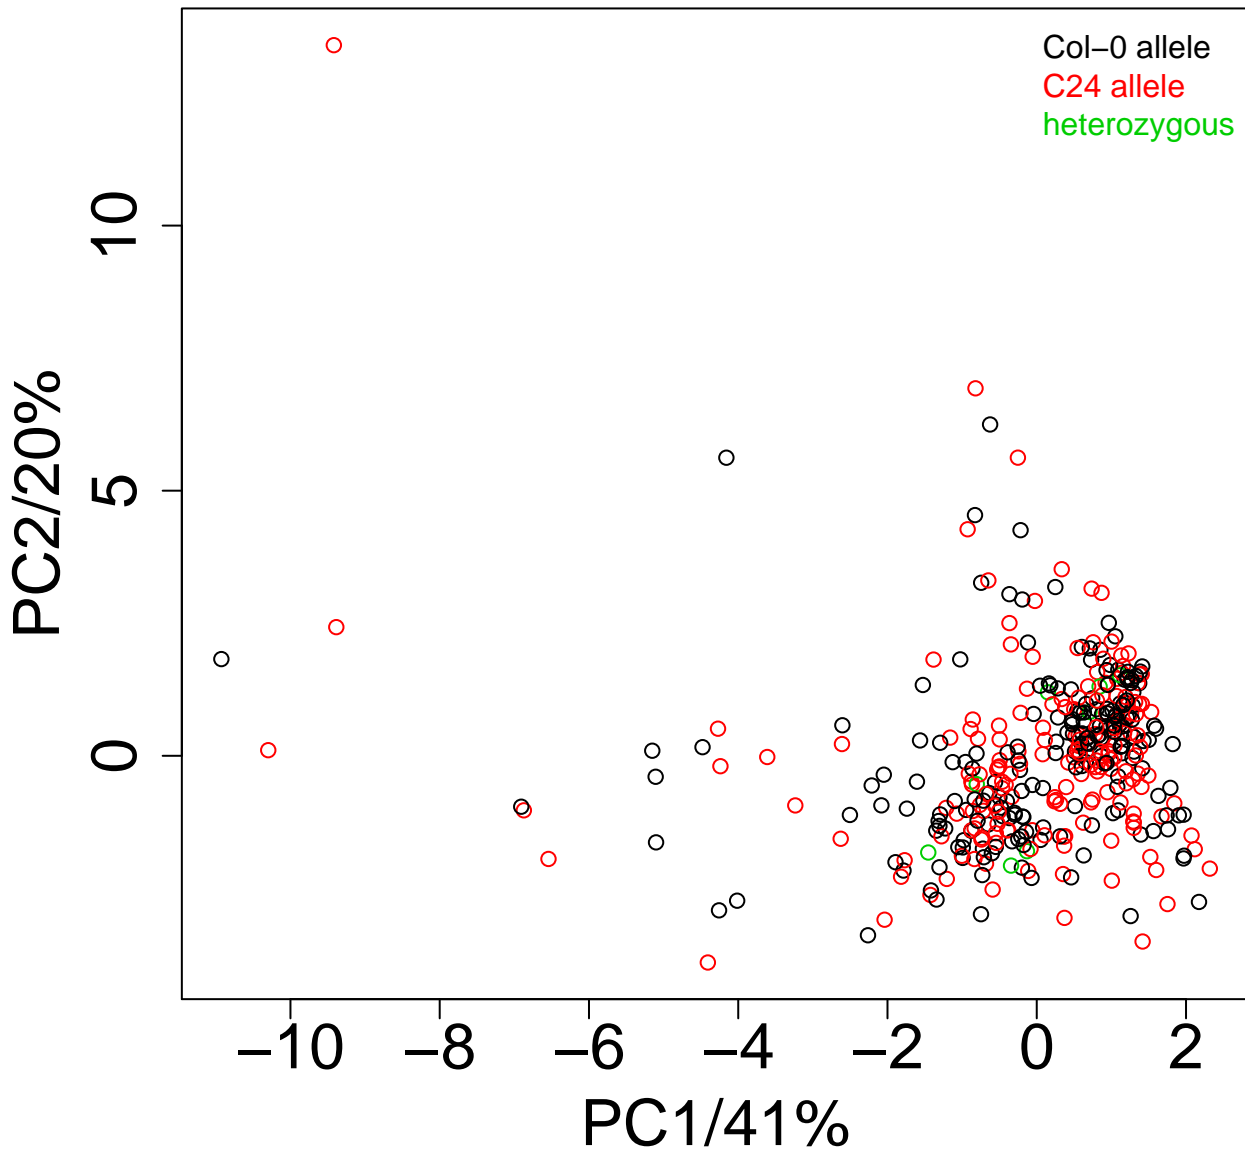

Chr. 1 Pos. 59.2 / MASC09205

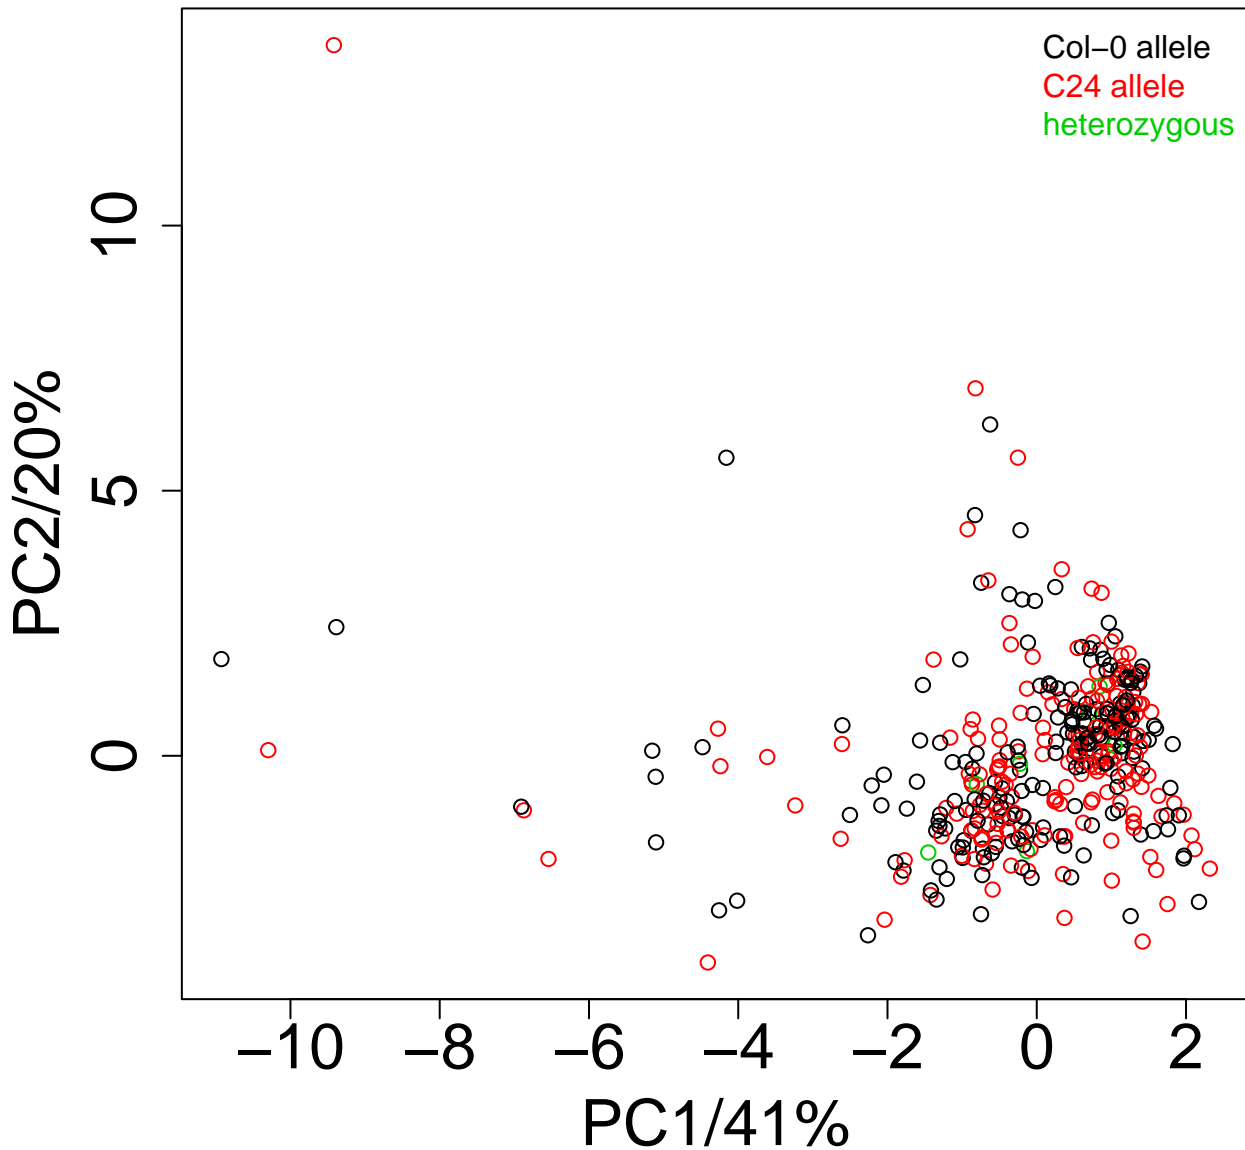



Chr. 1 Pos. 63 / MASC04170

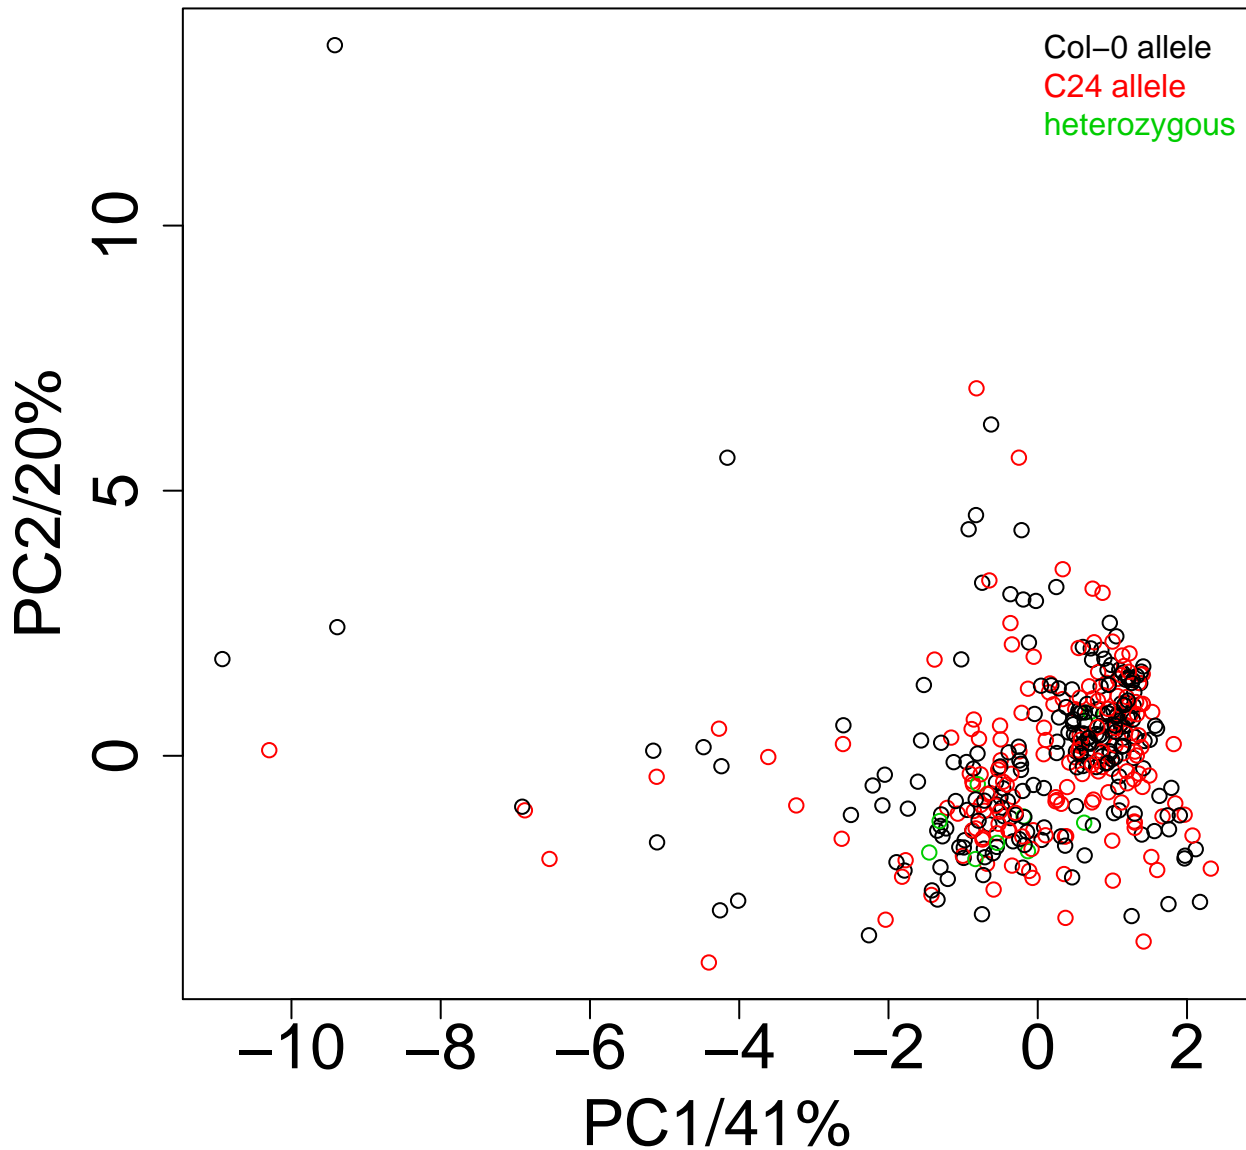

Chr. 1 Pos. 67.5 / MASC03447

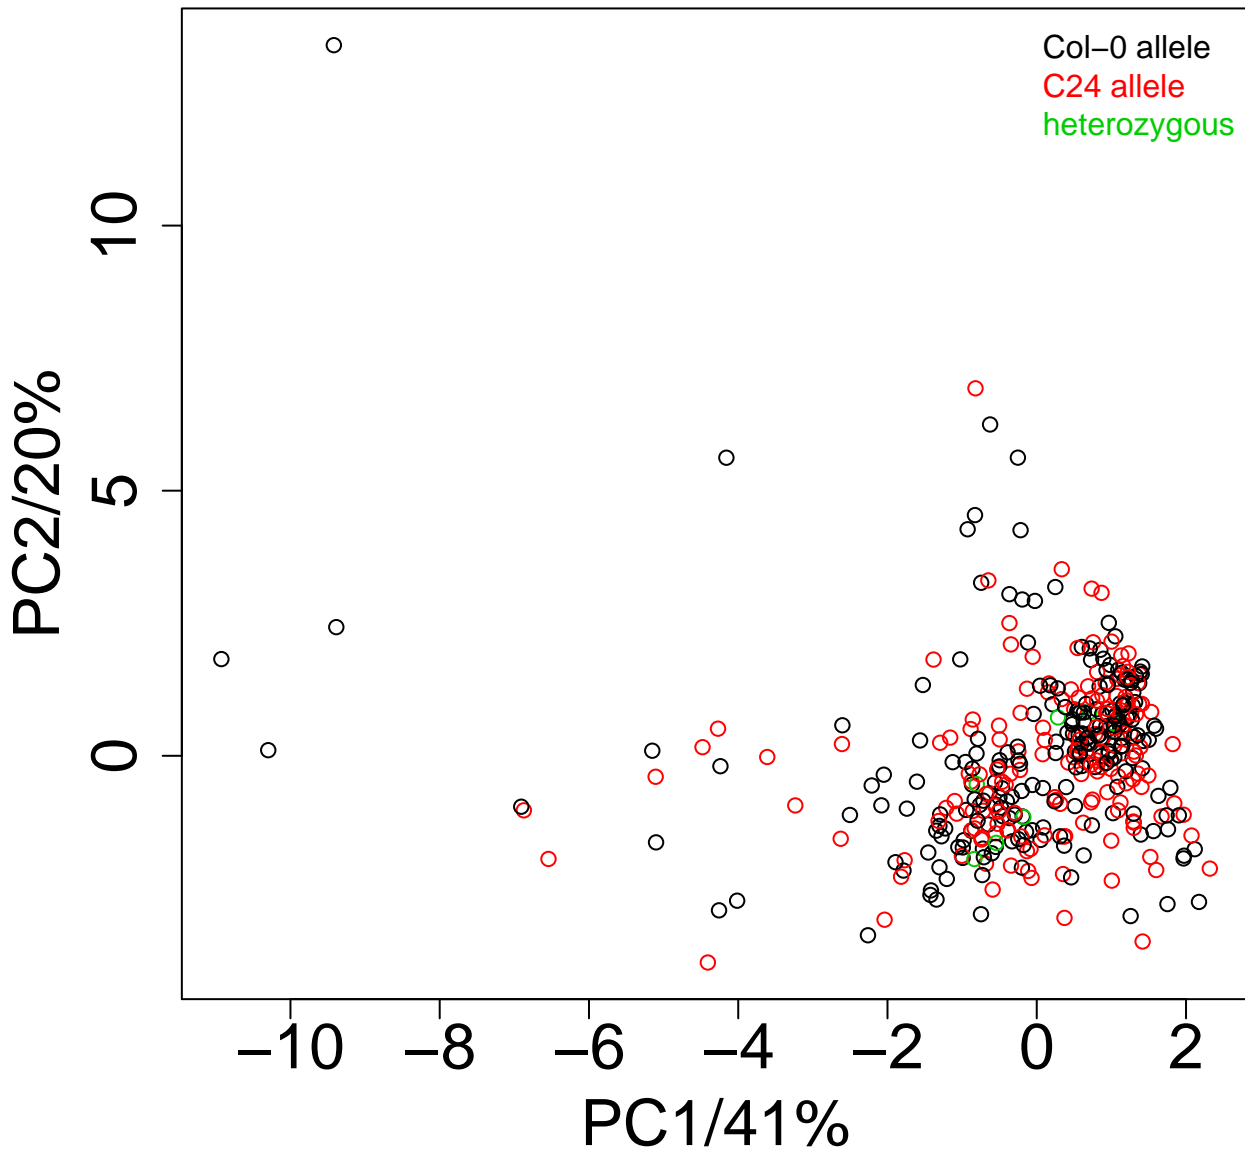

Chr. 1 Pos. 68.8 / F5114ID

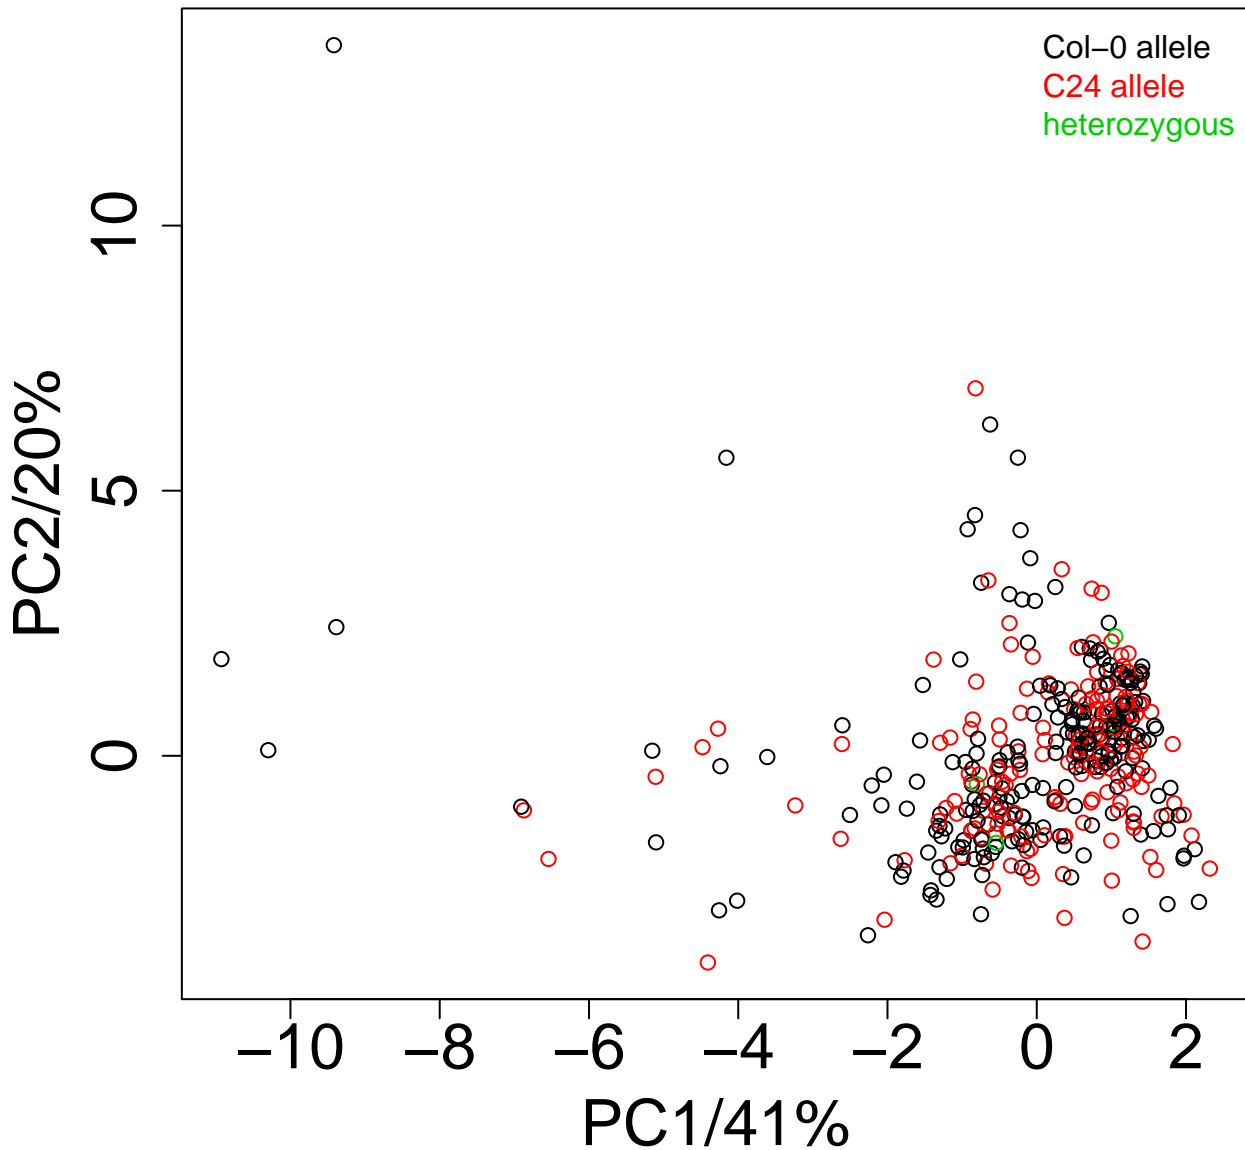

Chr. 1 Pos. 73.6 / MASC03631

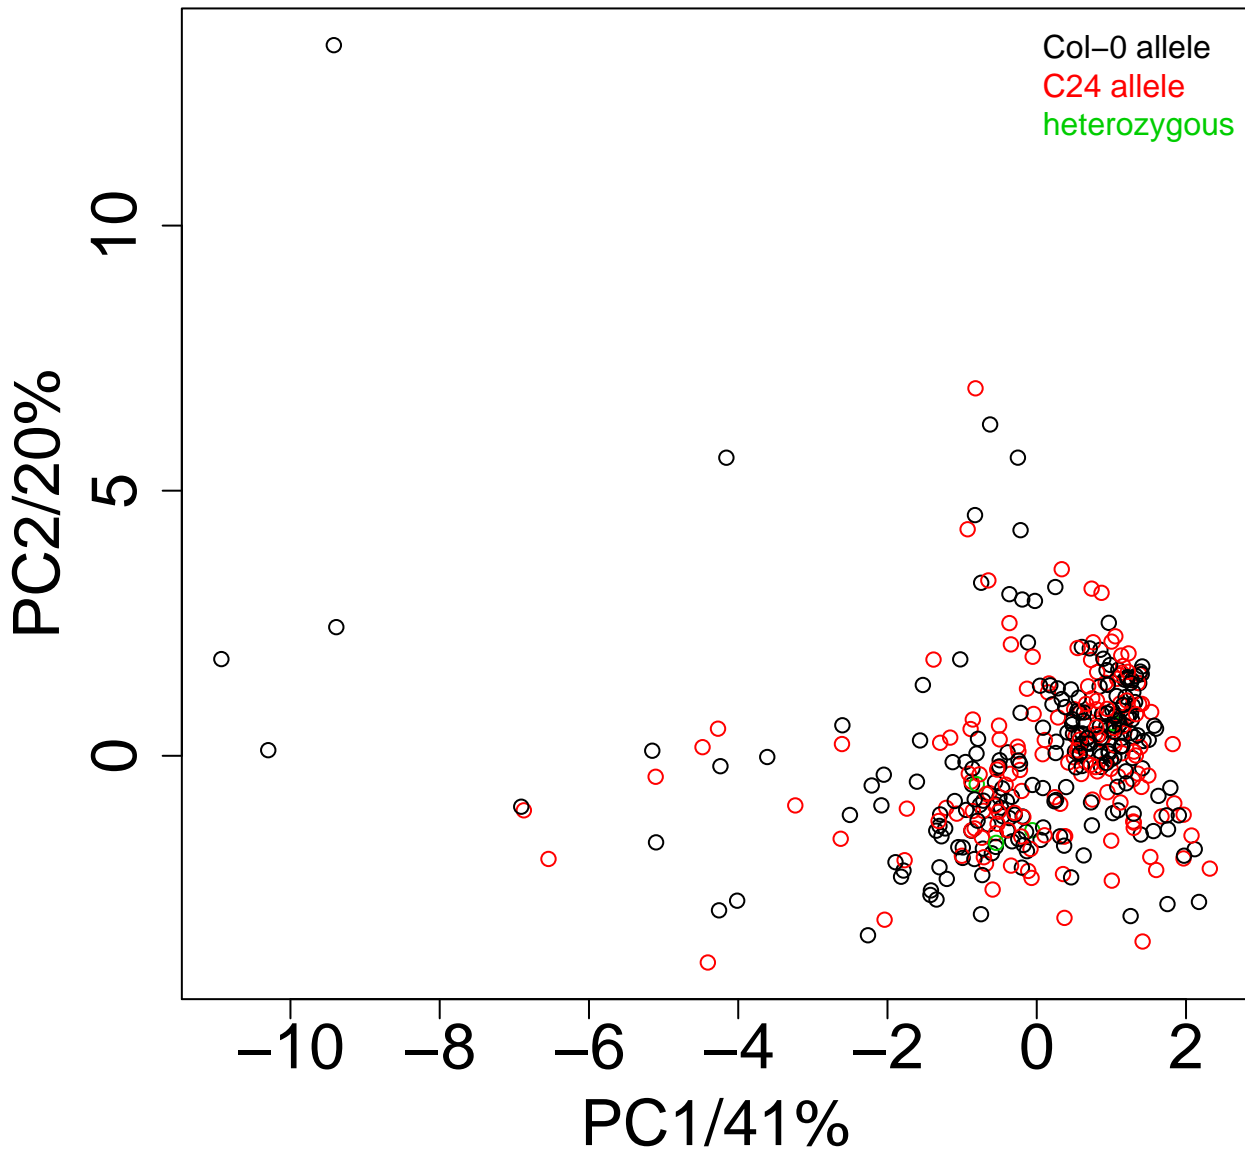

Chr. 1 Pos. 79.1 / M1\_8645

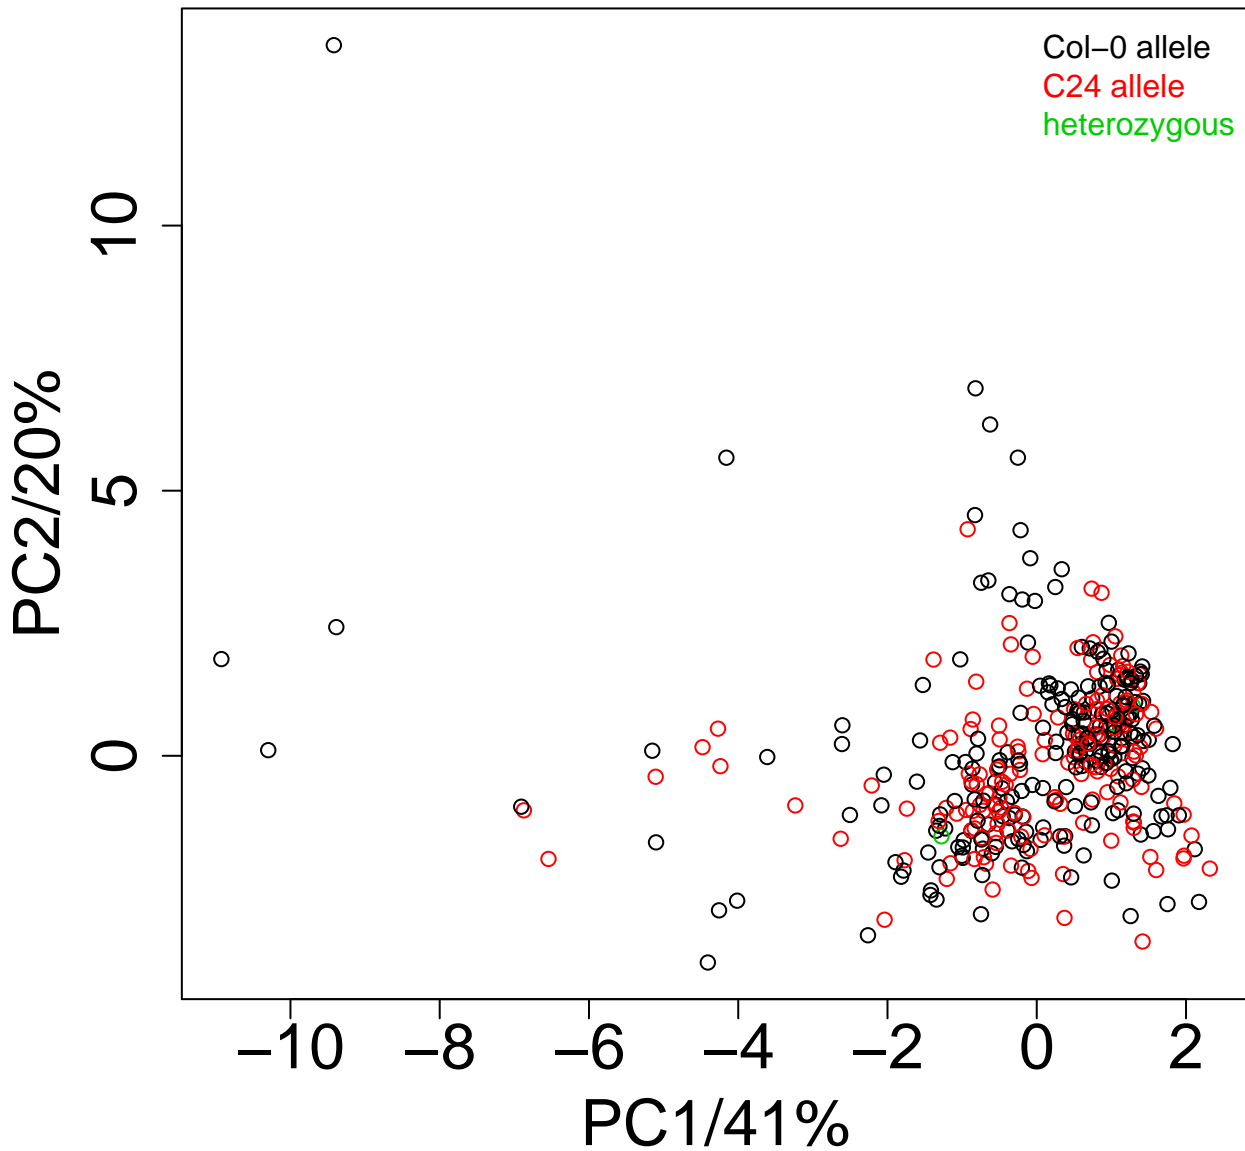

Chr. 1 Pos. 79.2 / MASC03684

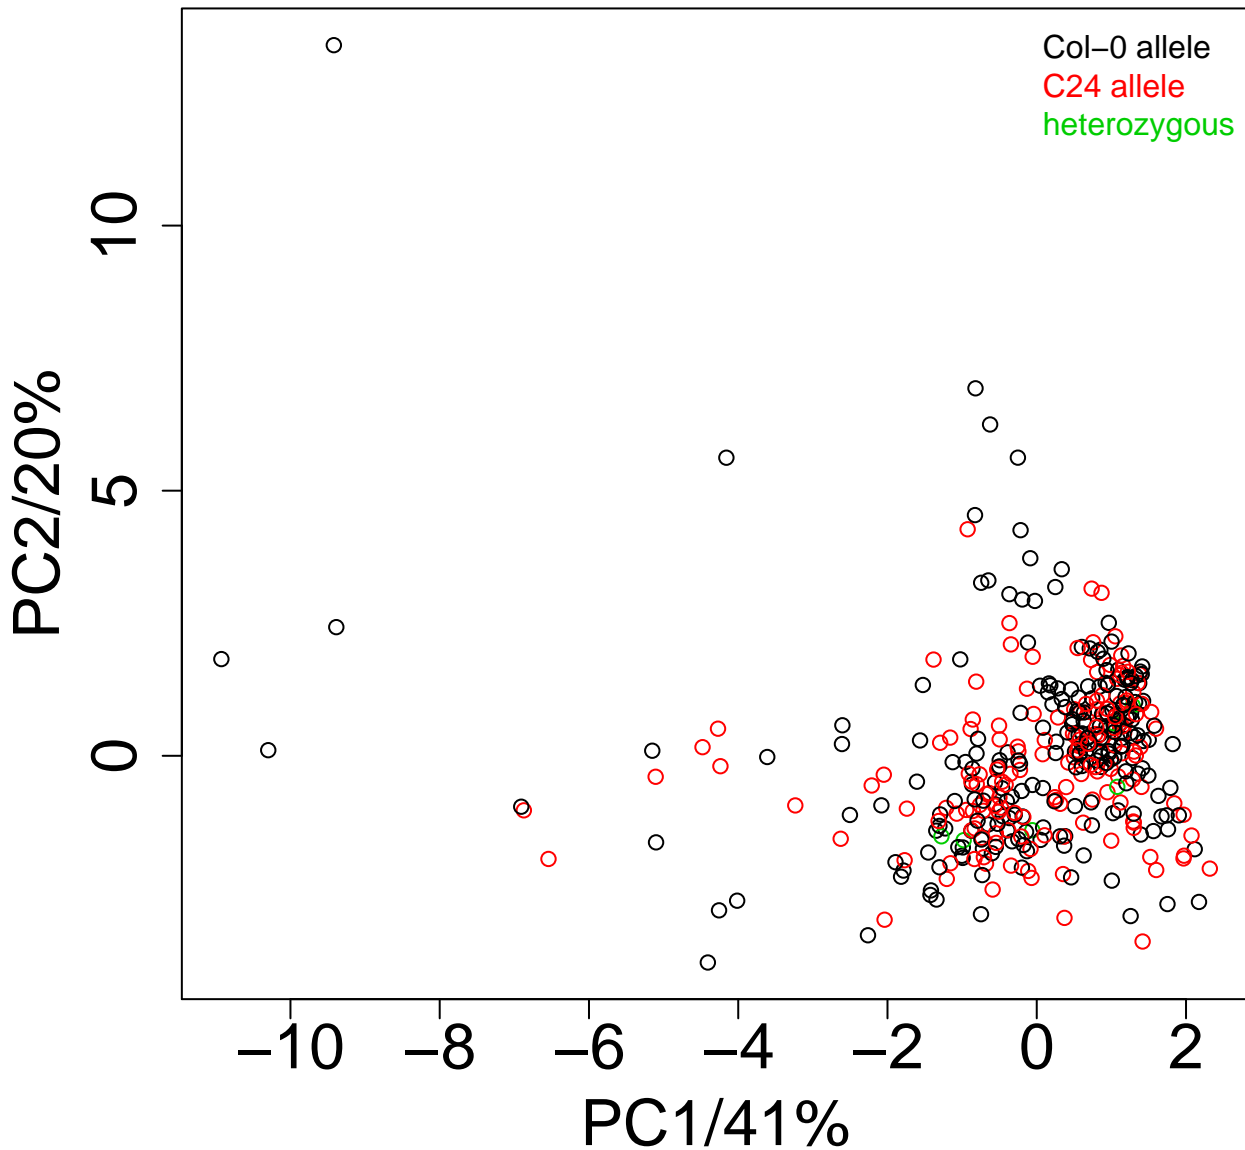

Chr. 1 Pos. 83.6 / MASC03930

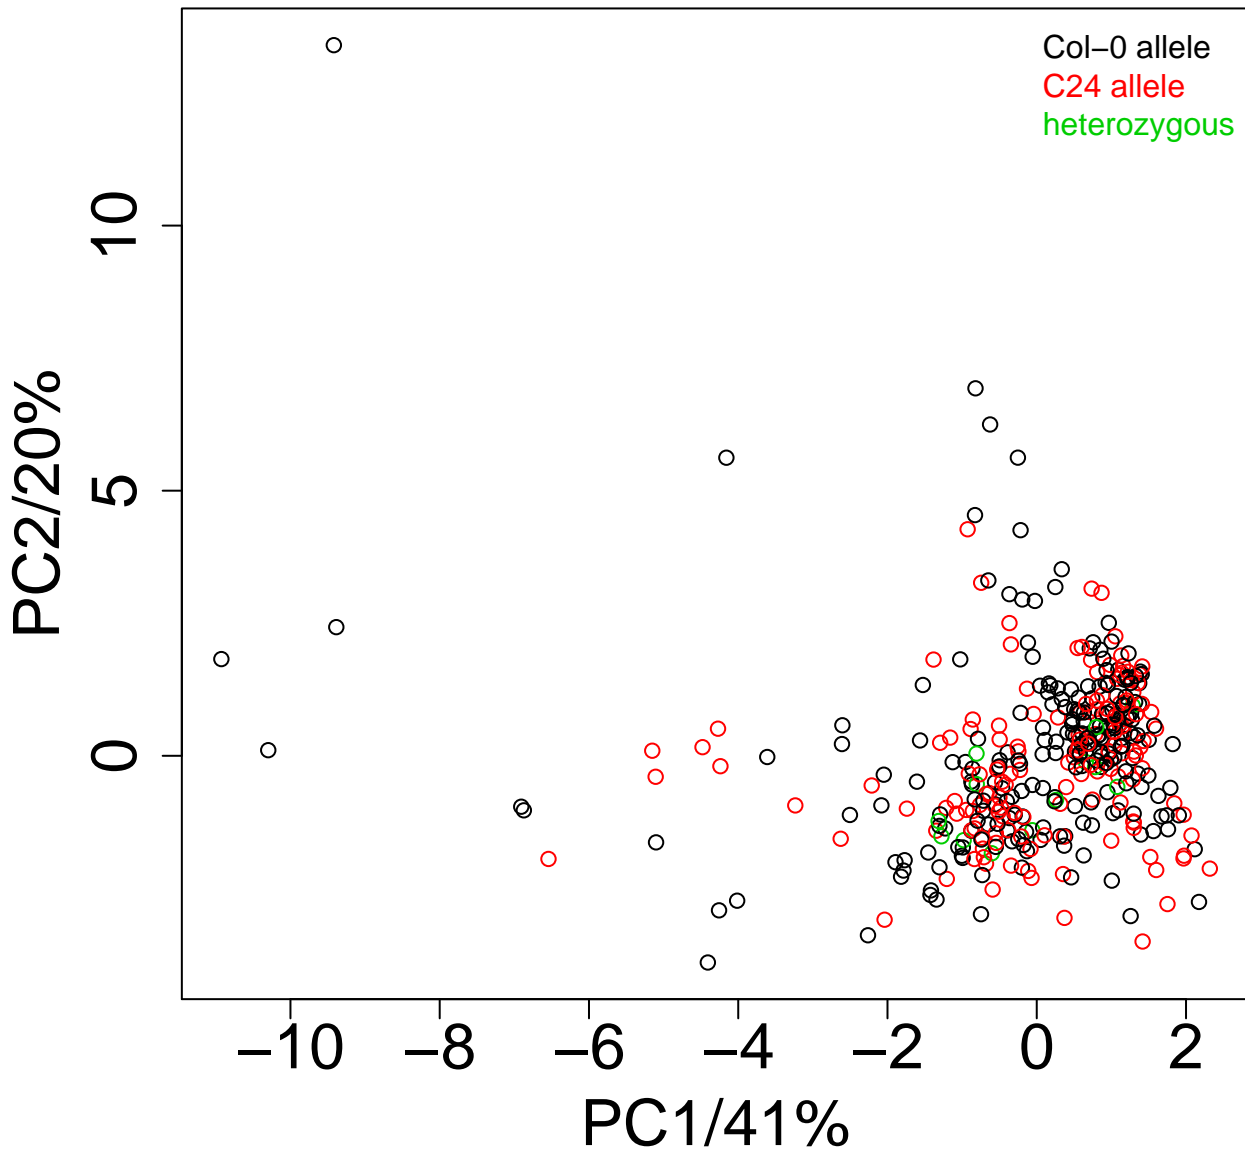

Chr. 1 Pos. 86.3 / MASC03765

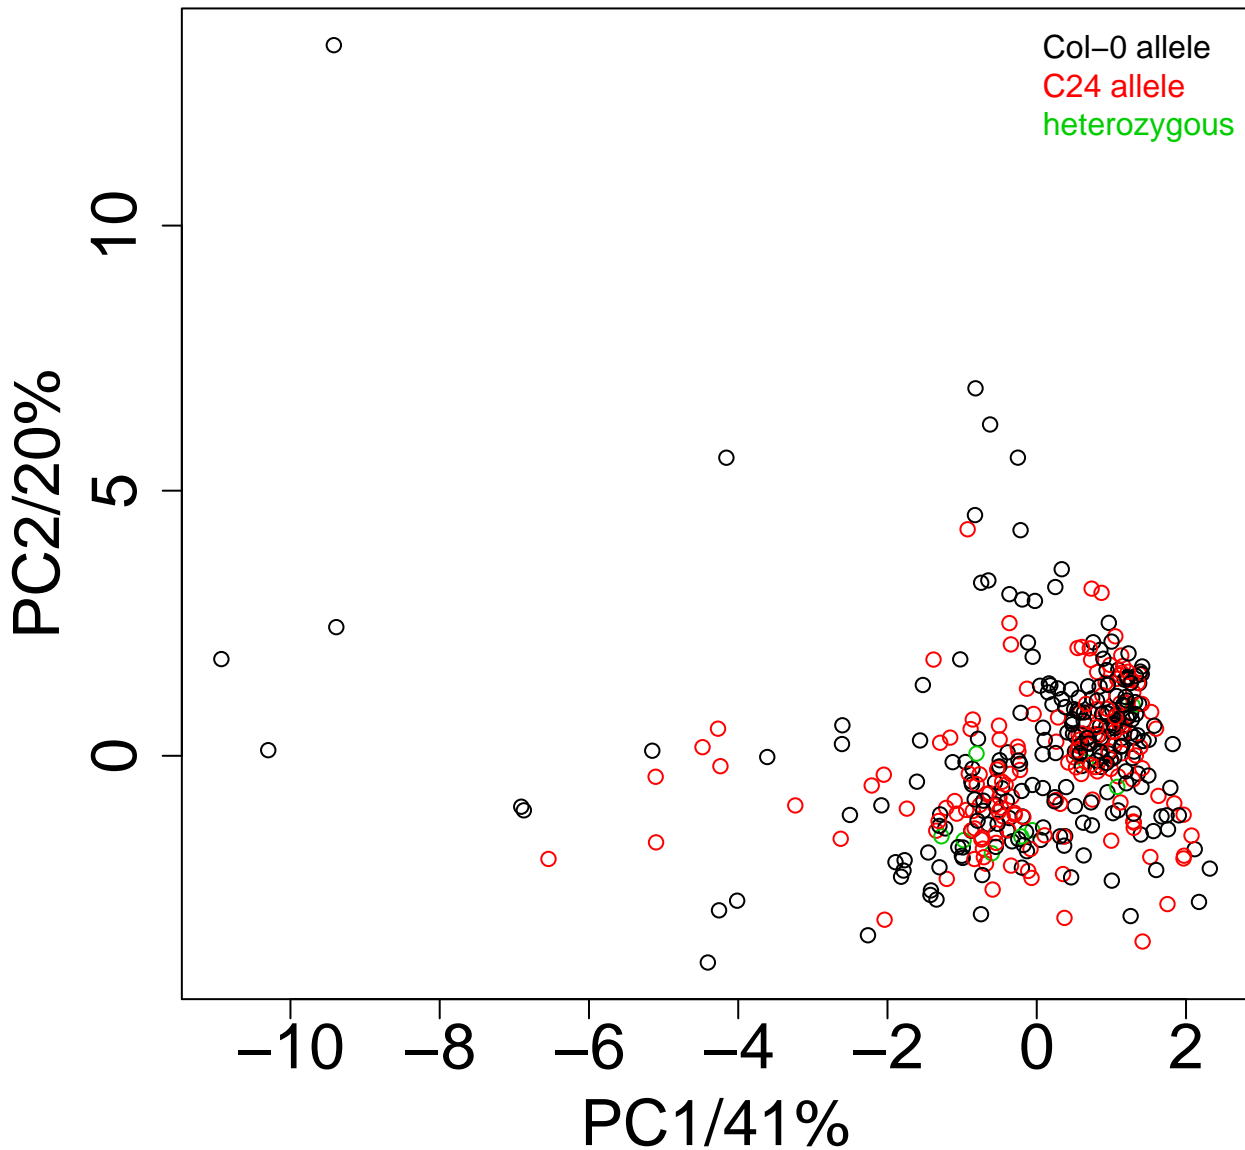



Chr. 1 Pos. 90.3 / MASC09206

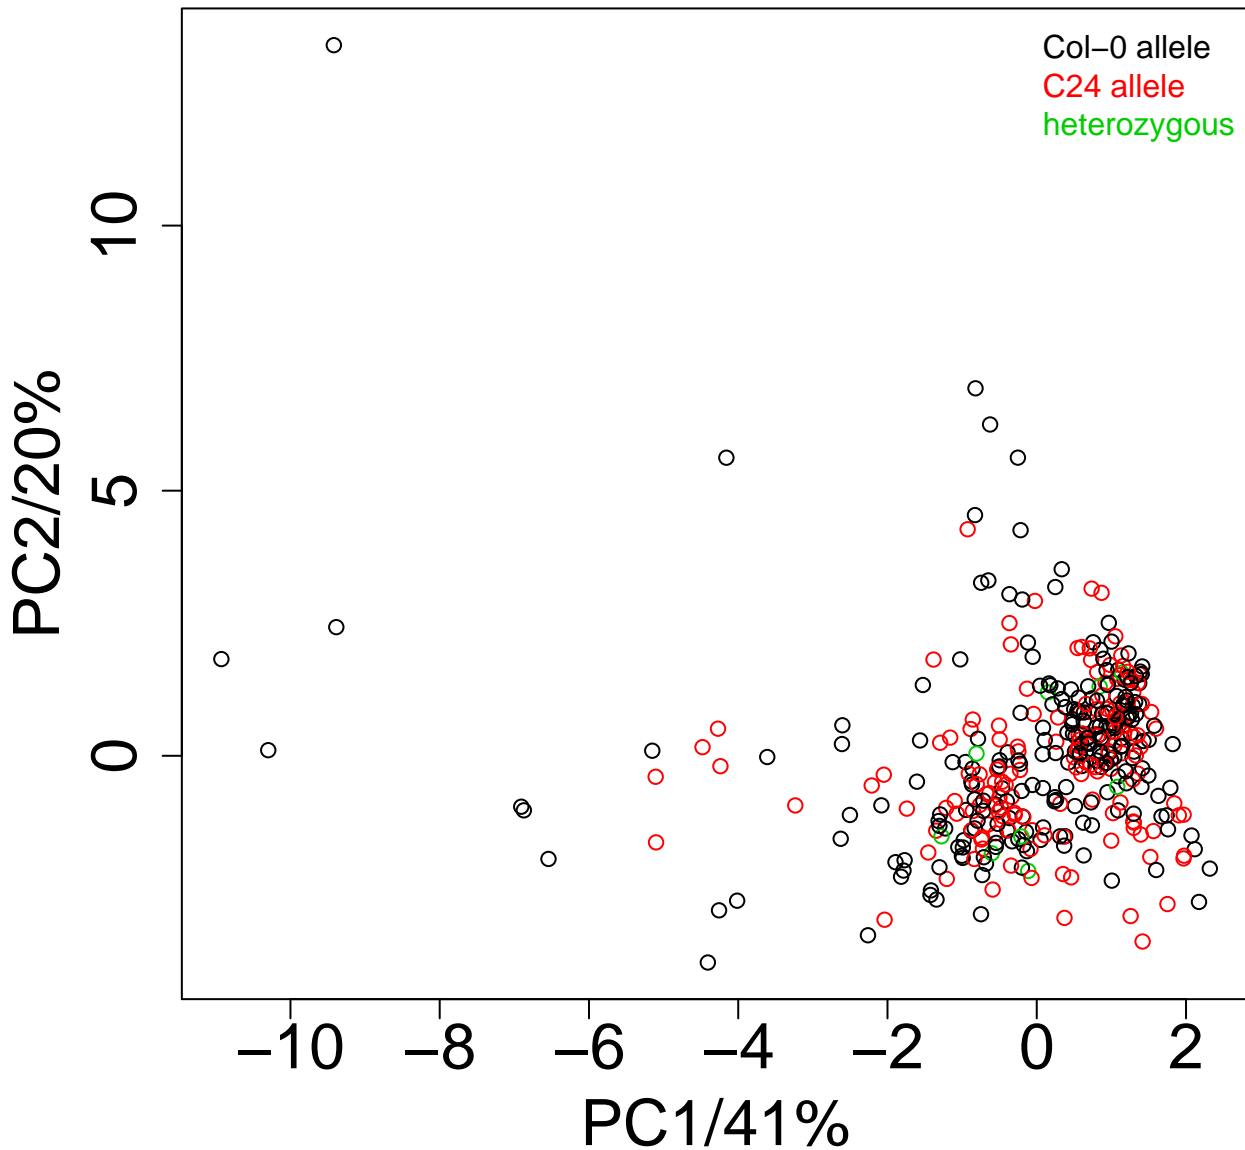

Chr. 2 Pos. 0 / MASC05502

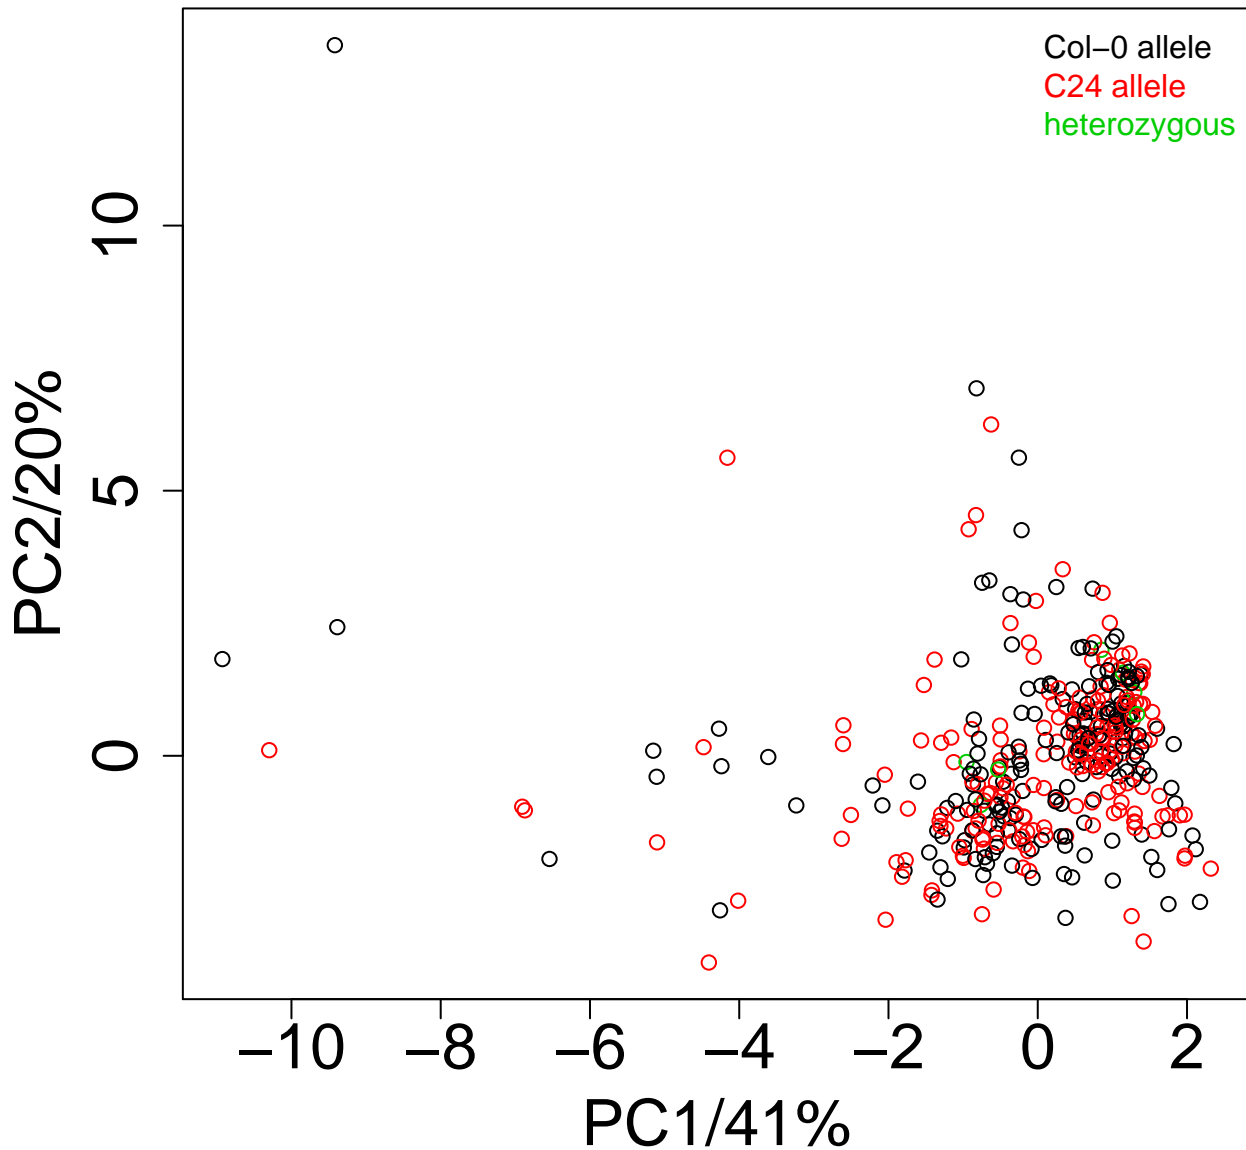

Chr. 2 Pos. 0.9 / MSAT2.5

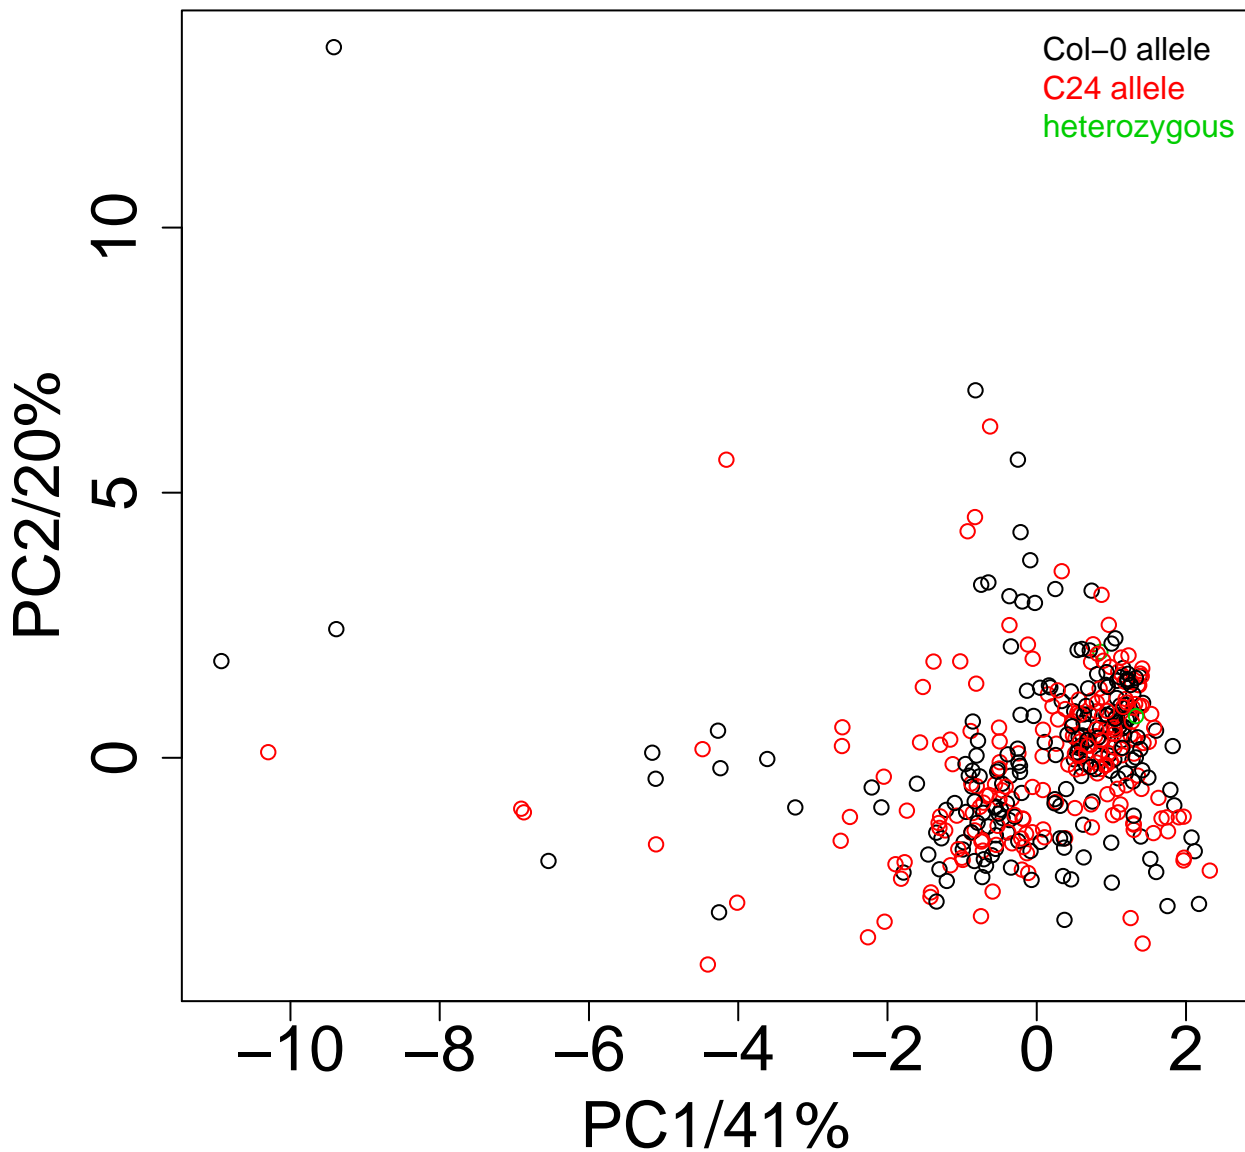

Chr. 2 Pos. 6 / T16F16ID

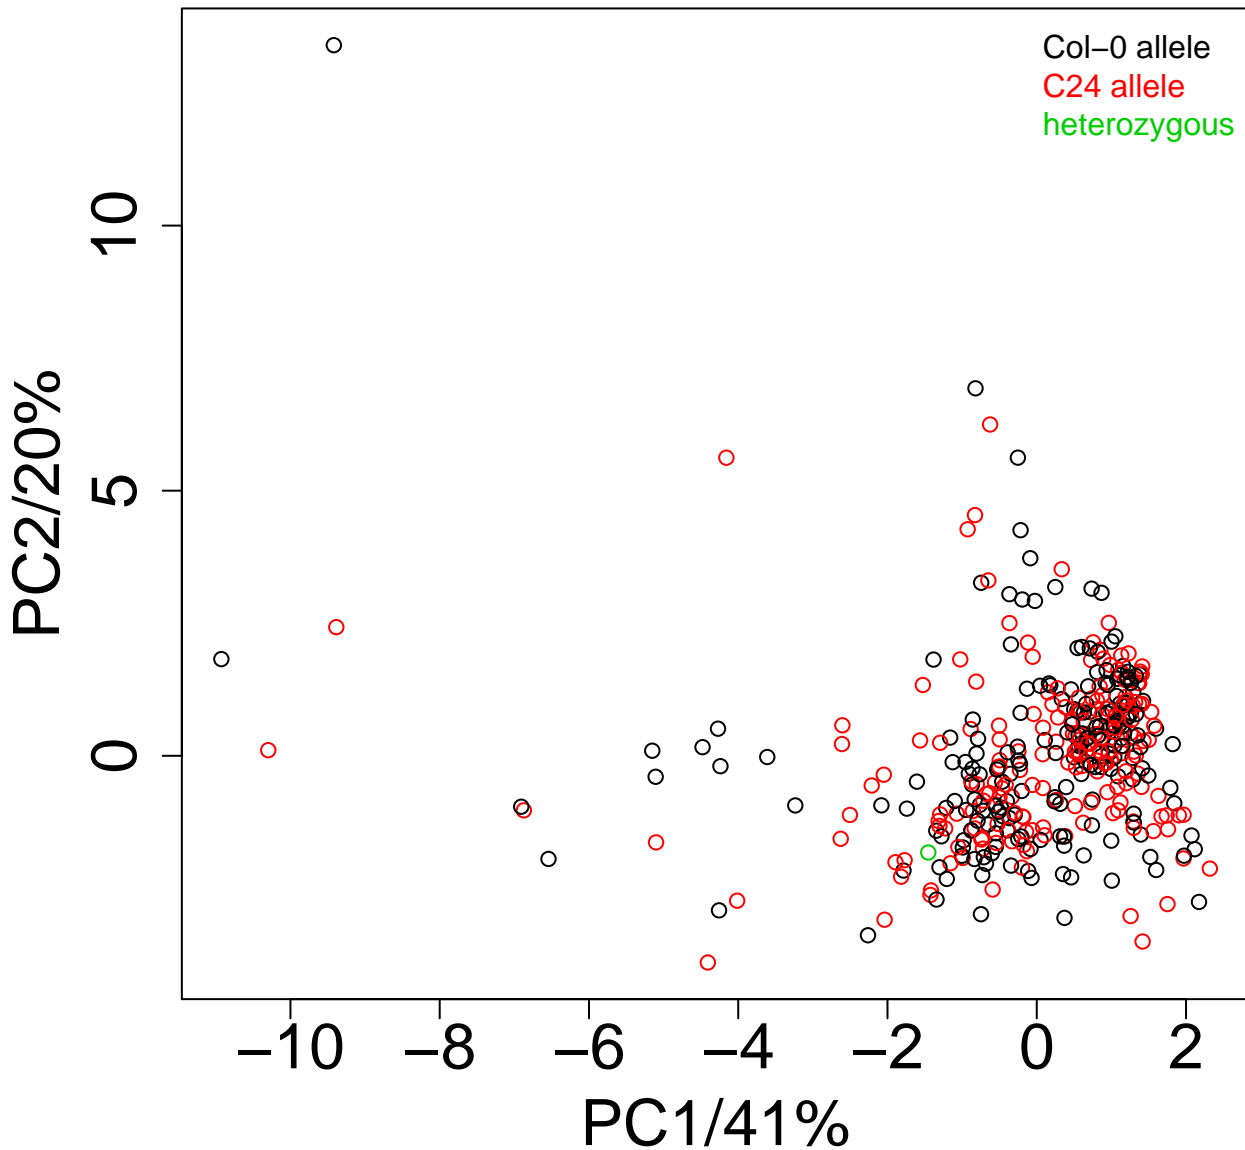

Chr. 2 Pos. 6.1 / nga1145

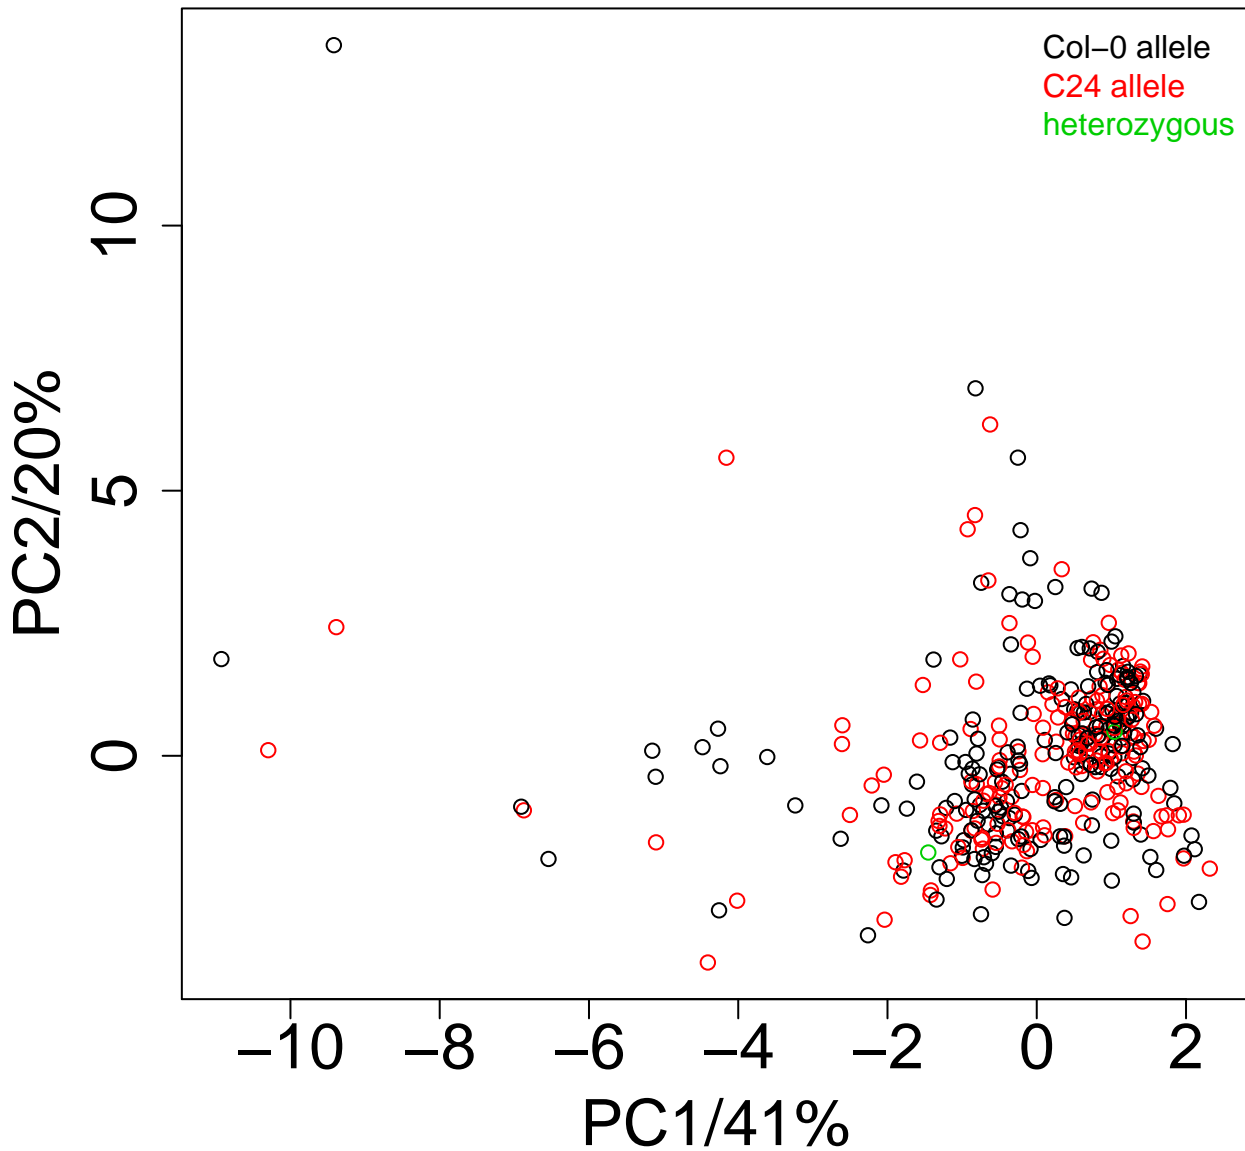

Chr. 2 Pos. 8.7 / MASC05477

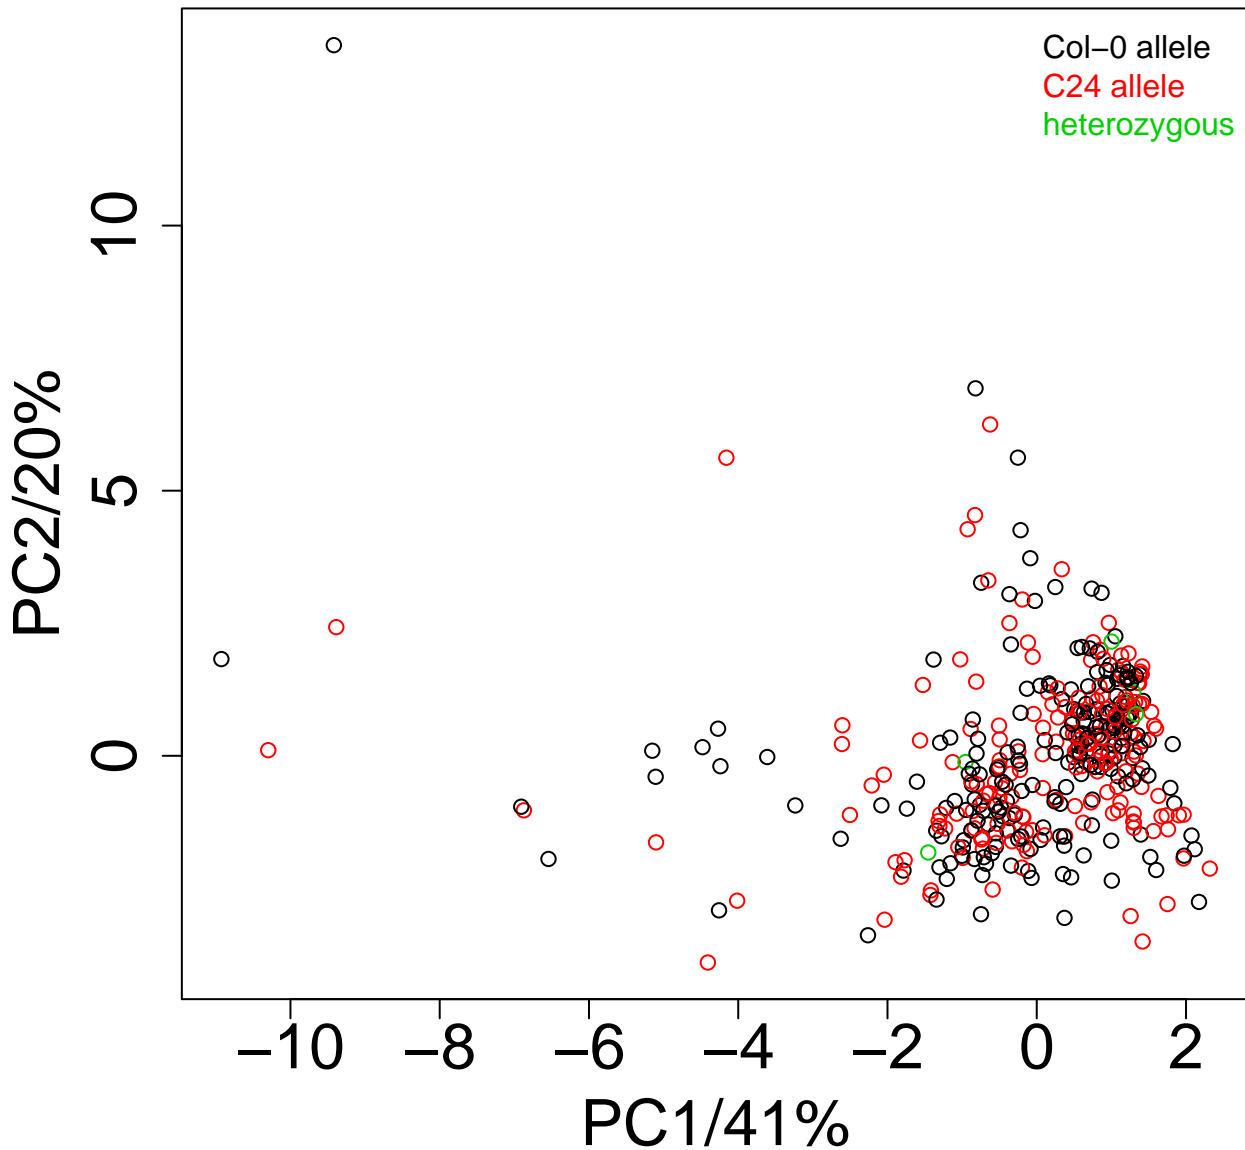

Chr. 2 Pos. 11.4 / MASC06808

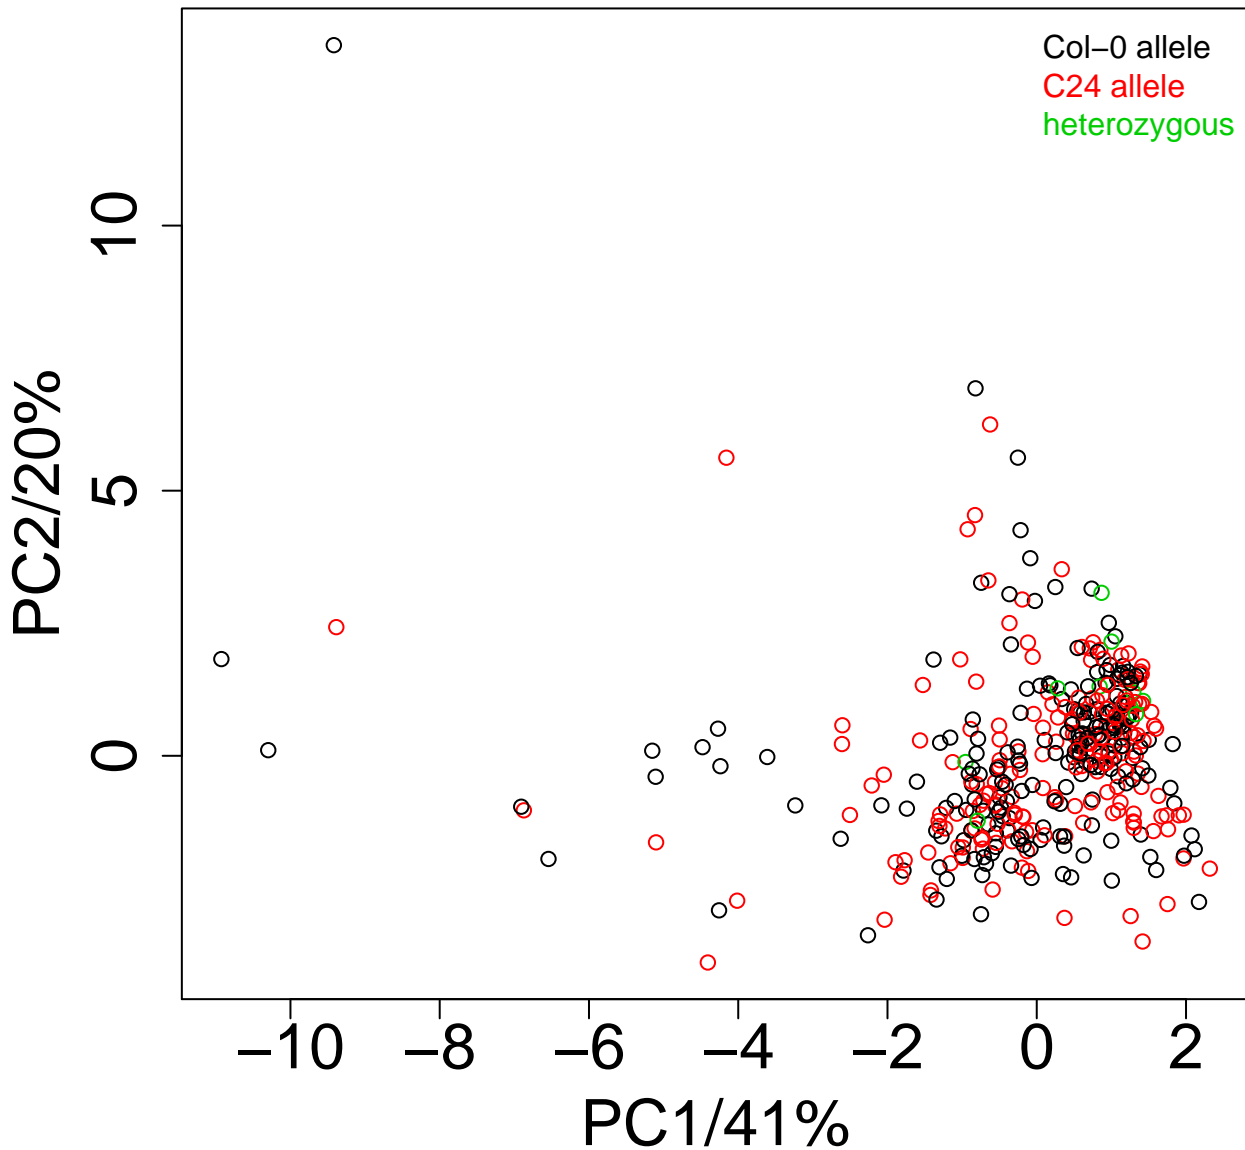

Chr. 2 Pos. 14 / MASC05962

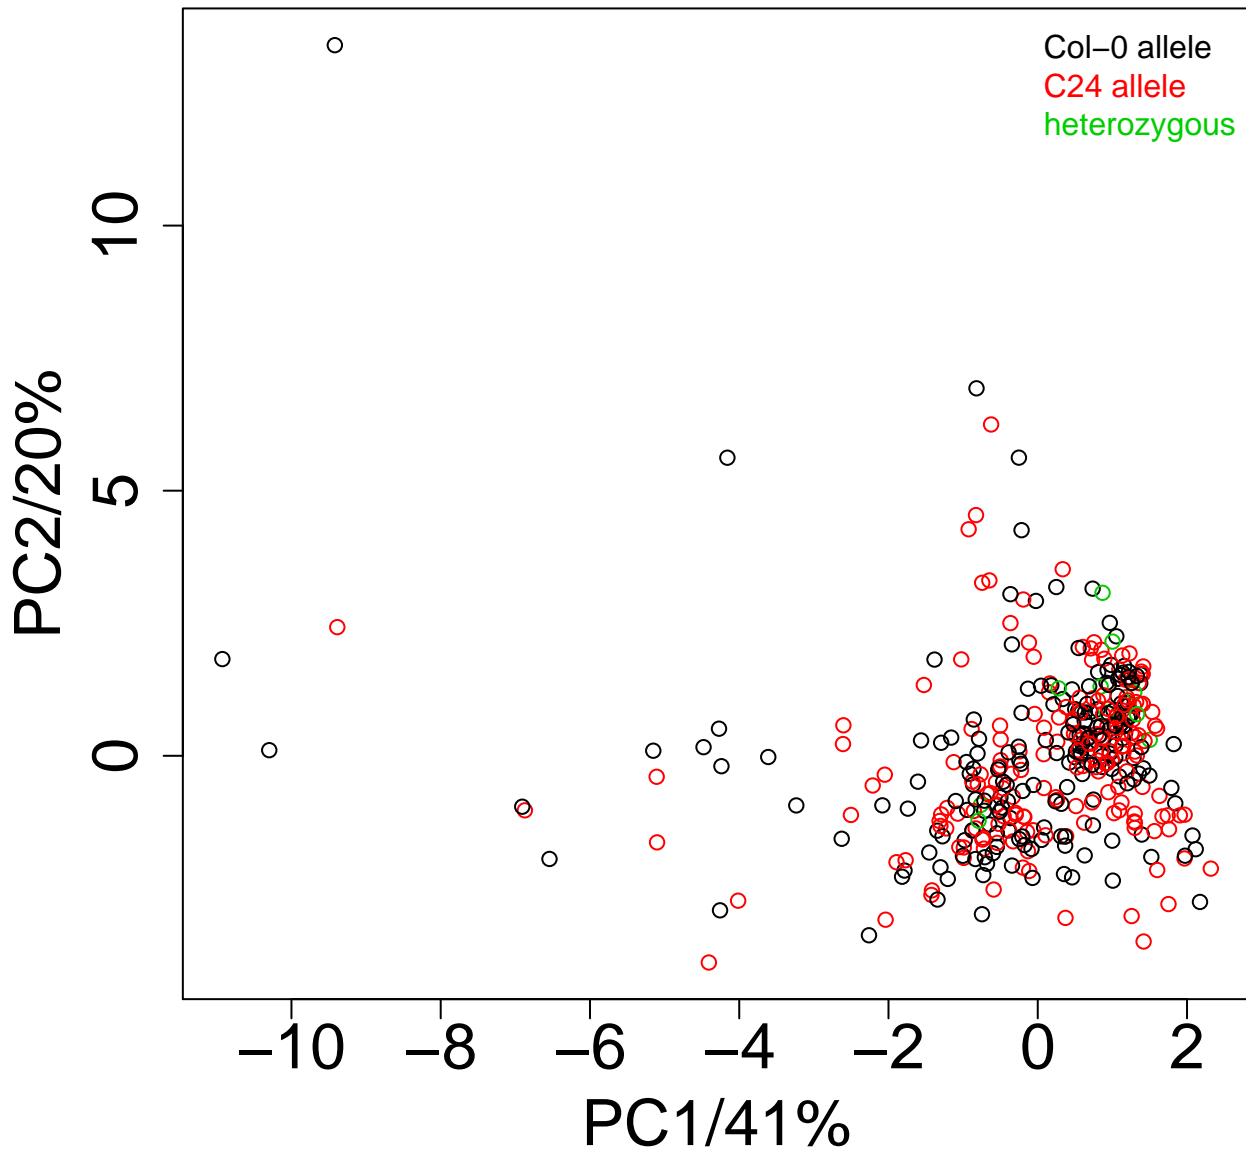



Chr. 2 Pos. 14 / MASC05803

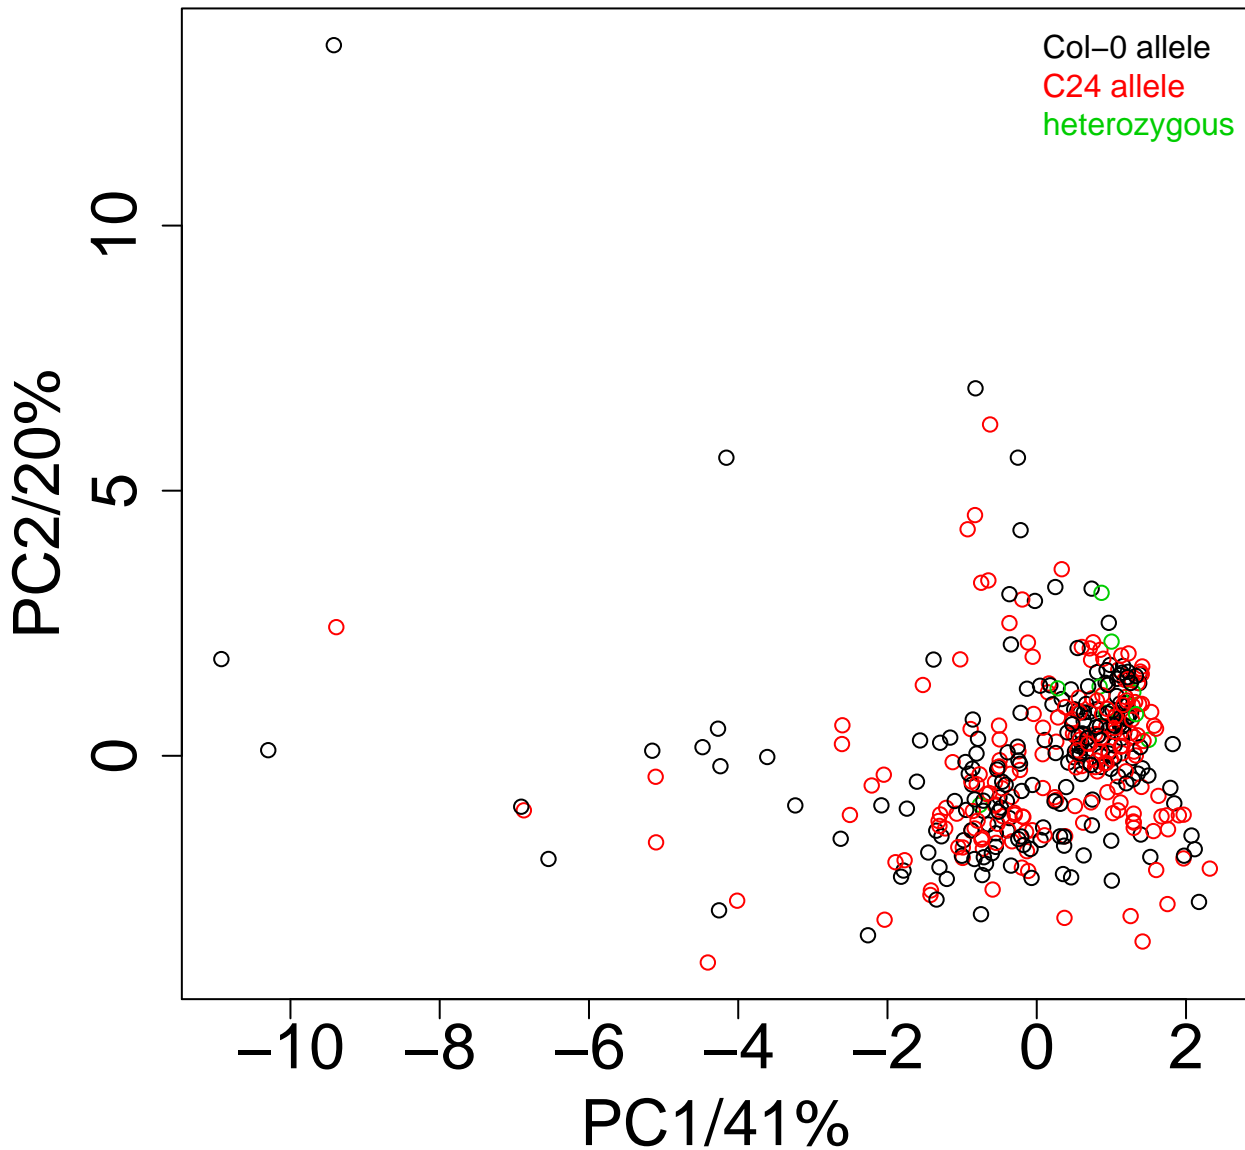

Chr. 2 Pos. 14 / MASC05857

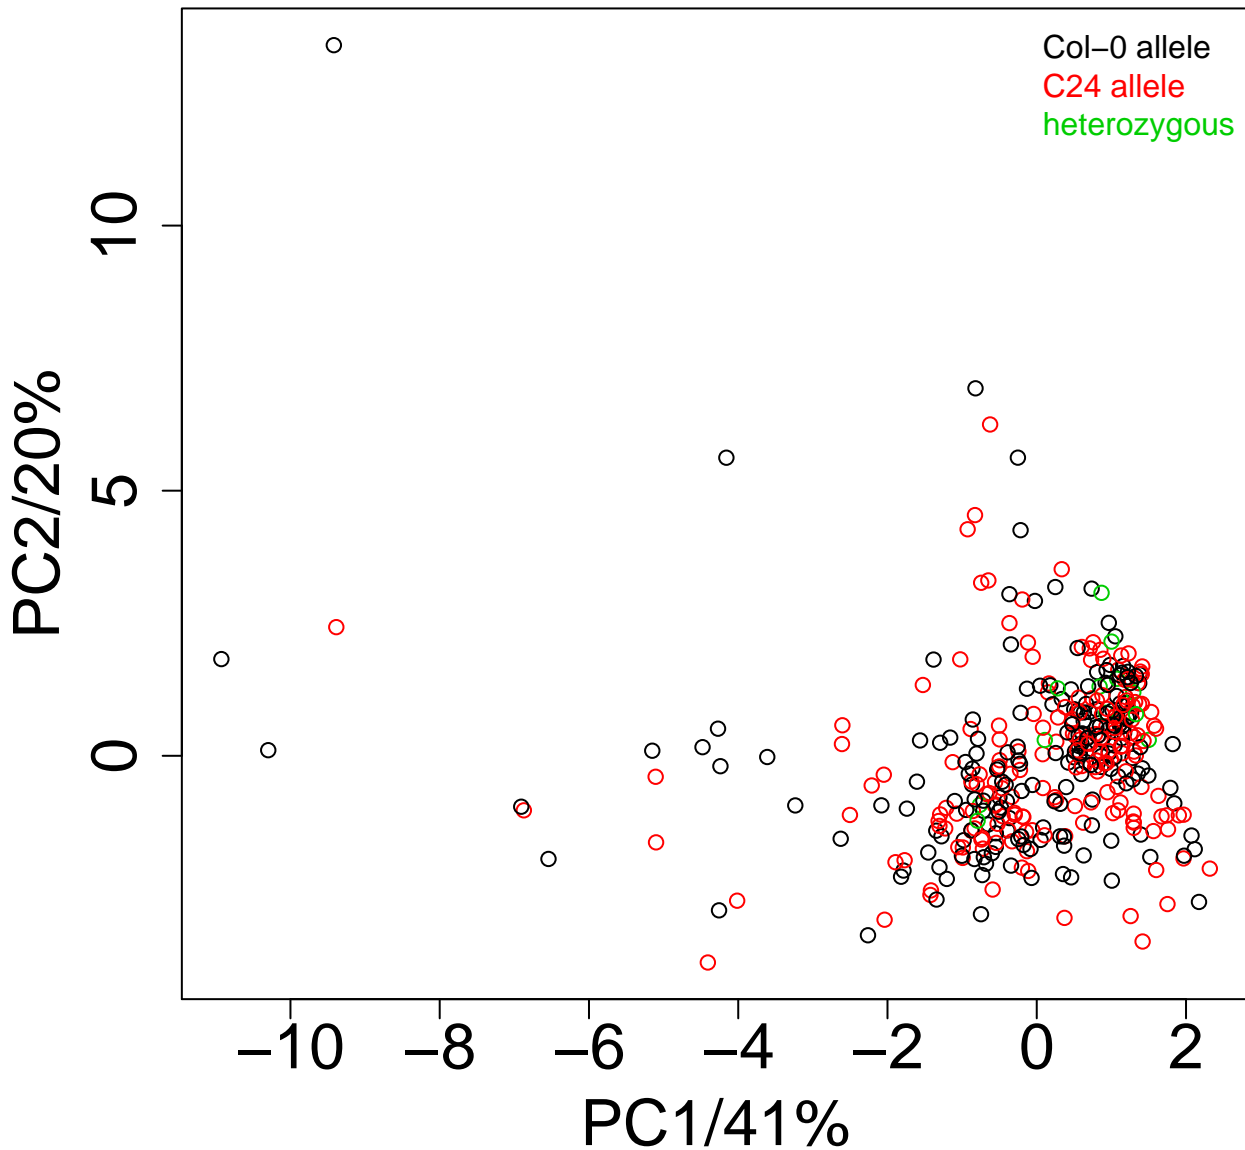

Chr. 2 Pos. 14 / MASC05361

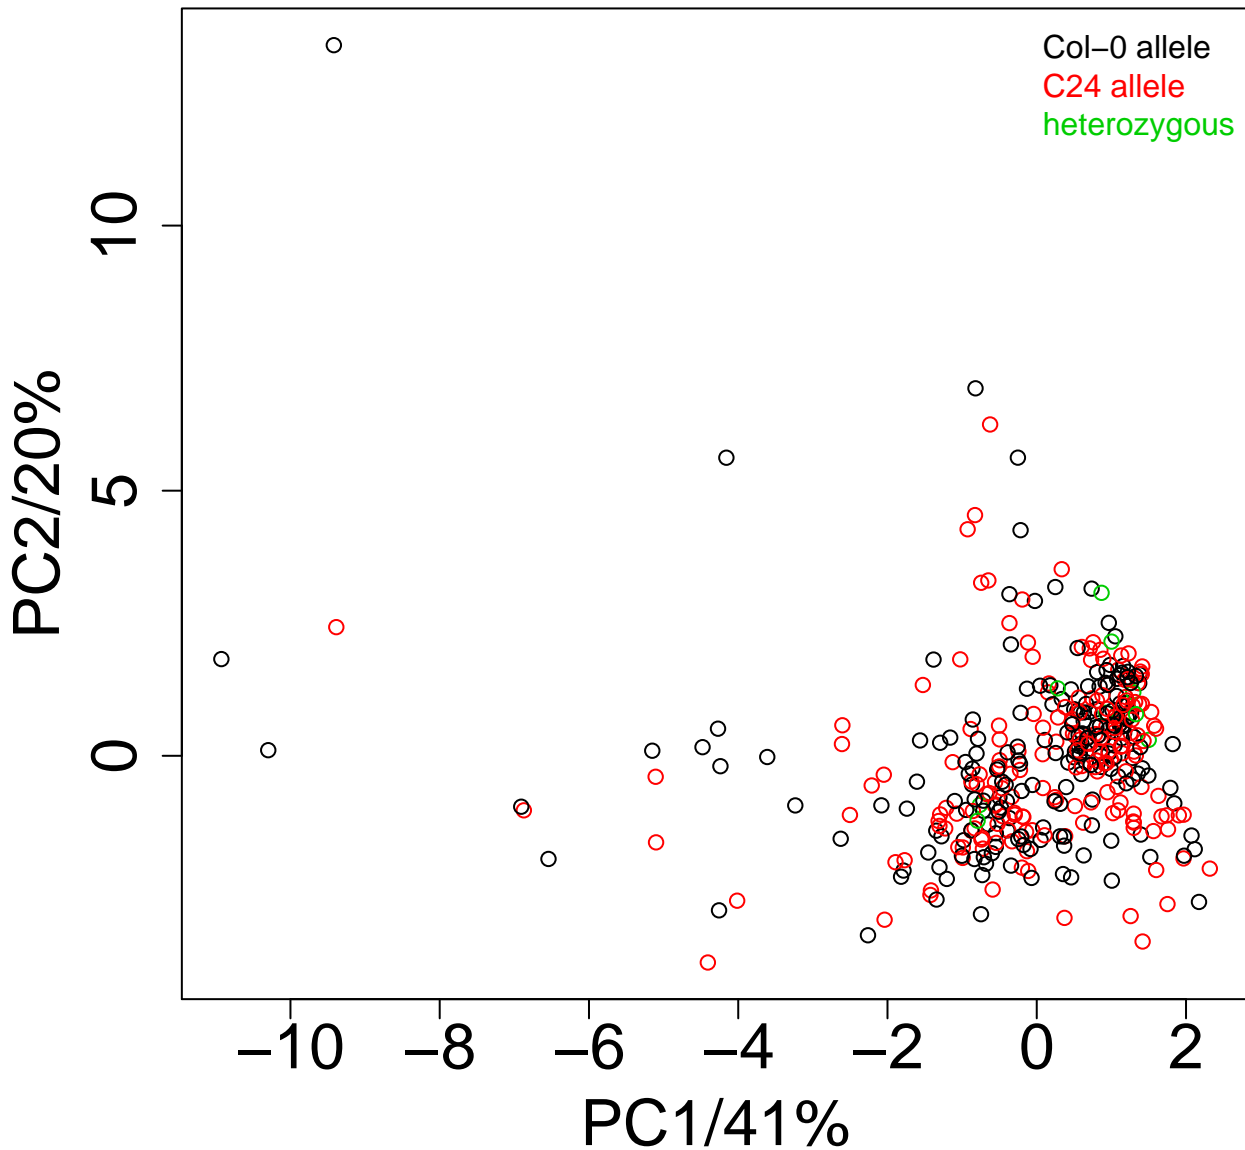

Chr. 2 Pos. 25.4 / MASC05657

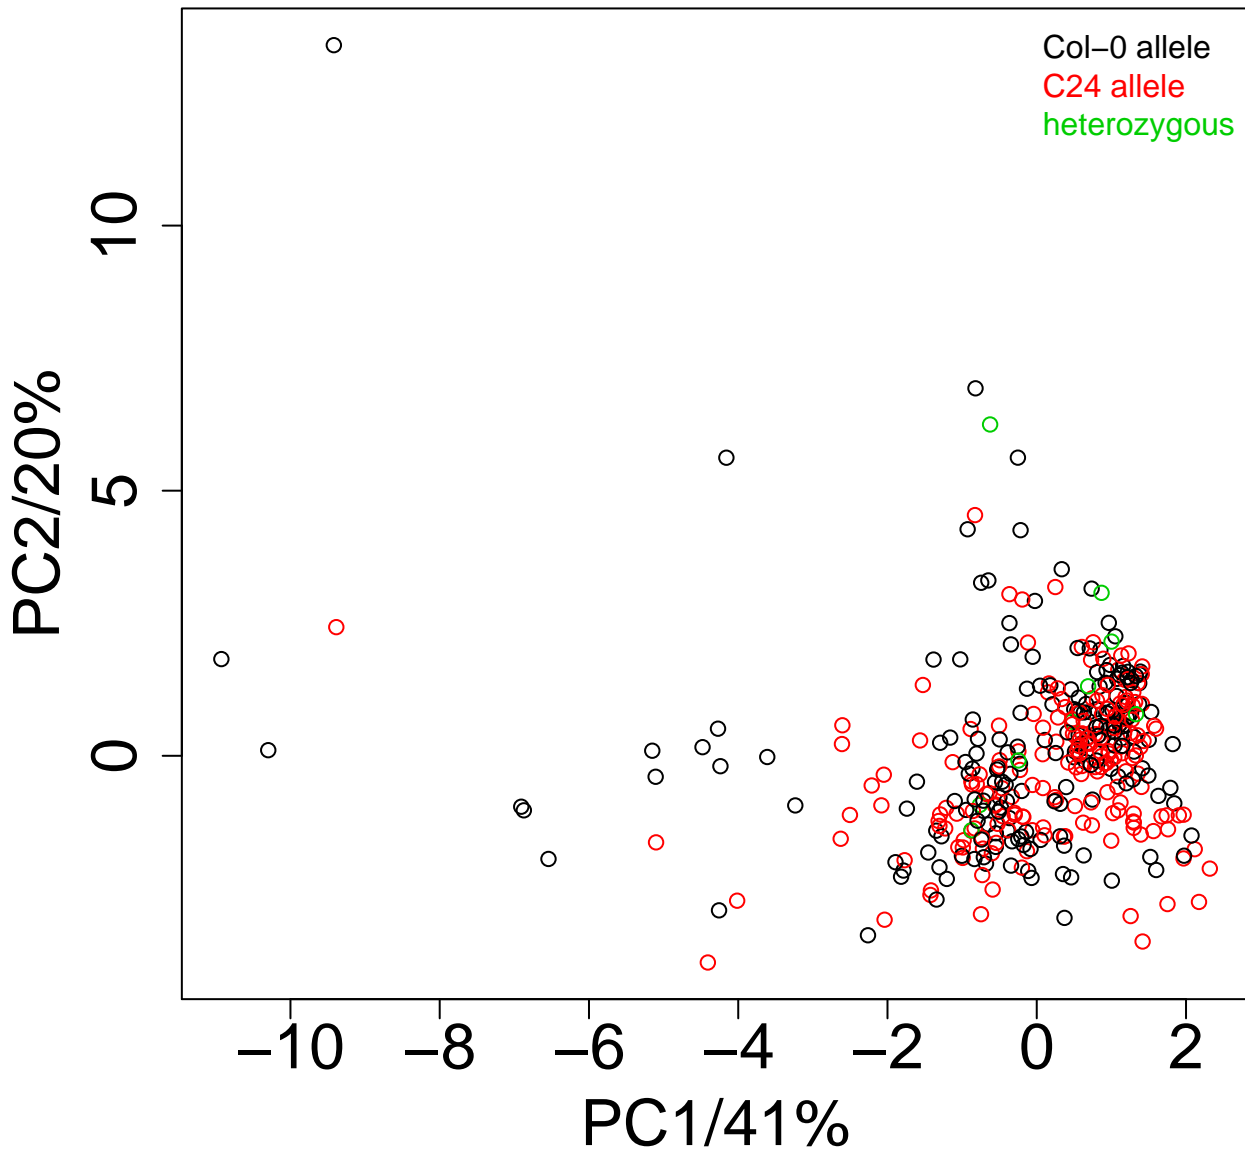

Chr. 2 Pos. 30.1 / M2\_4269

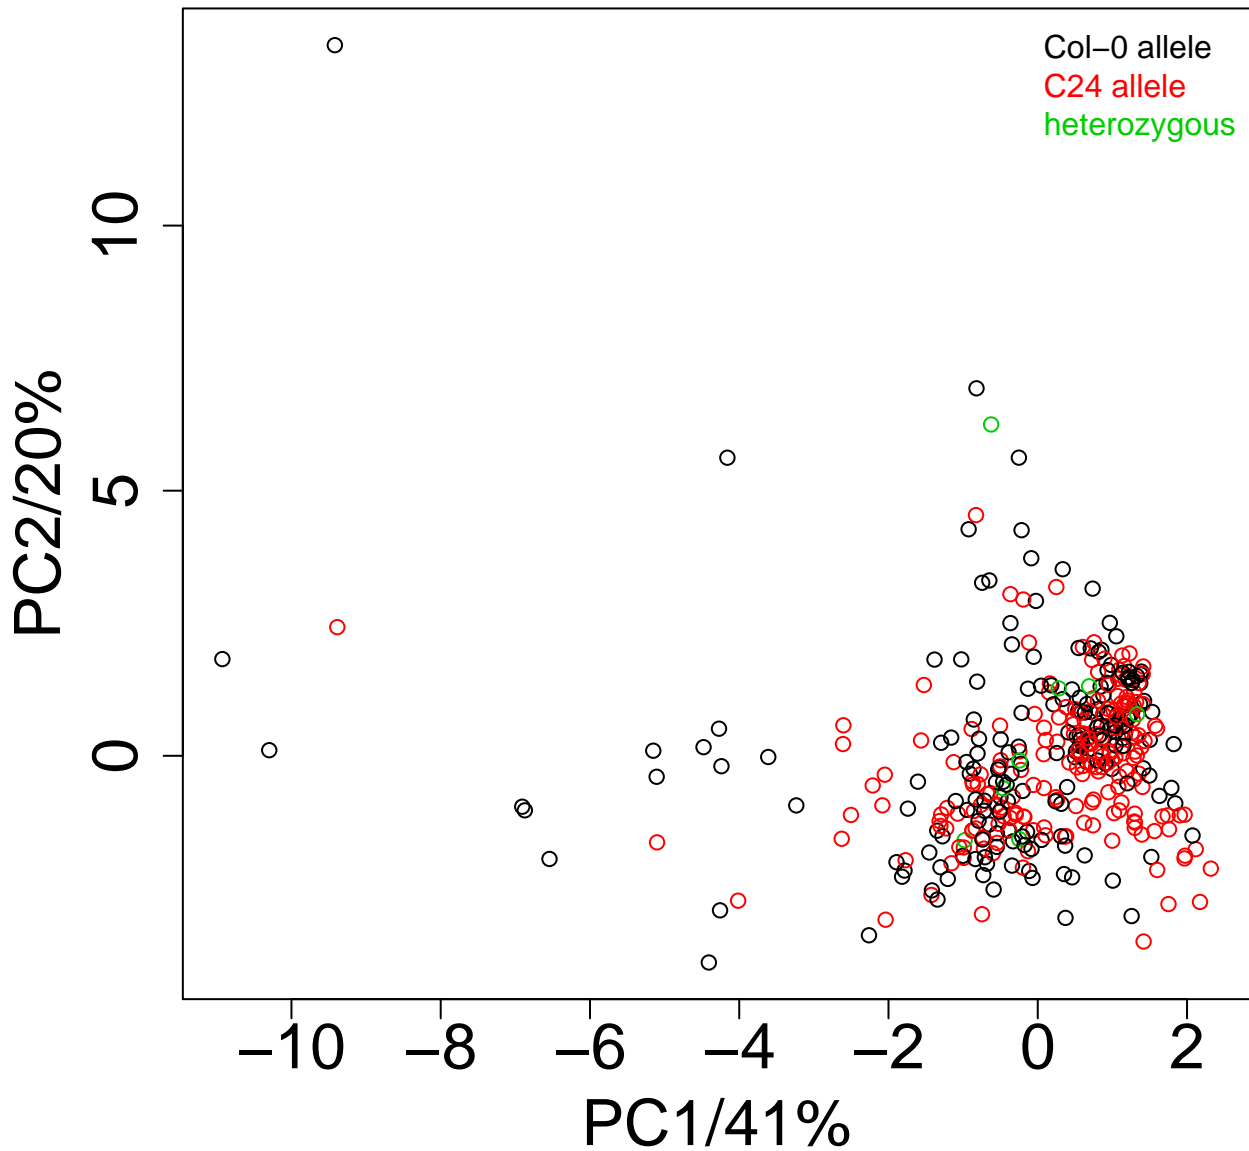

Chr. 2 Pos. 30.3 / MASC02747

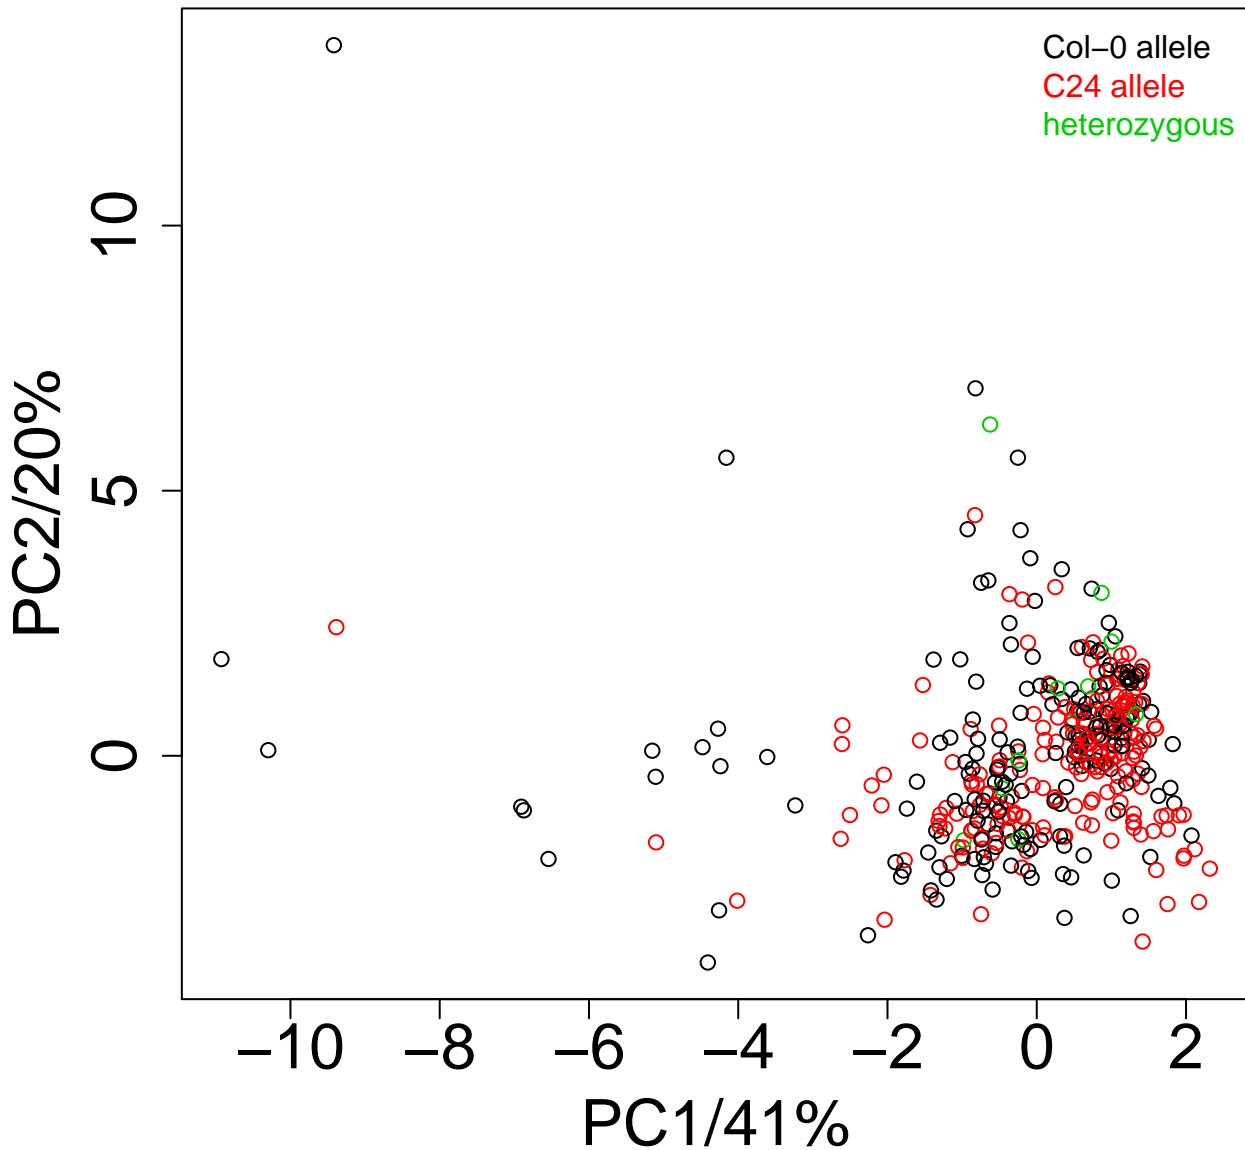

Chr. 2 Pos. 33.1 / MASC02600

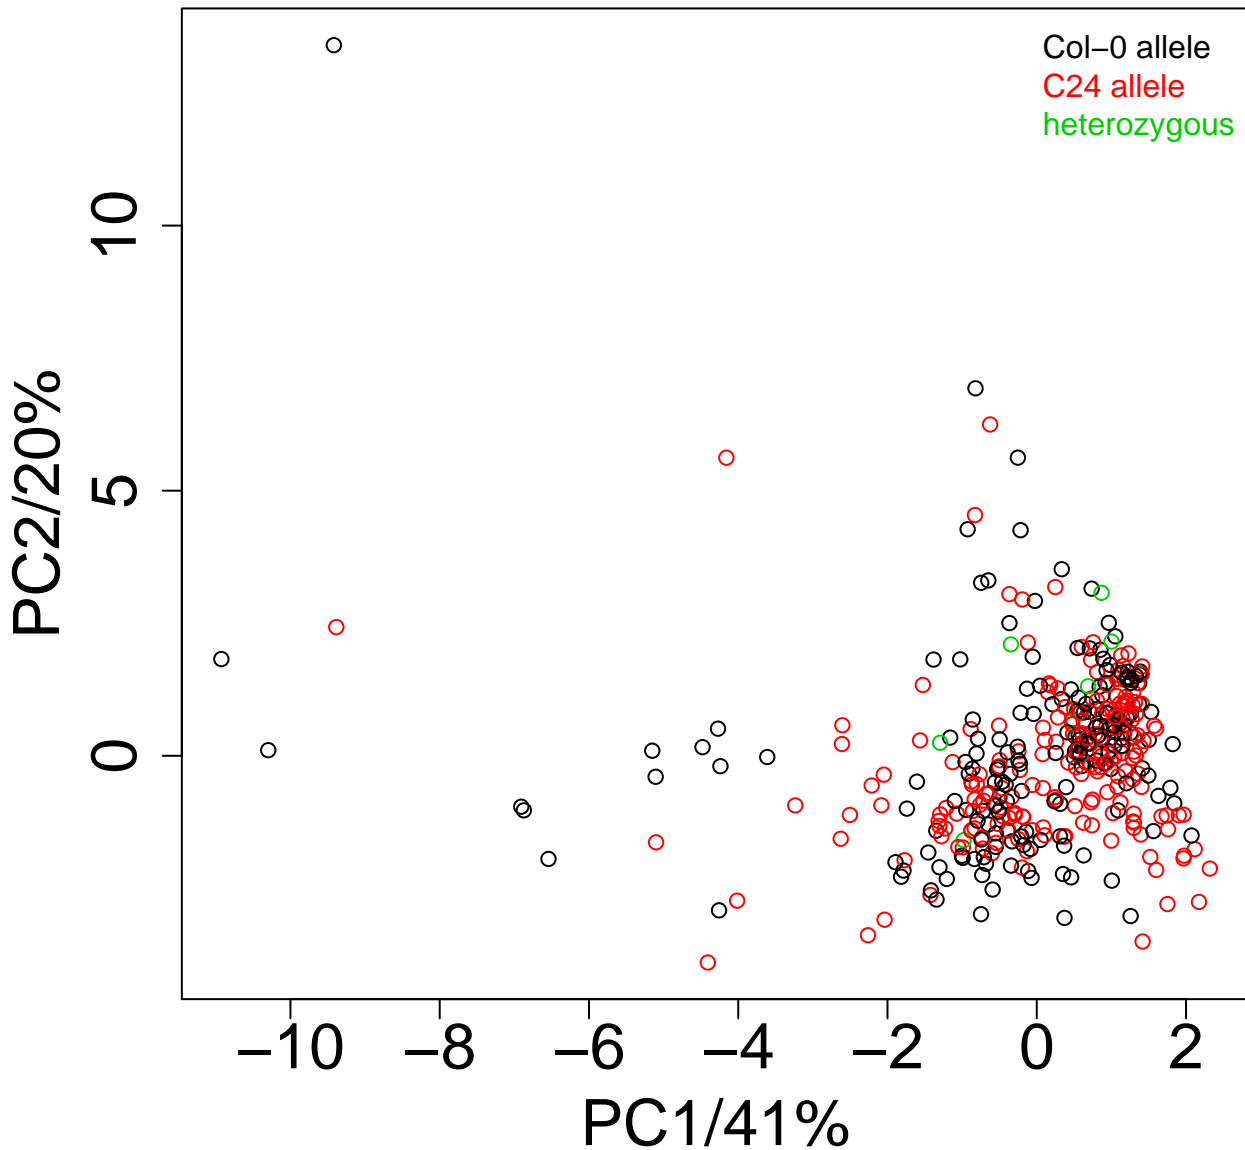

Chr. 2 Pos. 38.3 / MASC02644

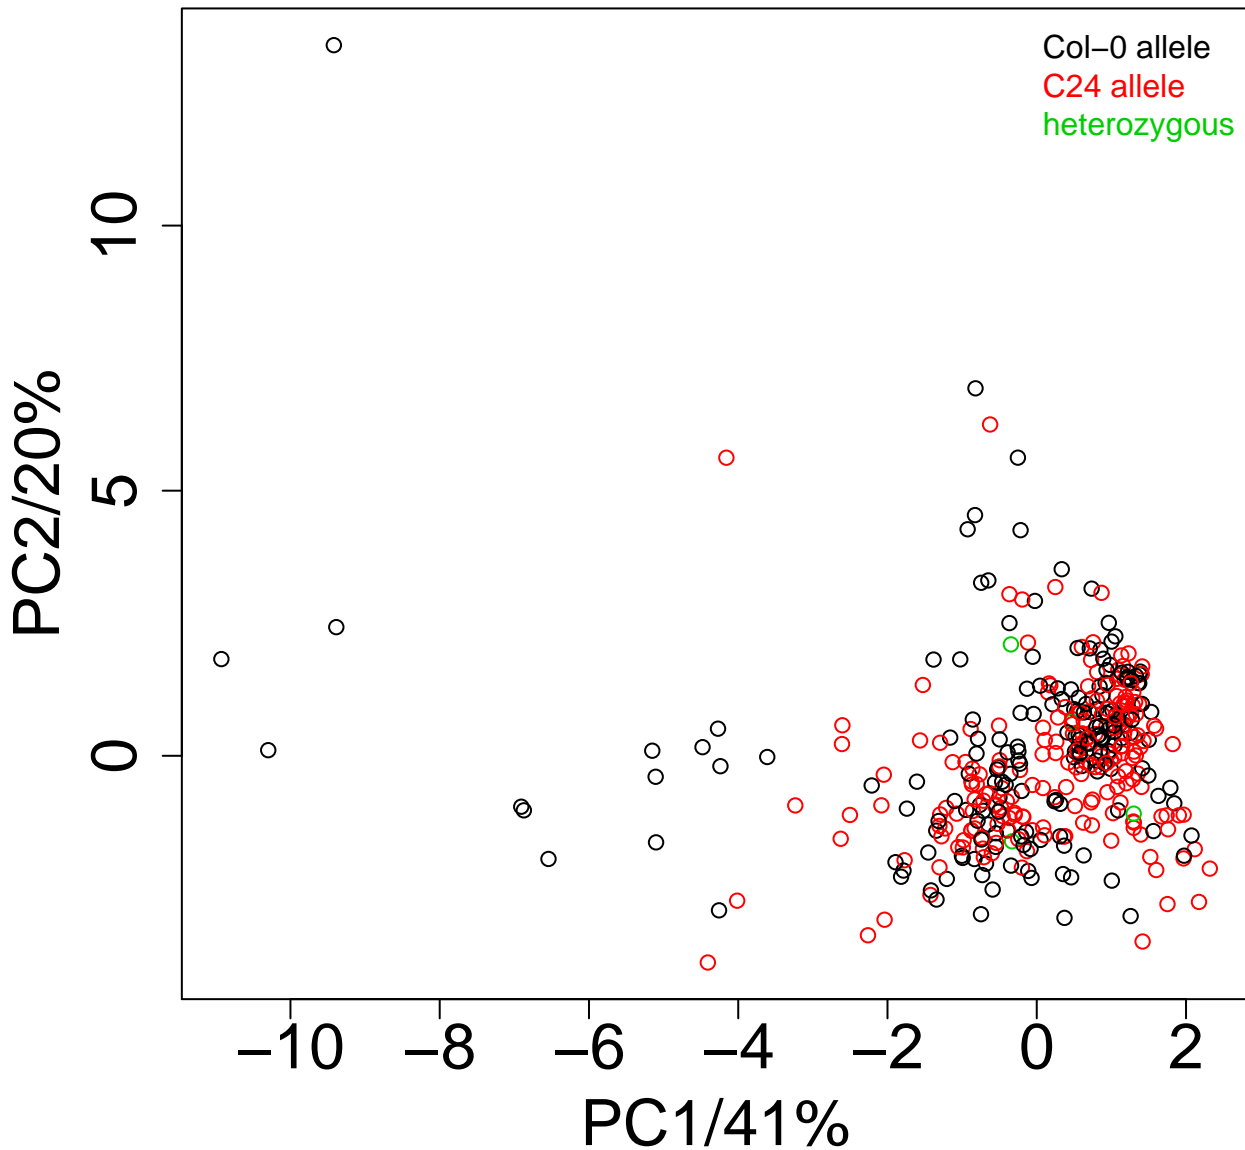



Chr. 2 Pos. 41.4 / MASC09221

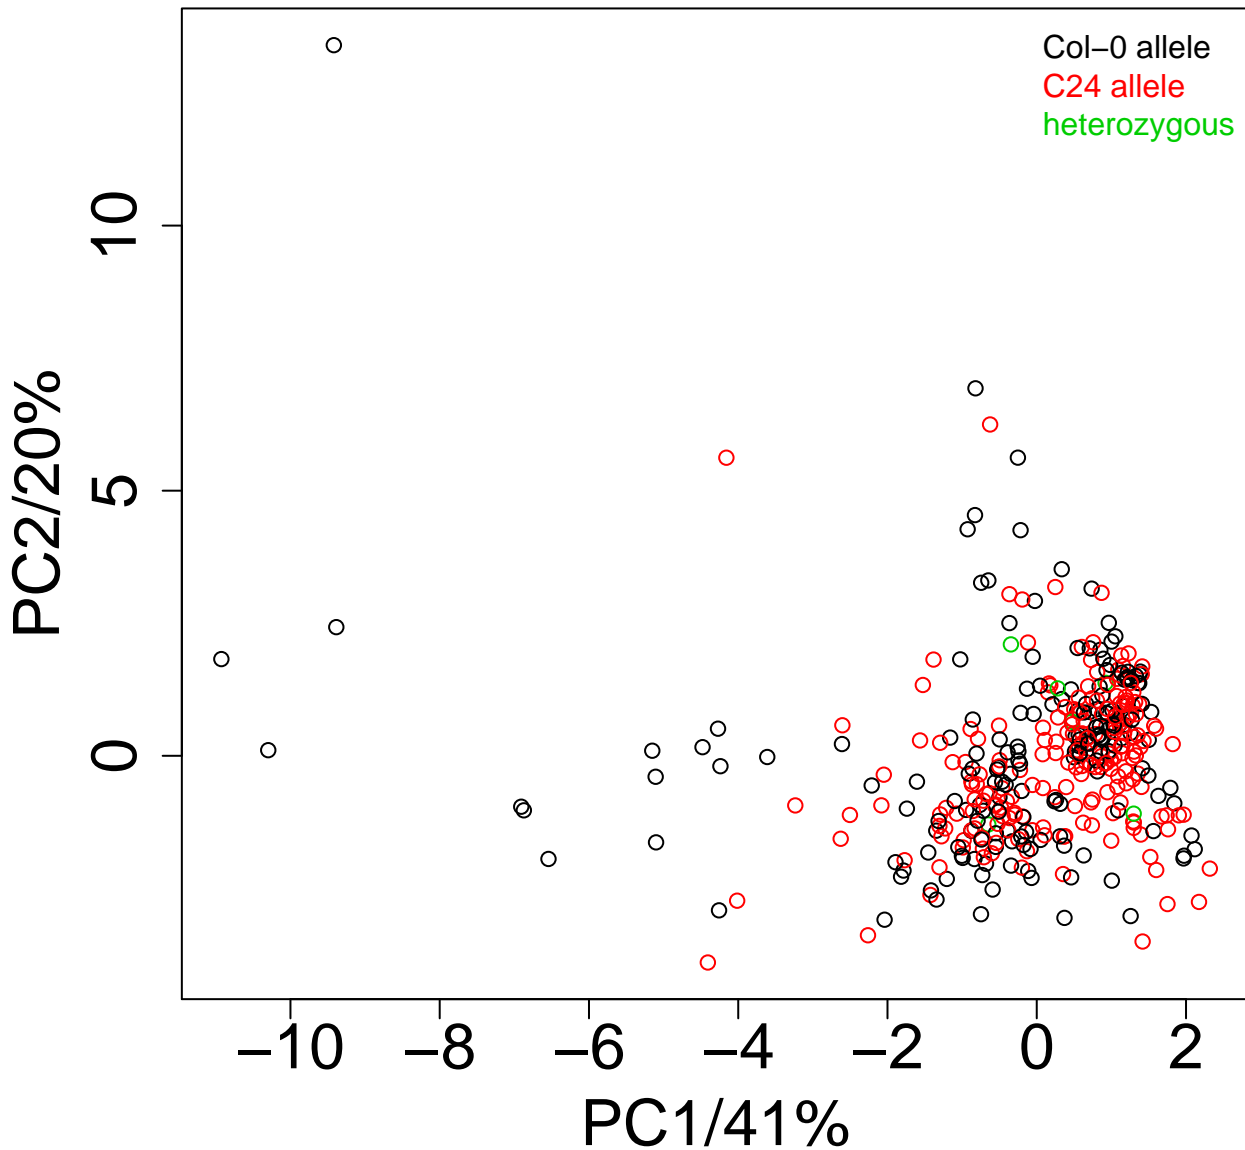

Chr. 2 Pos. 42.1 / nga1126

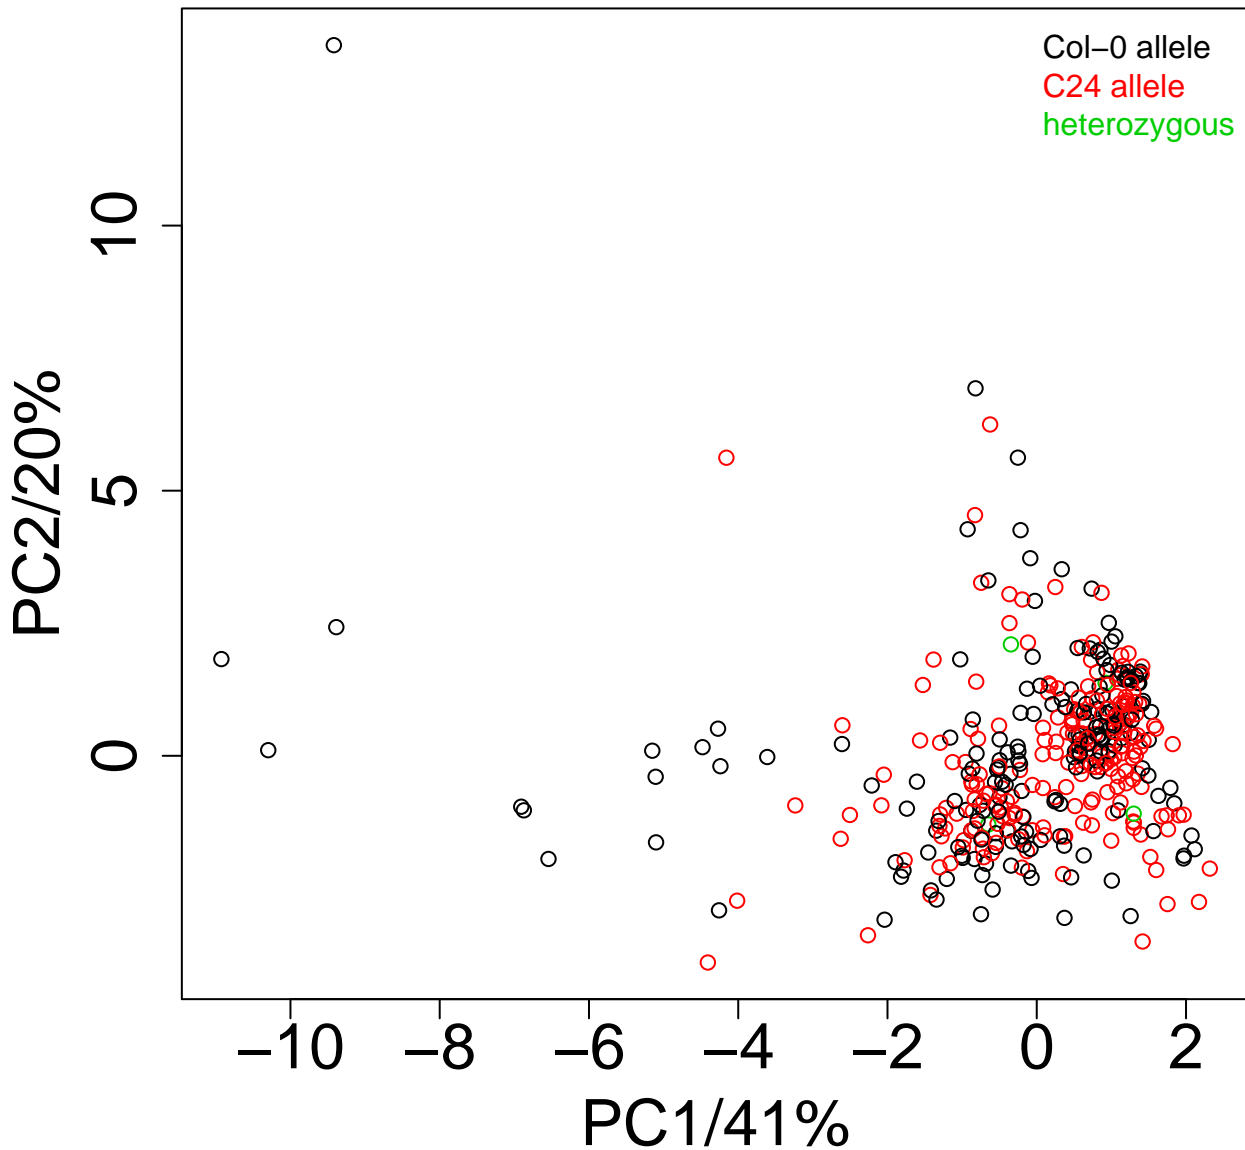

Chr. 2 Pos. 46.9 / MASC06104

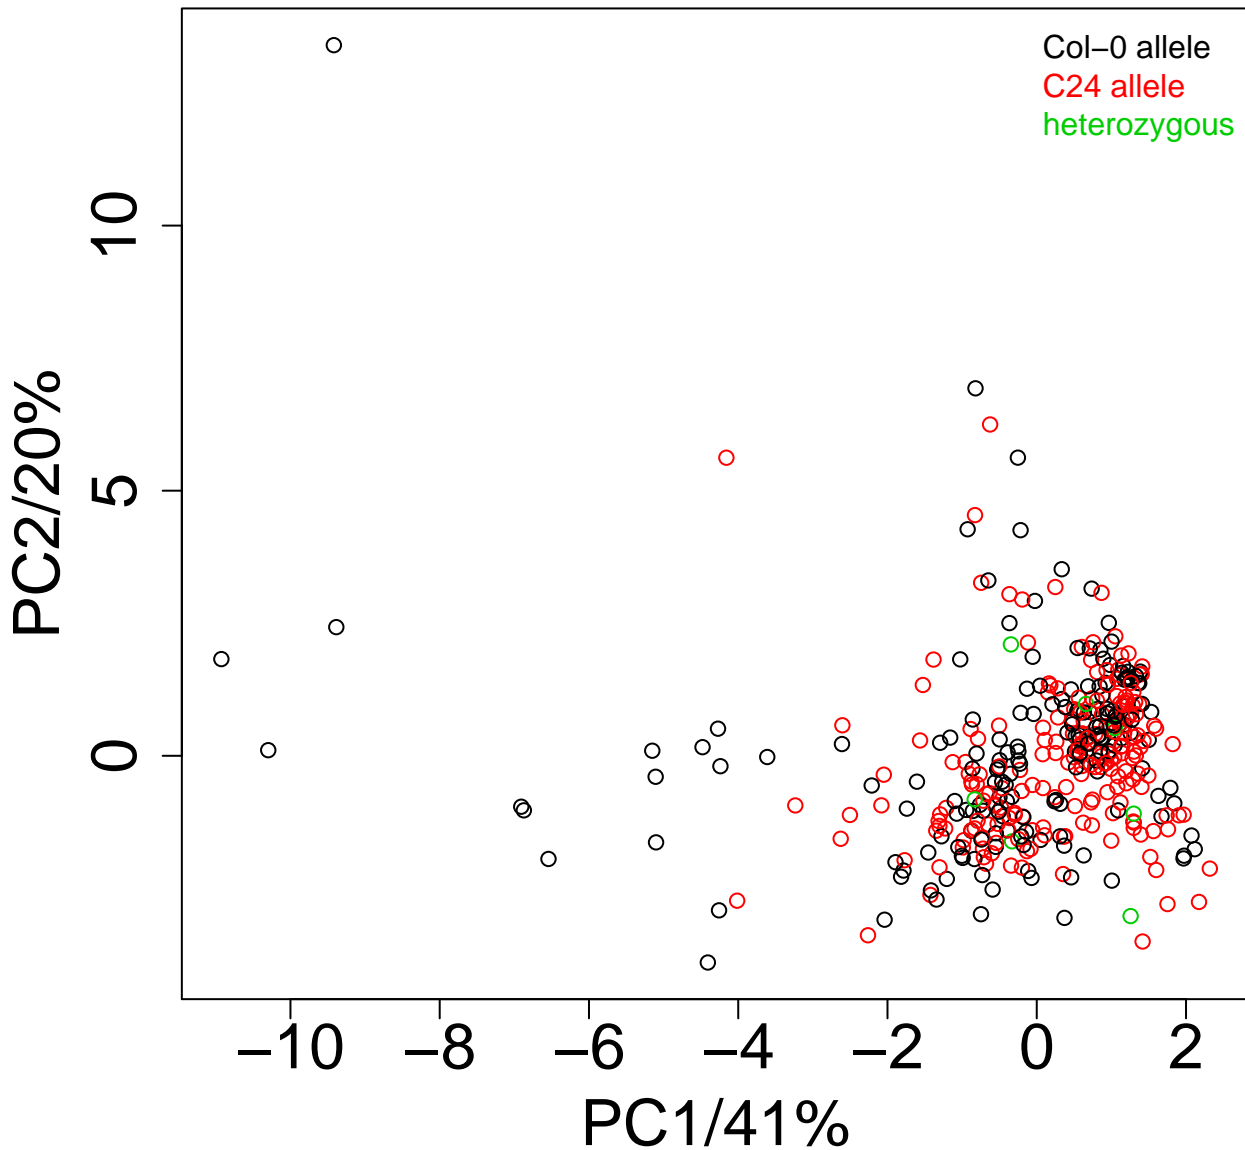

Chr. 2 Pos. 50.6 / MASC05434

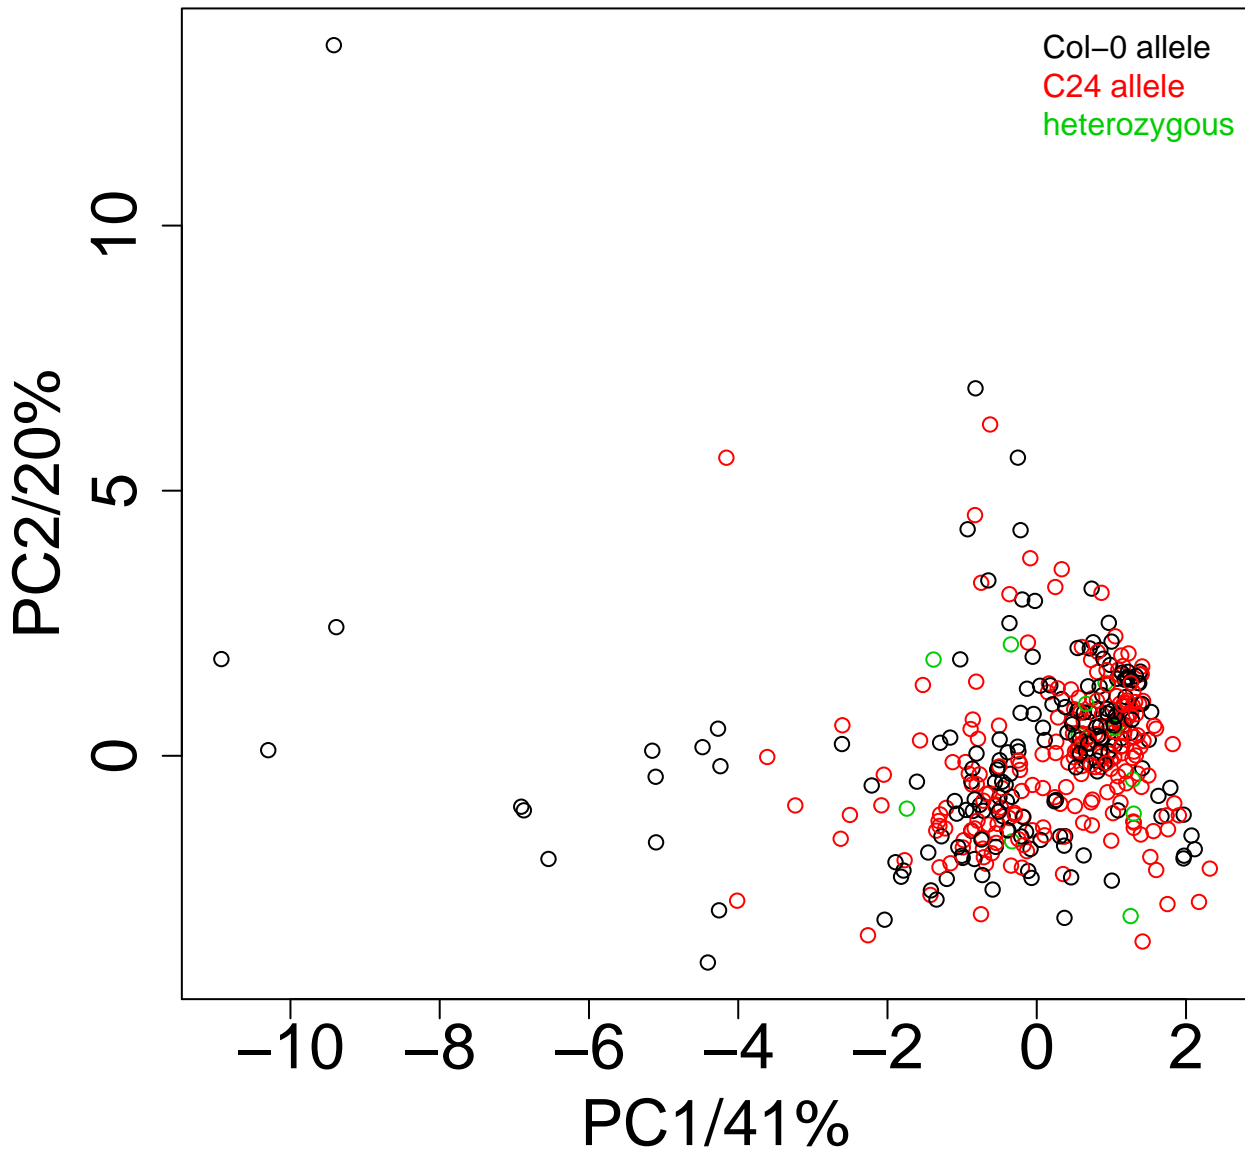

Chr. 2 Pos. 53.1 / MASC09222

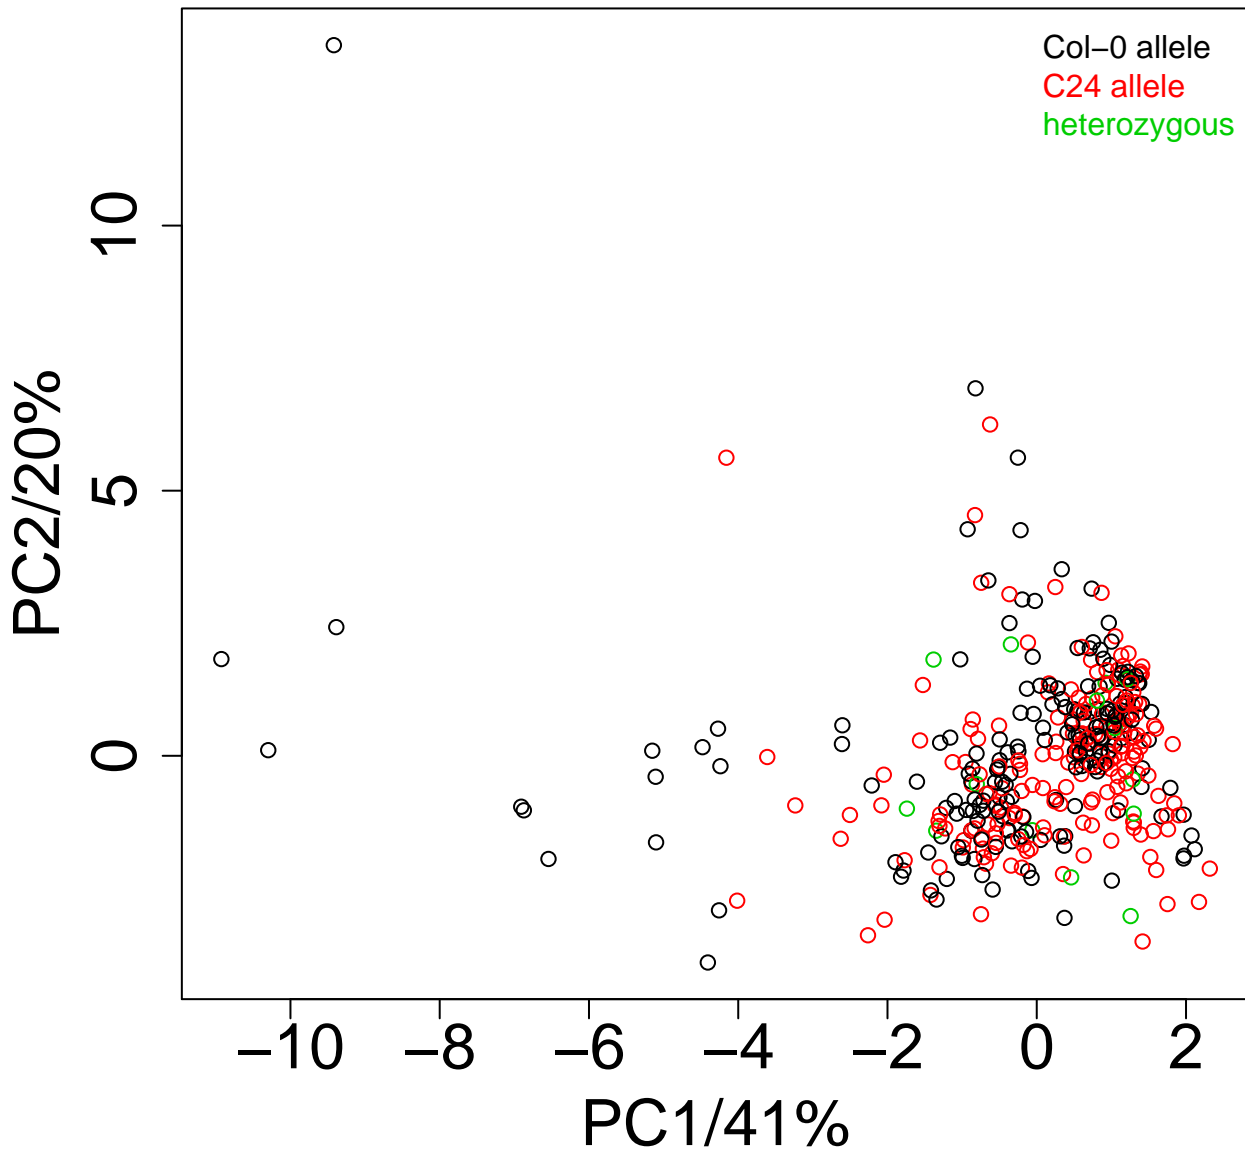

Chr. 2 Pos. 58.8 / MASC05386

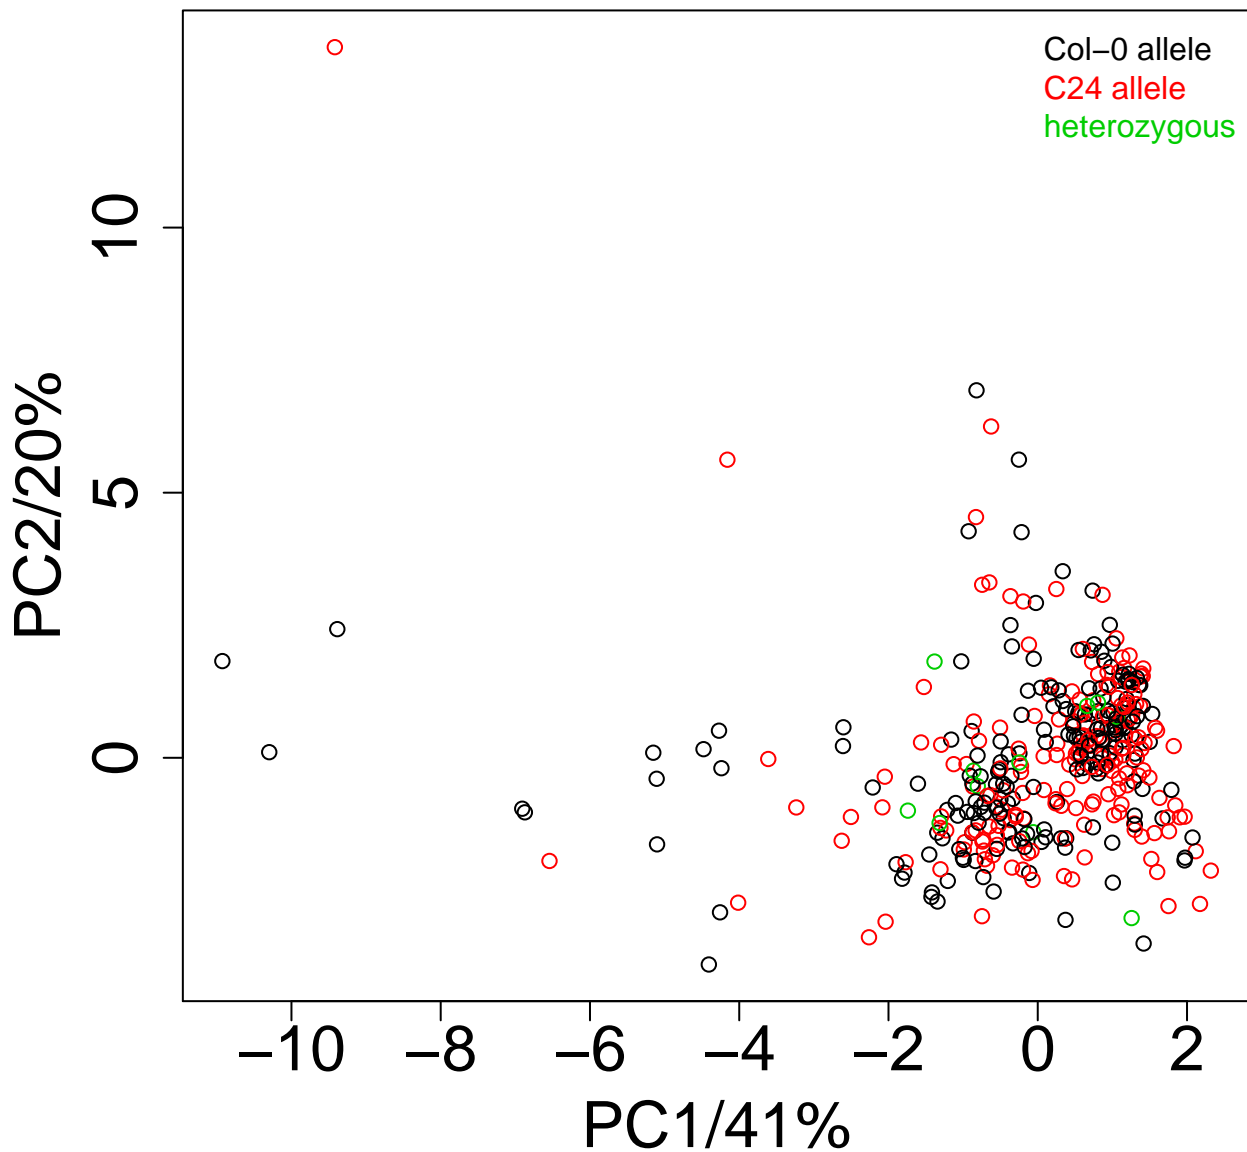

Chr. 2 Pos. 62 / MASC06025

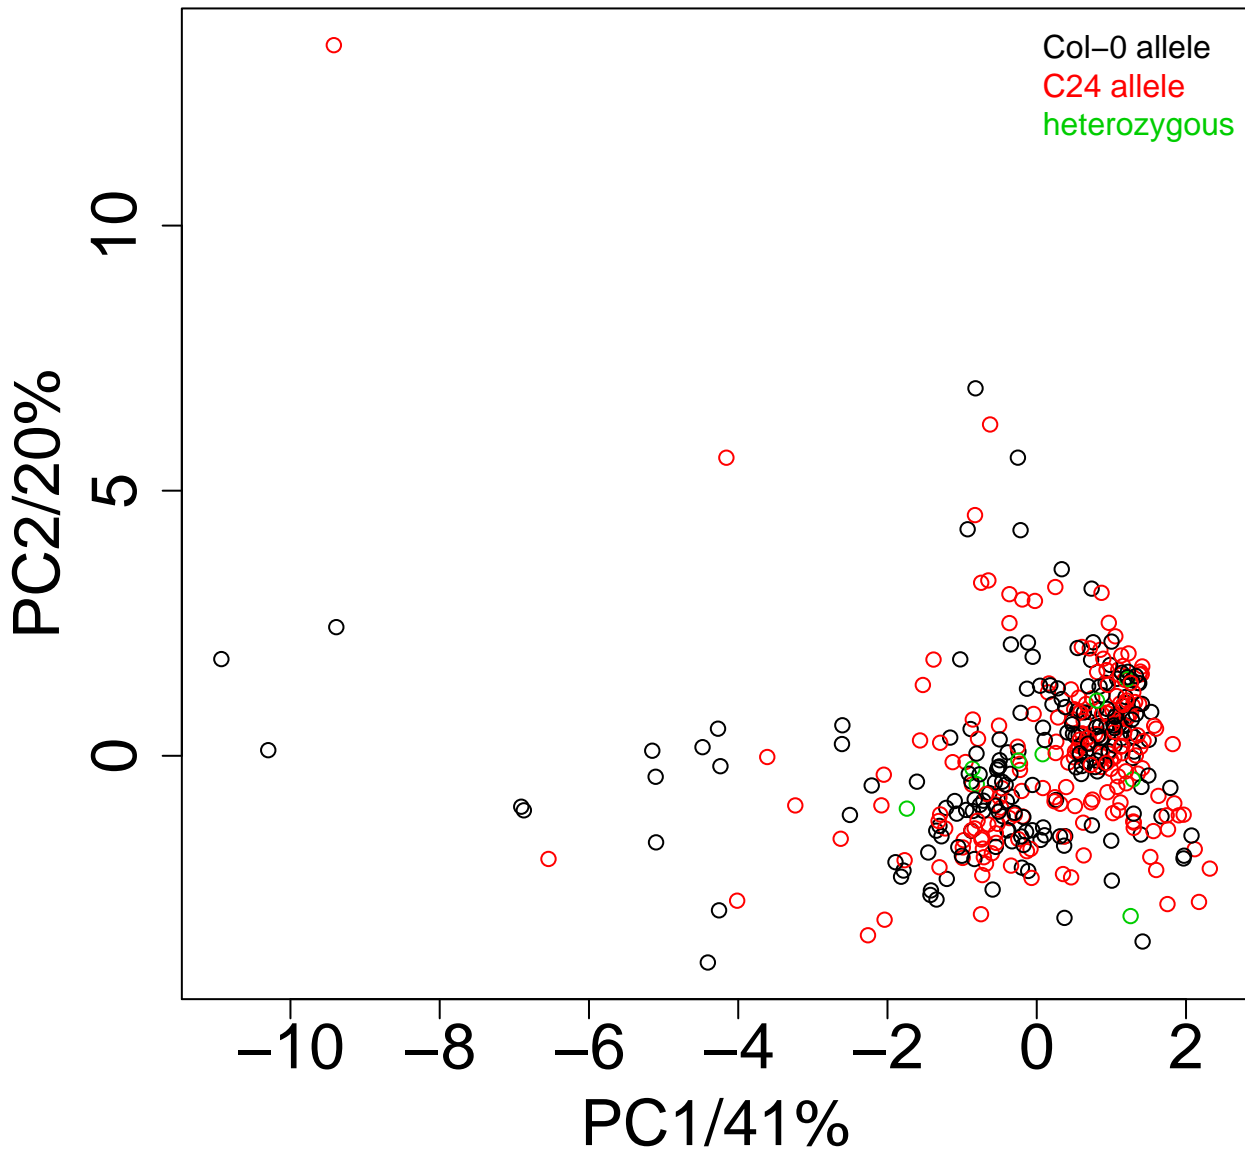

Chr. 2 Pos. 66.5 / MASC00371

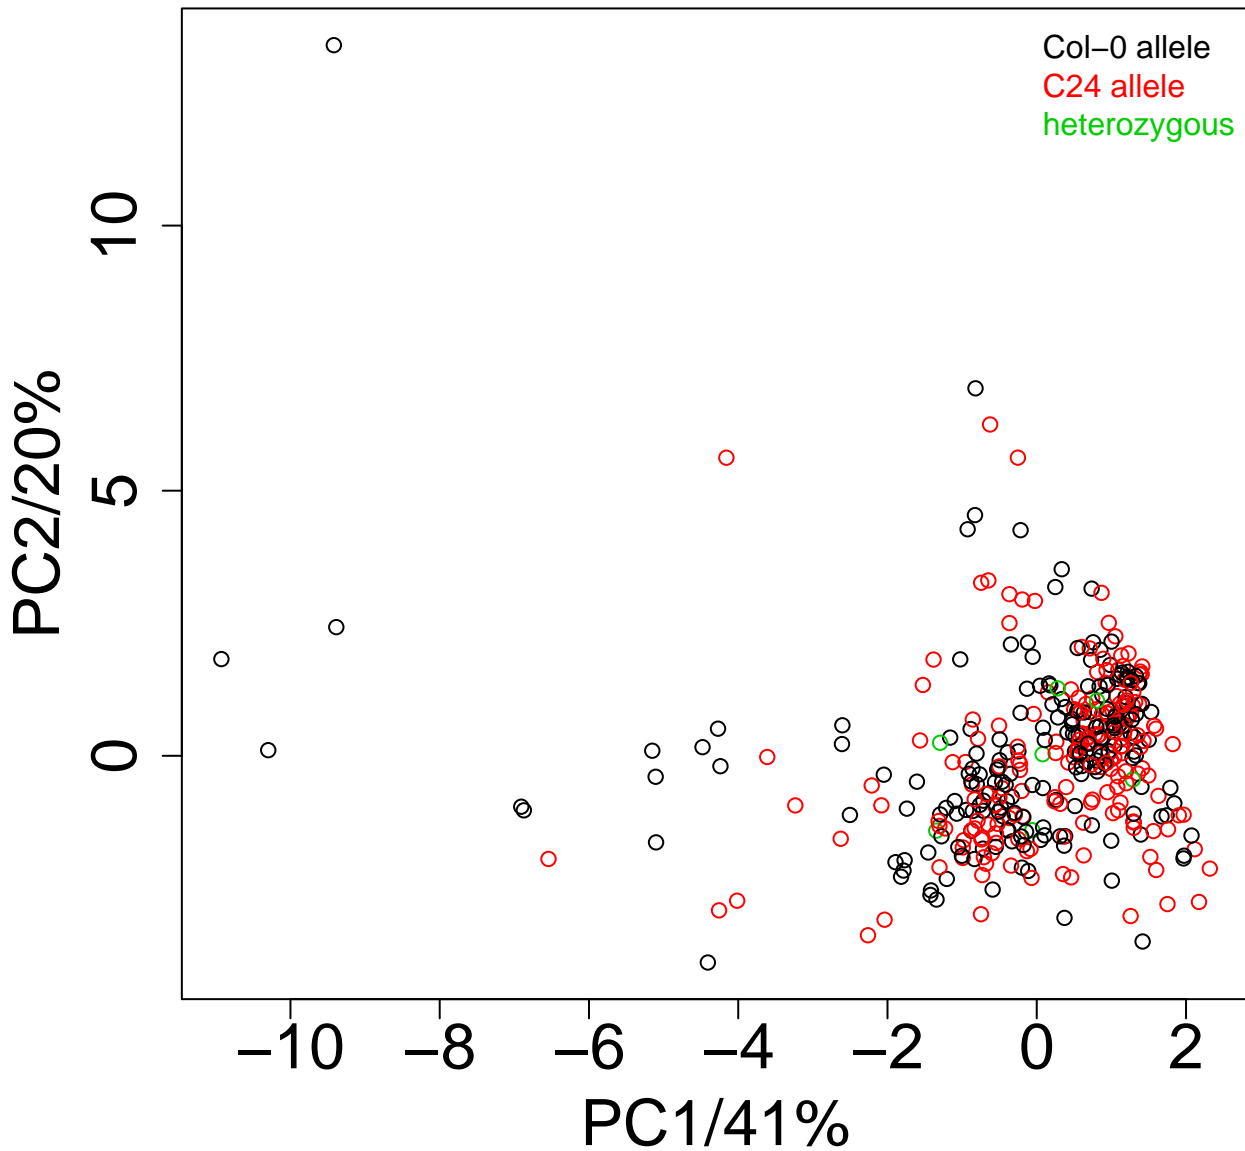





Chr. 2 Pos. 69.2 / MASC02812

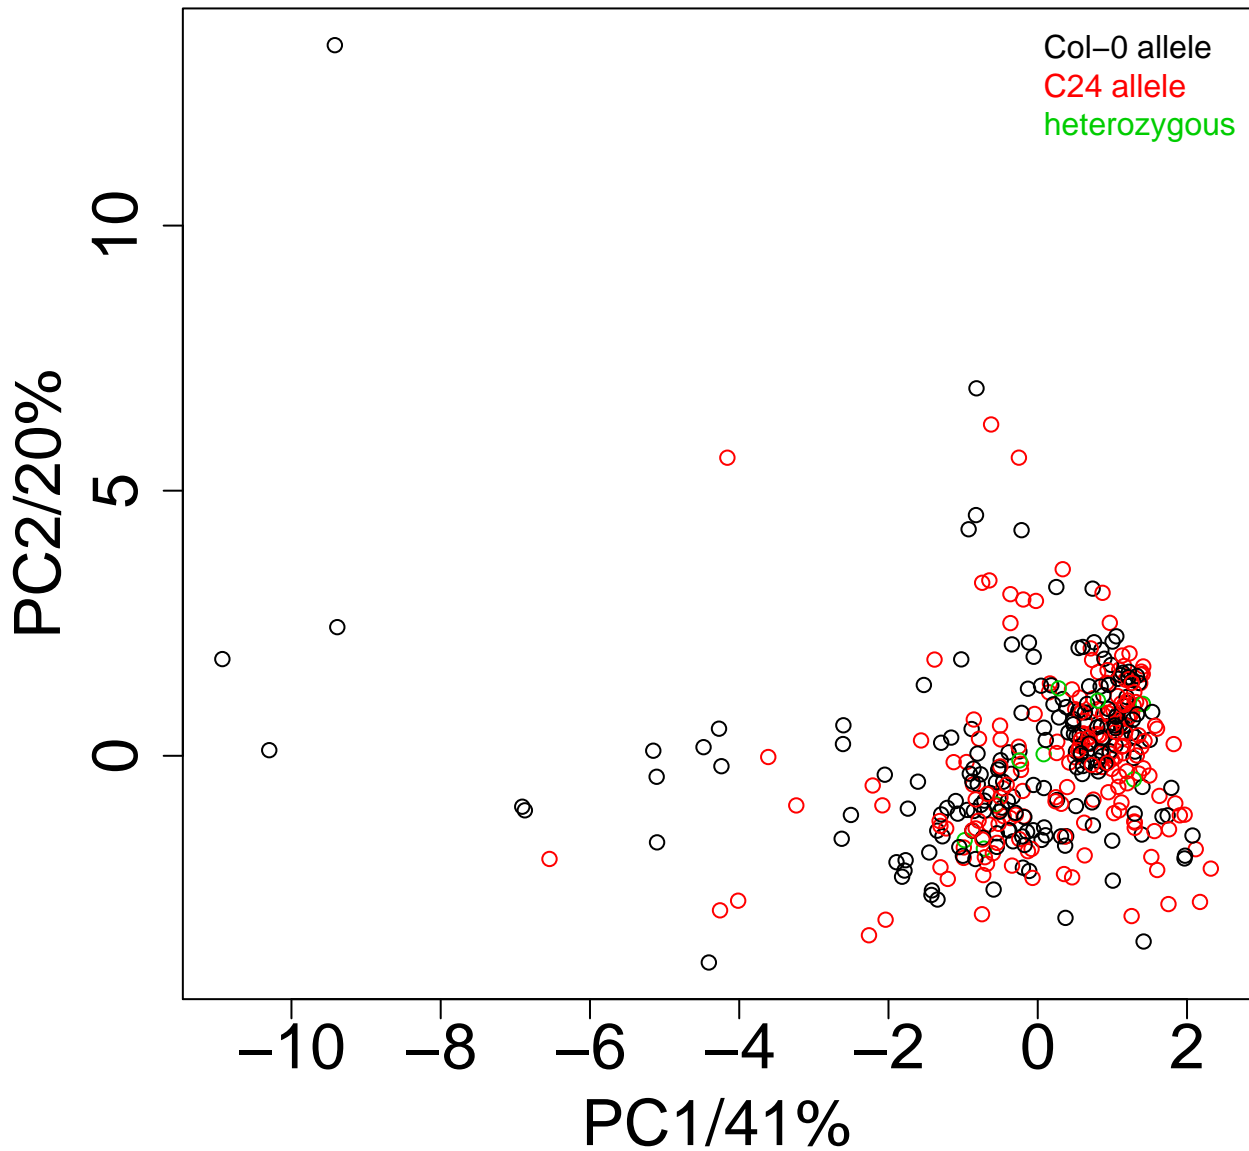

Chr. 3 Pos. 0 / M3\_0089

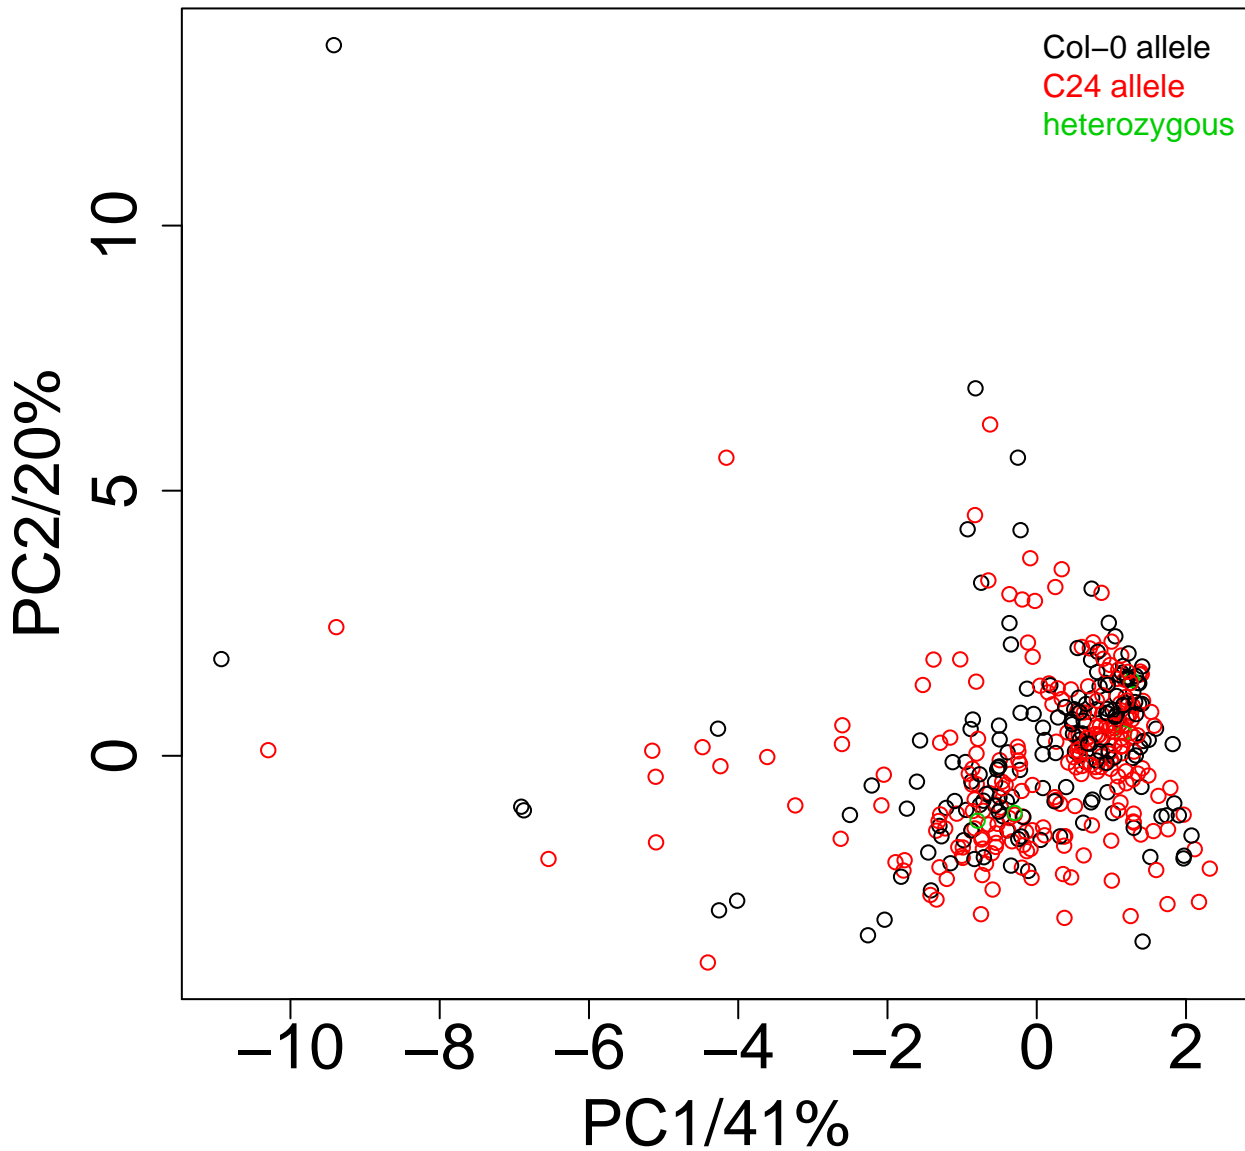

Chr. 3 Pos. 0.2 / MASC03898

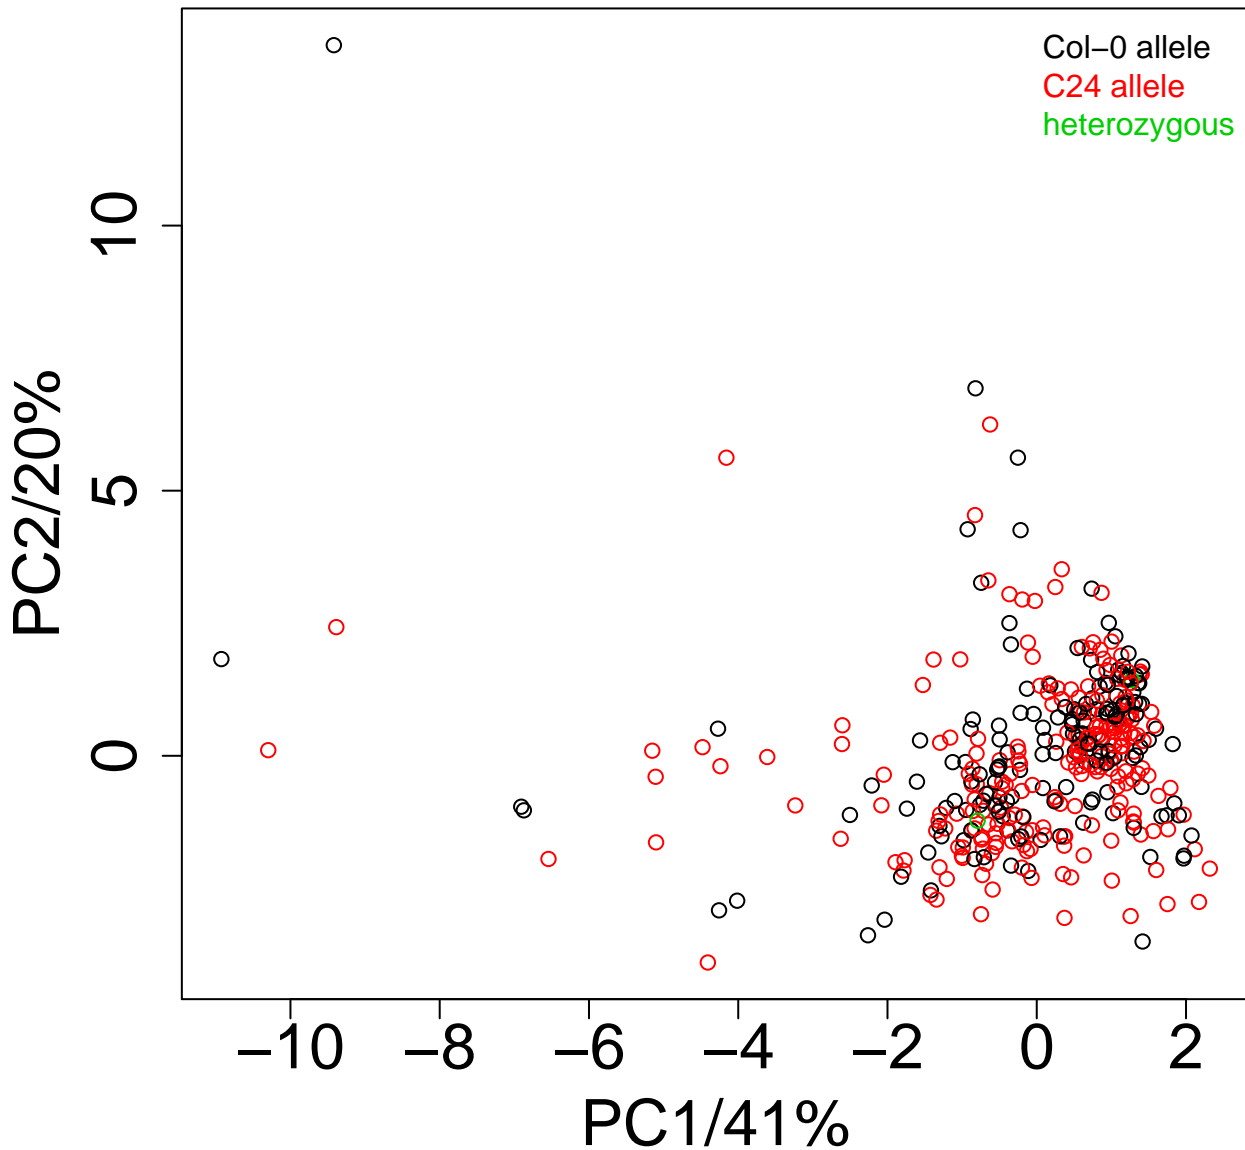

Chr. 3 Pos. 1.4 / nga172

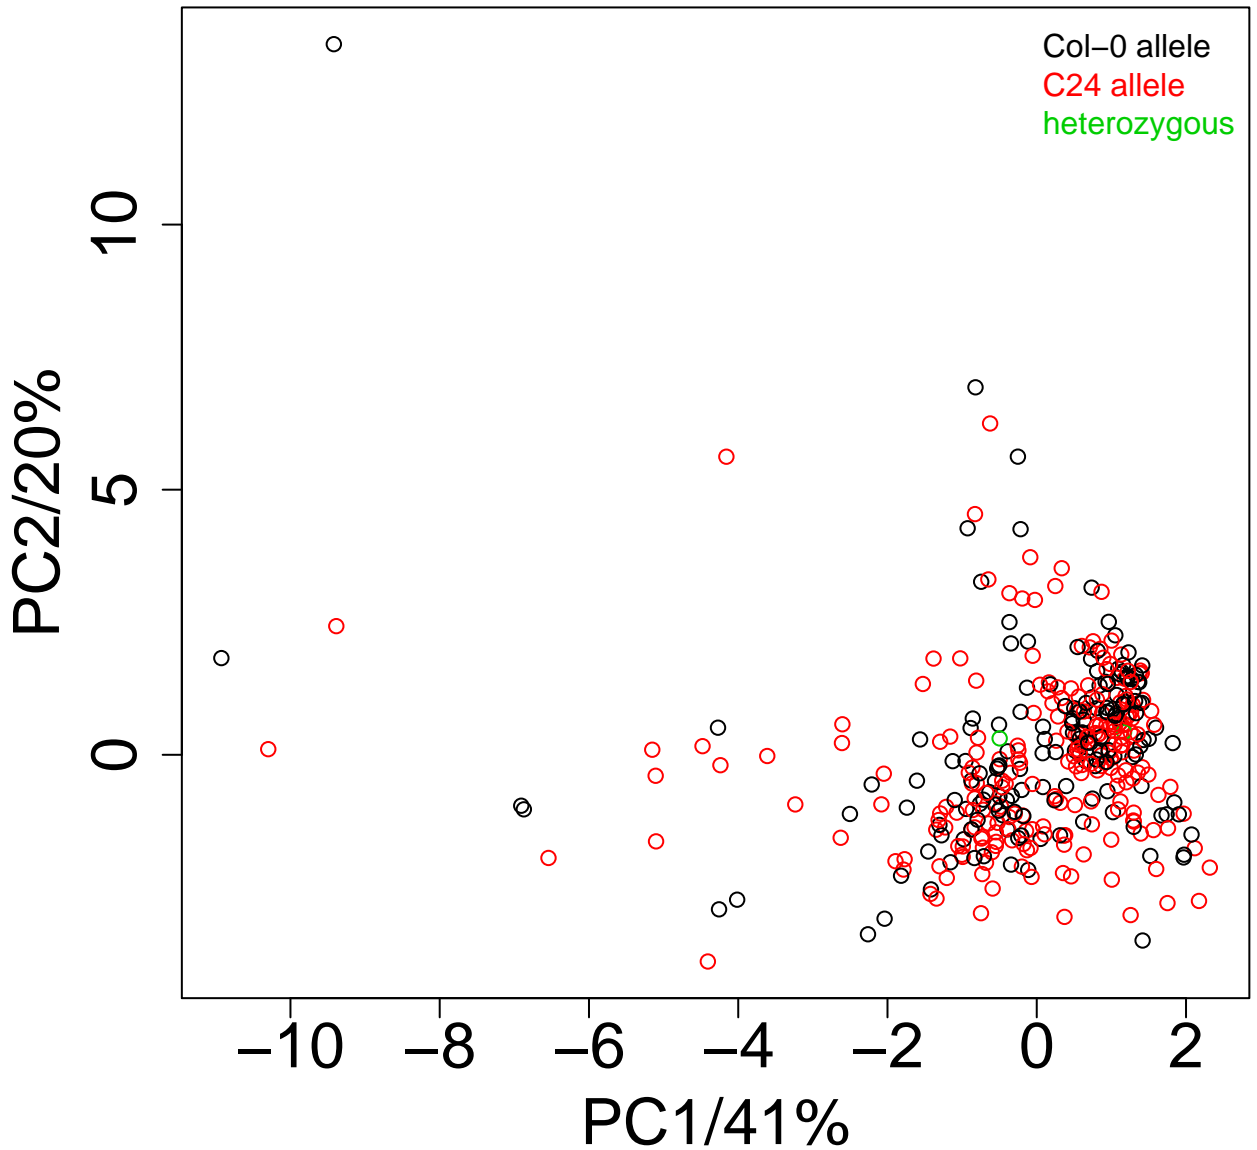

Chr. 3 Pos. 1.4 / MASC03001

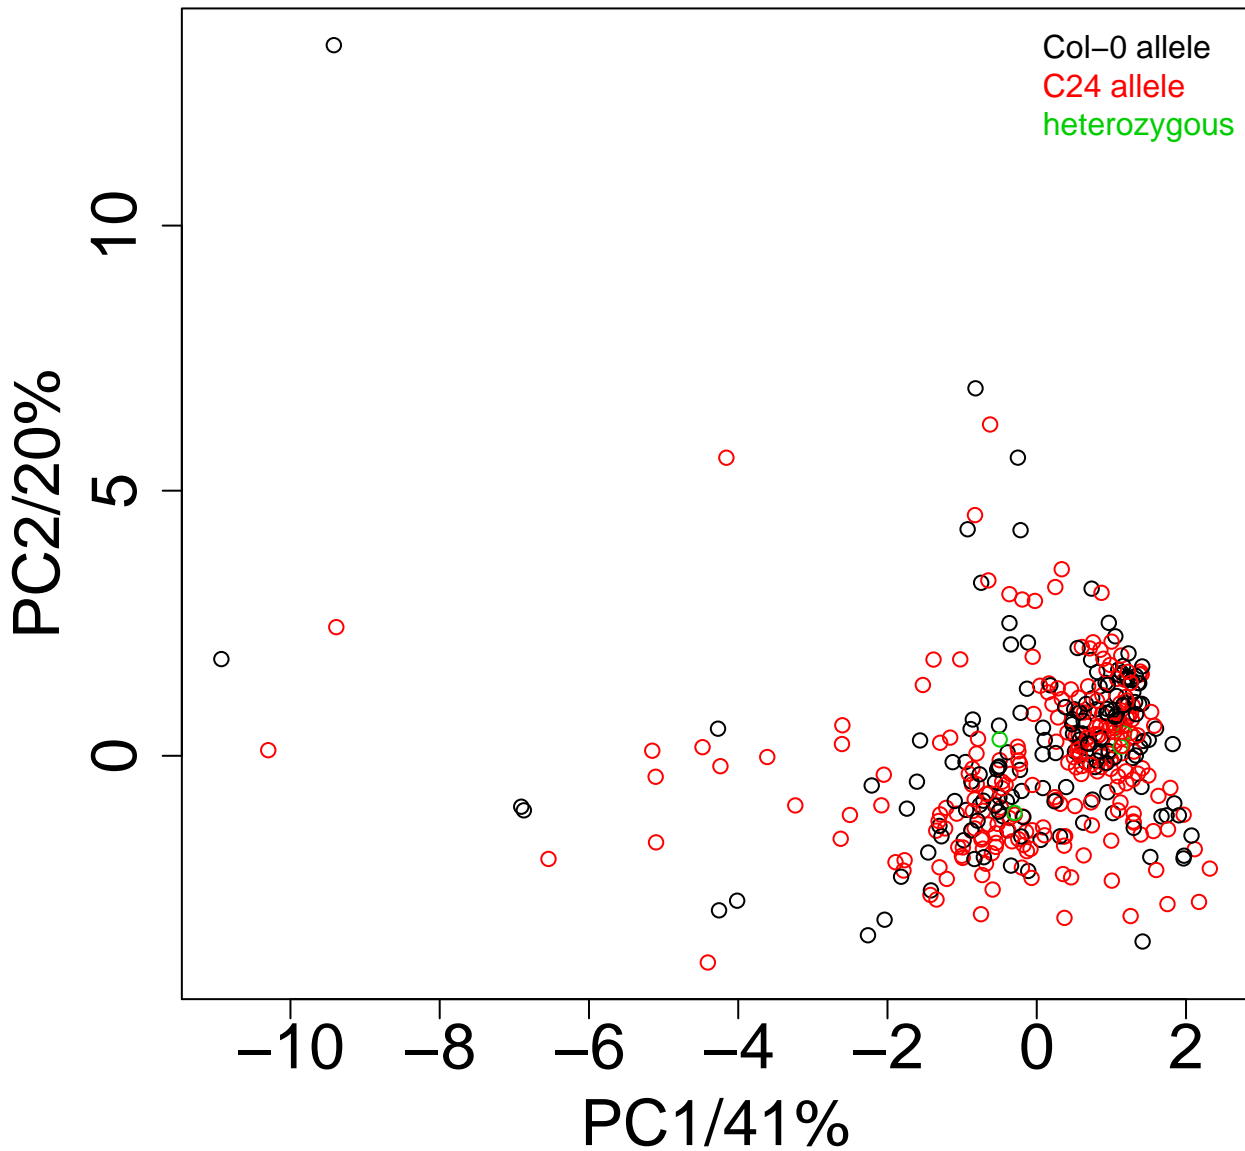

Chr. 3 Pos. 4.9 / MASC05312

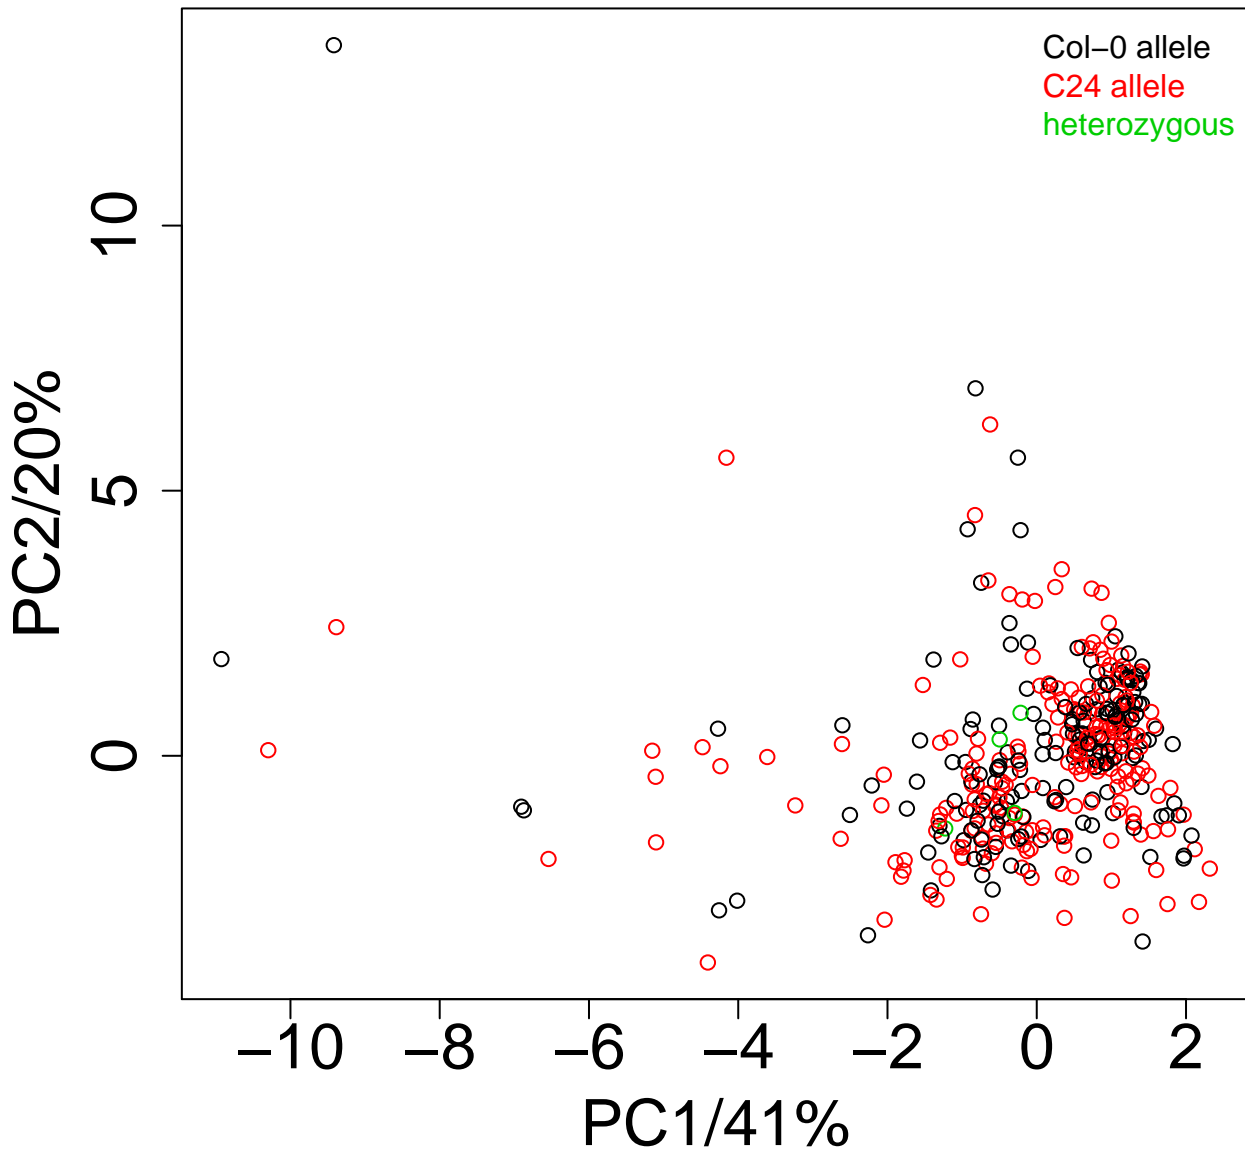

Chr. 3 Pos. 9.1 / F9F8ID

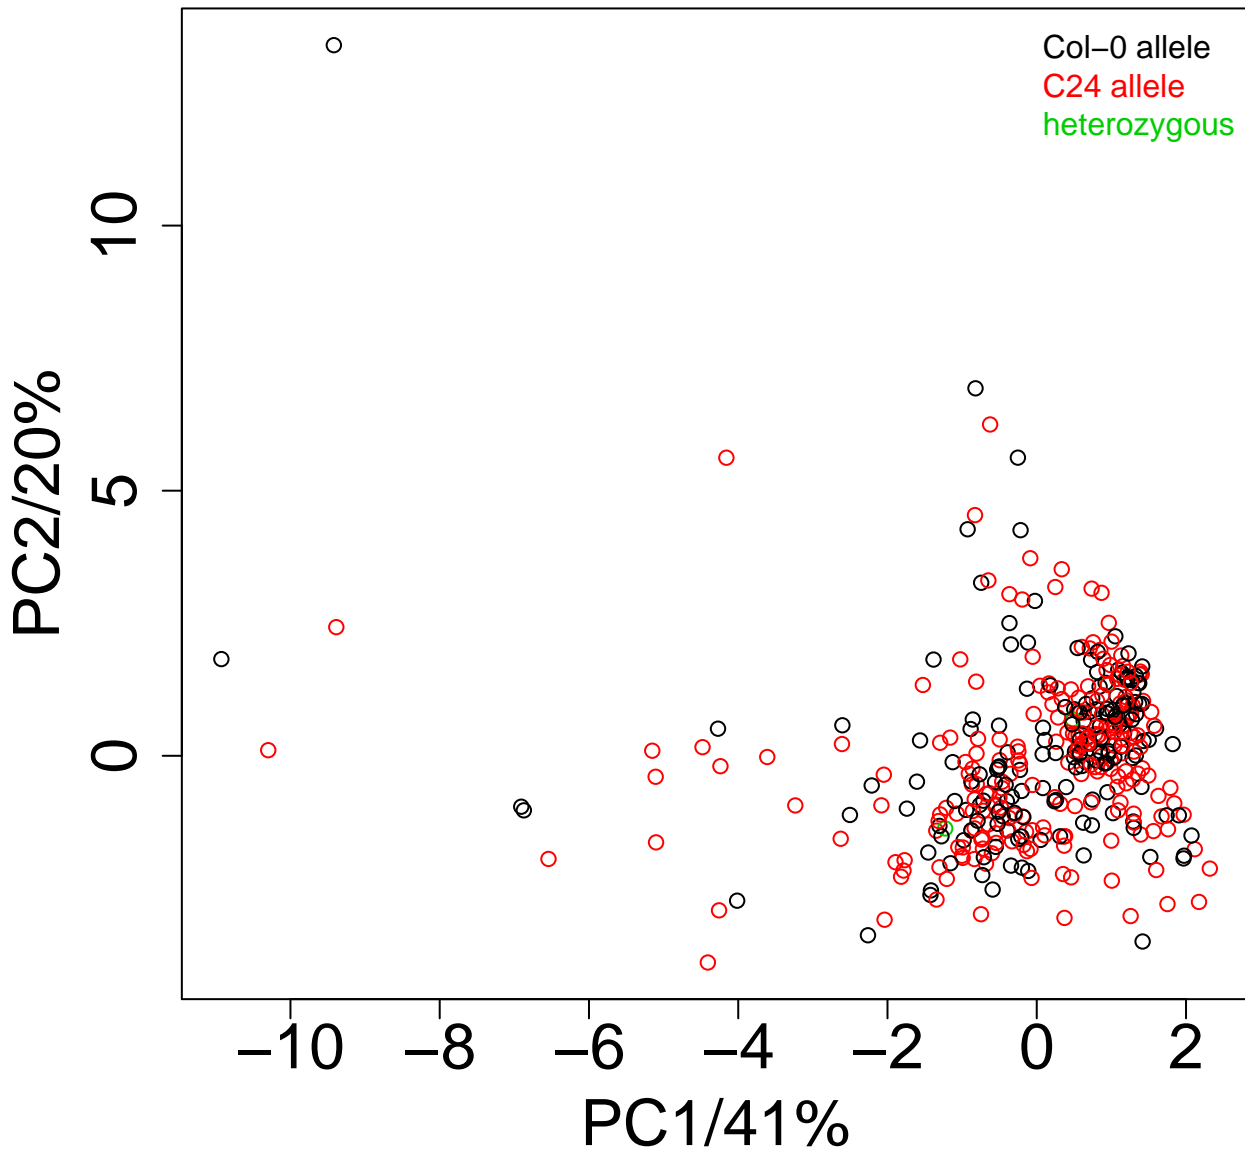



Chr. 3 Pos. 12 / MASC02947

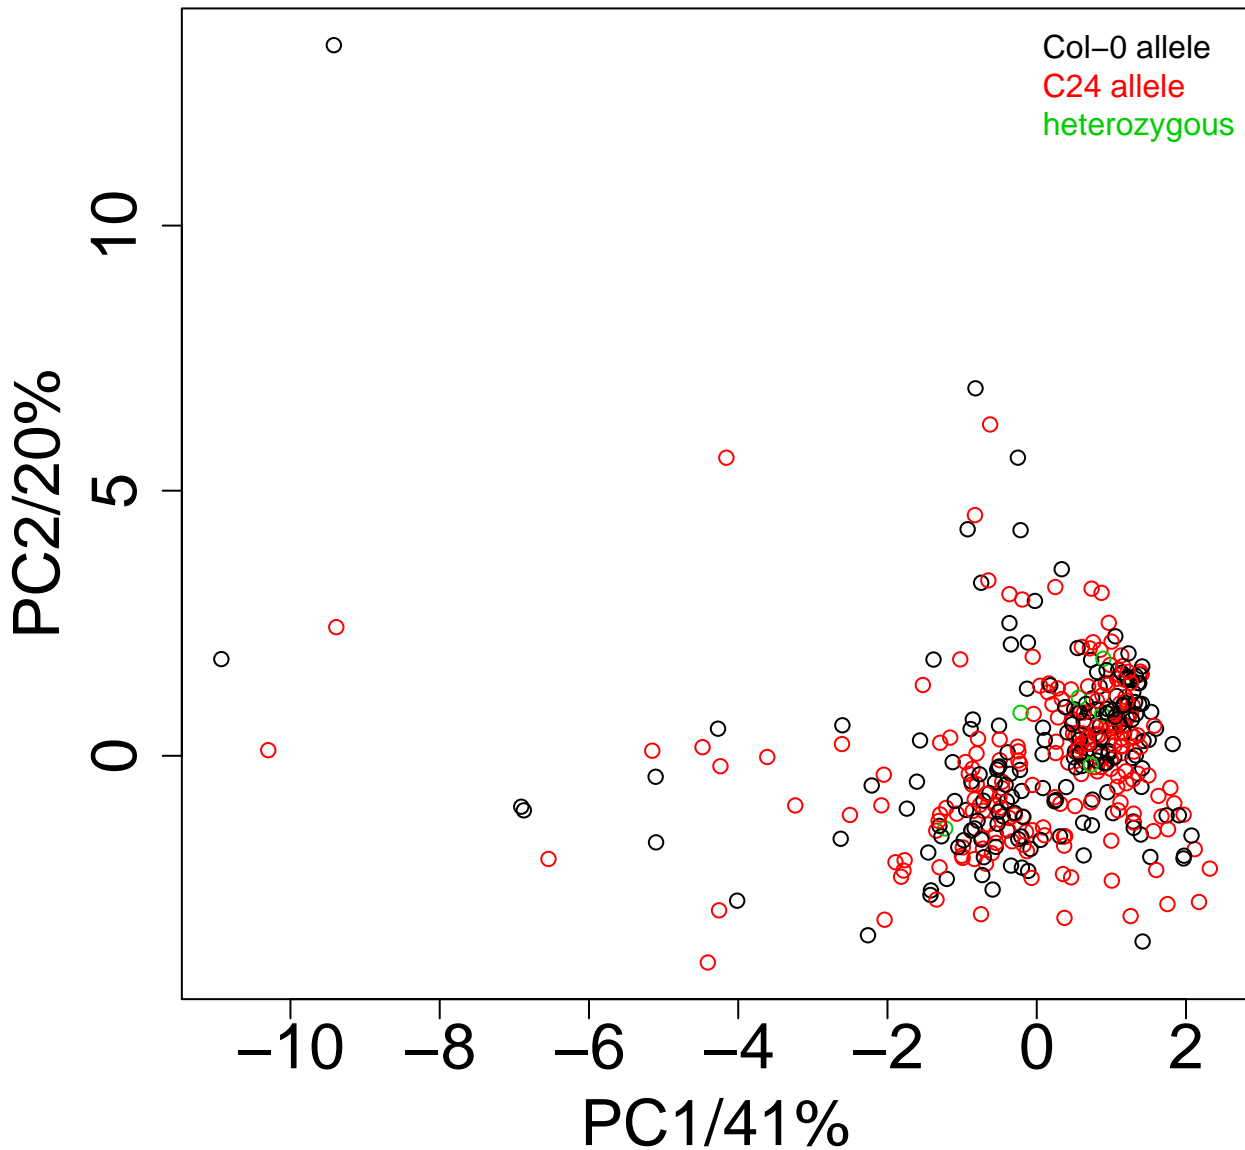

Chr. 3 Pos. 15.7 / MASC04608

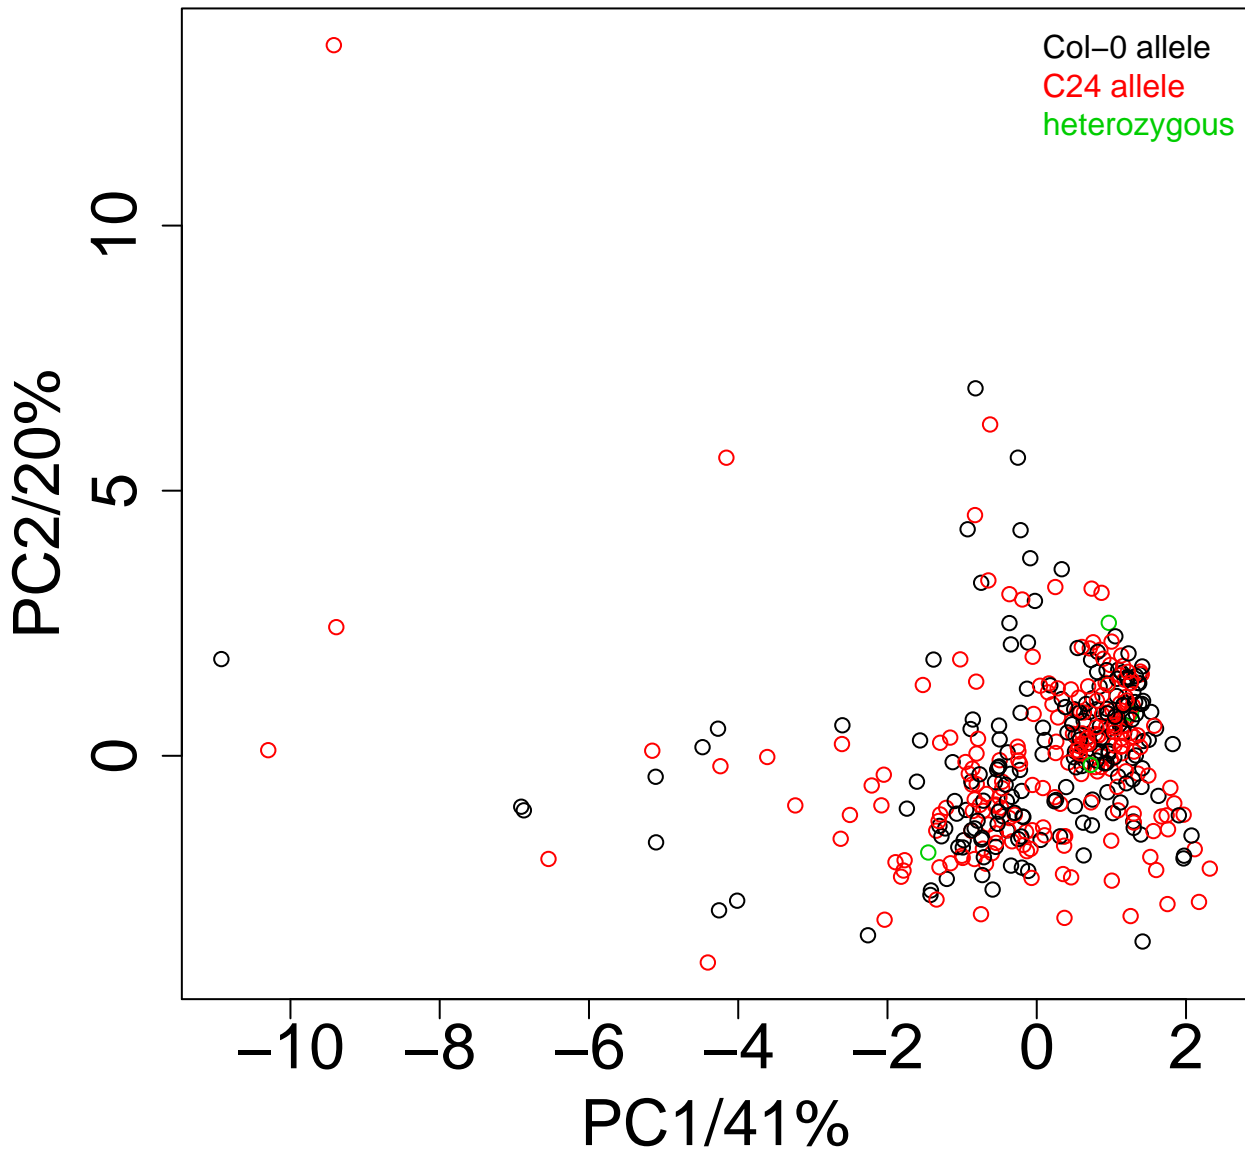

Chr. 3 Pos. 17.7 / MASC04279

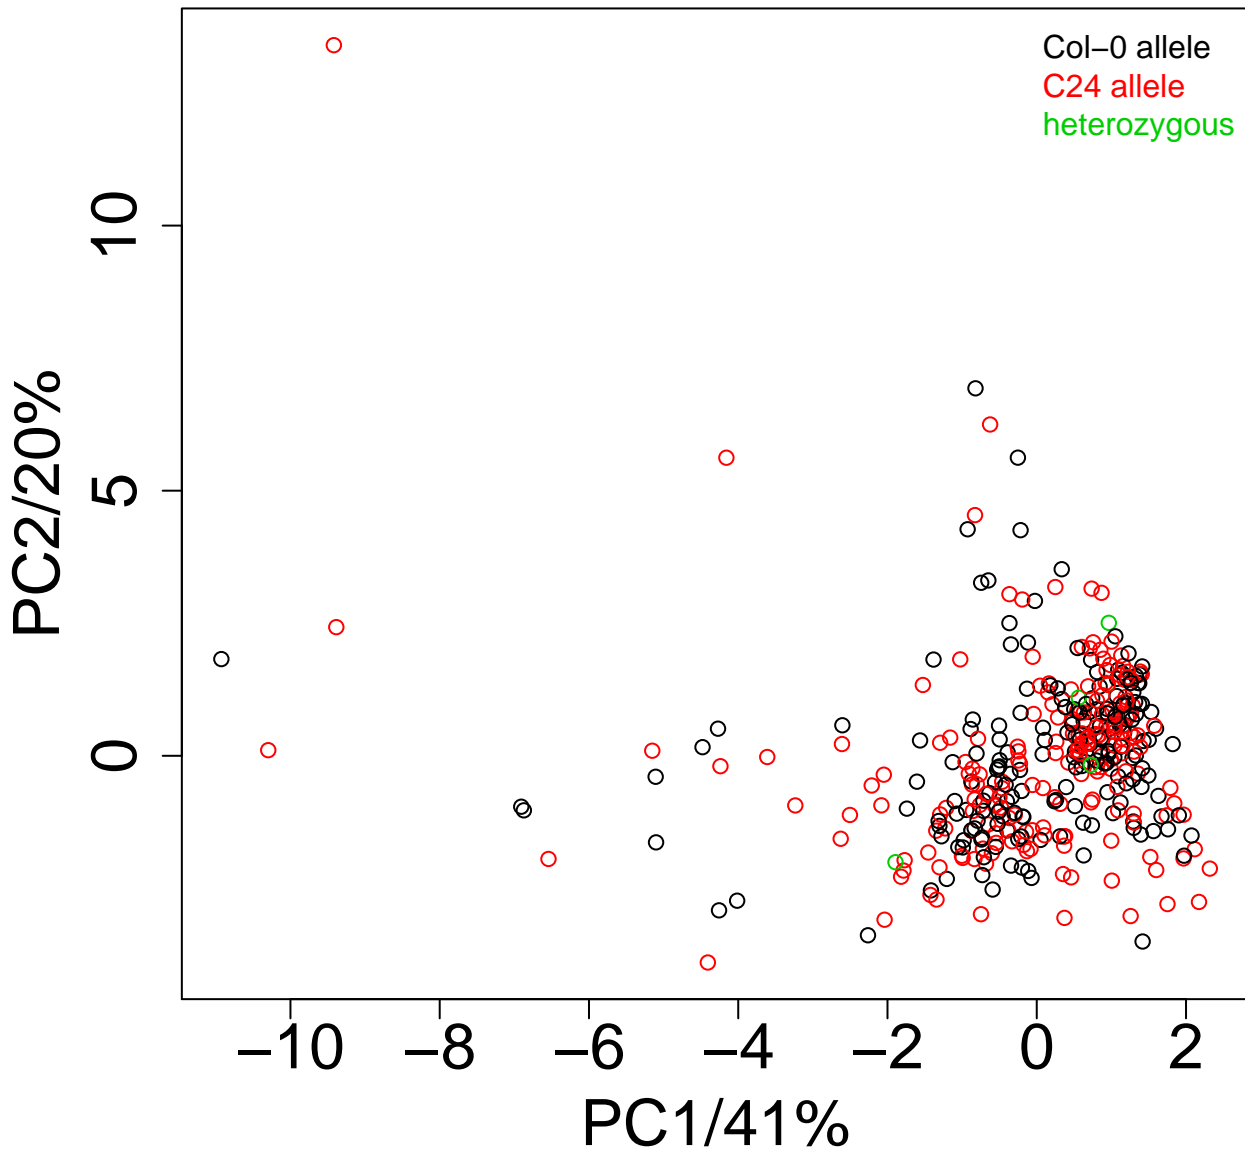

Chr. 3 Pos. 21.1 / MASC02841

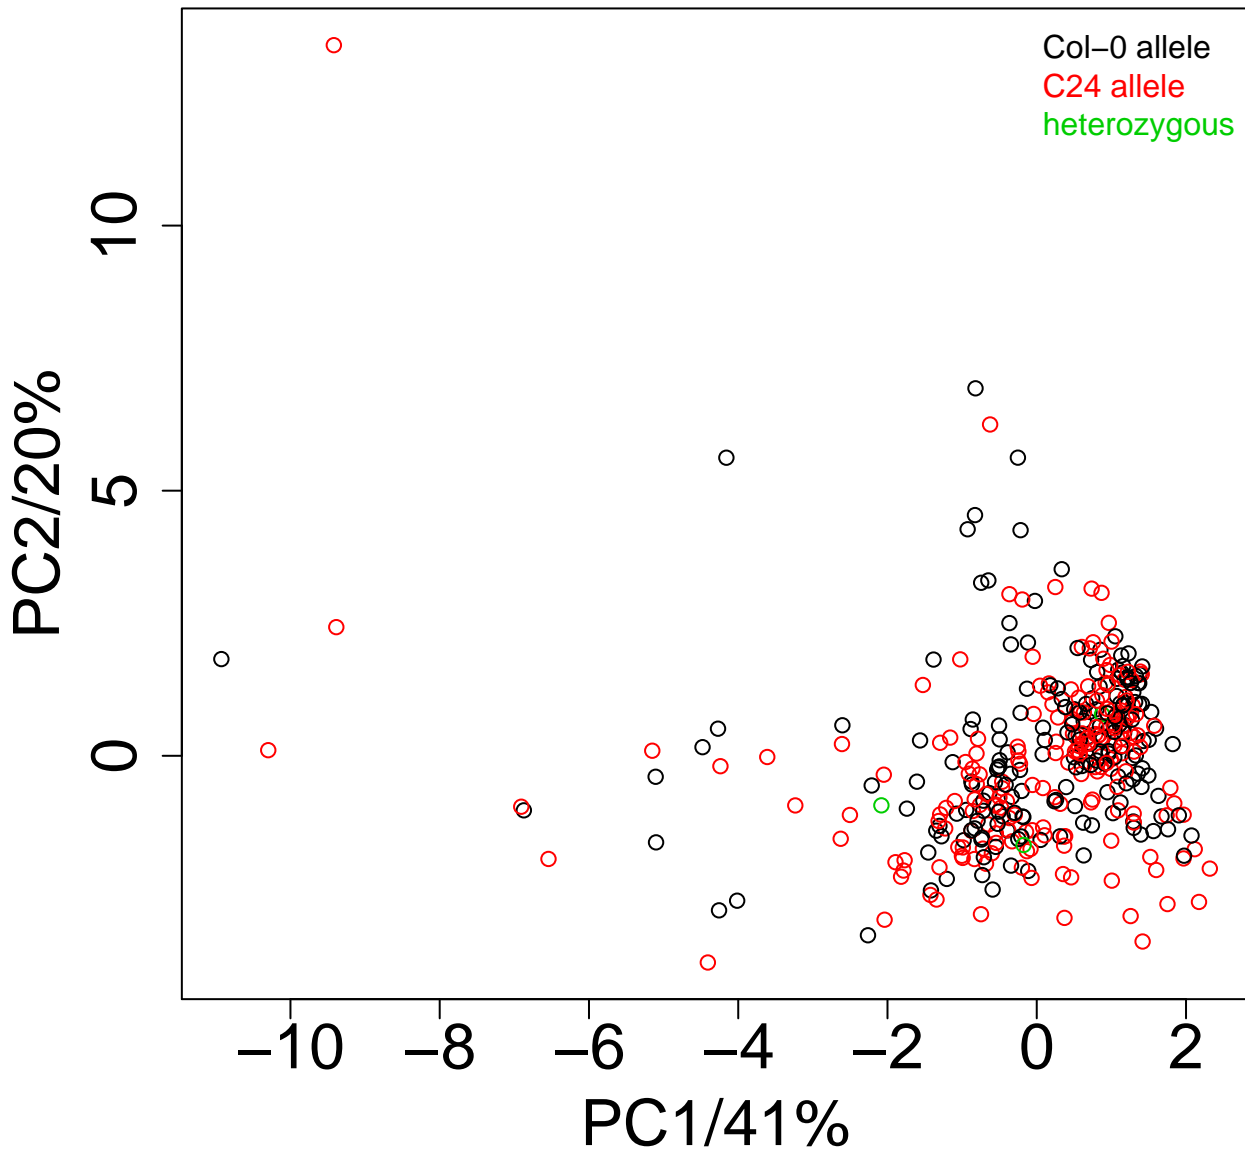

Chr. 3 Pos. 27.5 / MSAT3.19

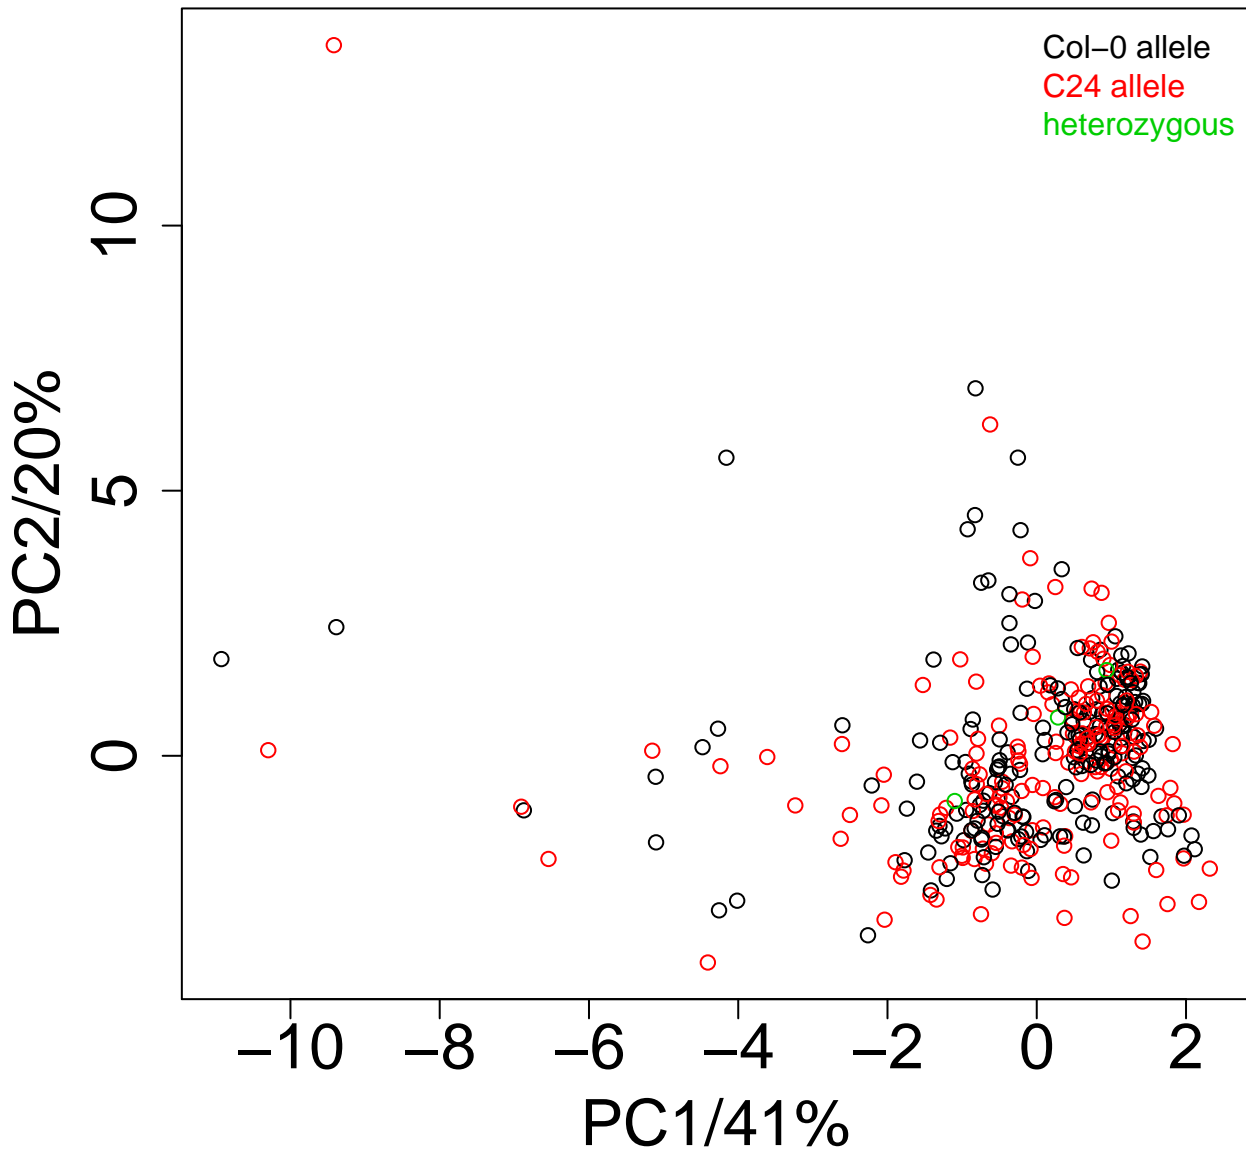

Chr. 3 Pos. 28 / MASC04516

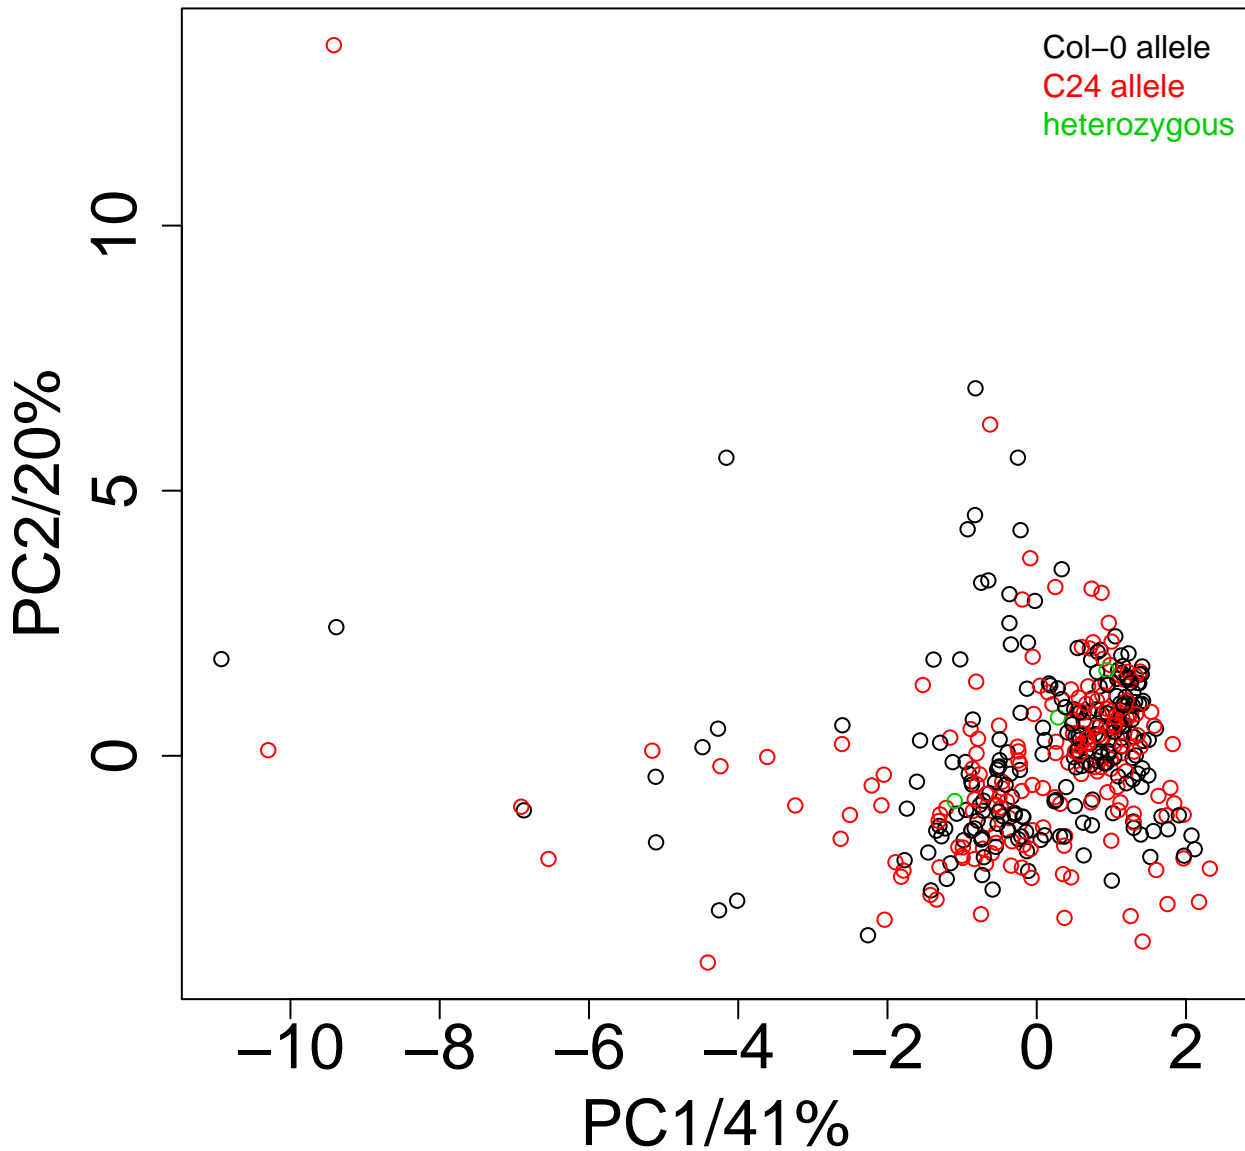

Chr. 3 Pos. 32.5 / MASC04523

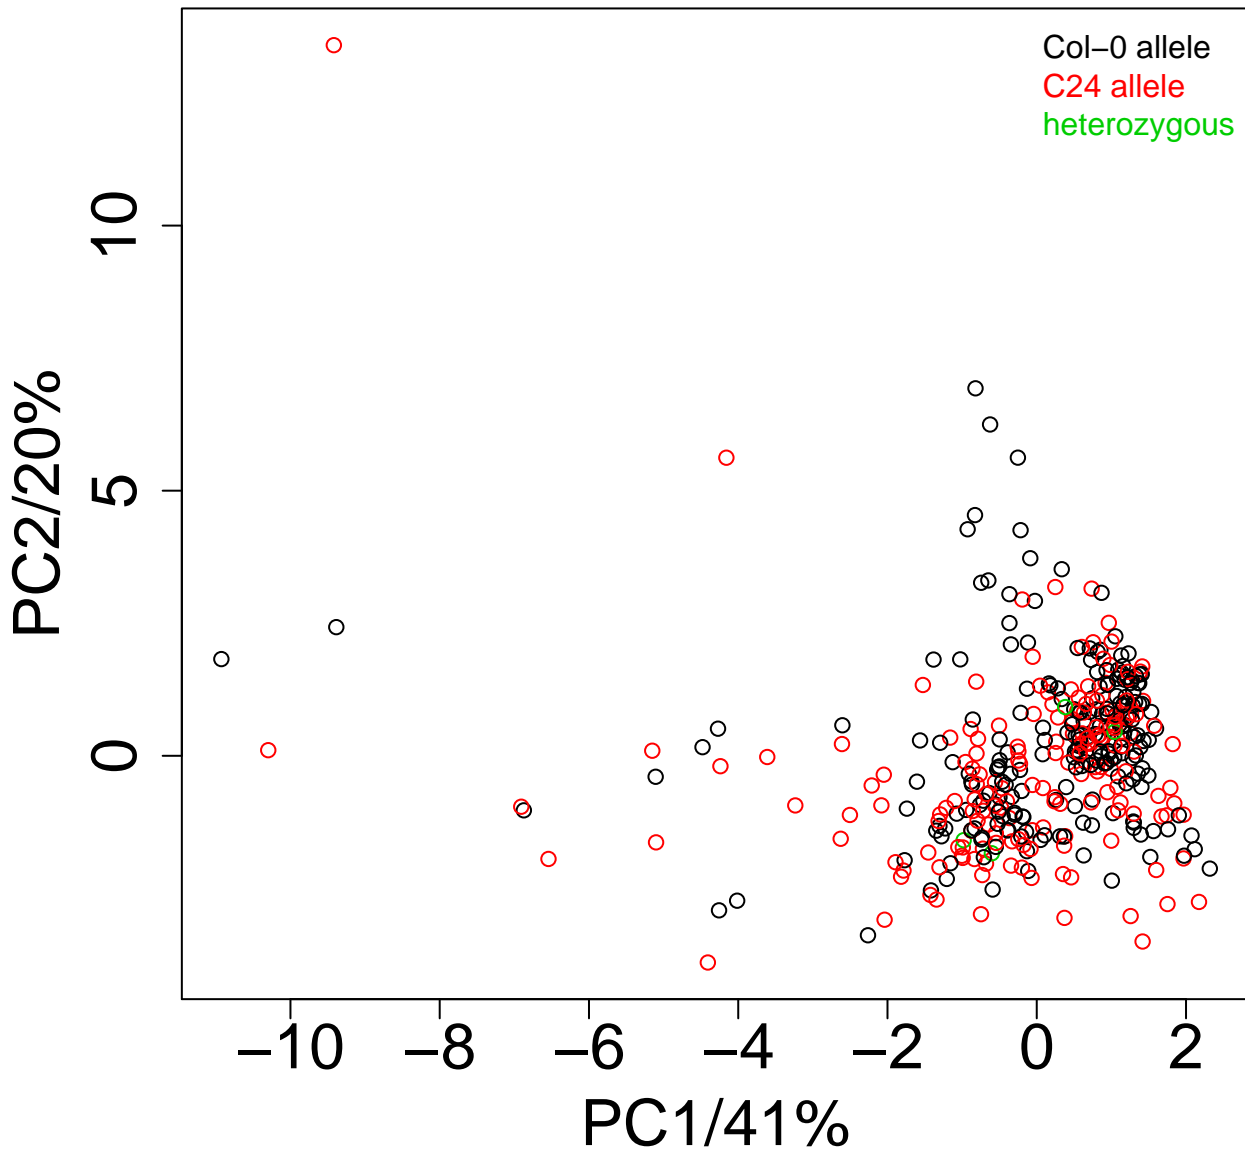

Chr. 3 Pos. 40.3 / MASC02648

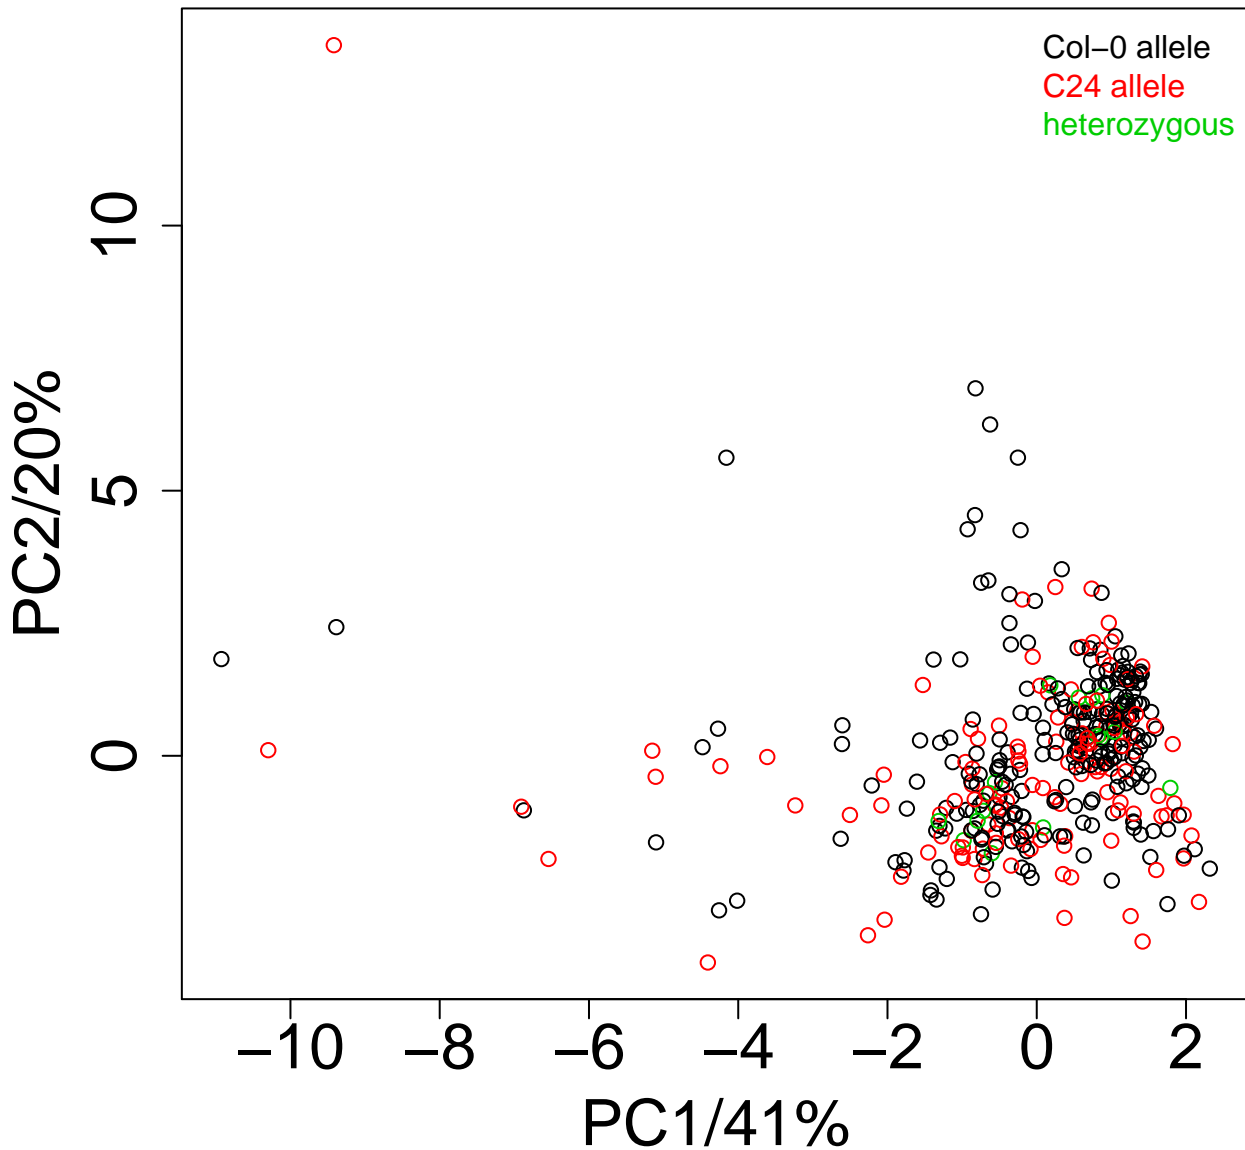



Chr. 3 Pos. 40.9 / MSAT3.32

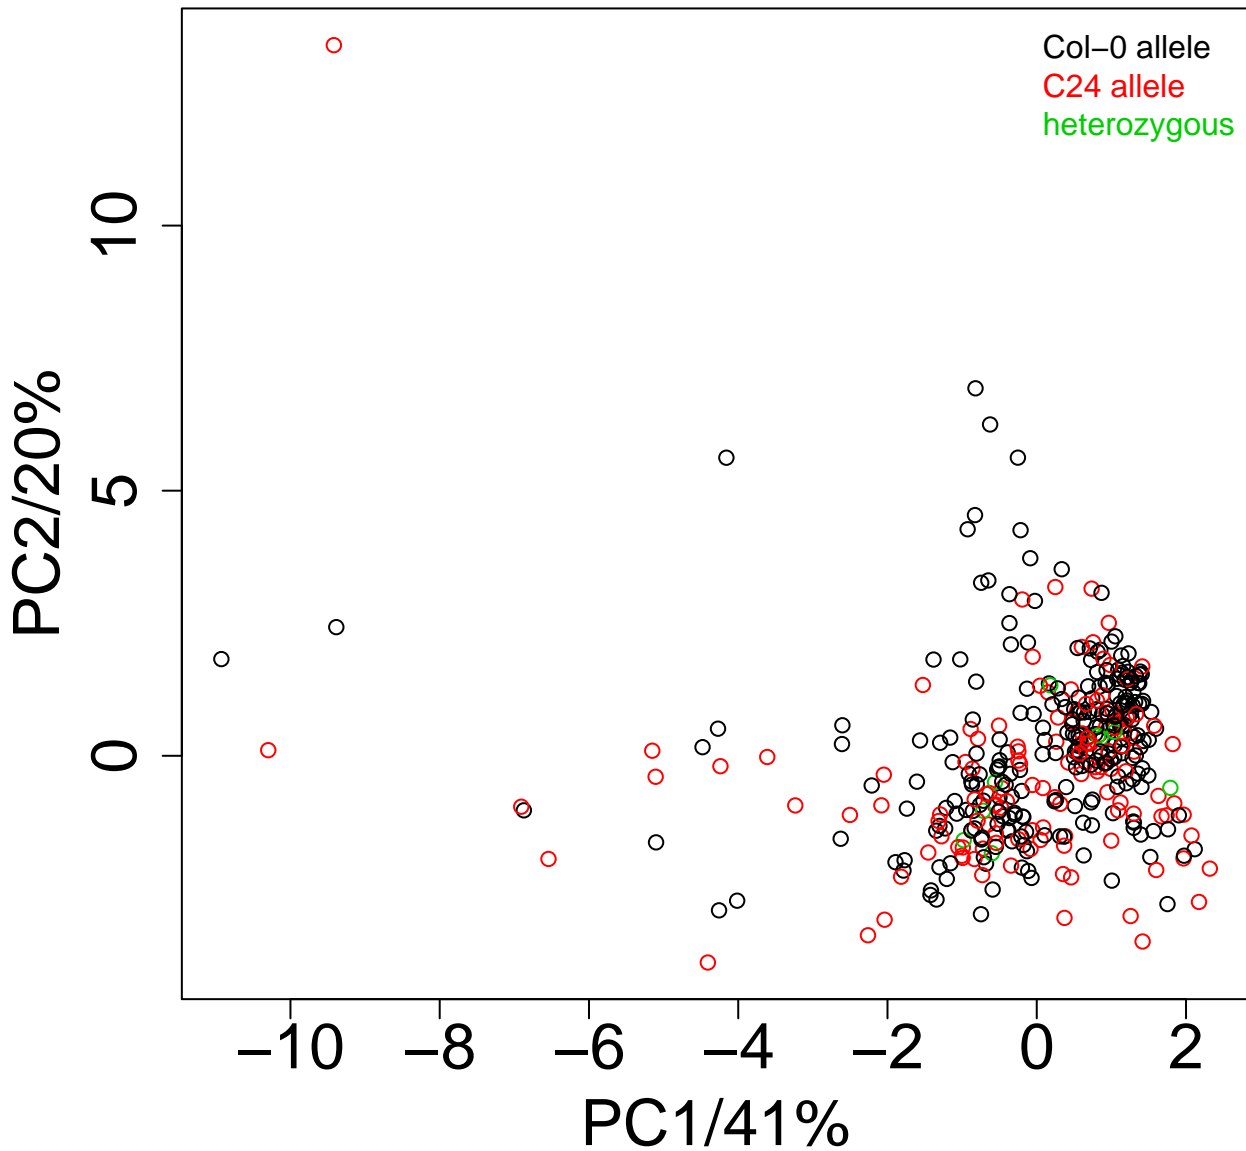

Chr. 3 Pos. 43.9 / MASC04262

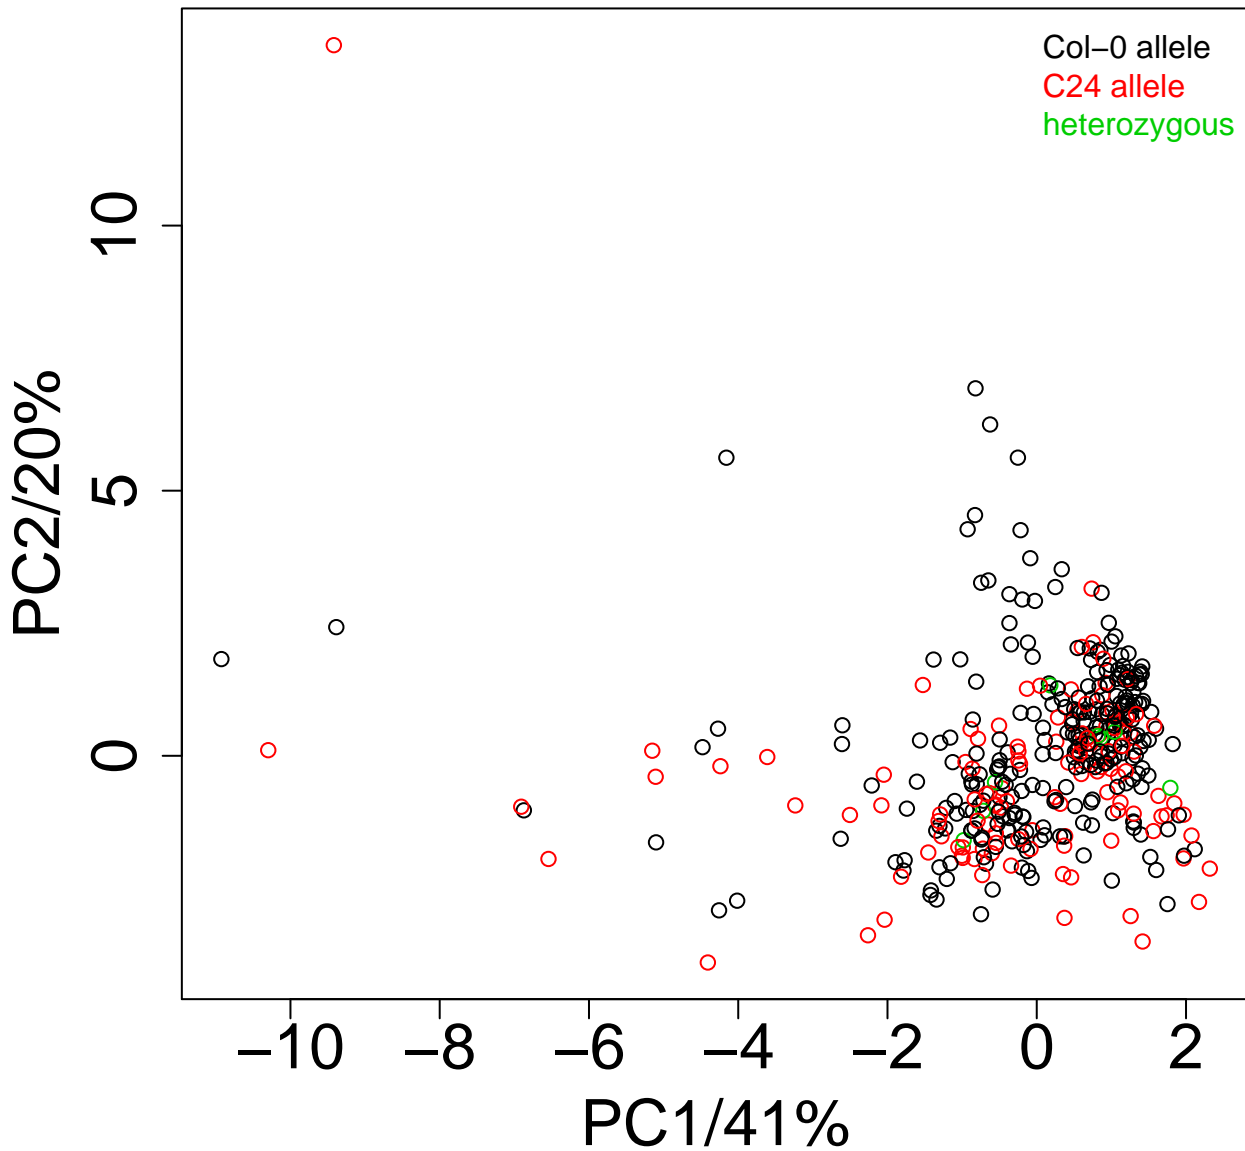

Chr. 3 Pos. 44.1 / MASC05045

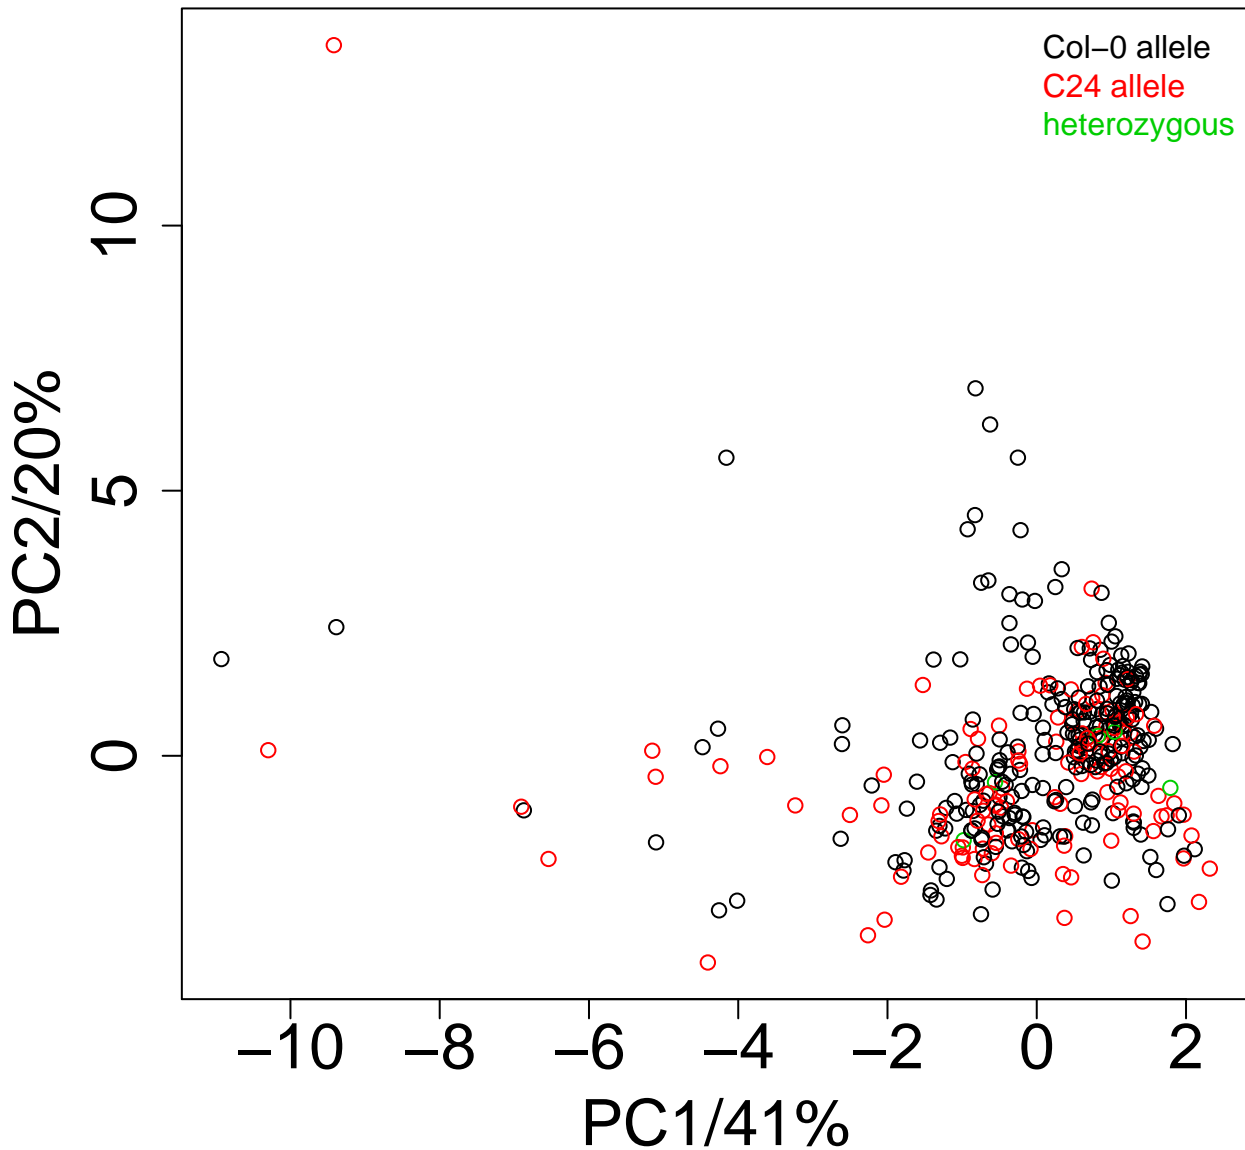

Chr. 3 Pos. 46.4 / MASC04819

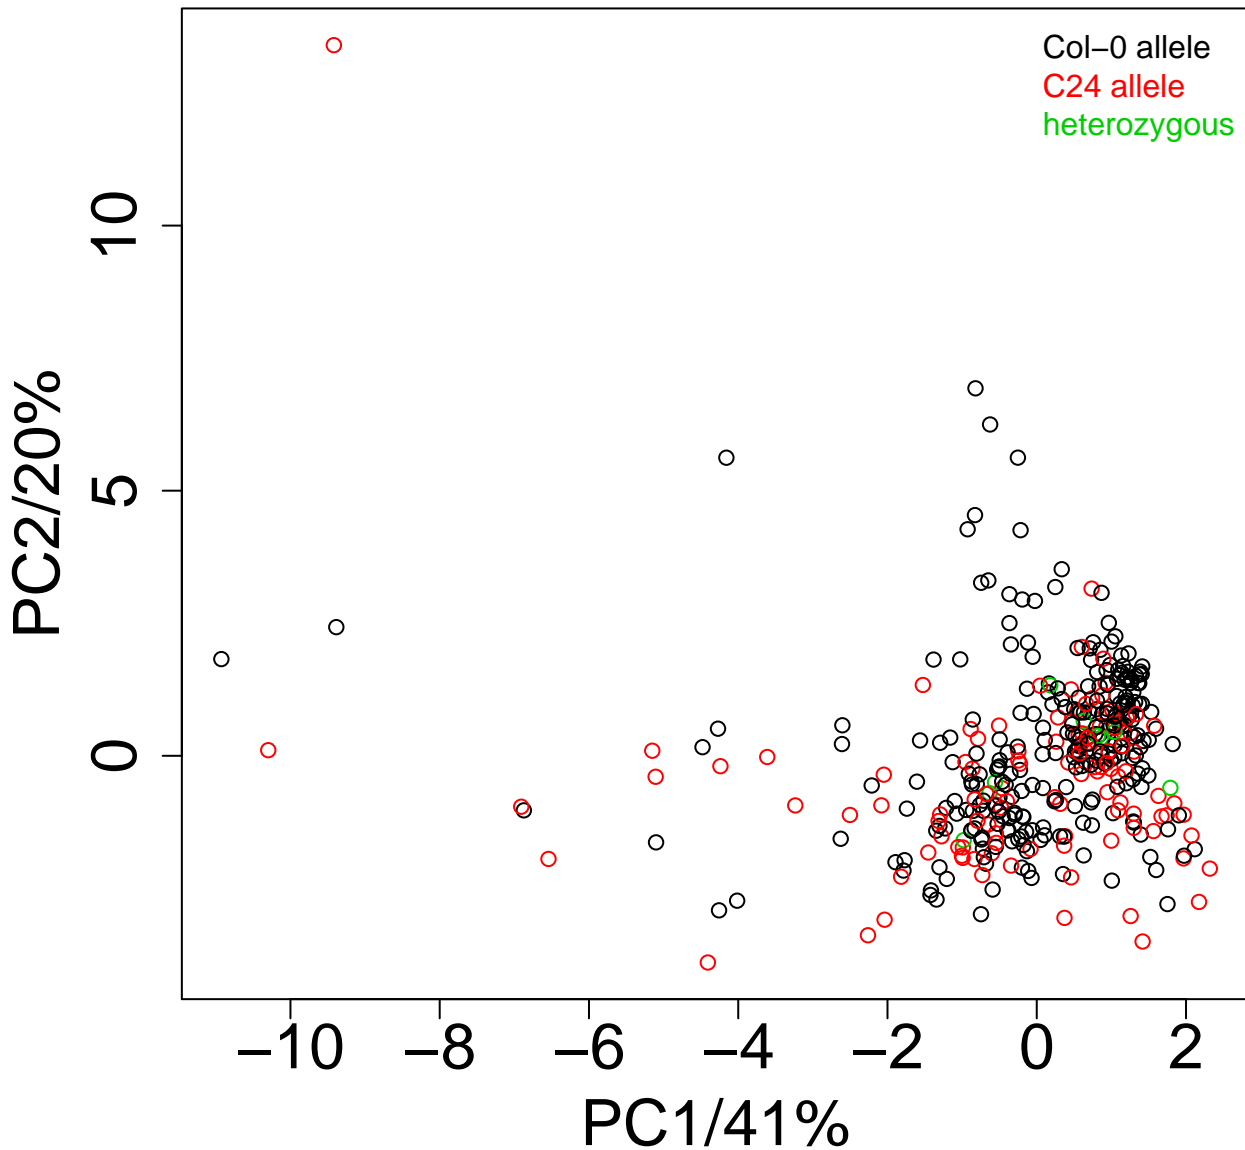

Chr. 3 Pos. 51.5 / MASC07090

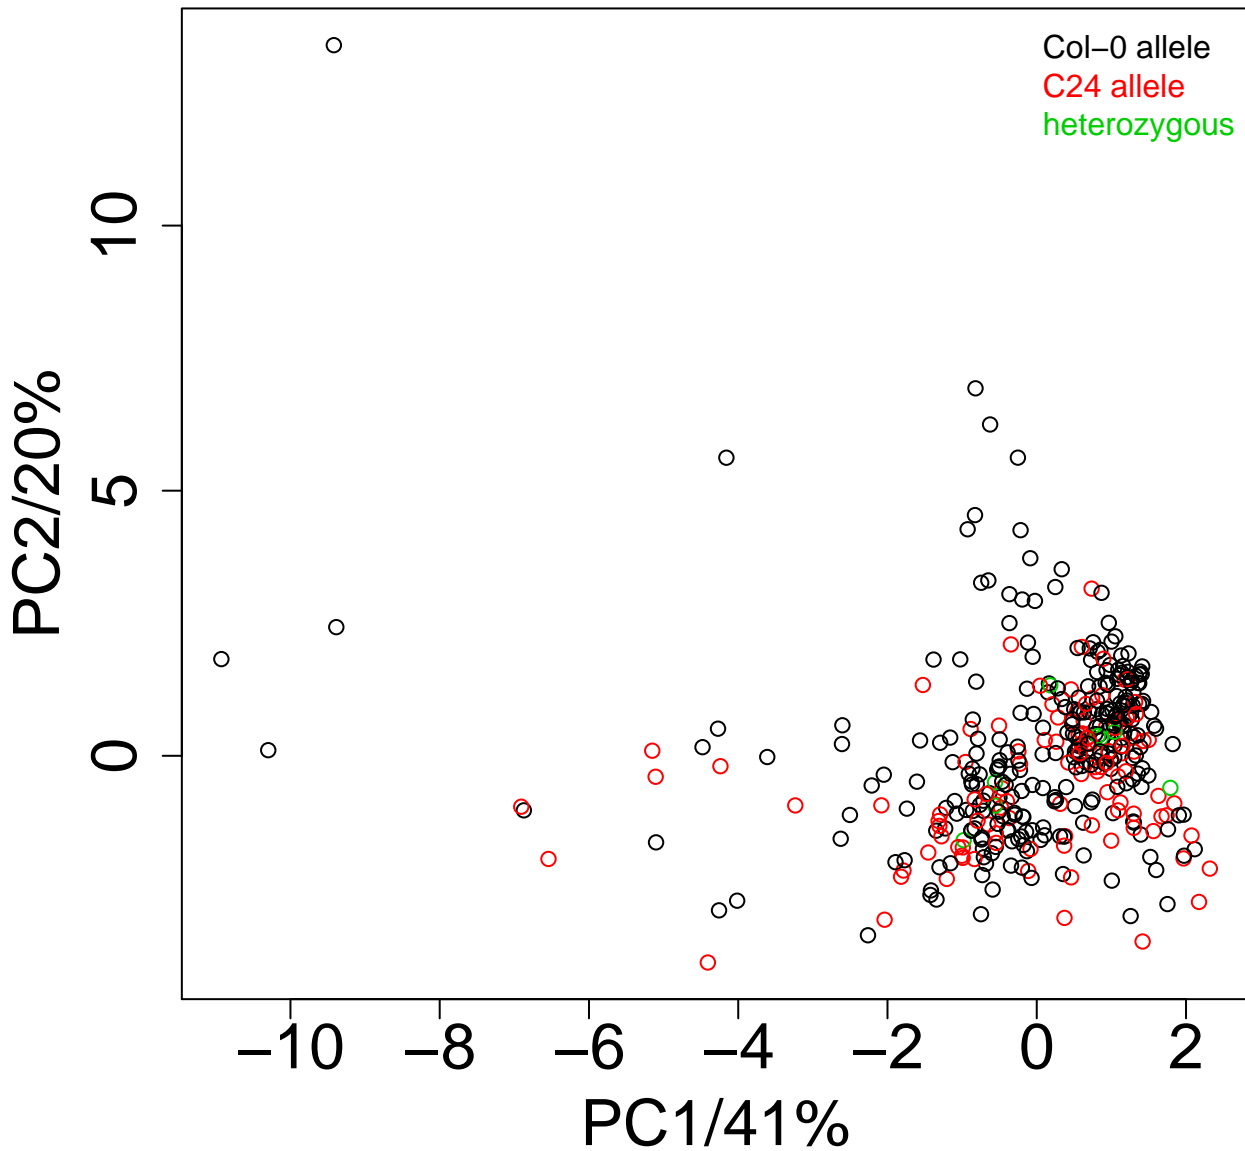

Chr. 3 Pos. 51.5 / MASC01171



Chr. 3 Pos. 57.4 / T6H20ID

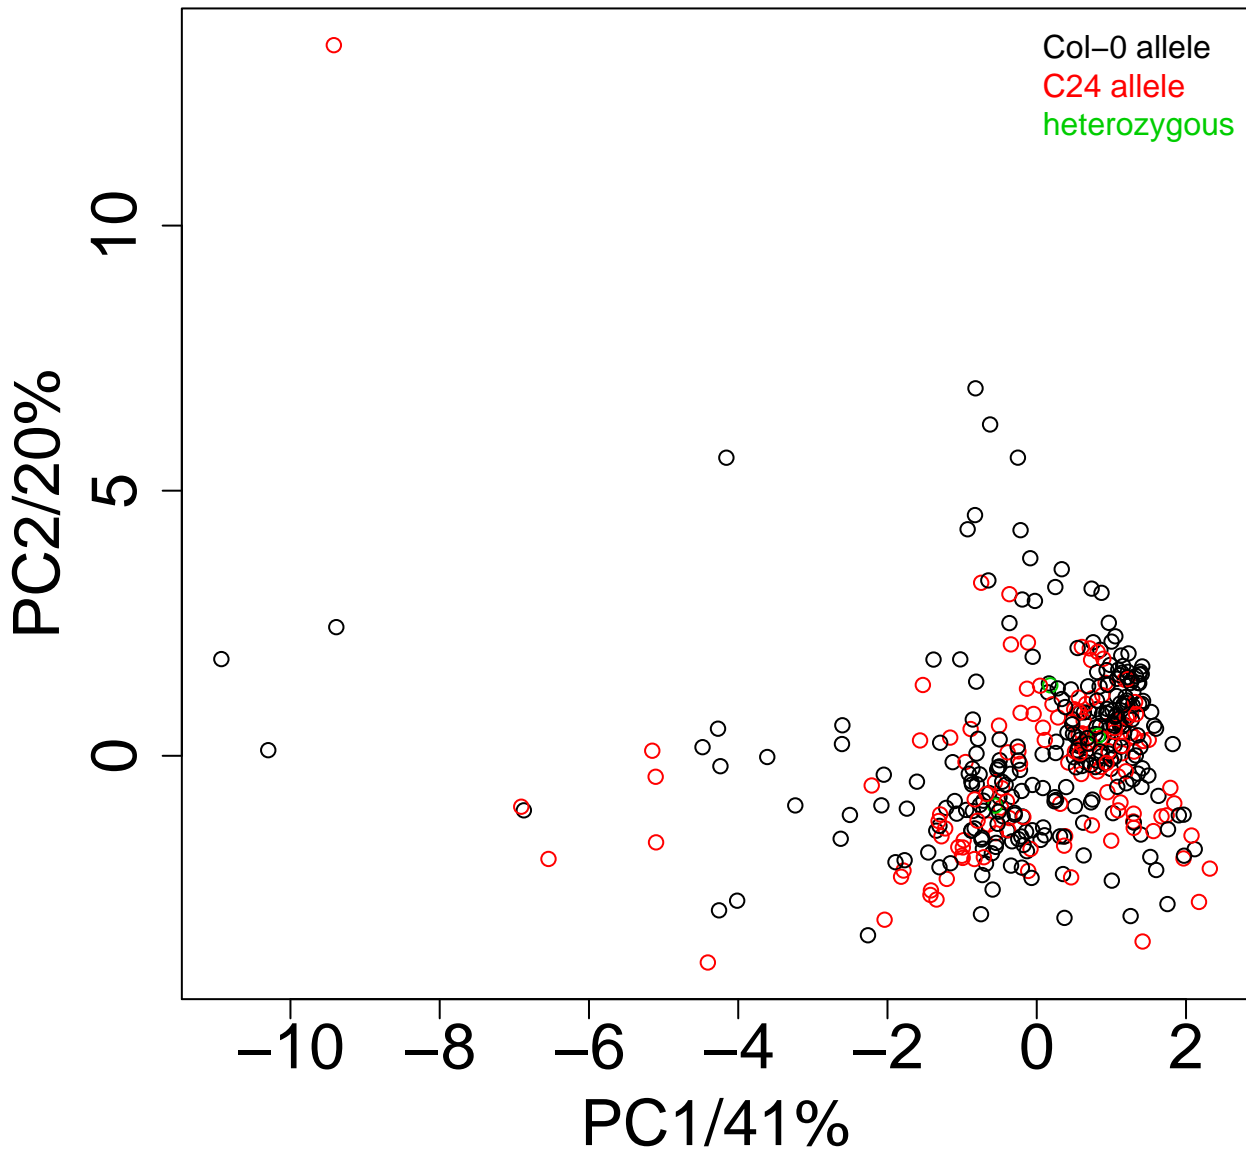

Chr. 3 Pos. 61.1 / MASC09224

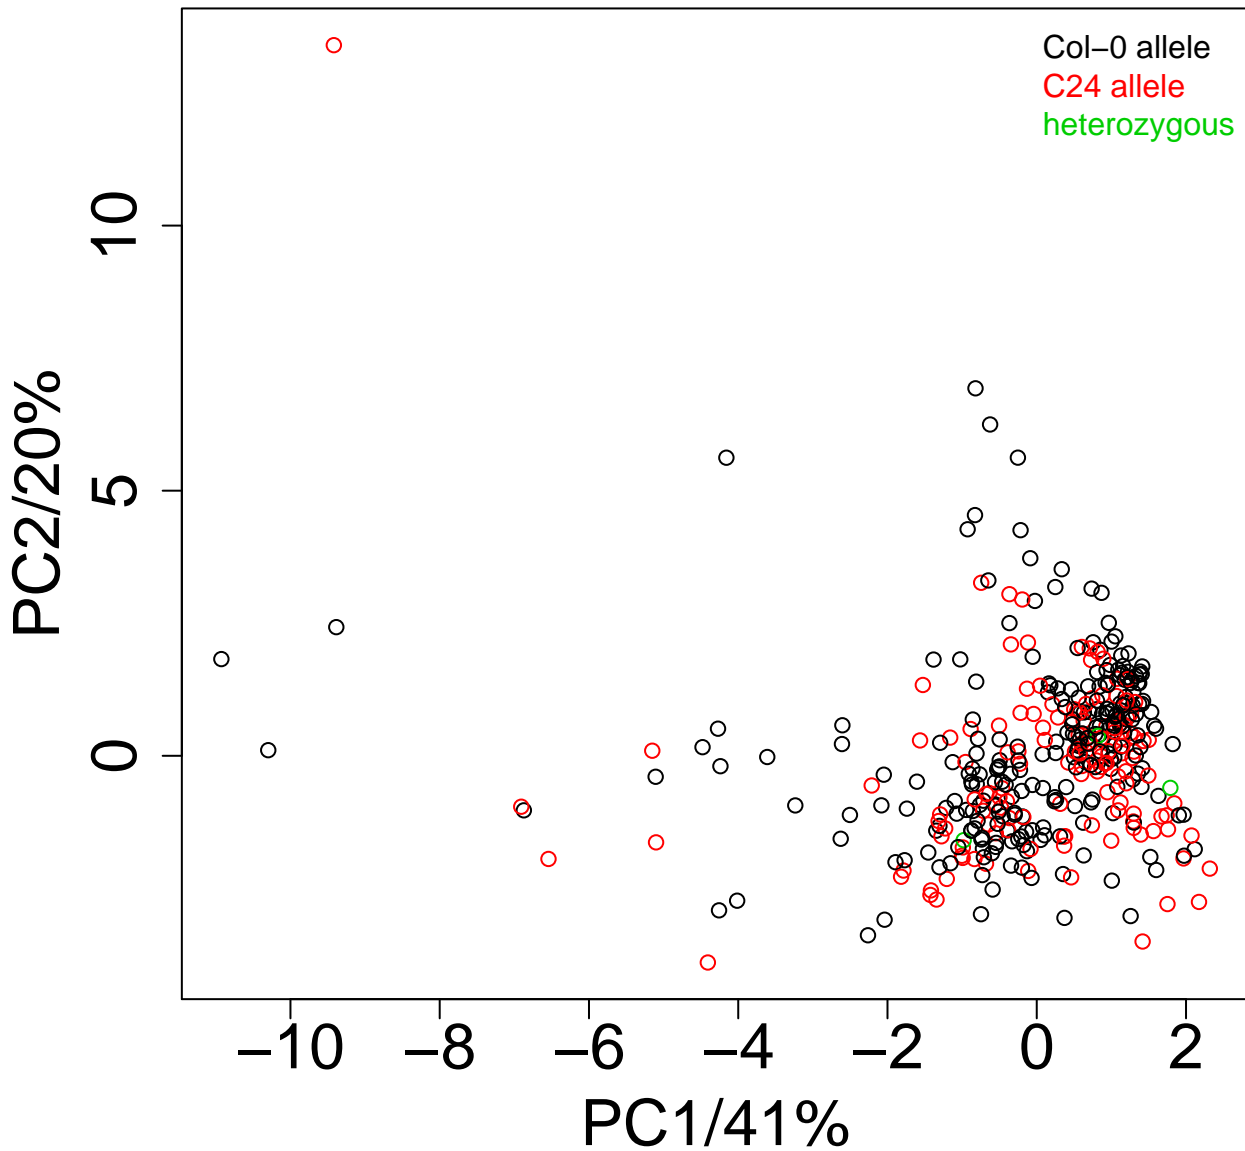



Chr. 3 Pos. 66.5 / MASC03218

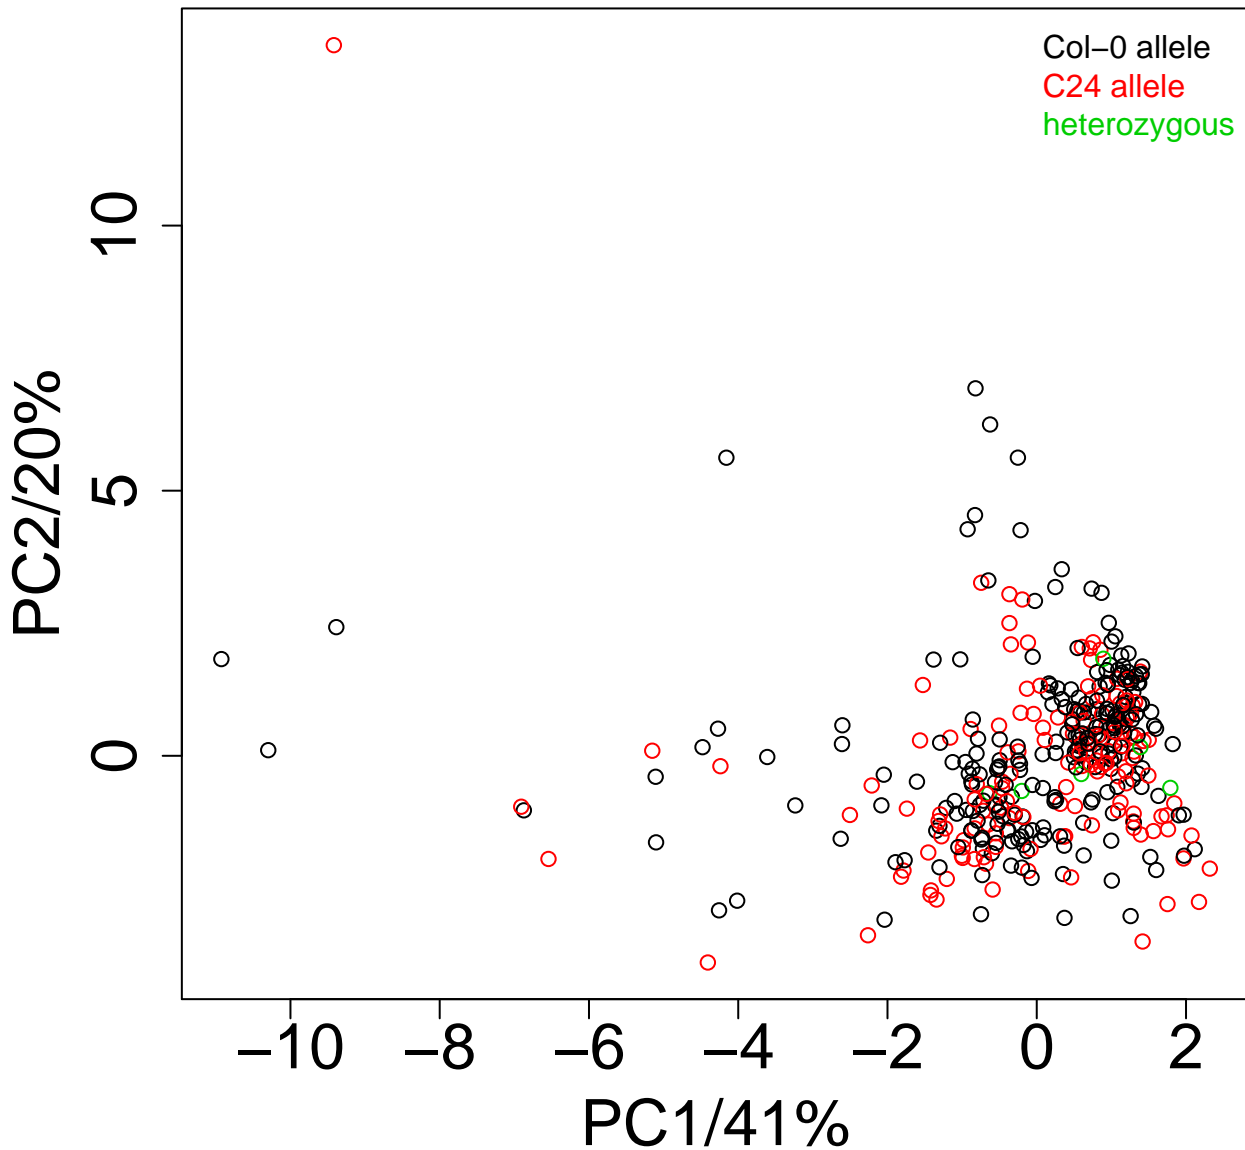

Chr. 3 Pos. 70 / MASC02788

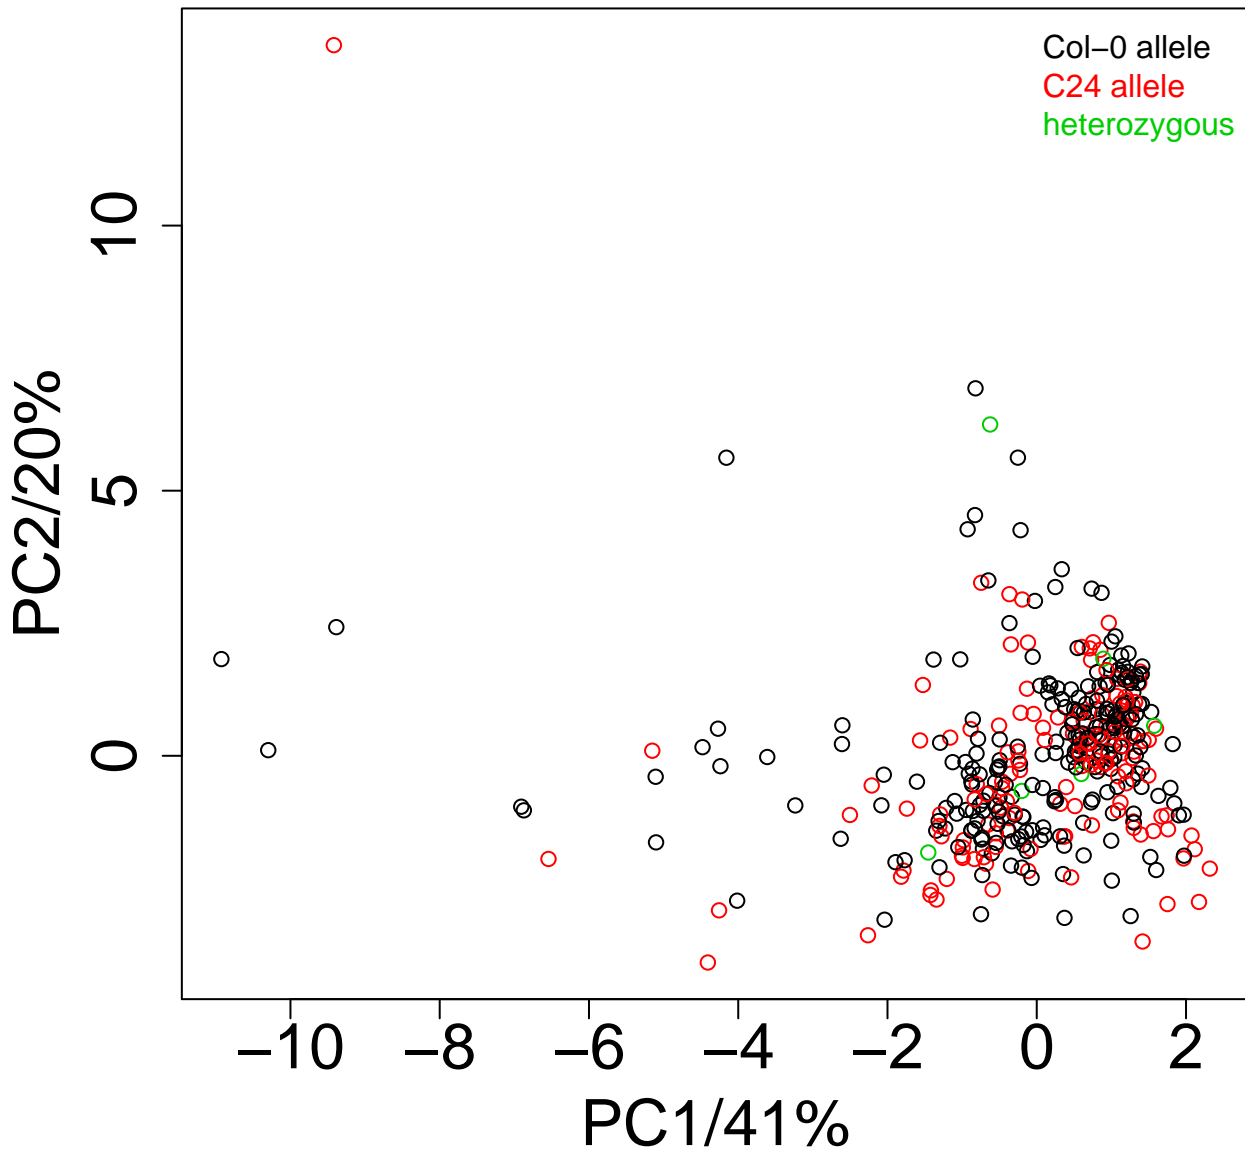

Chr. 3 Pos. 72.6 / MASC09218

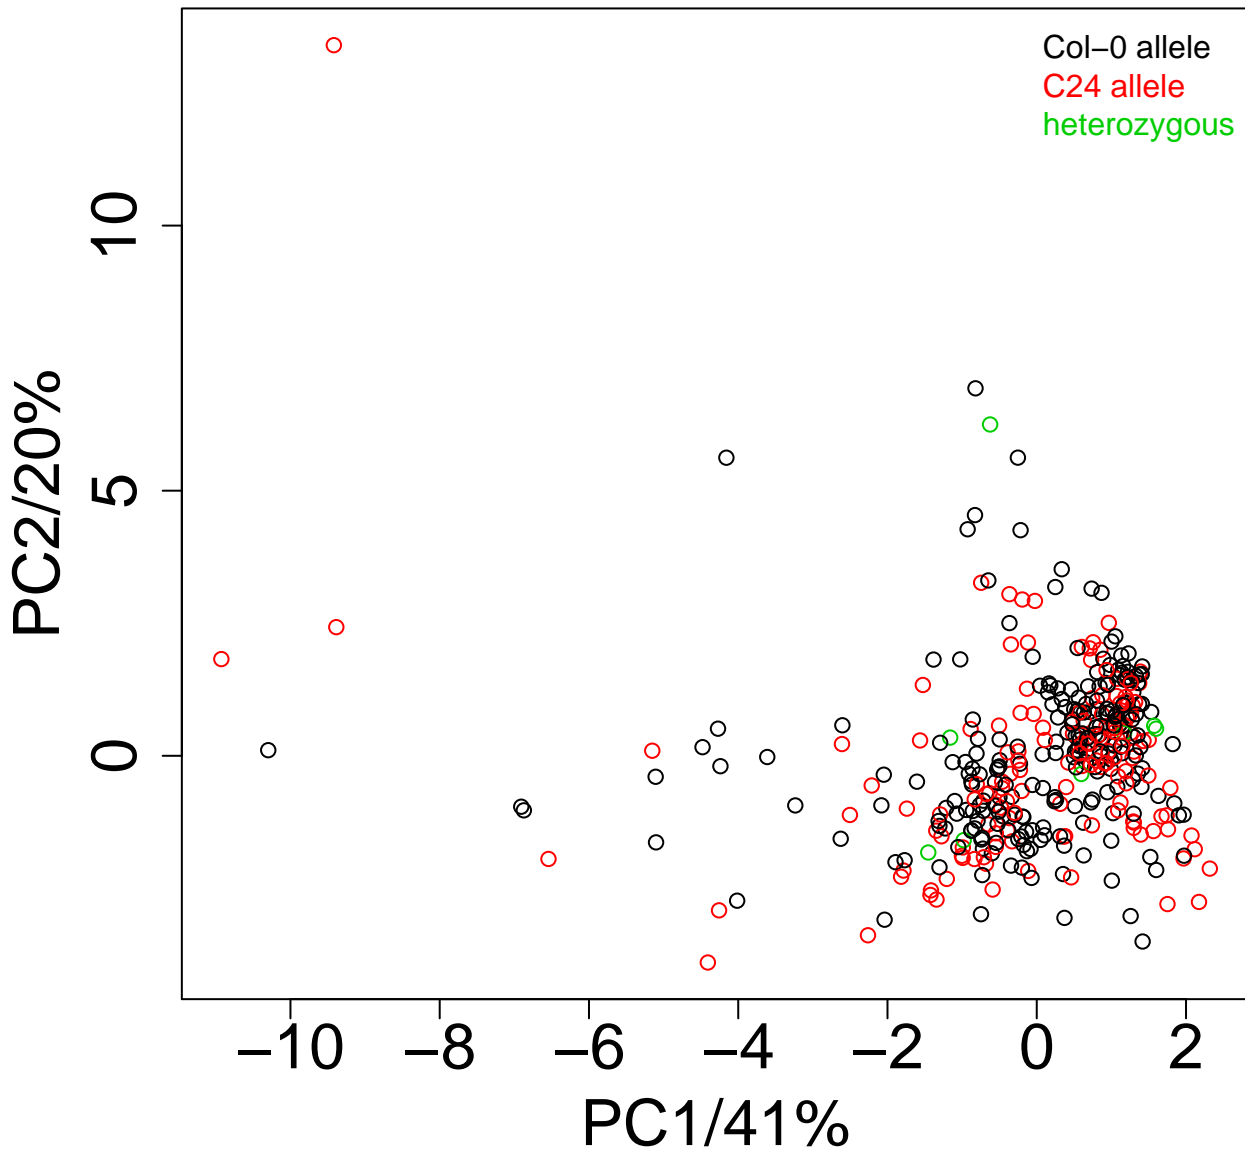

Chr. 3 Pos. 73.3 / MASC04925

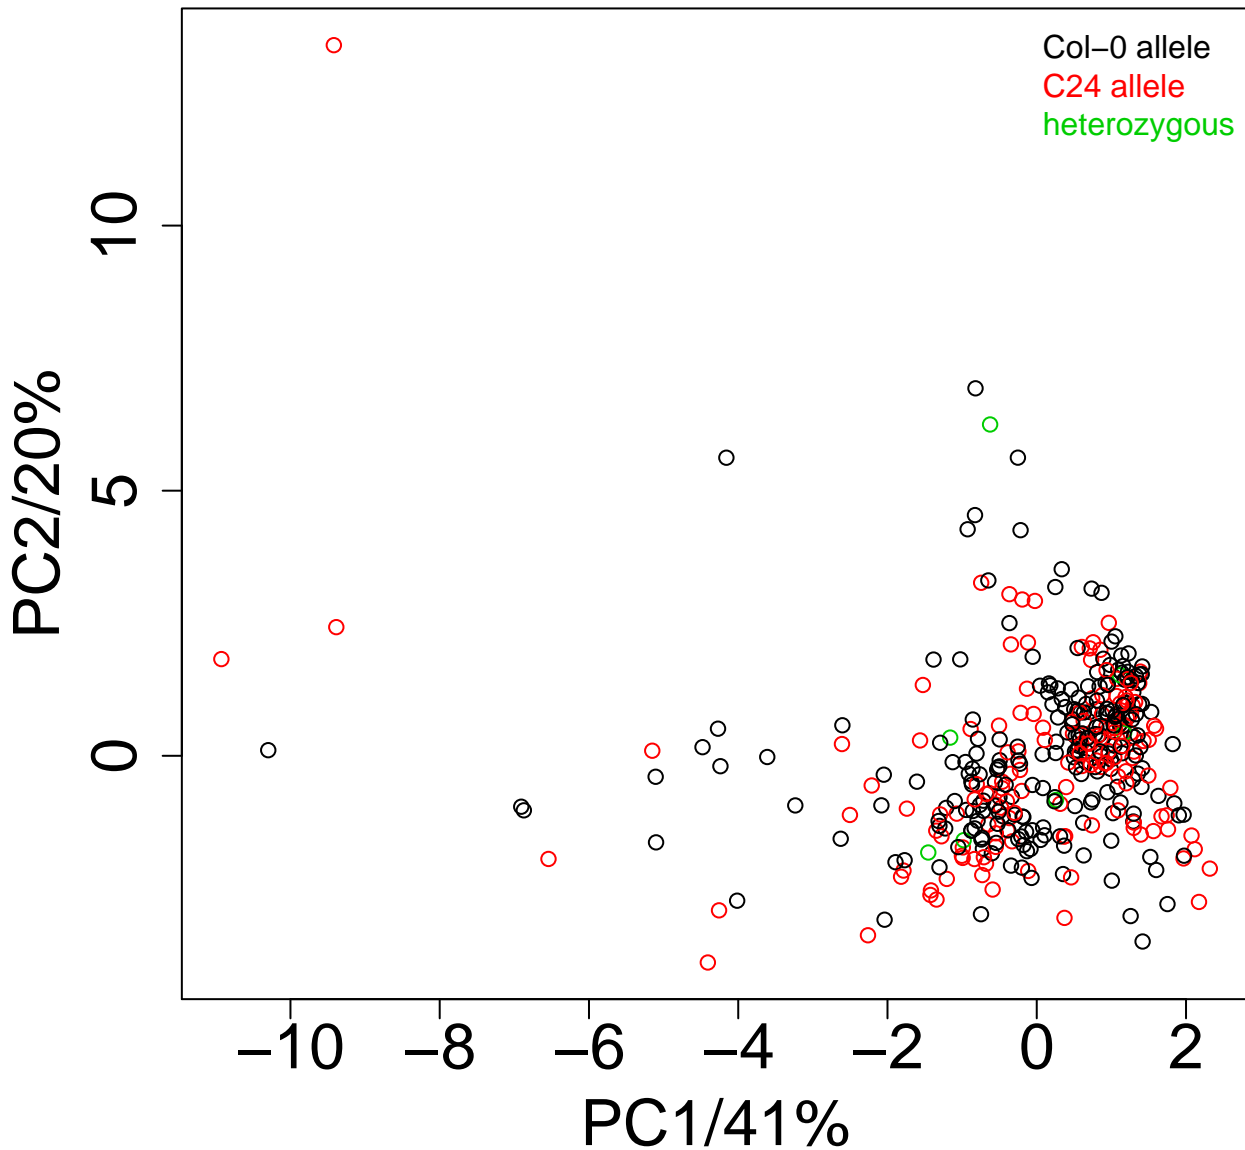

Chr. 3 Pos. 76.4 / M3\_9924

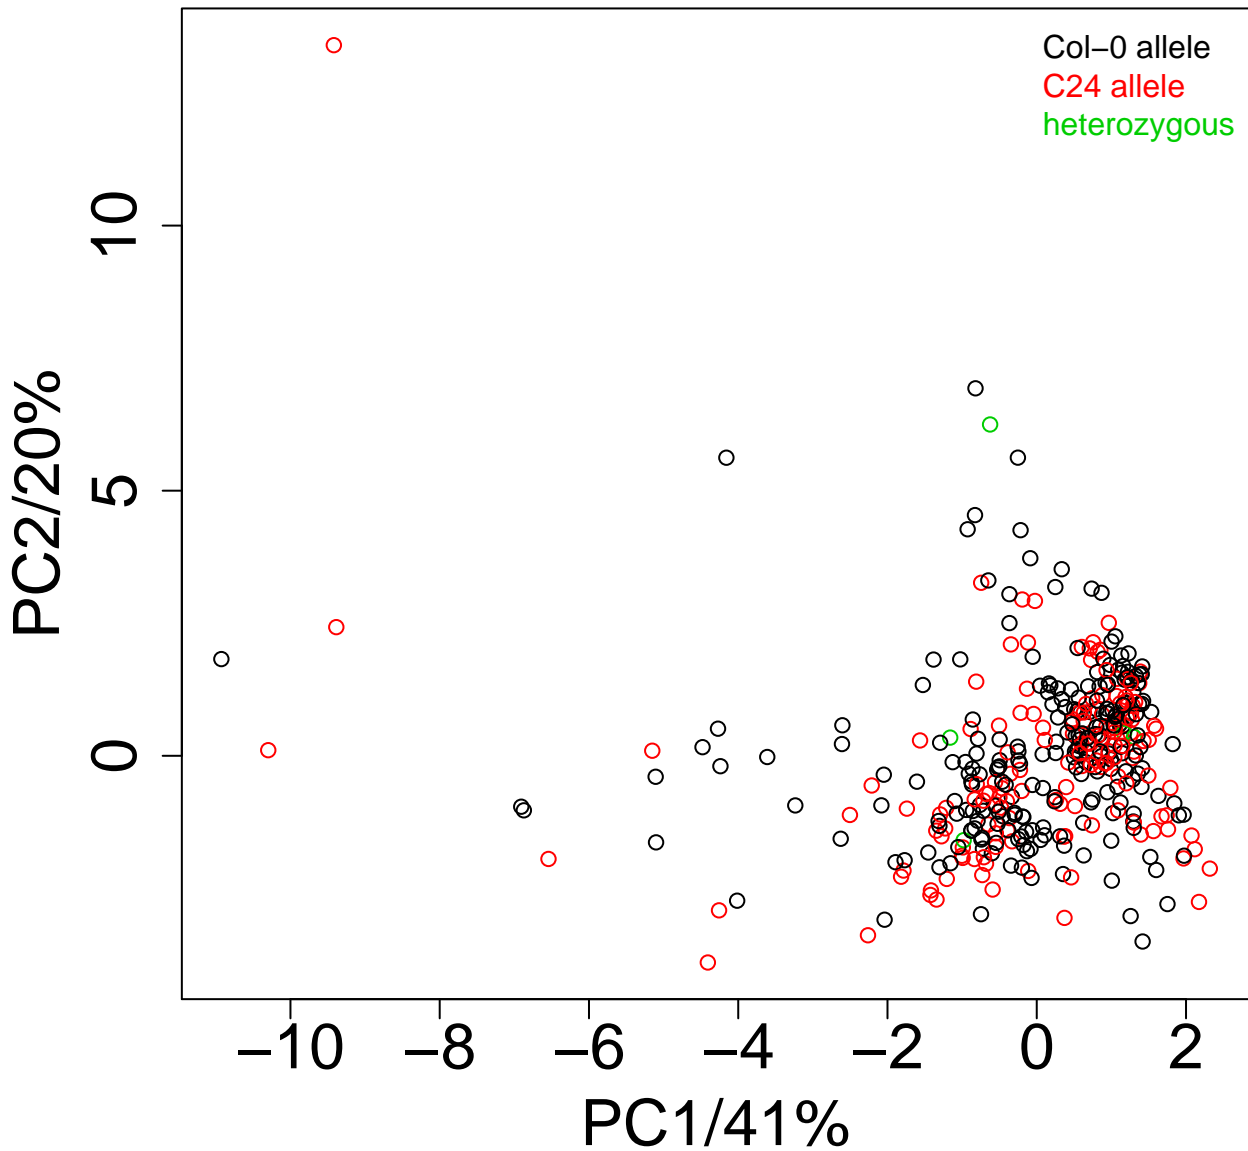

Chr. 3 Pos. 76.8 / MASC09219

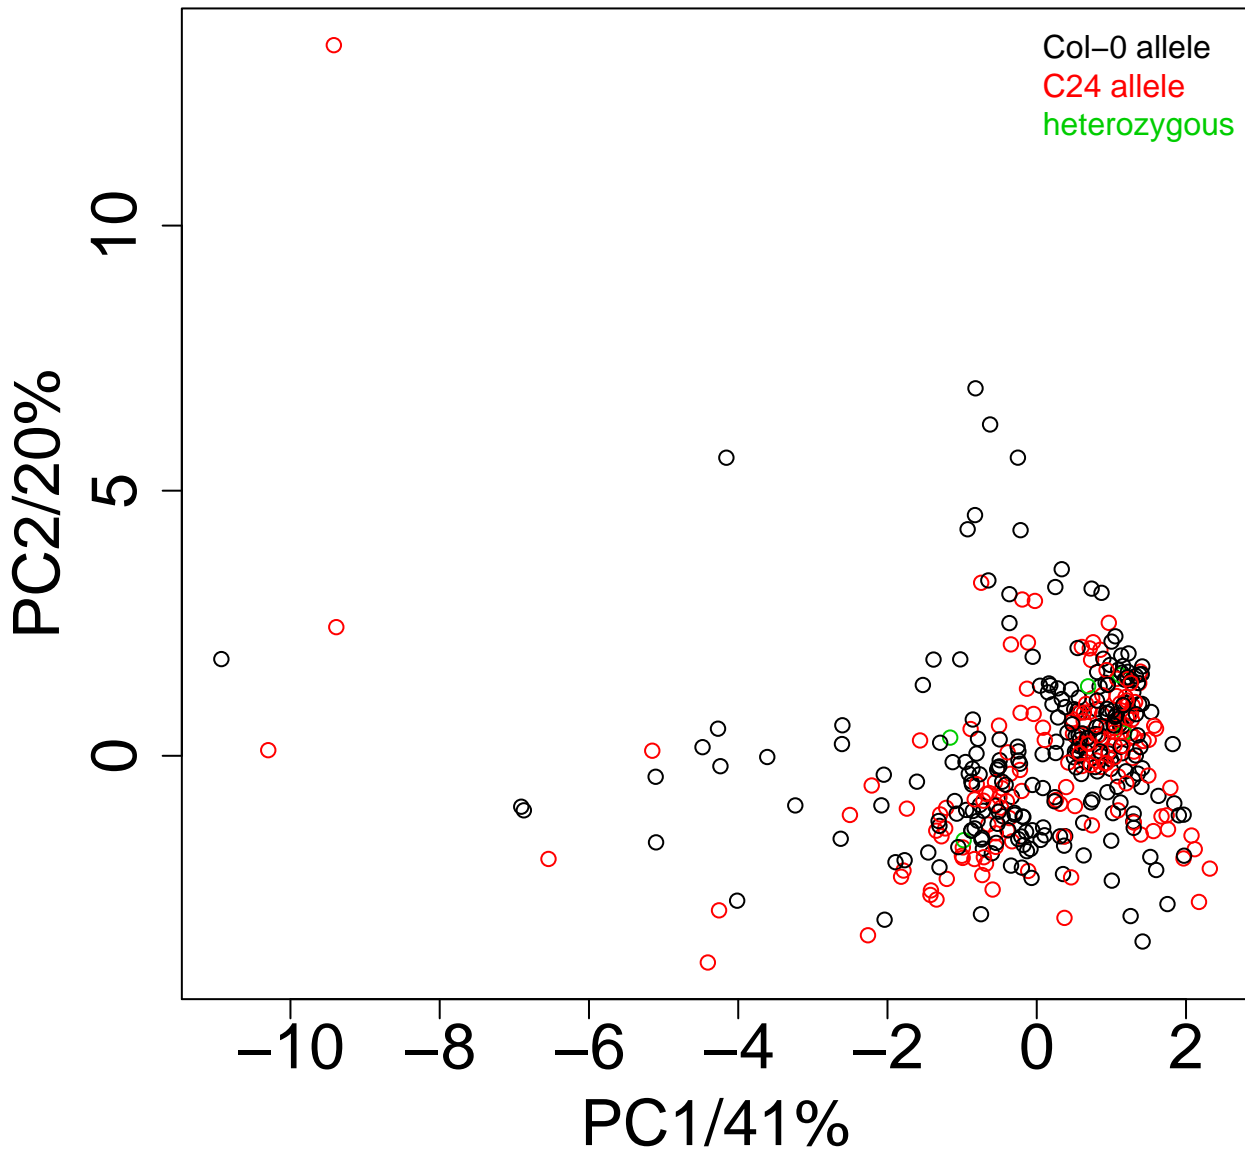

Chr. 4 Pos. 0 / MASC02820

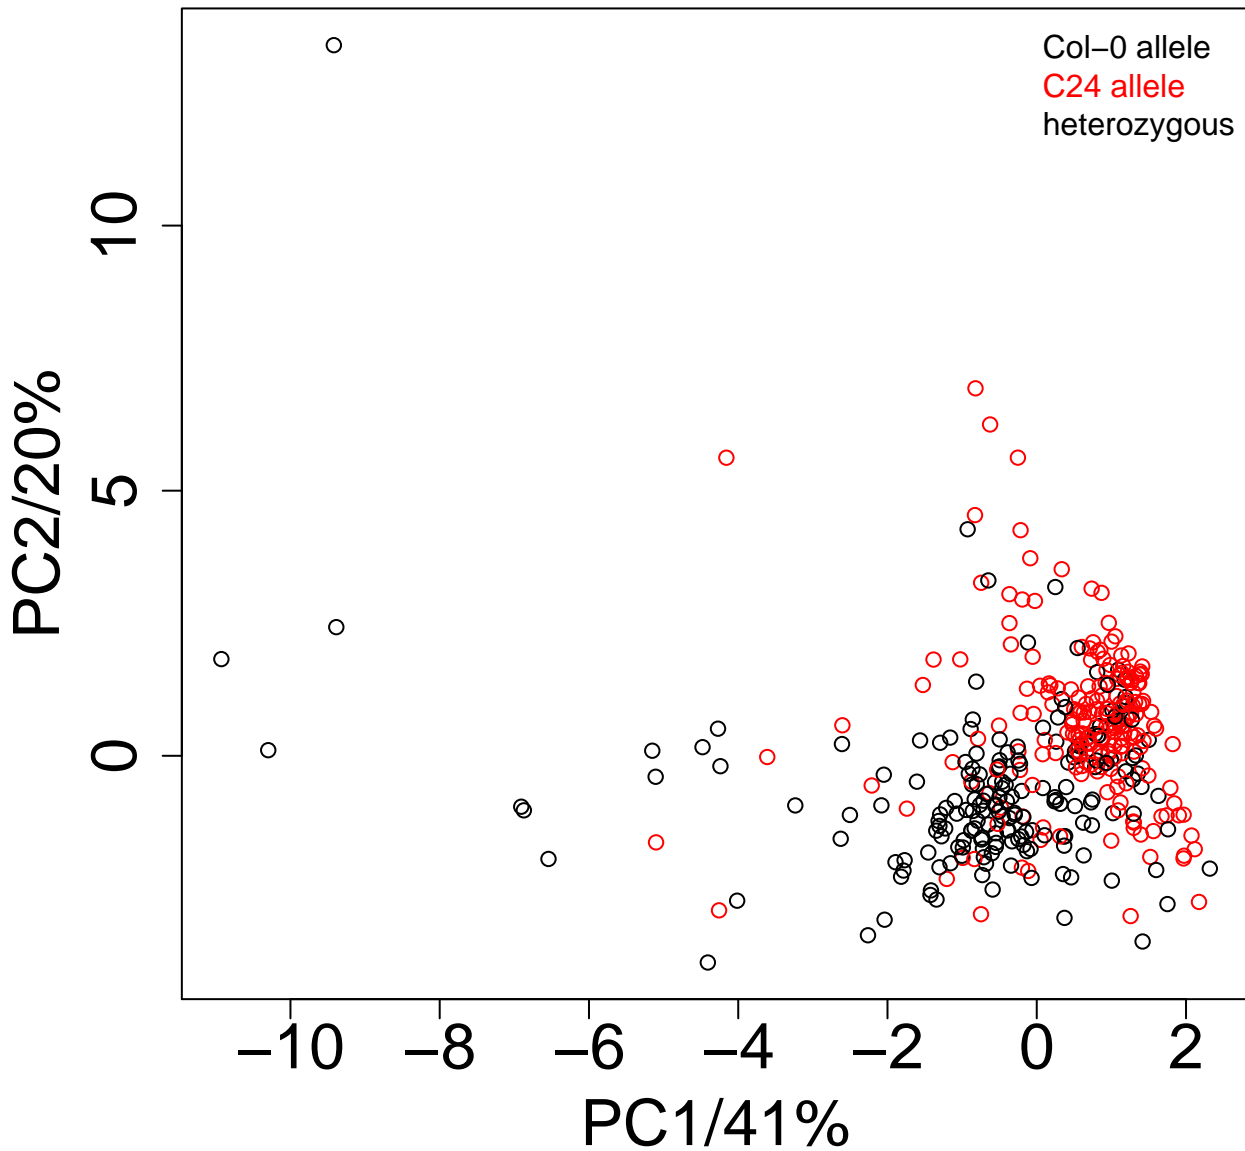

Chr. 4 Pos. 0.6 / MASC04036

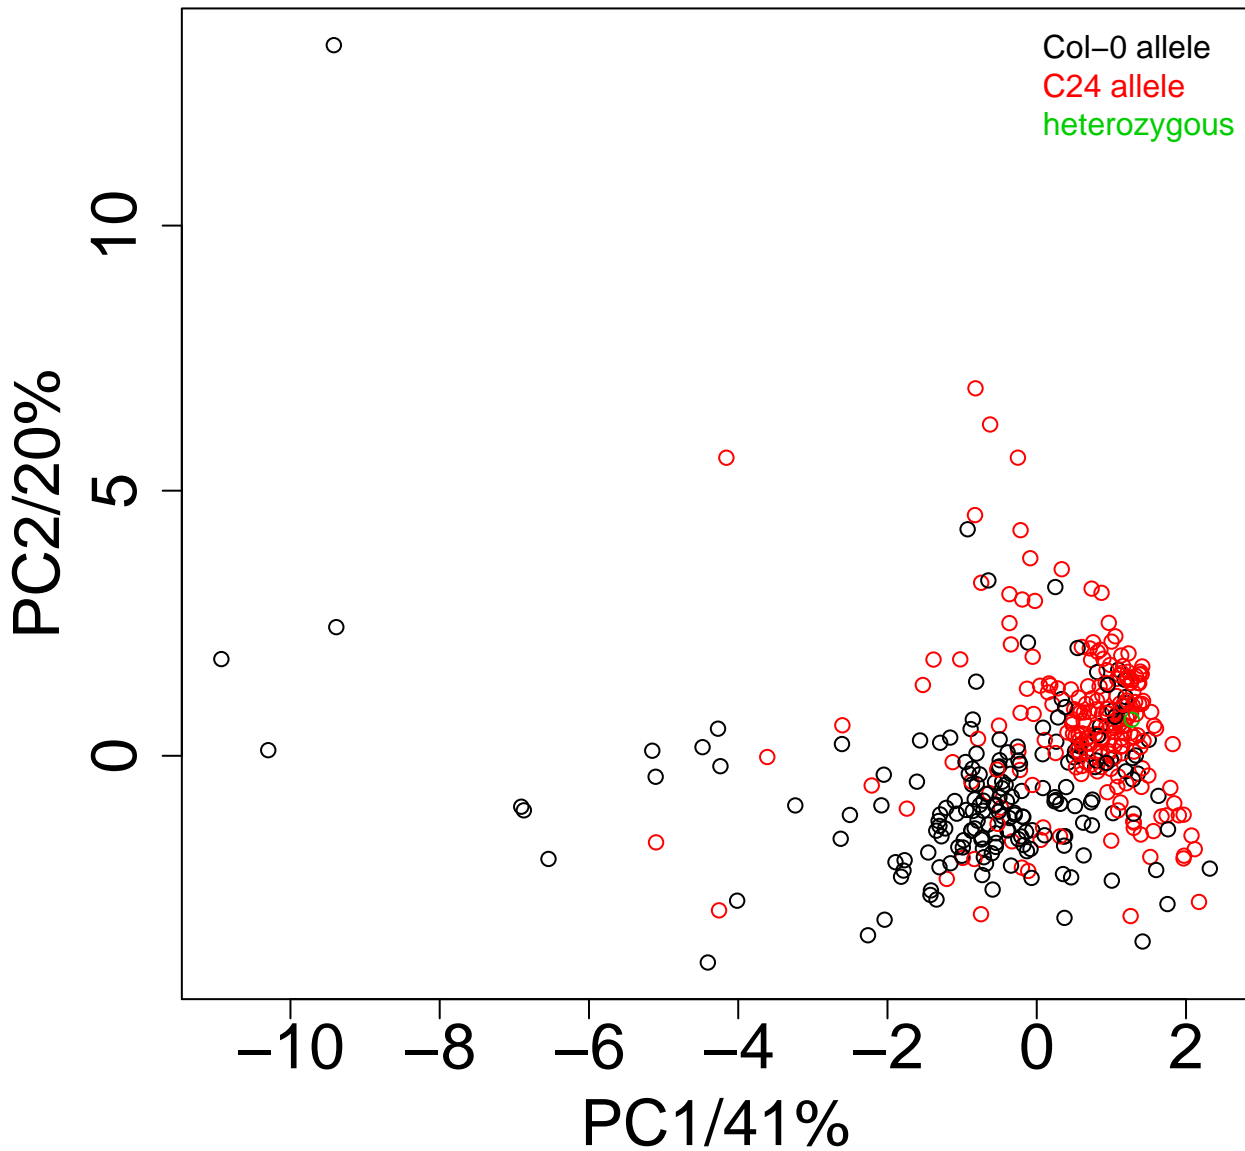



Chr. 4 Pos. 1.5 / MASC07015

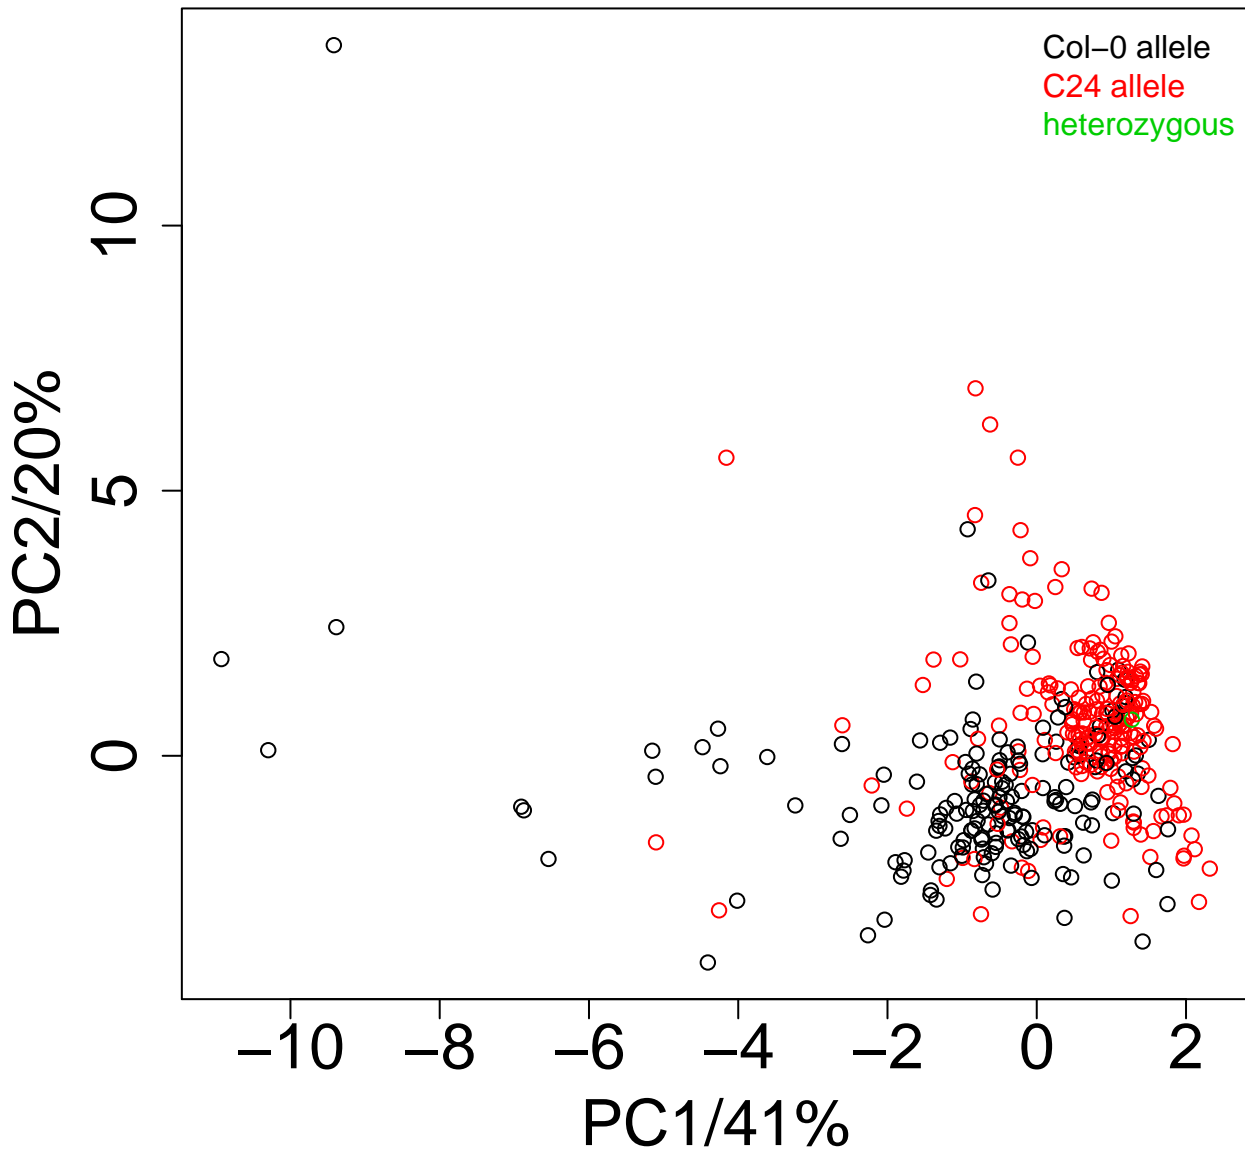

Chr. 4 Pos. 4.1 / F6N23ID

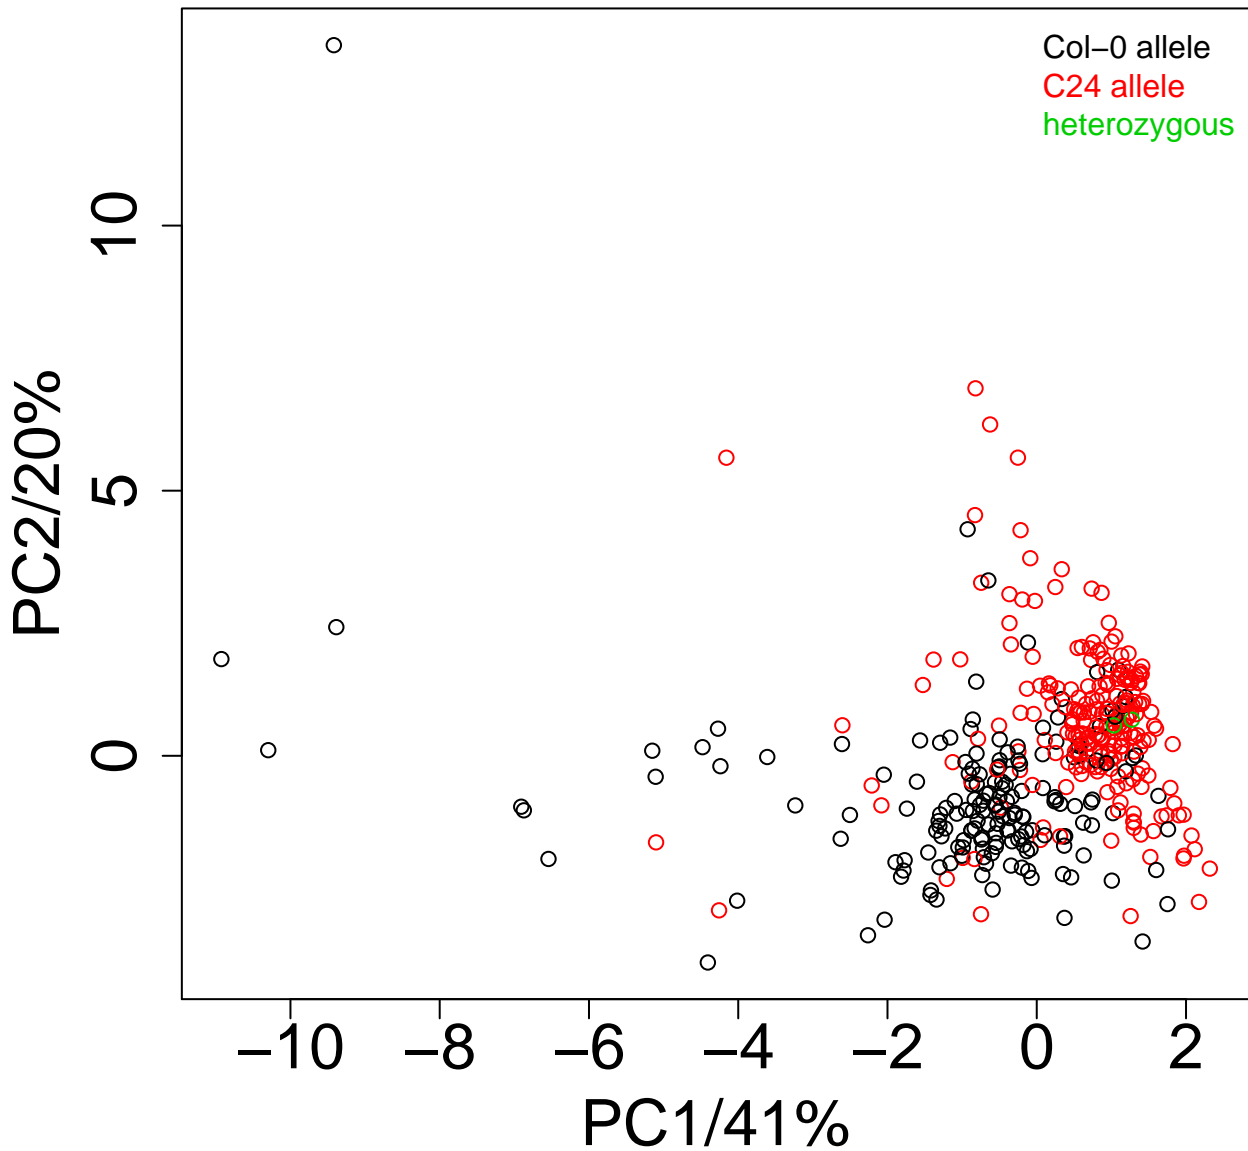

Chr. 4 Pos. 4.1 / MASC04123



Chr. 4 Pos. 10.1 / MASC04725

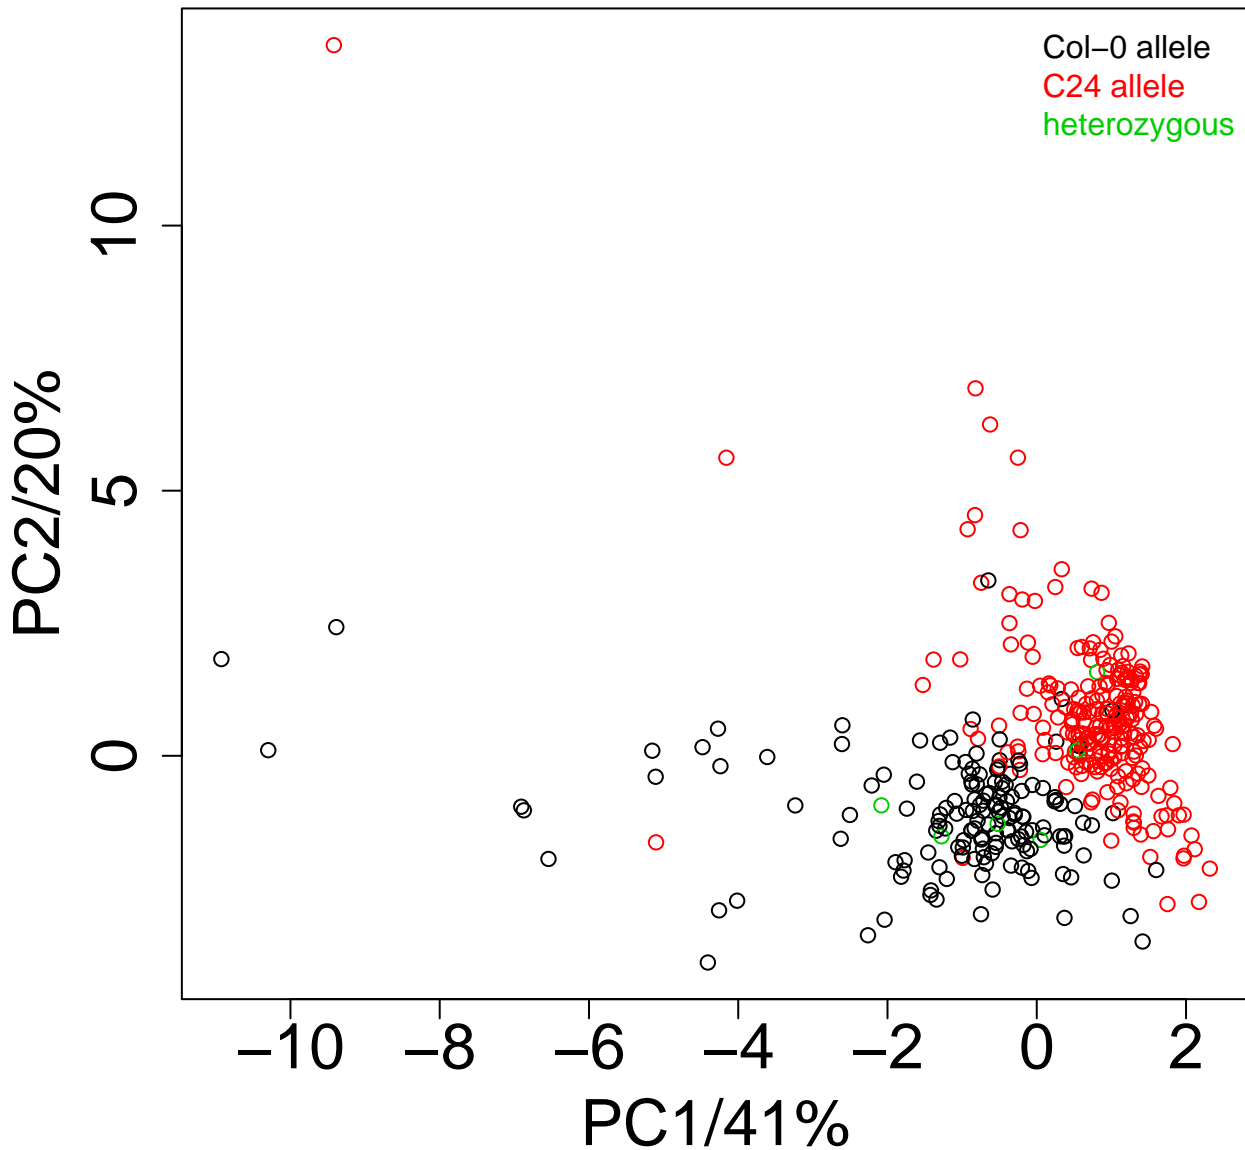

Chr. 4 Pos. 12.5 / MASC05042

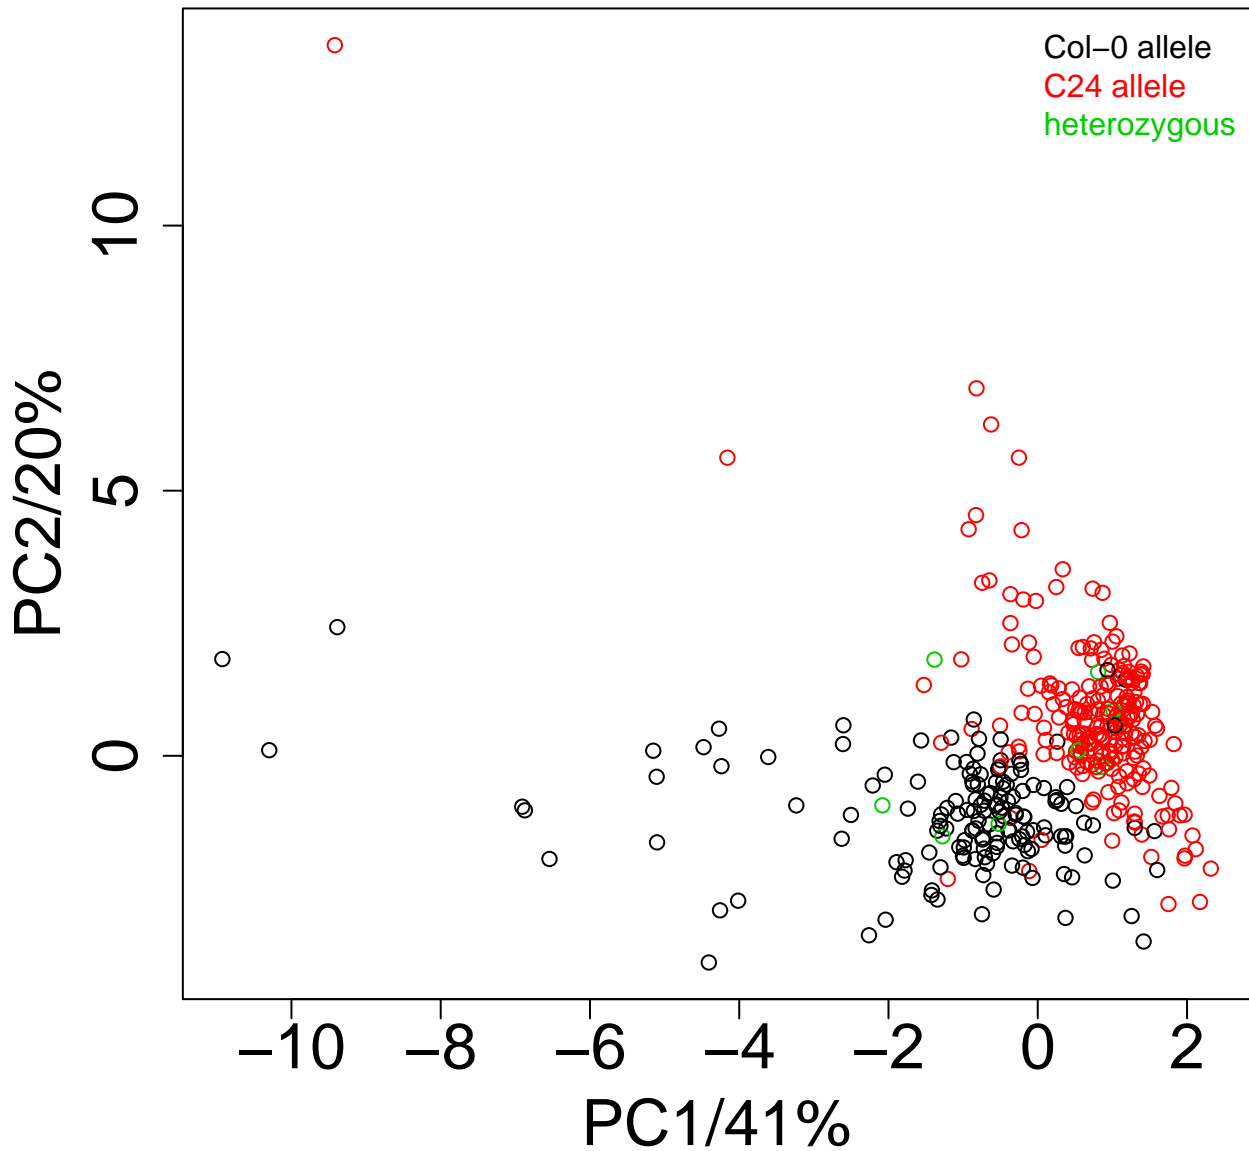

Chr. 4 Pos. 12.6 / MASC09225

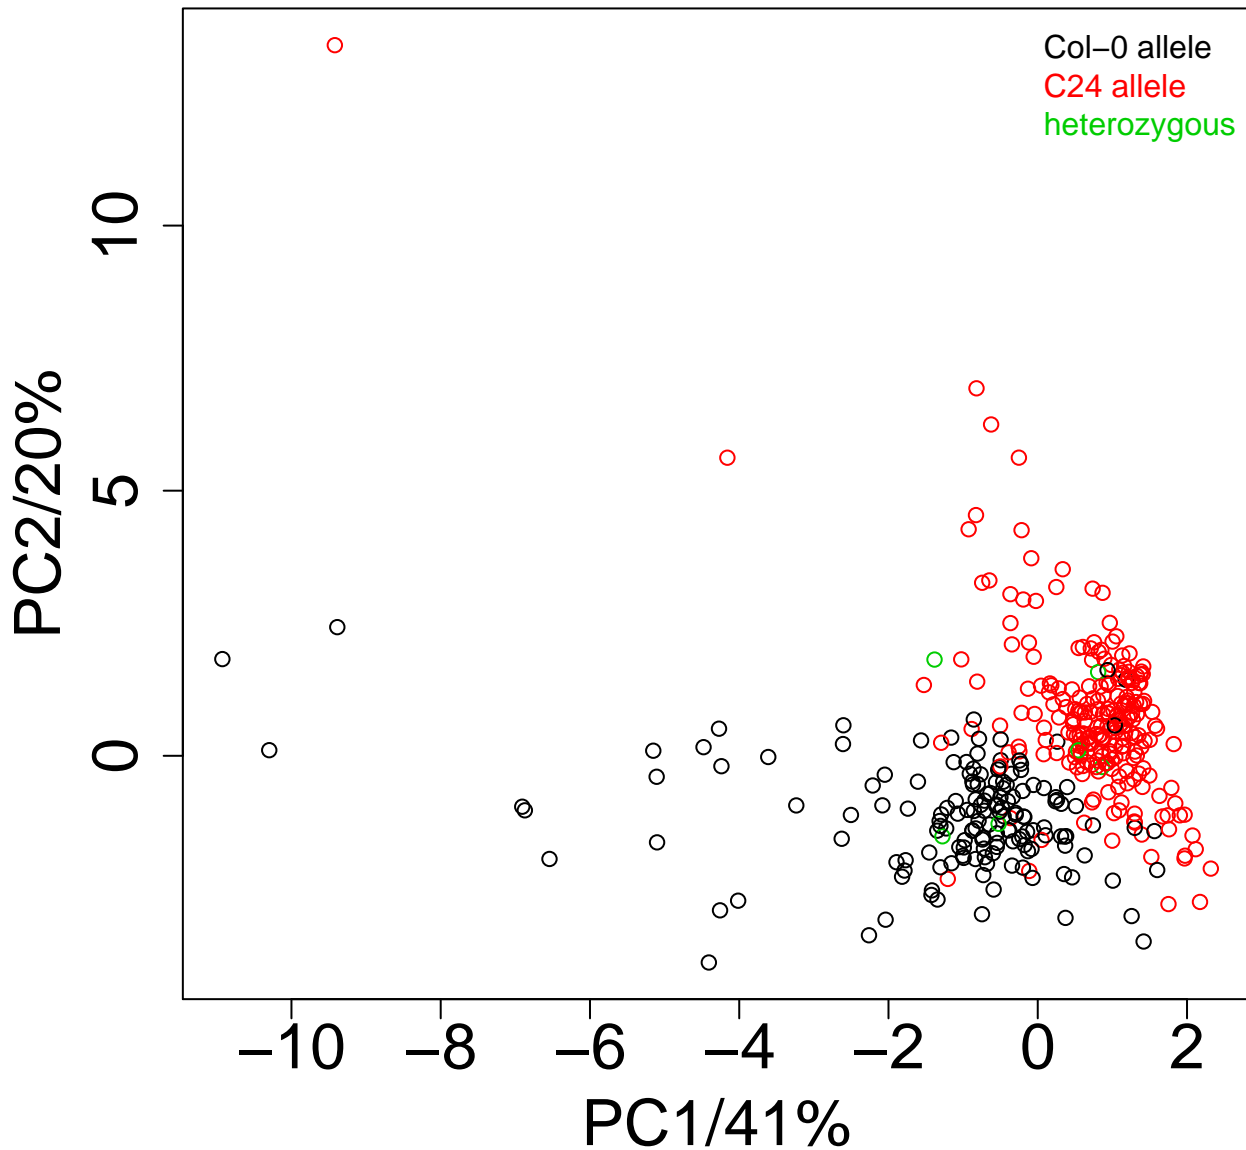

Chr. 4 Pos. 13.4 / MASC04685

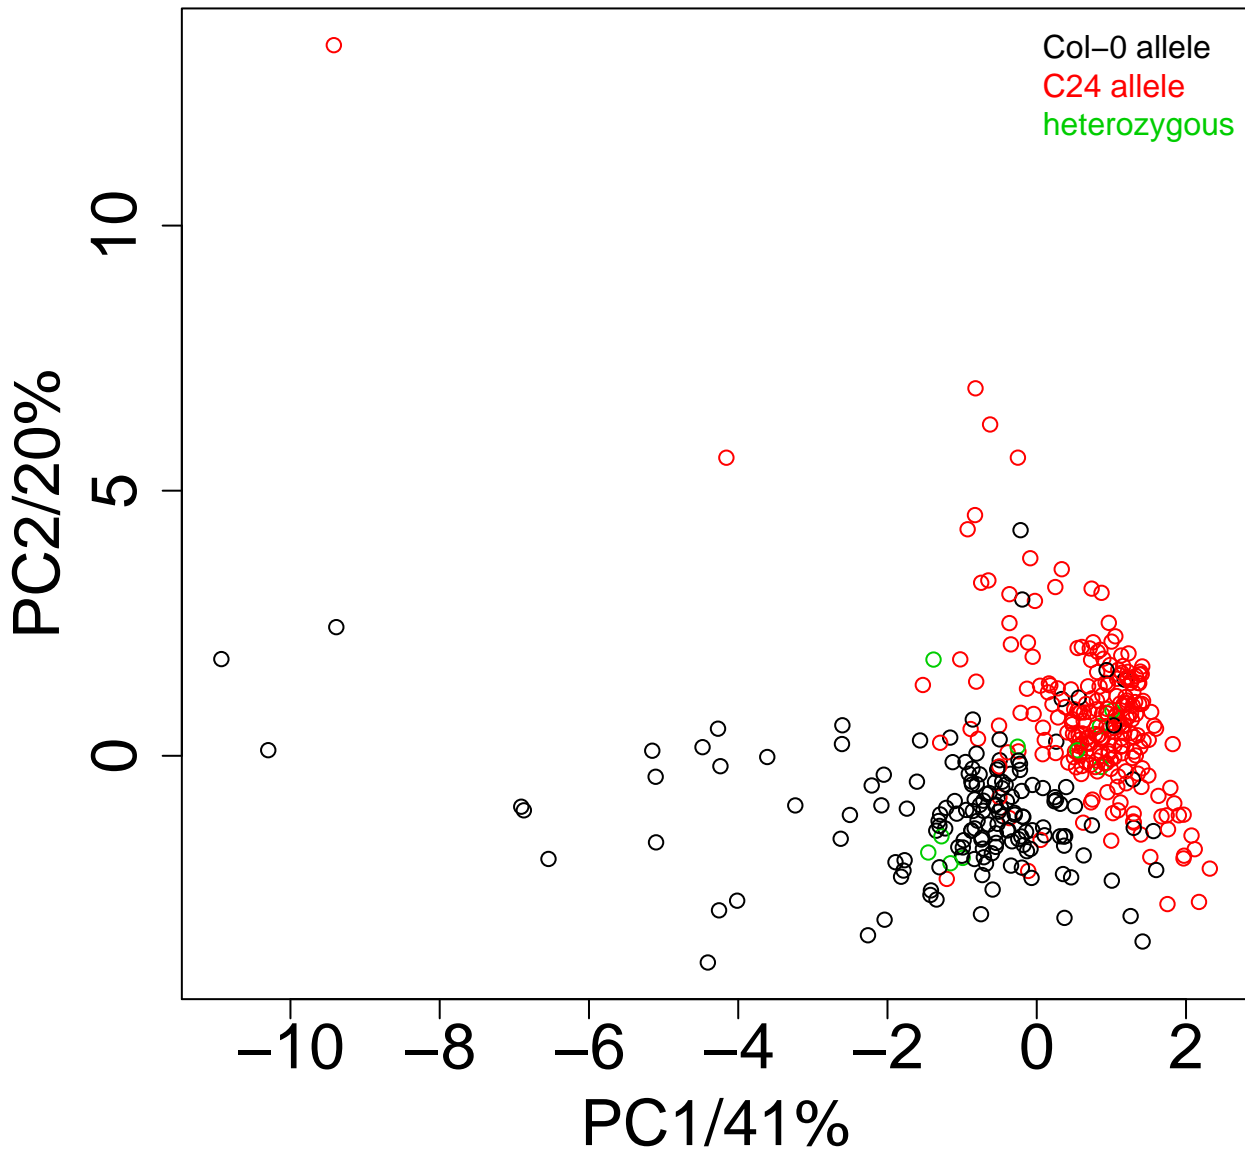

Chr. 4 Pos. 18 / nga8

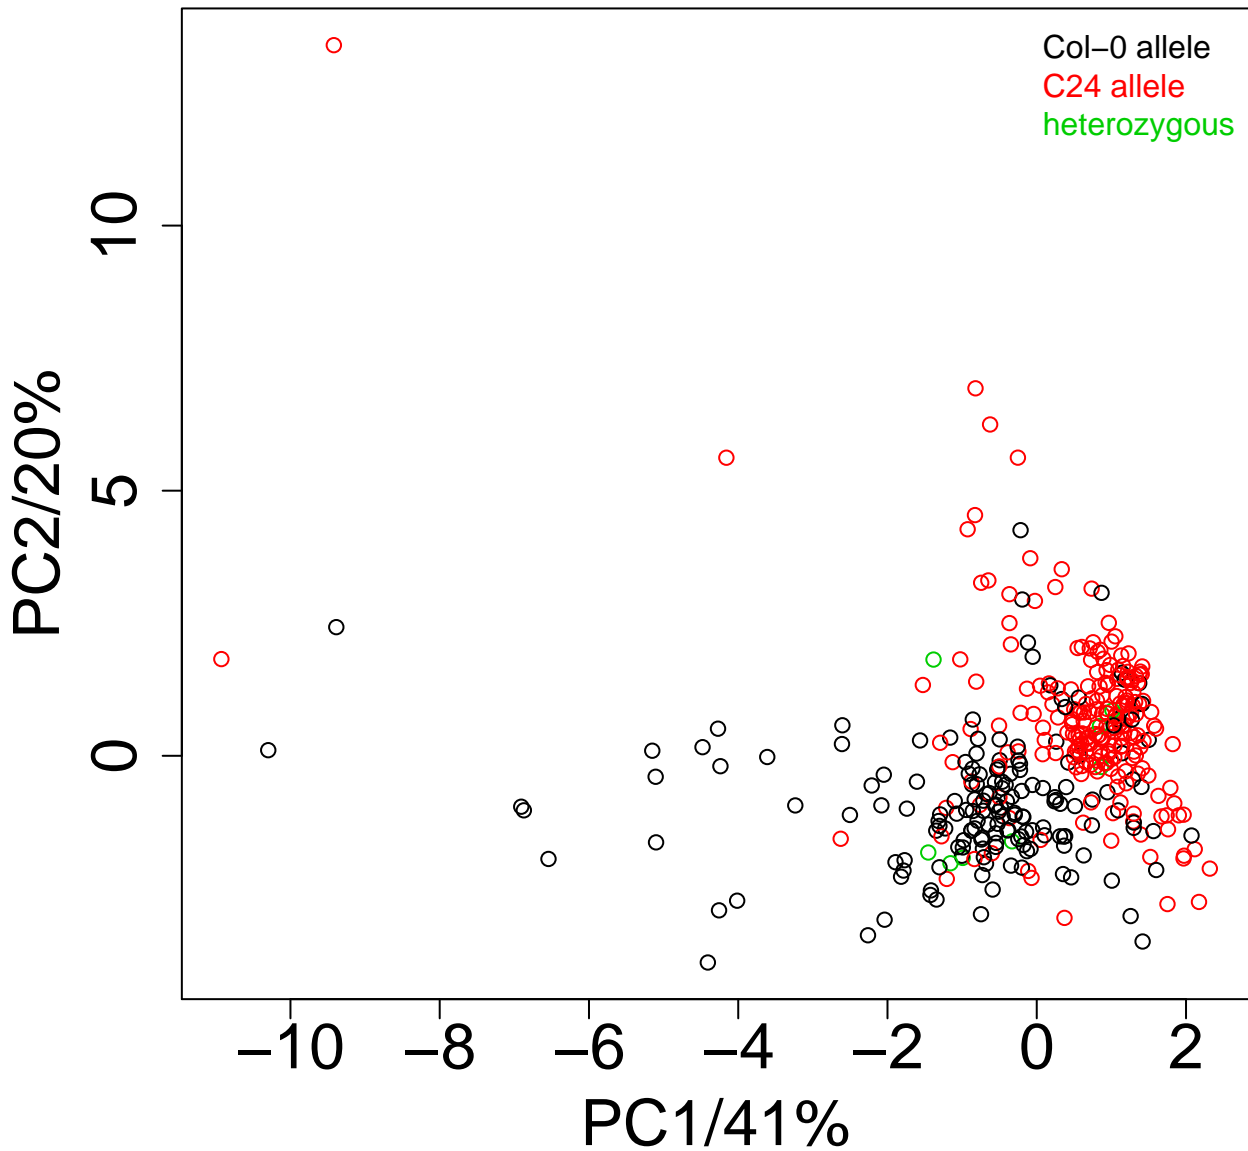



Chr. 4 Pos. 22.6 / MASC02668

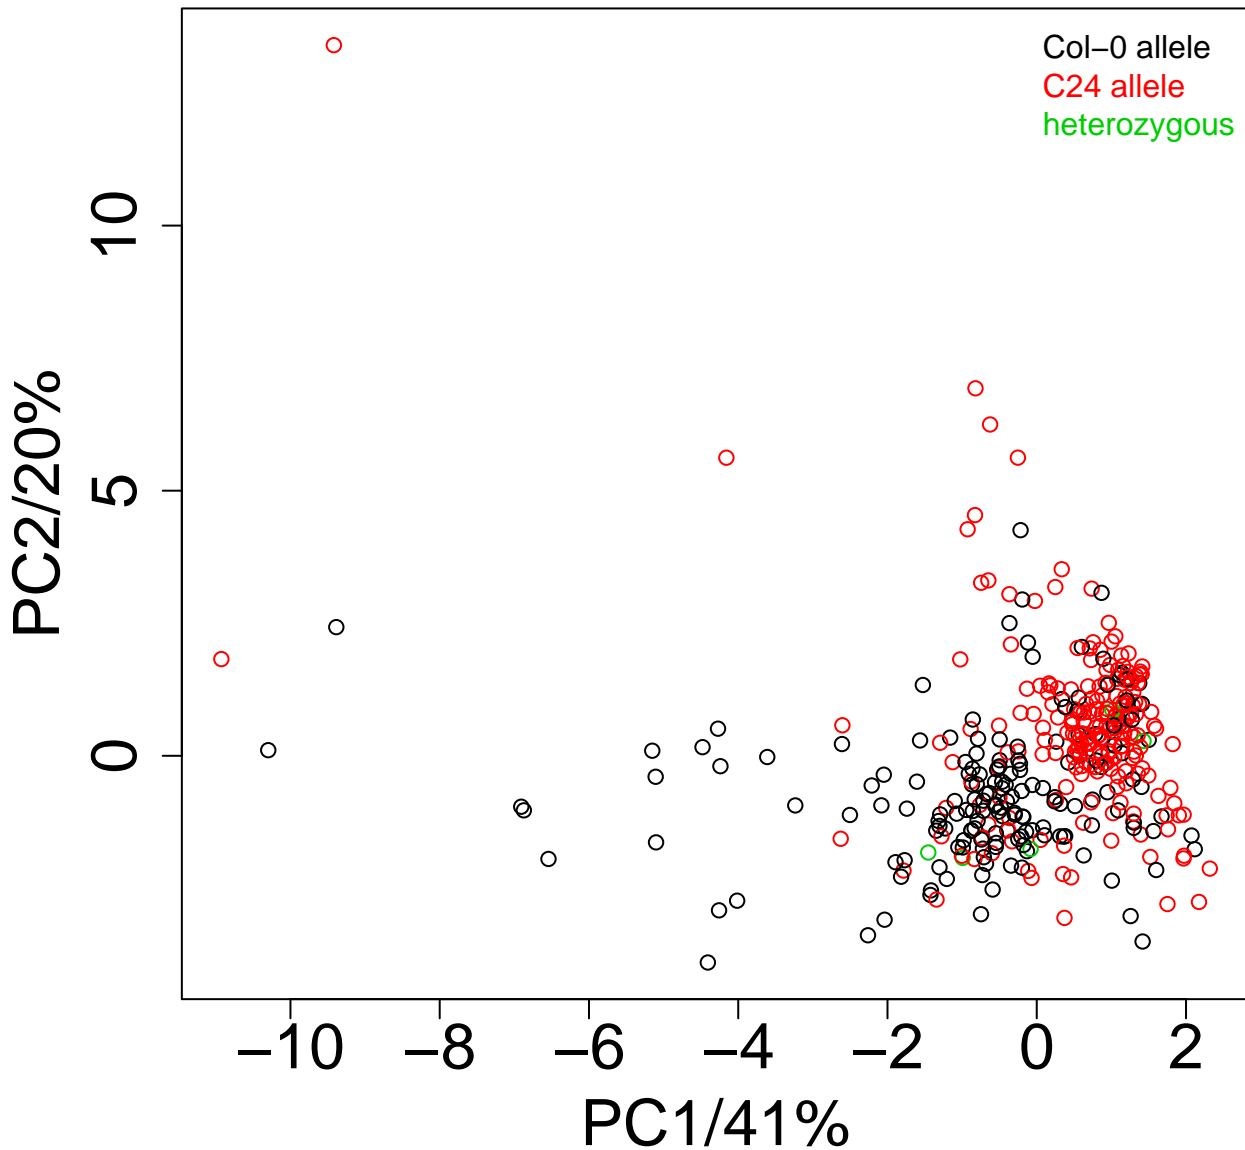

Chr. 4 Pos. 35.9 / MASC09213

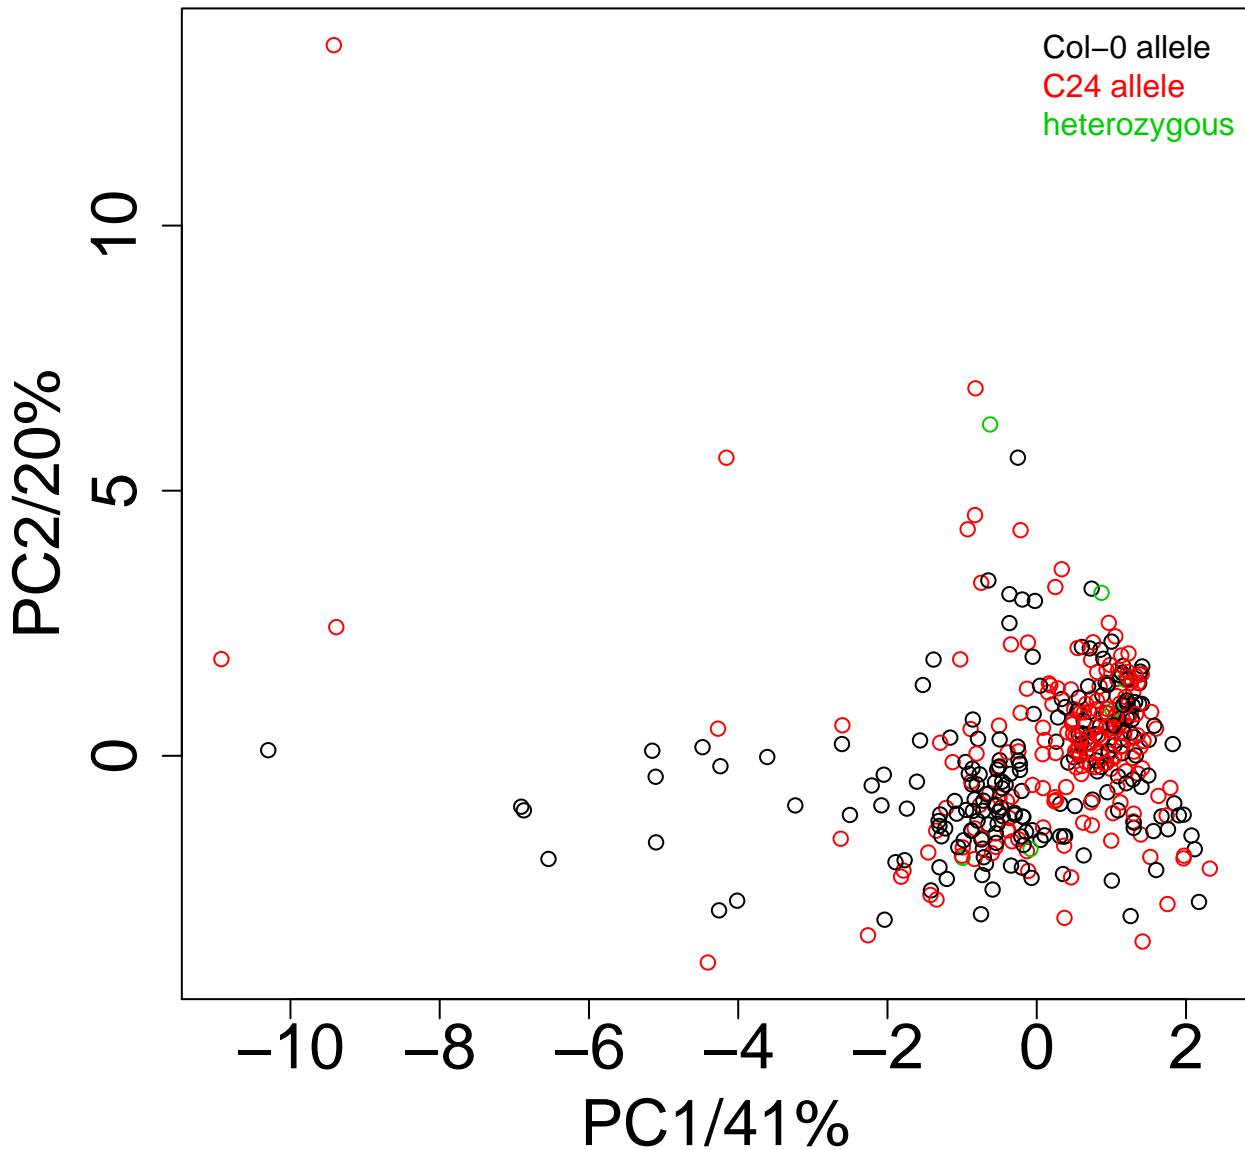

Chr. 4 Pos. 41.8 / MASC03275

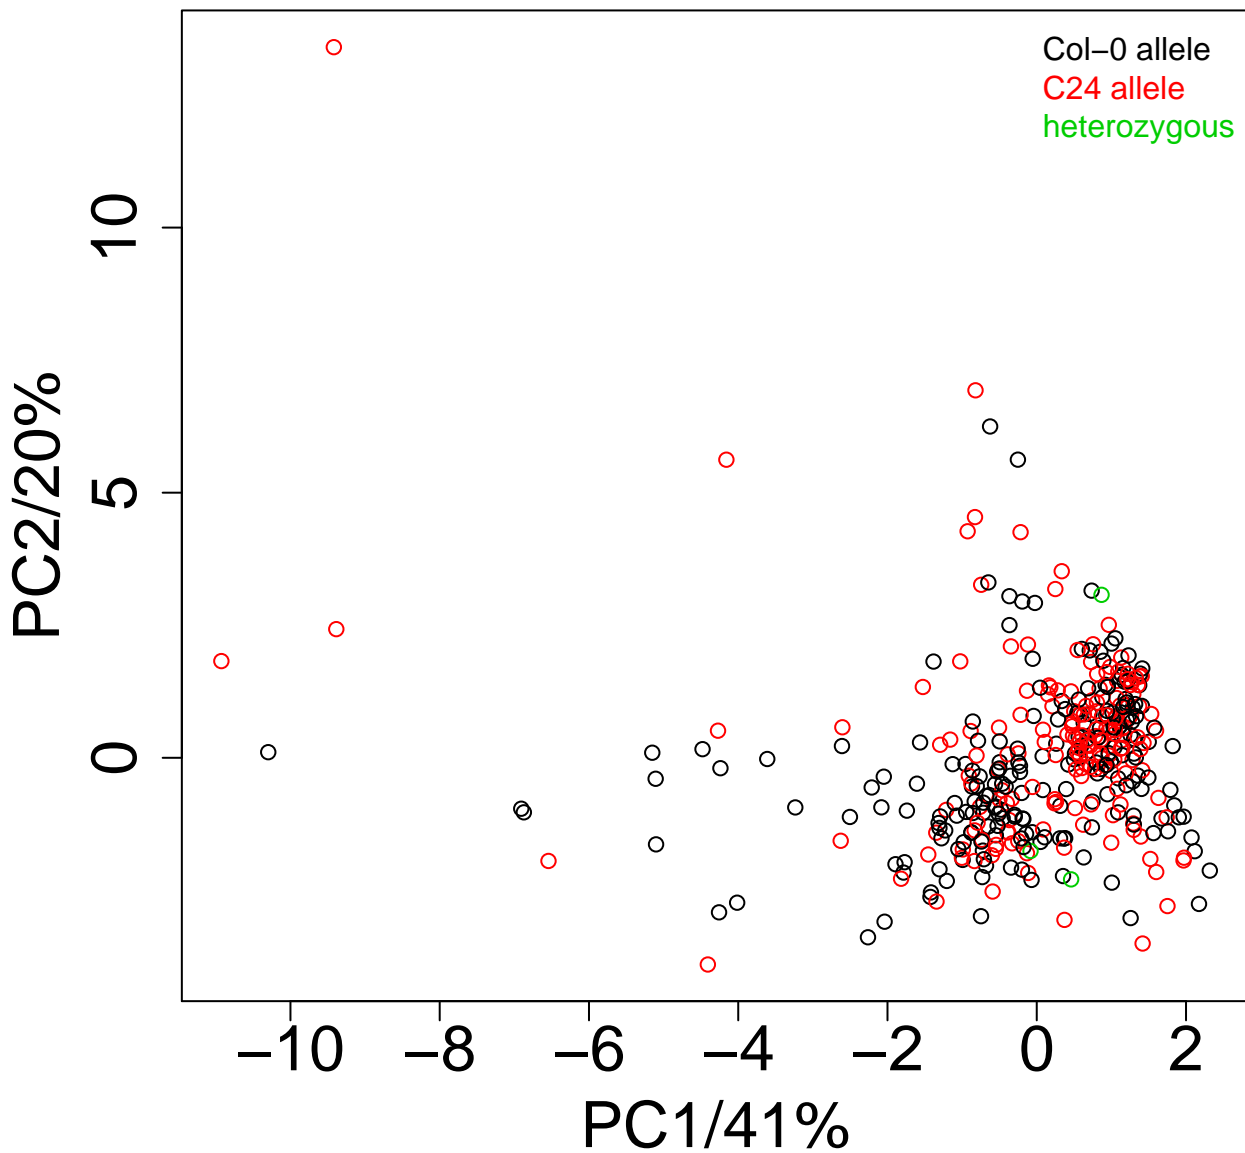

Chr. 4 Pos. 43.1 / MASC03263

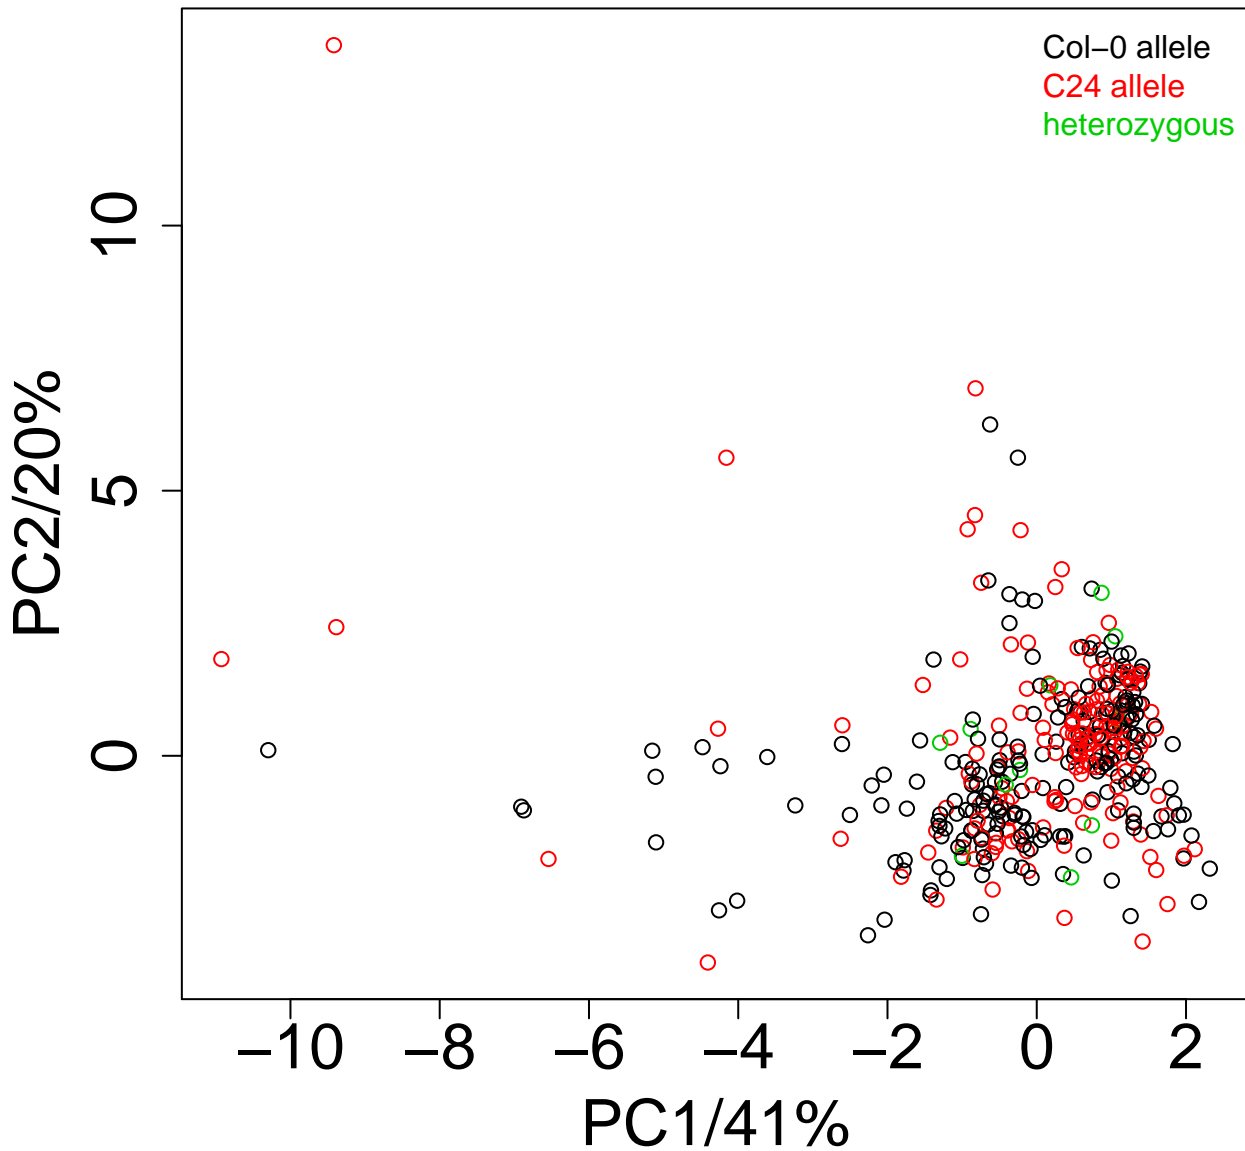

Chr. 4 Pos. 47.3 / F24J7ID

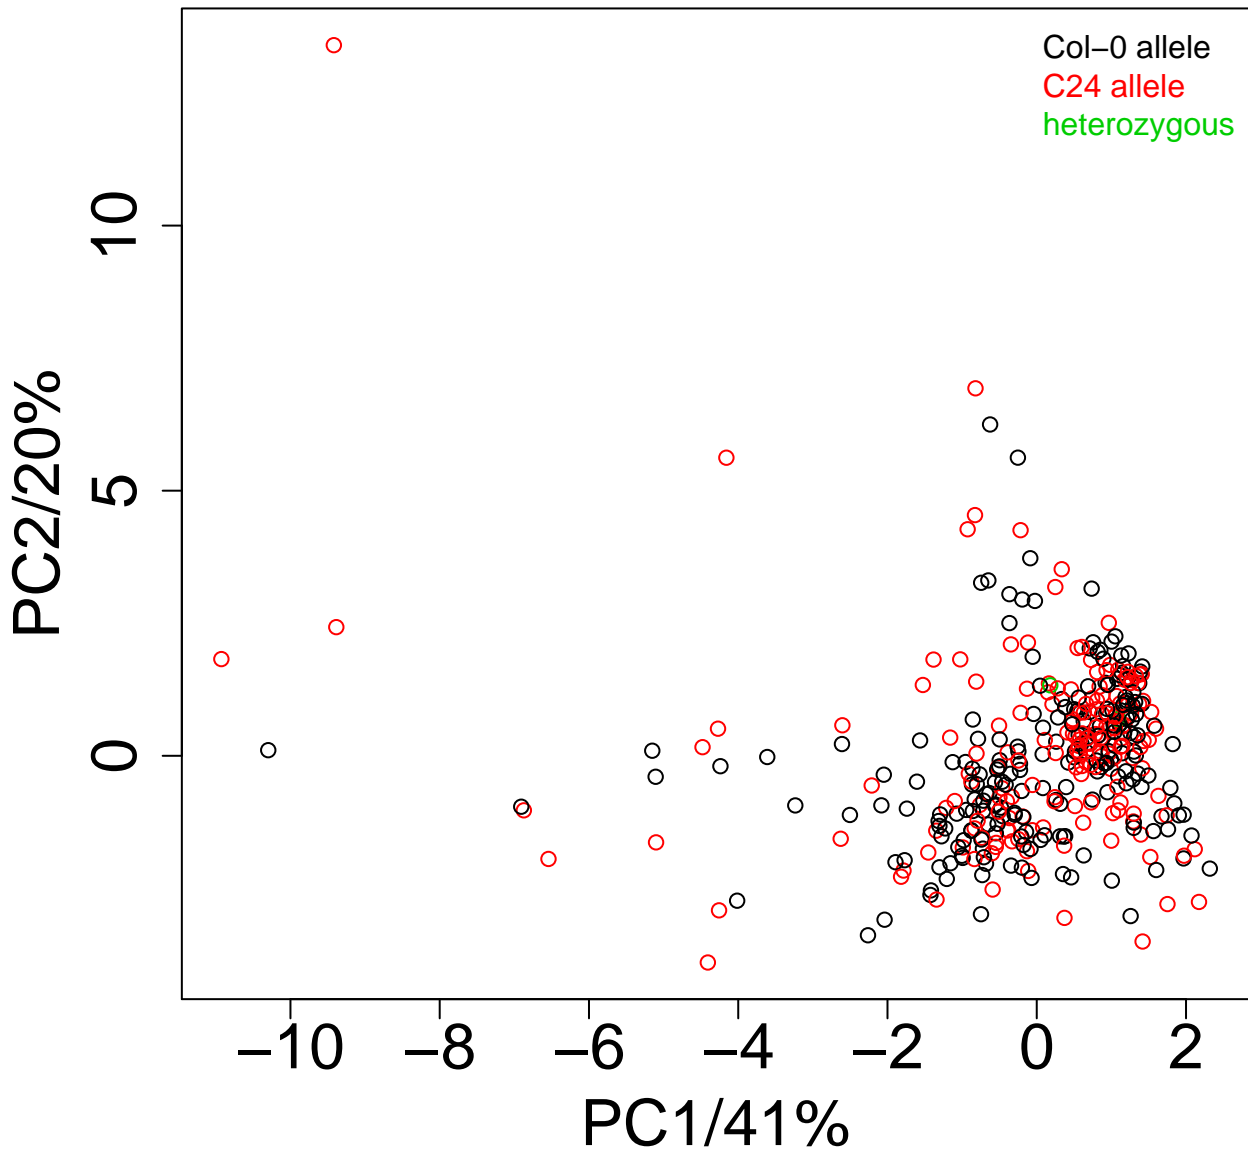

Chr. 4 Pos. 47.3 / MASC02548

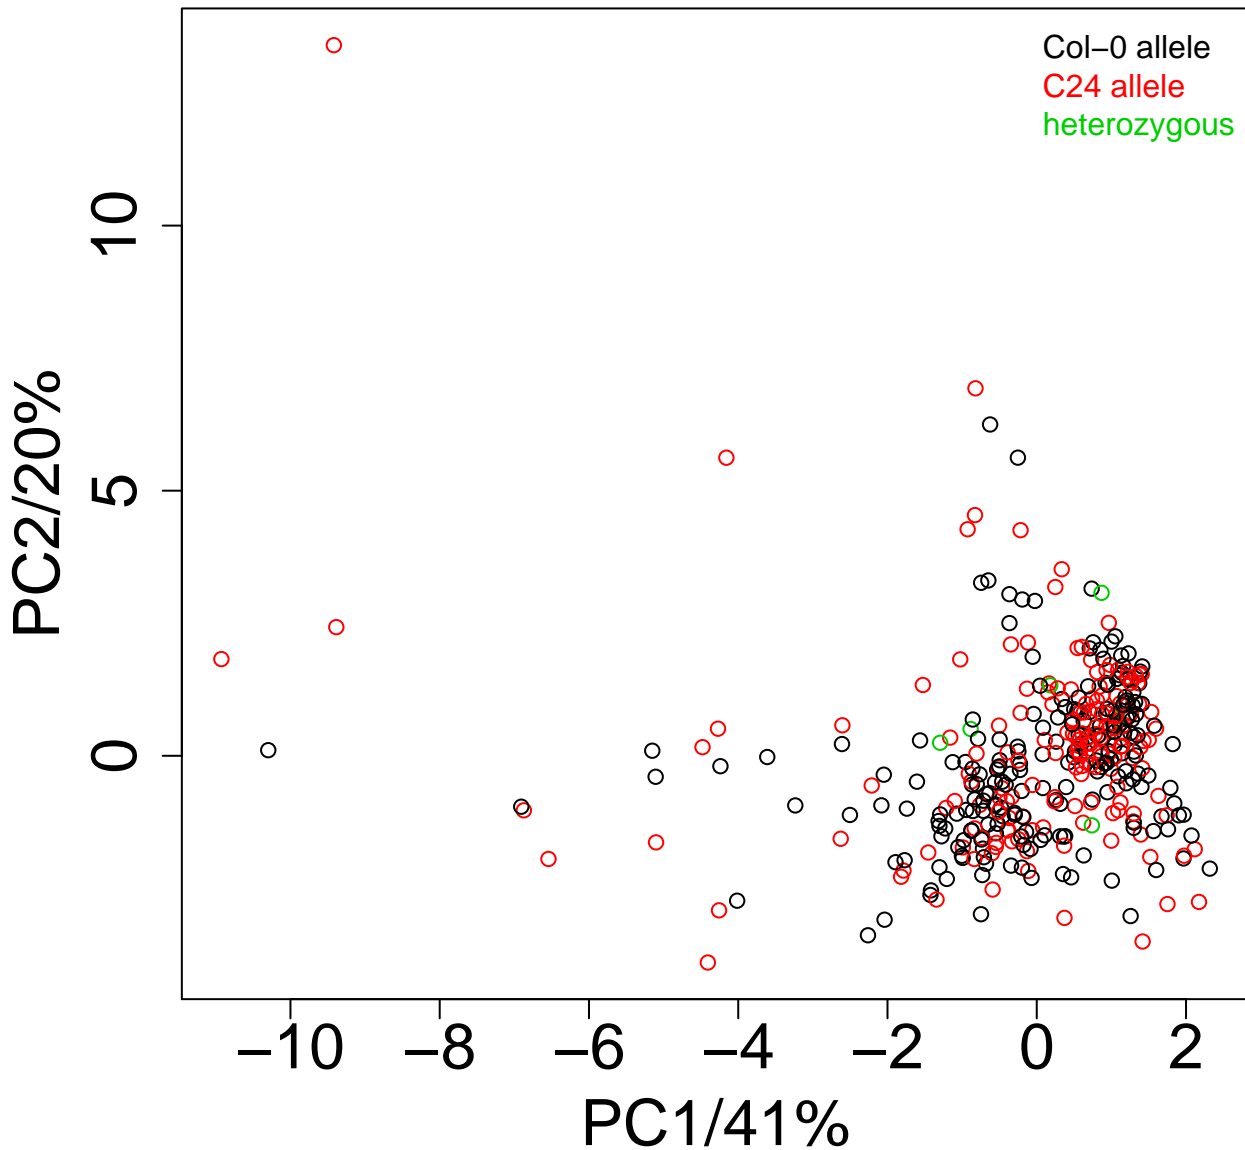

Chr. 4 Pos. 53.1 / MASC04642

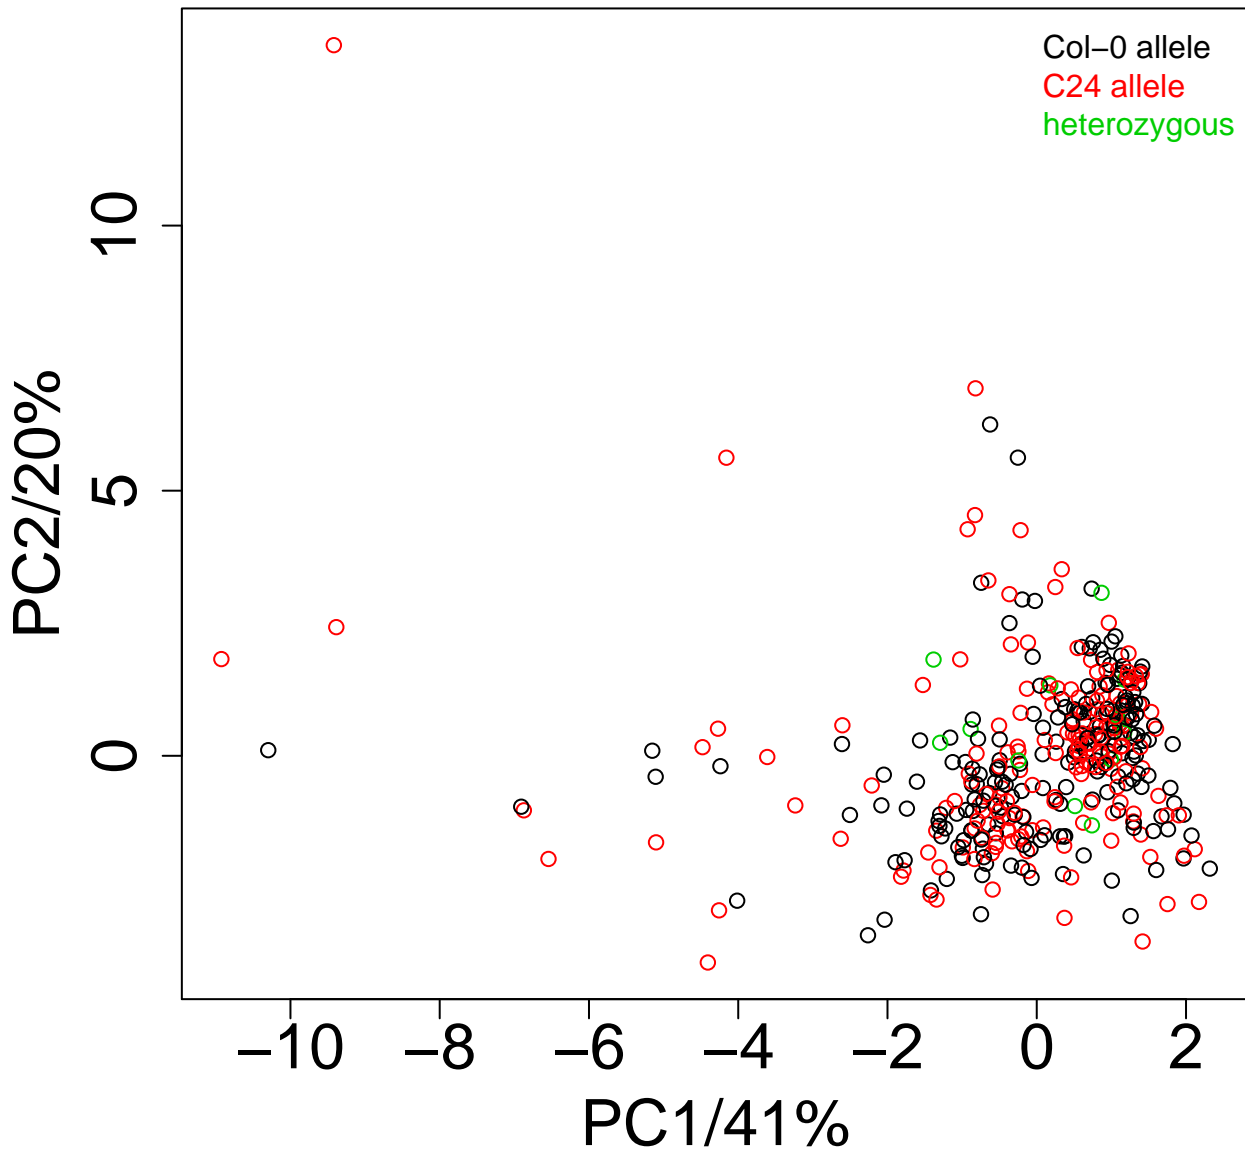

Chr. 4 Pos. 56.4 / MASC09214

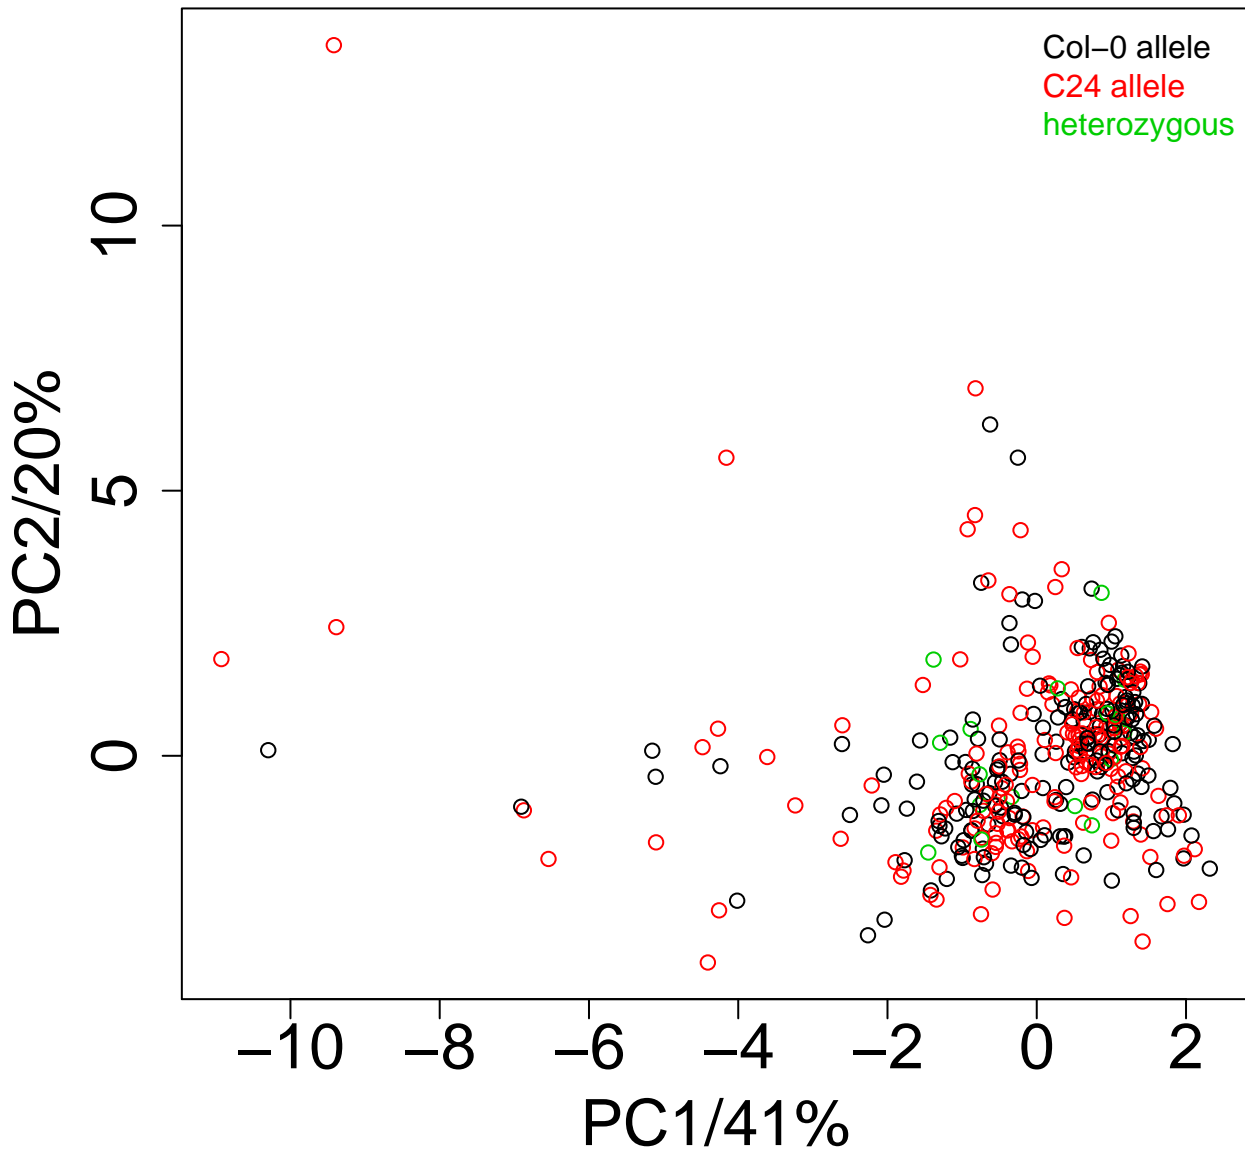



Chr. 4 Pos. 58.1 / MASC09215

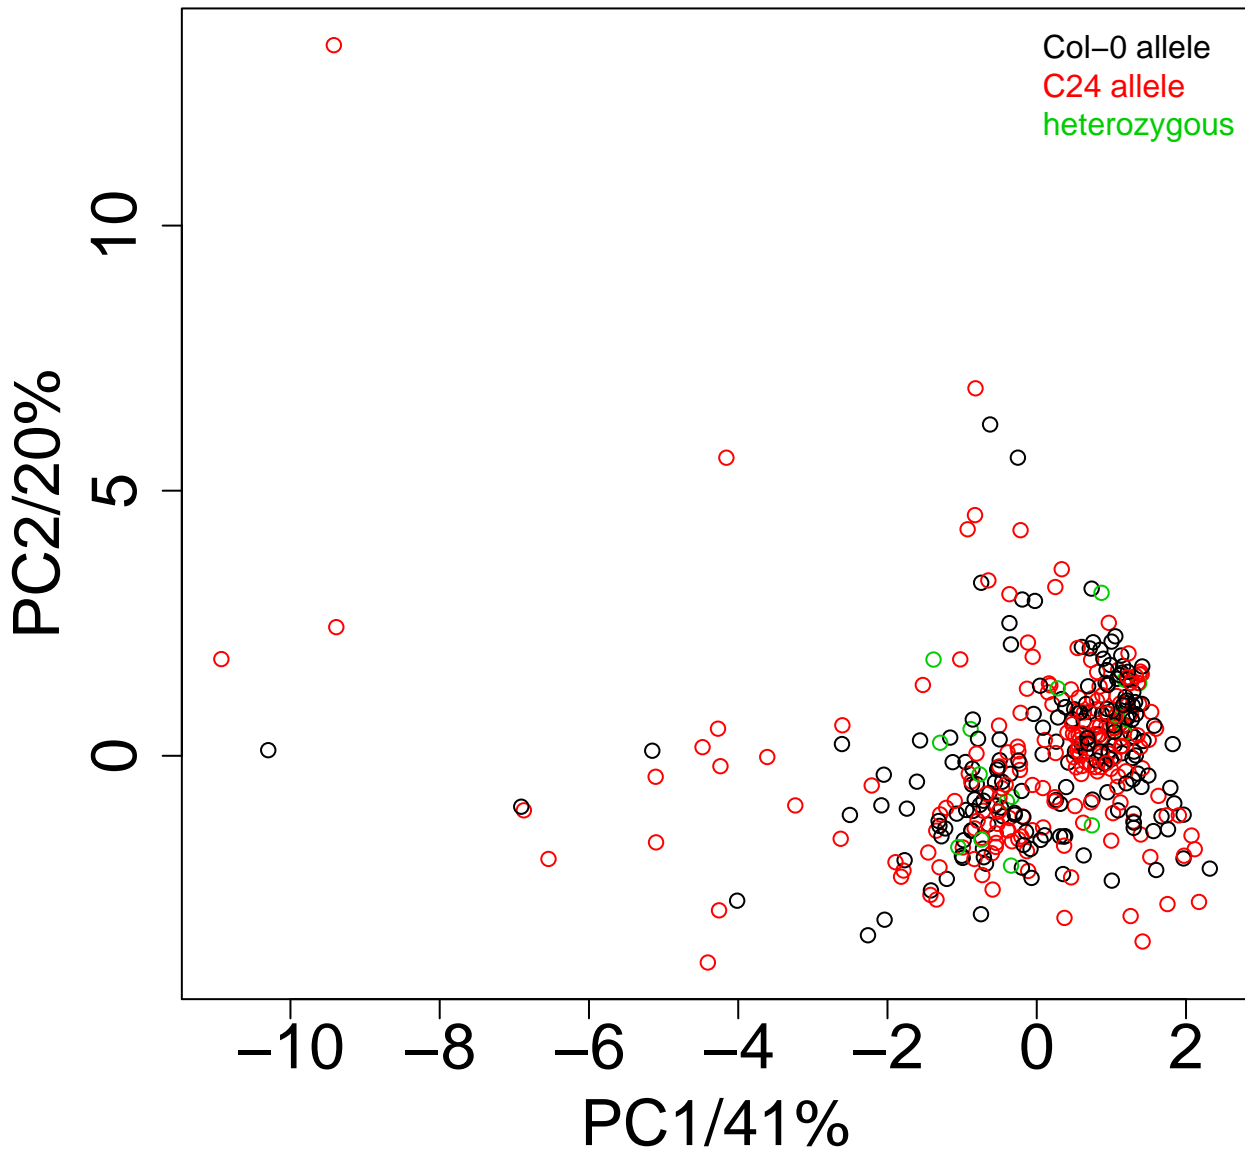

Chr. 4 Pos. 58.2 / M4\_7366

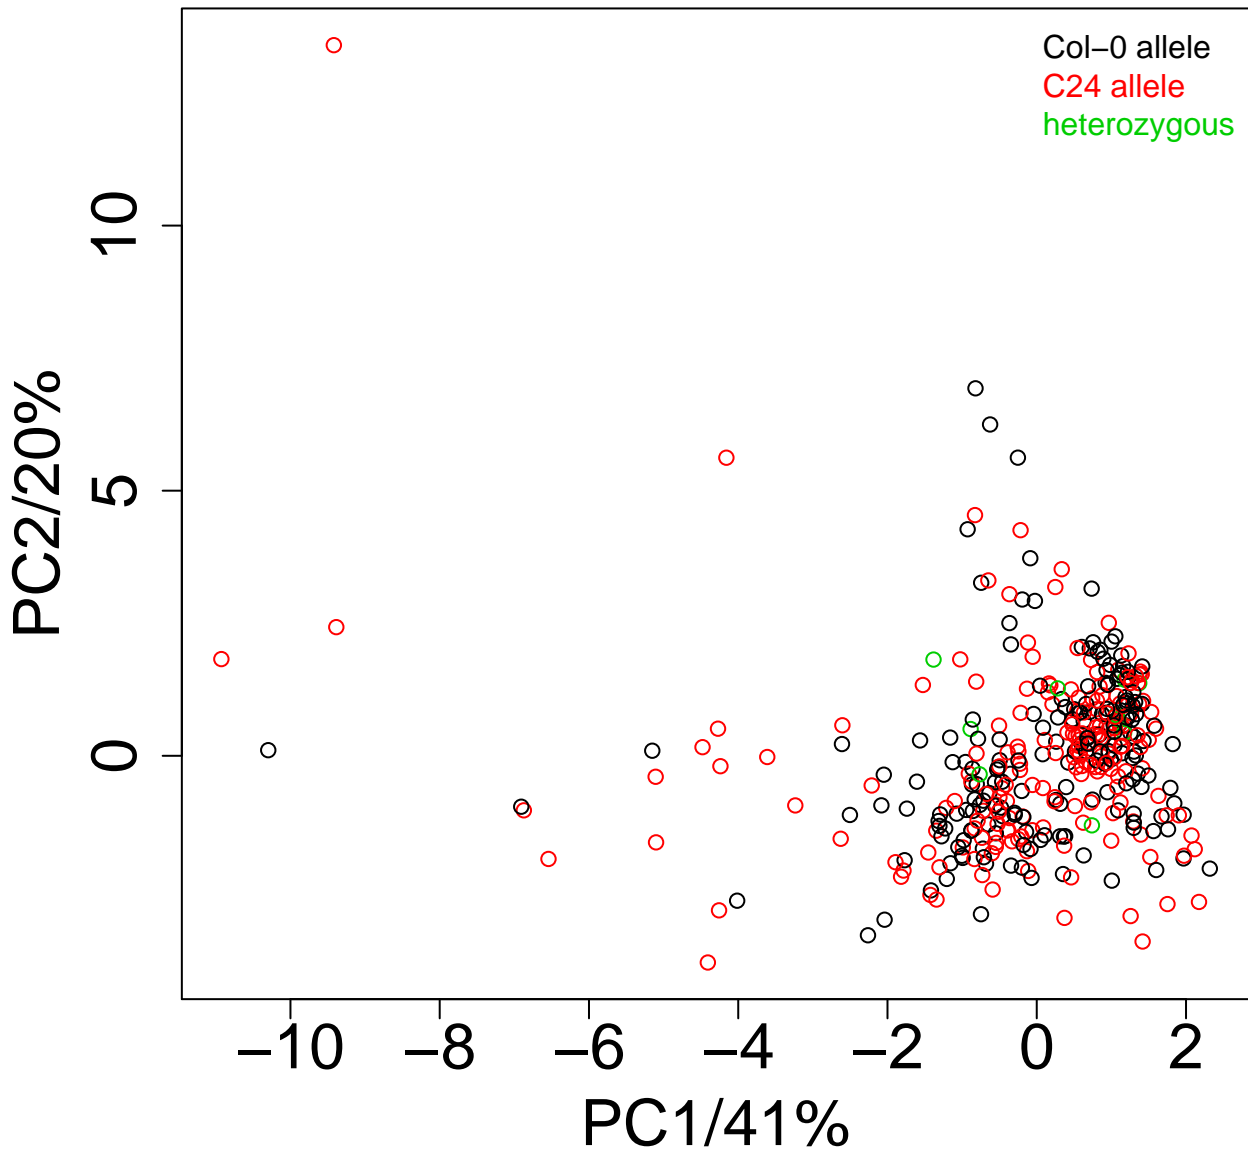

Chr. 4 Pos. 60 / MASC03154

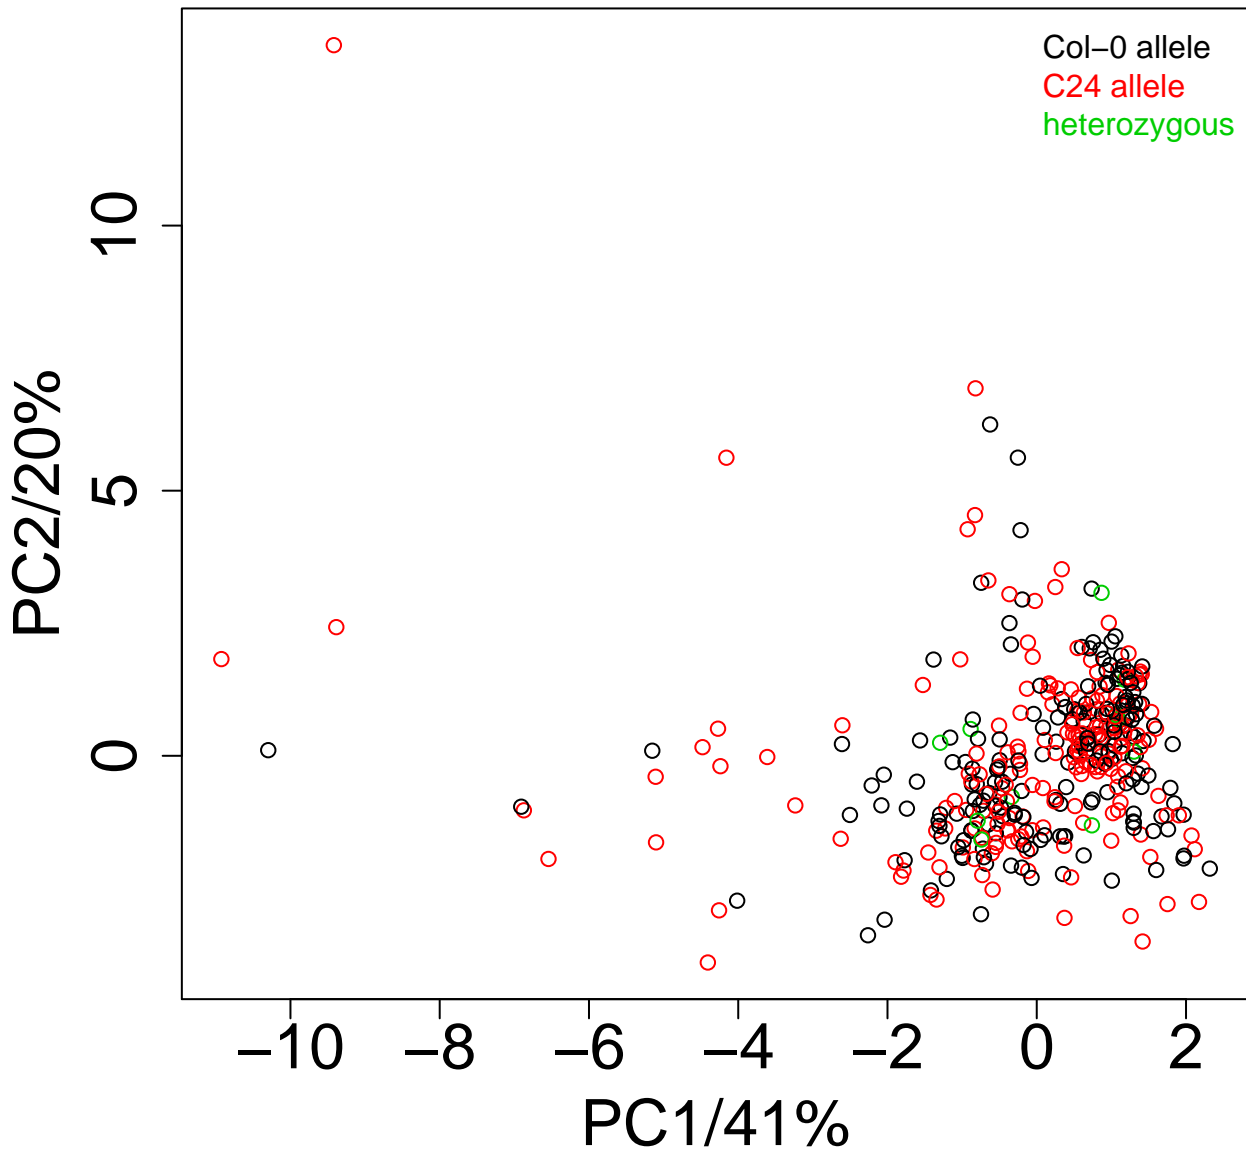

Chr. 4 Pos. 62.1 / MASC04005

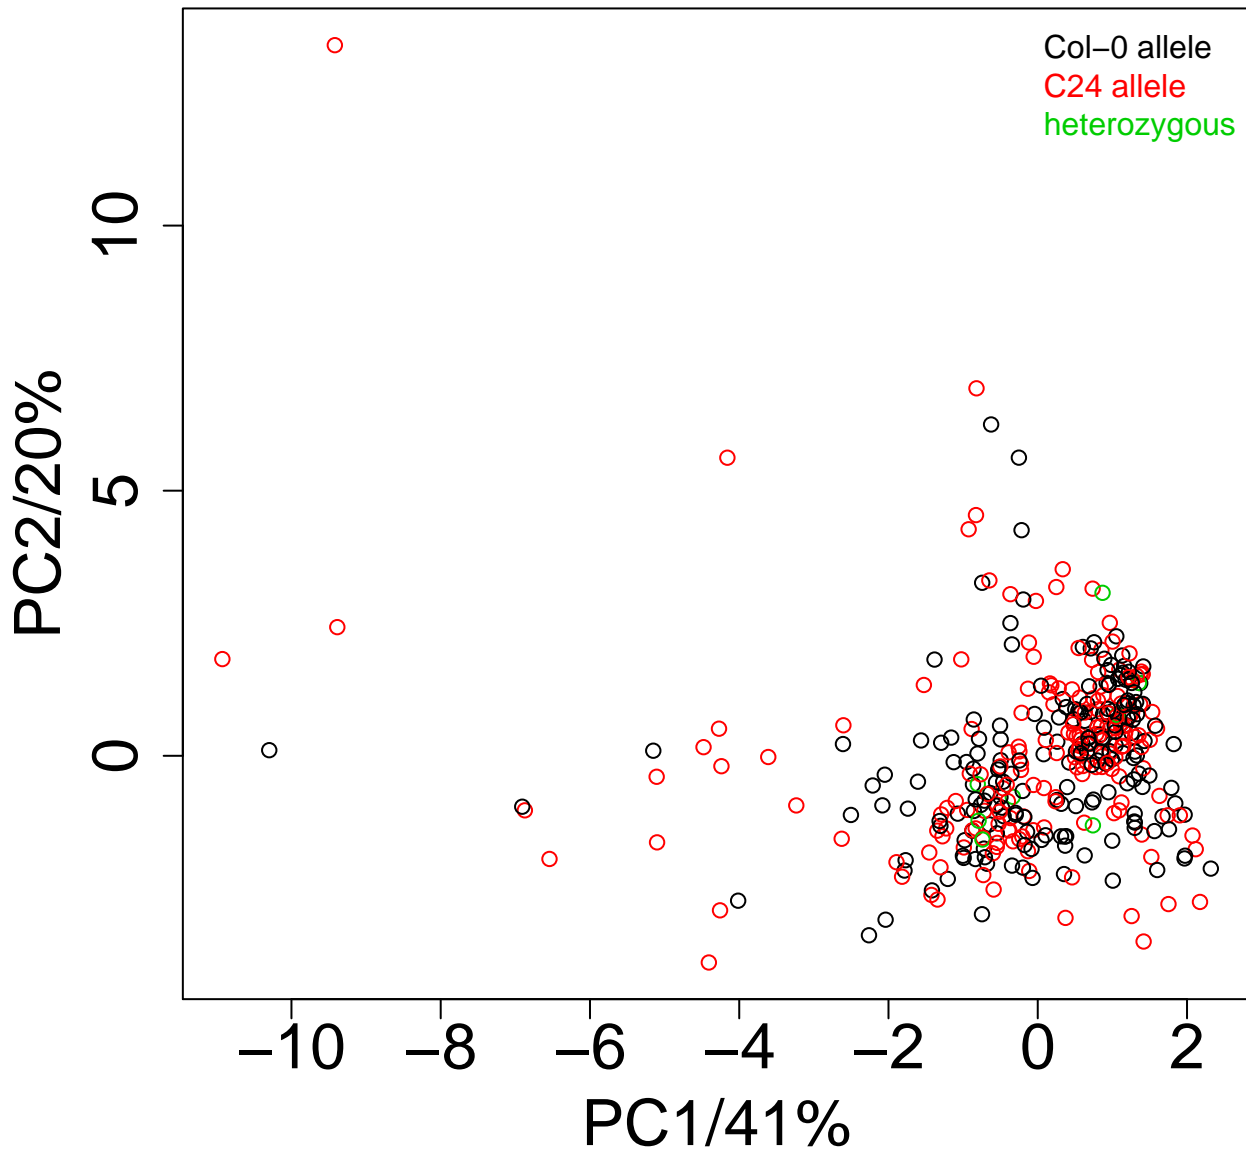

Chr. 4 Pos. 64.5 / MASC04199

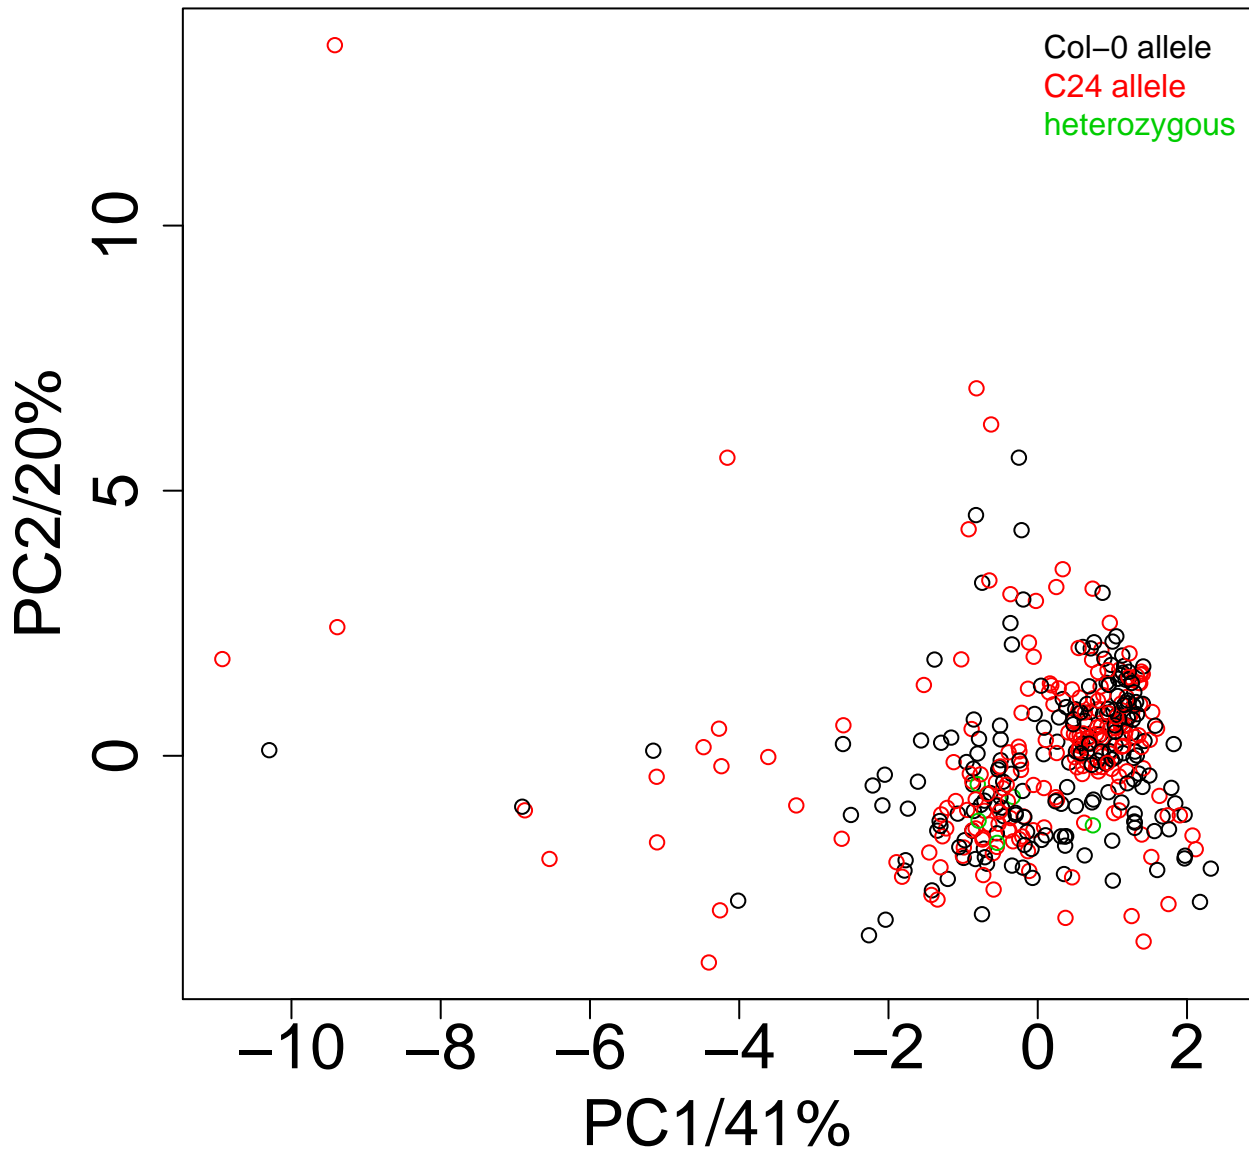



Chr. 4 Pos. 71.4 / M4\_9963

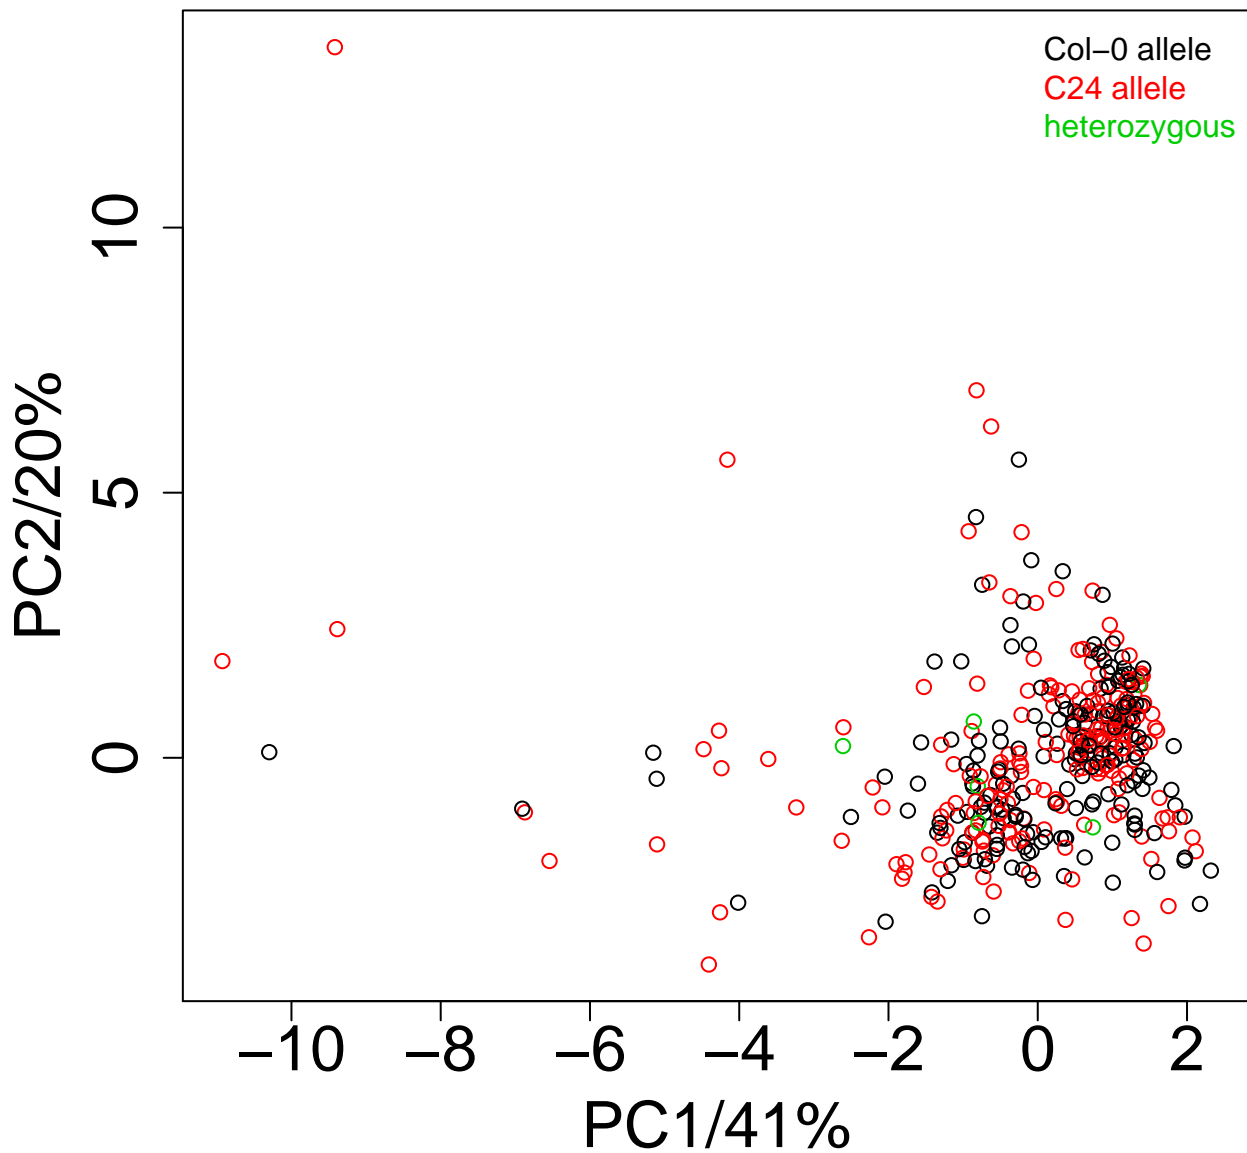

Chr. 4 Pos. 71.4 / MASC05258

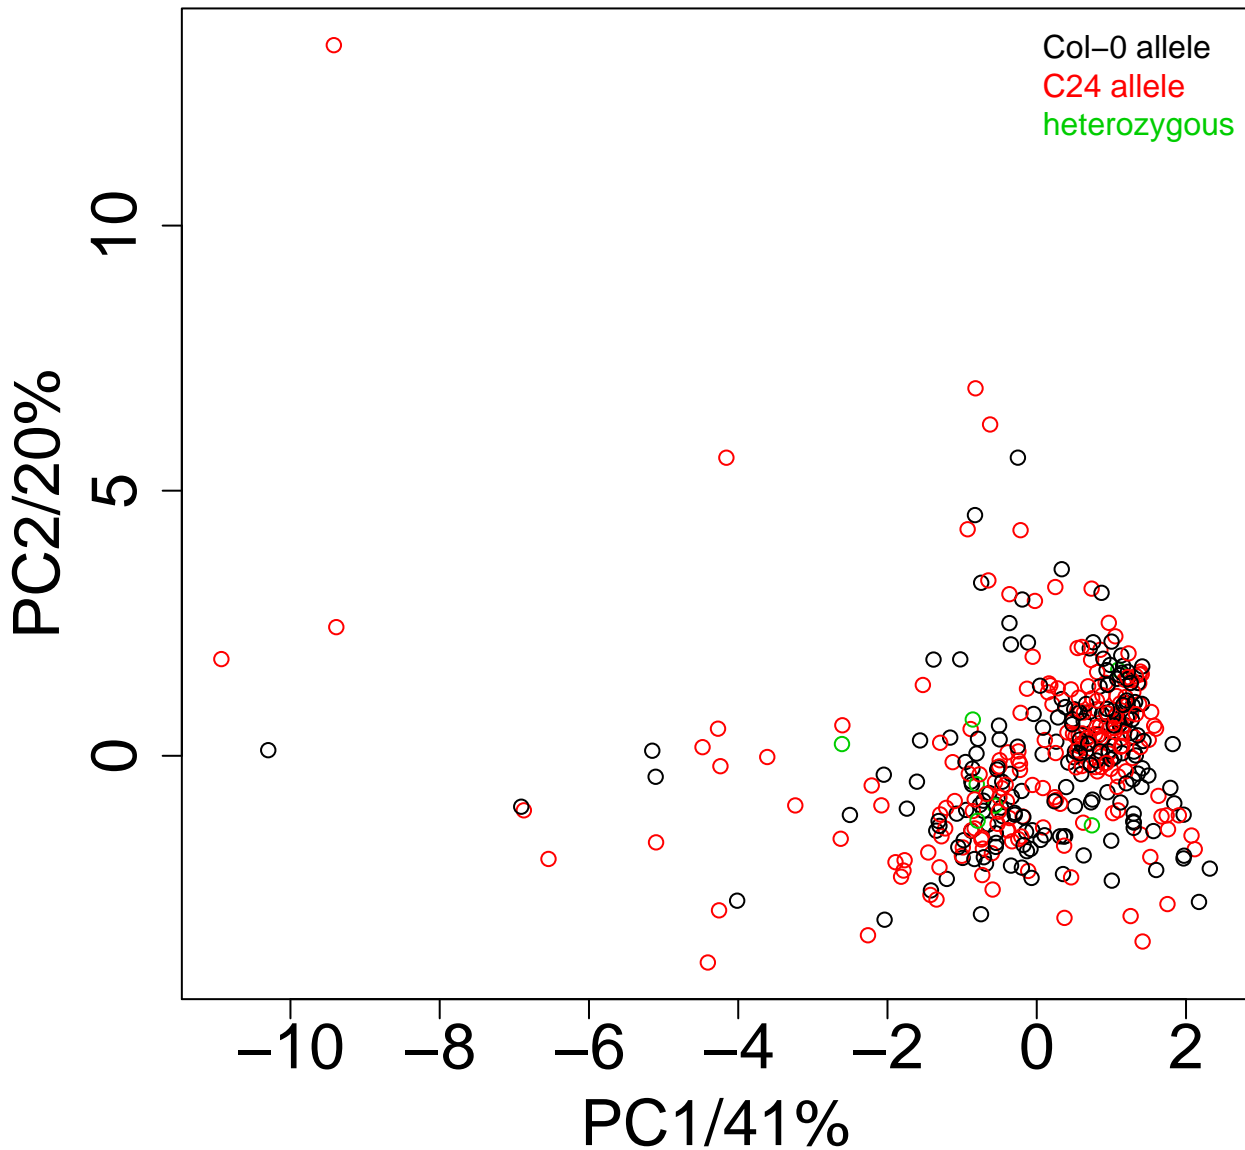



Chr. 5 Pos. 0 / MASC00144

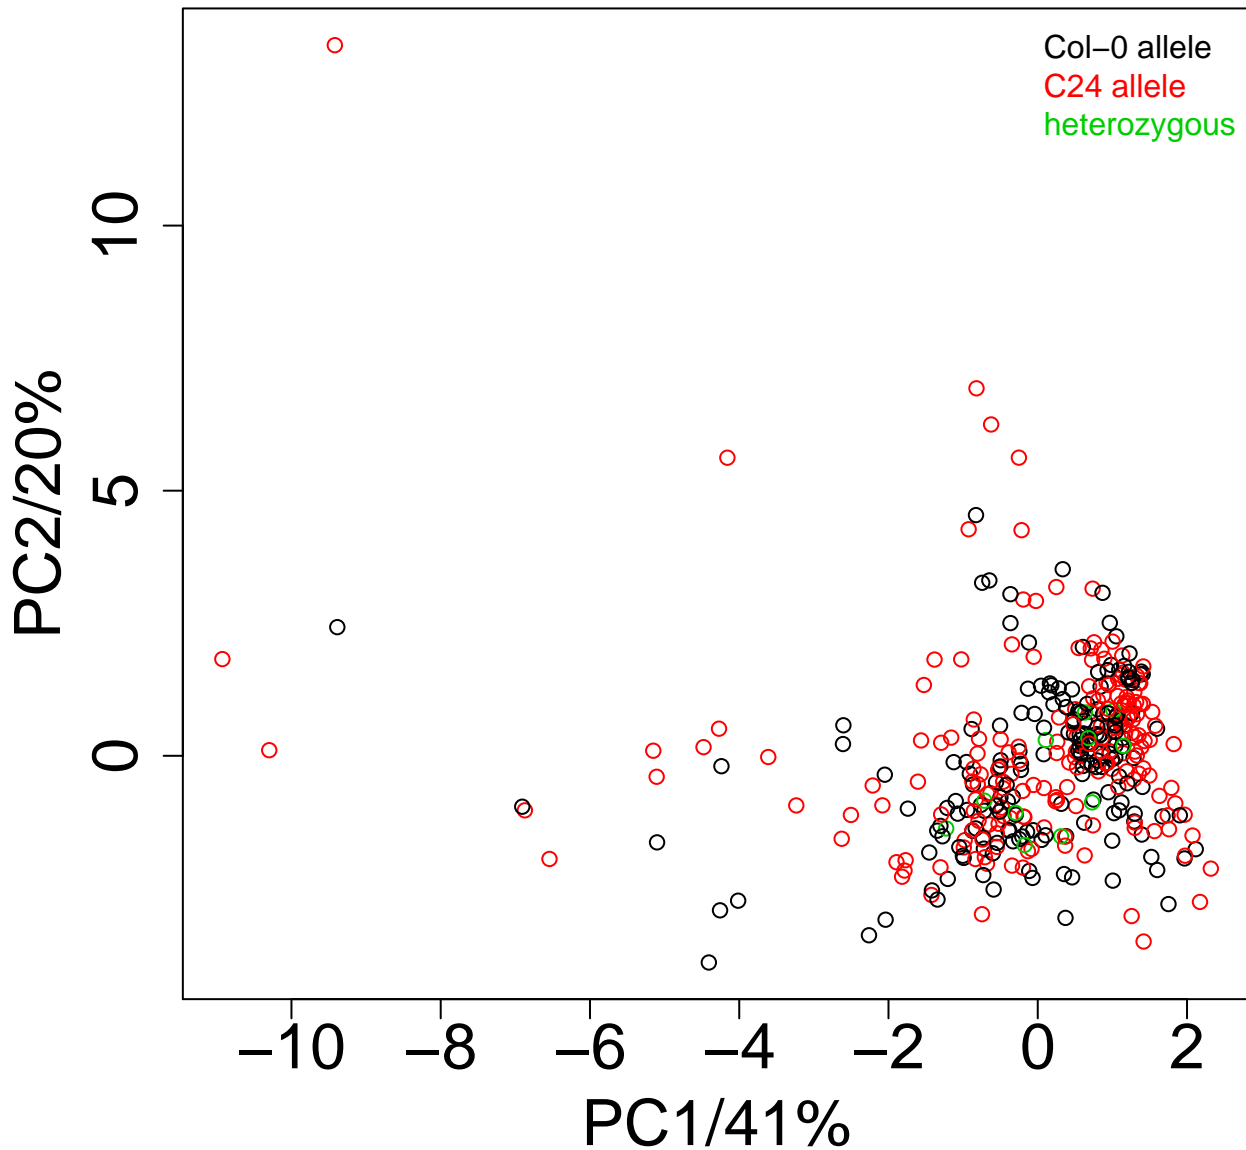

Chr. 5 Pos. 2.5 / MASC04860

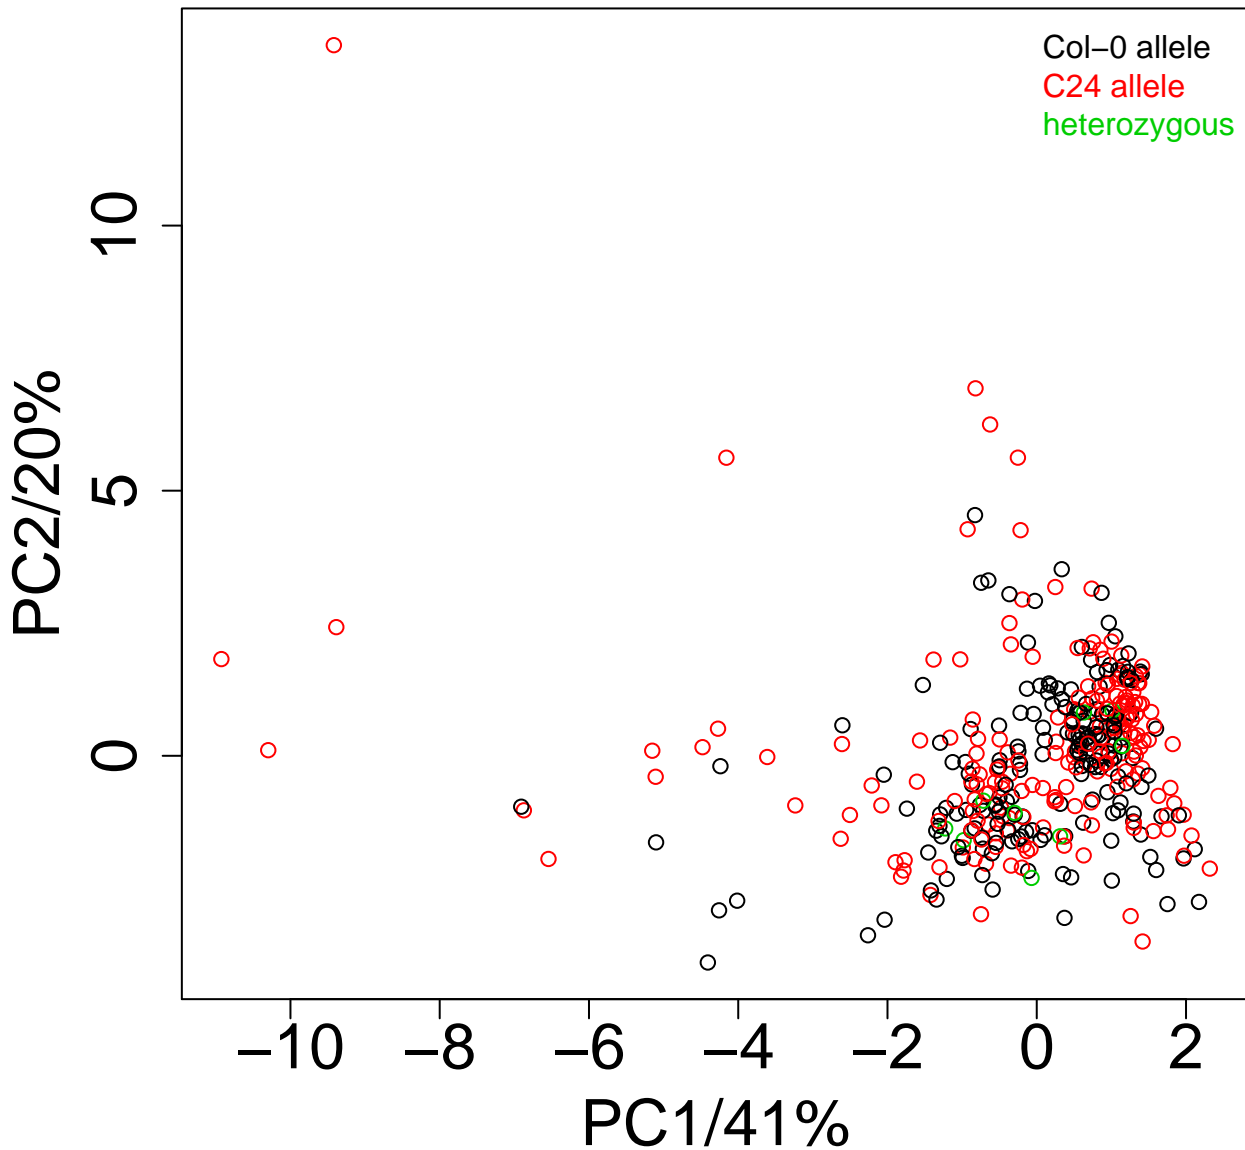

Chr. 5 Pos. 5.3 / MASC04531

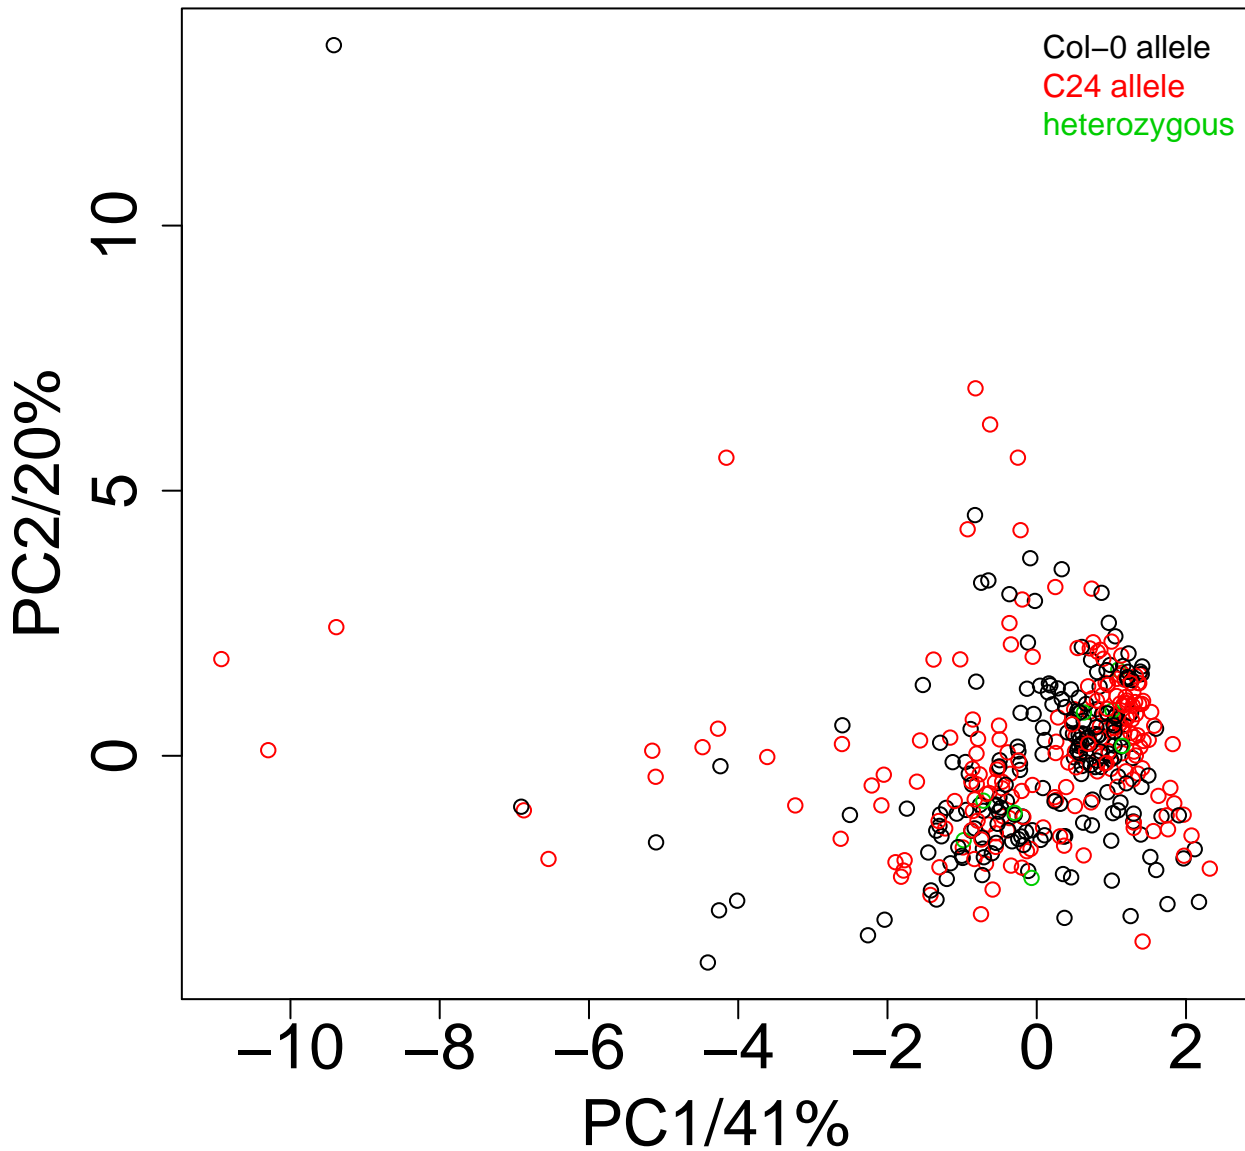

Chr. 5 Pos. 9 / MASC09207

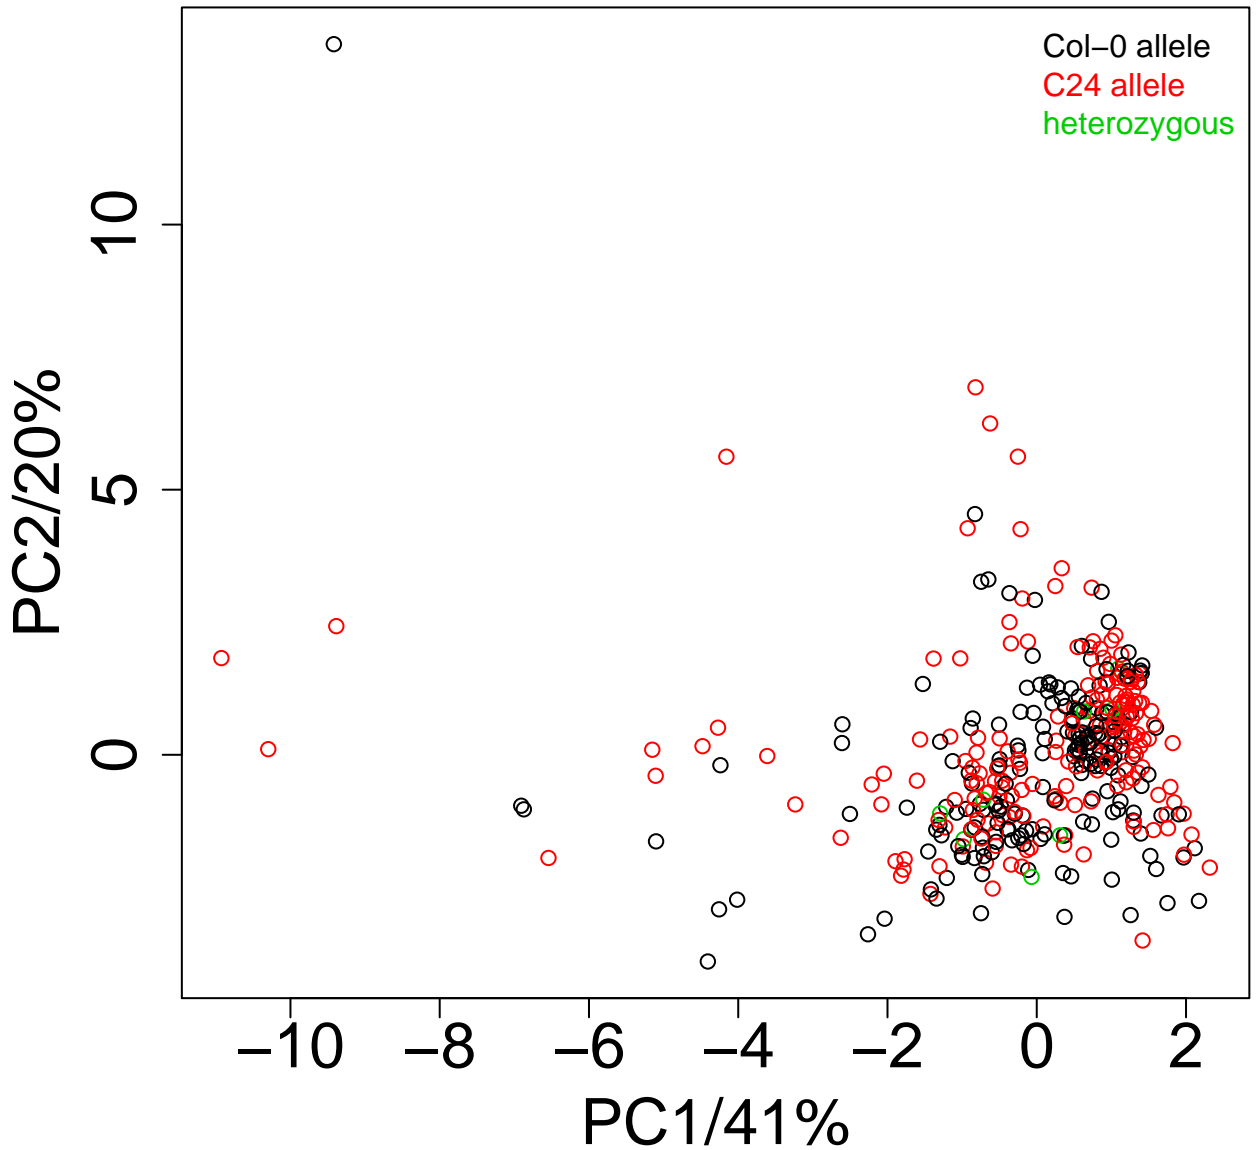

Chr. 5 Pos. 12.4 / MASC05127

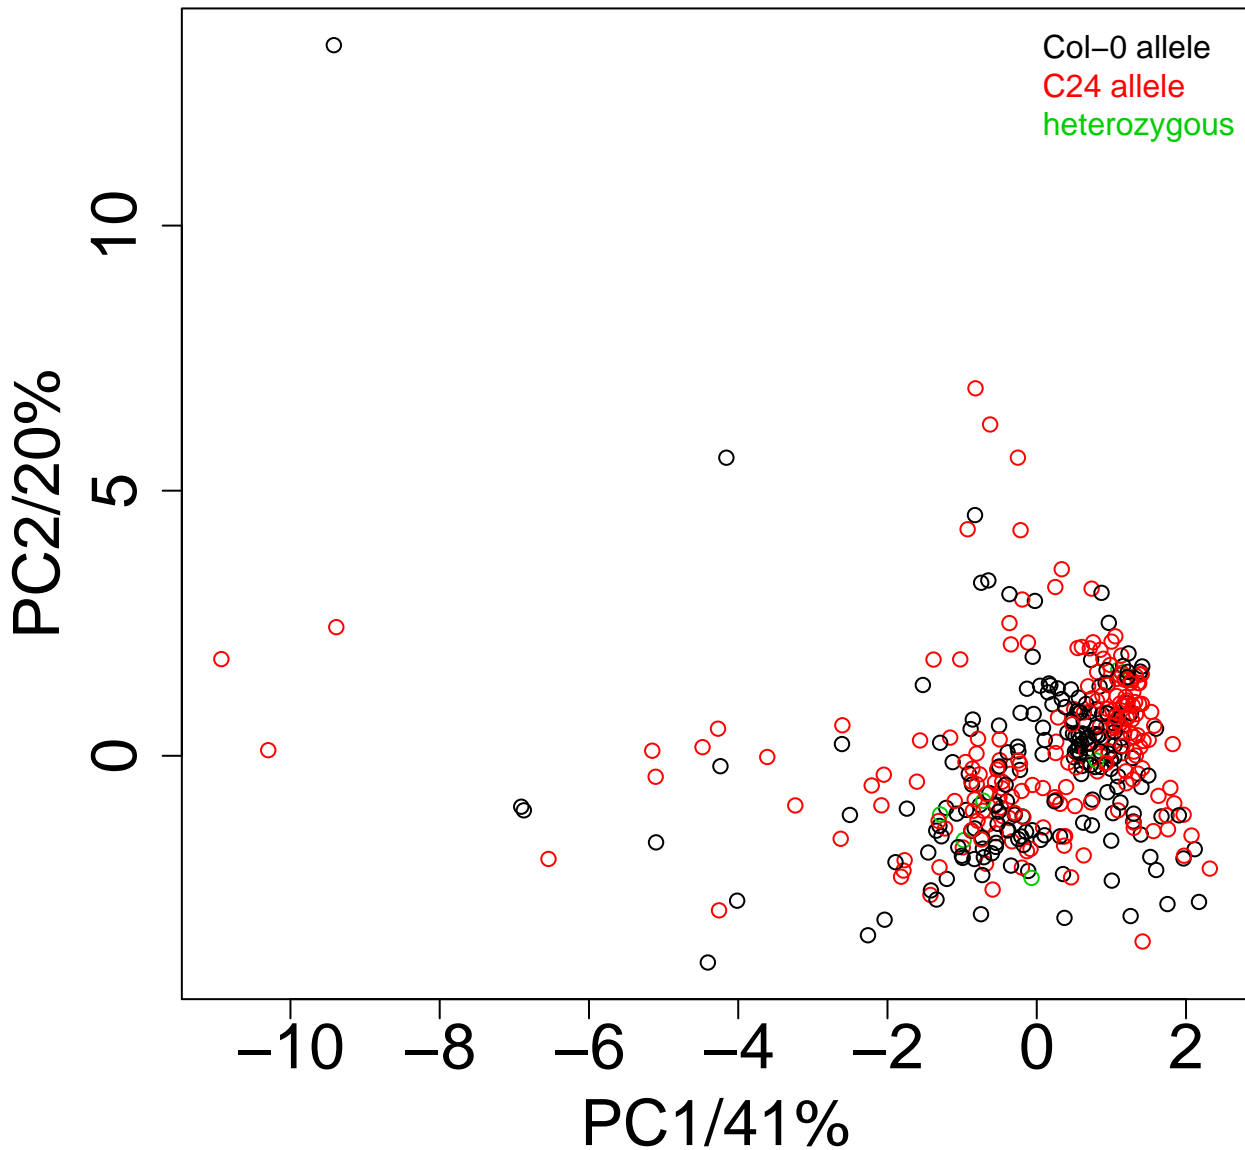

Chr. 5 Pos. 12.6 / M5\_1629

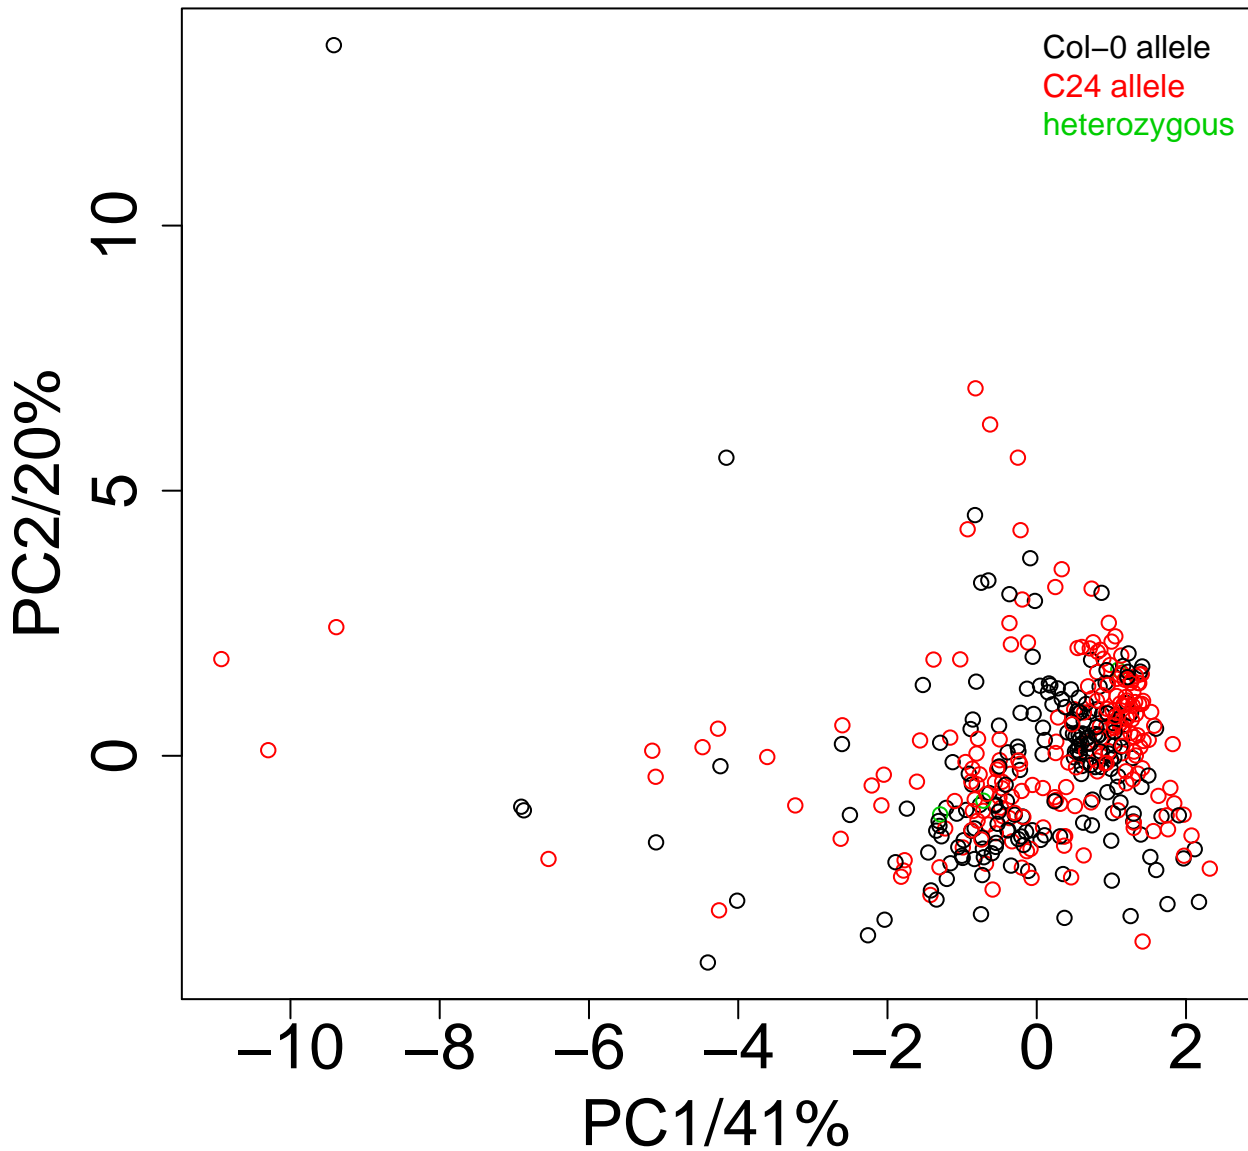

Chr. 5 Pos. 15.4 / MASC03612

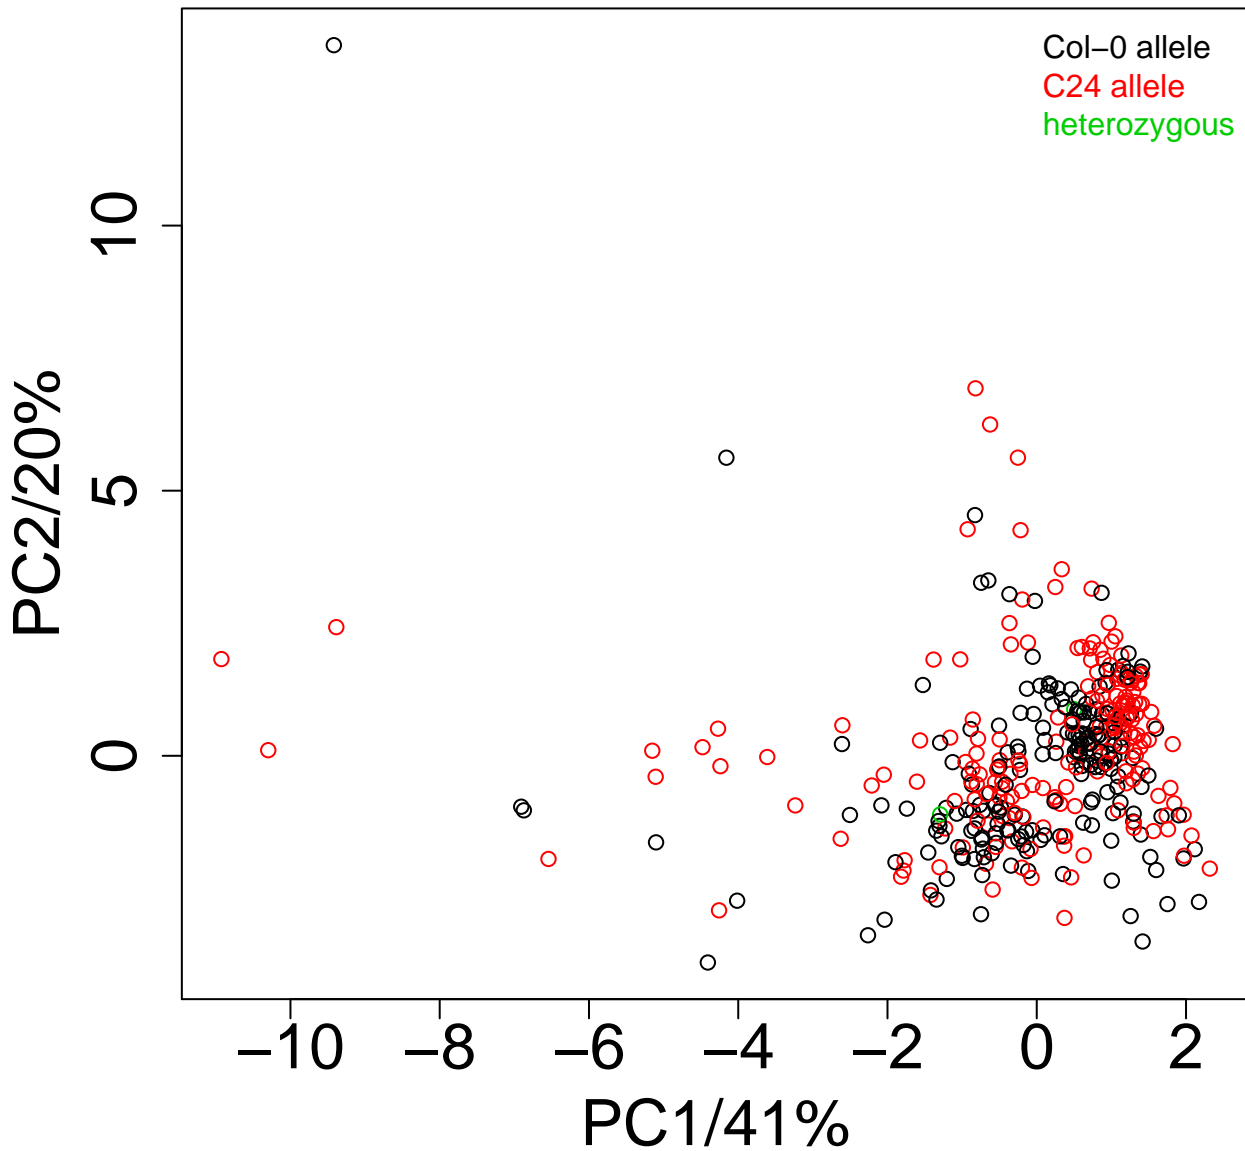

Chr. 5 Pos. 16 / nga106

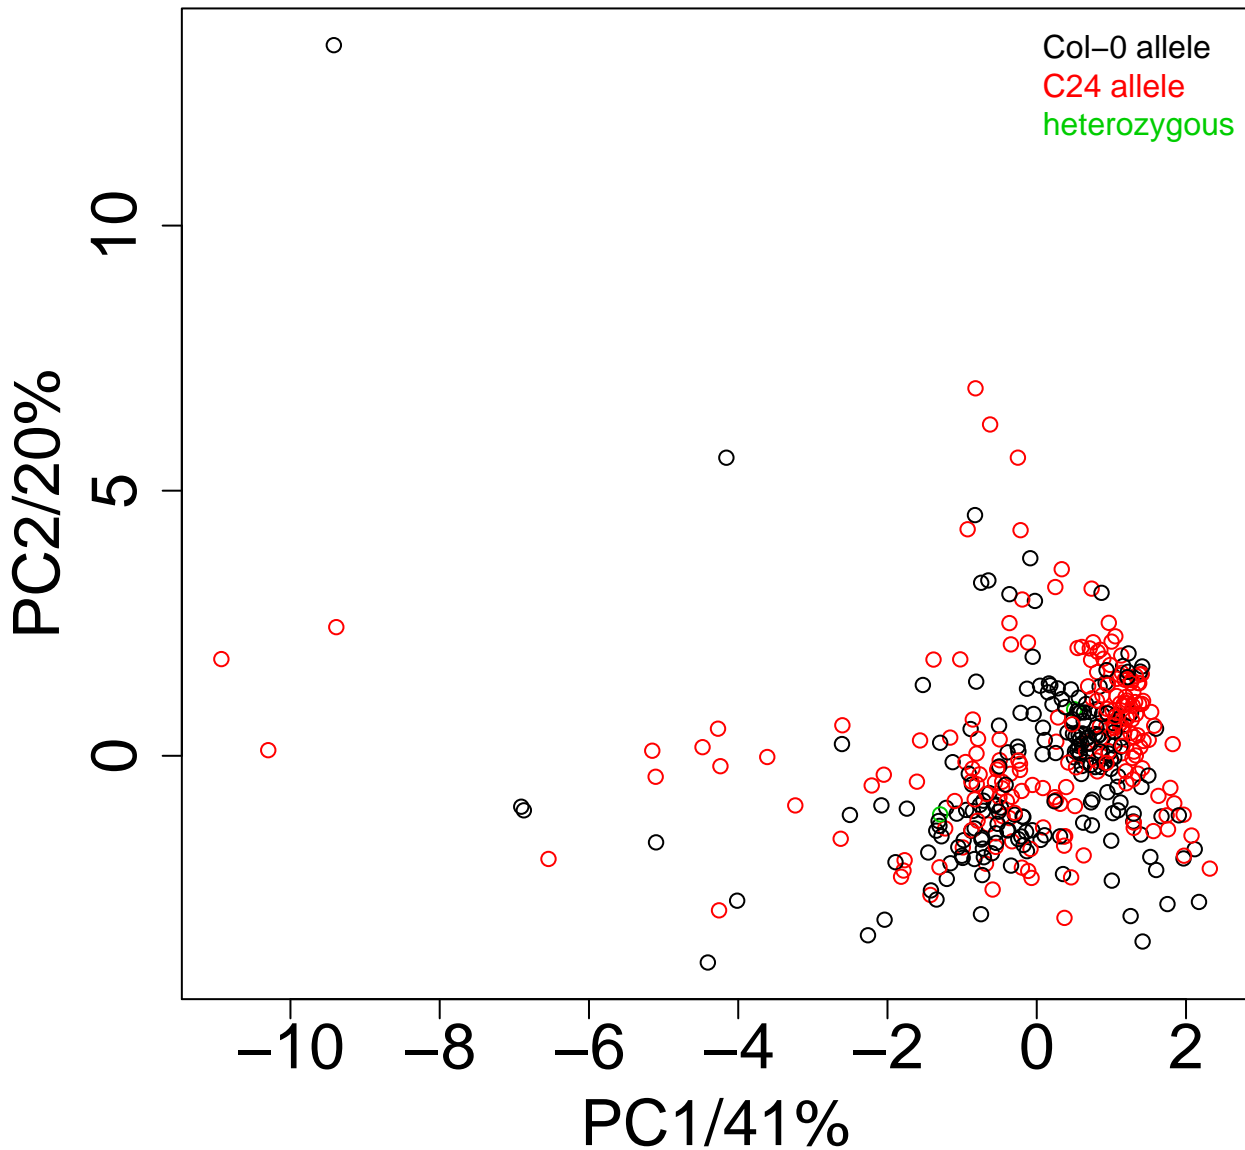



Chr. 5 Pos. 19.2 / MASC09208

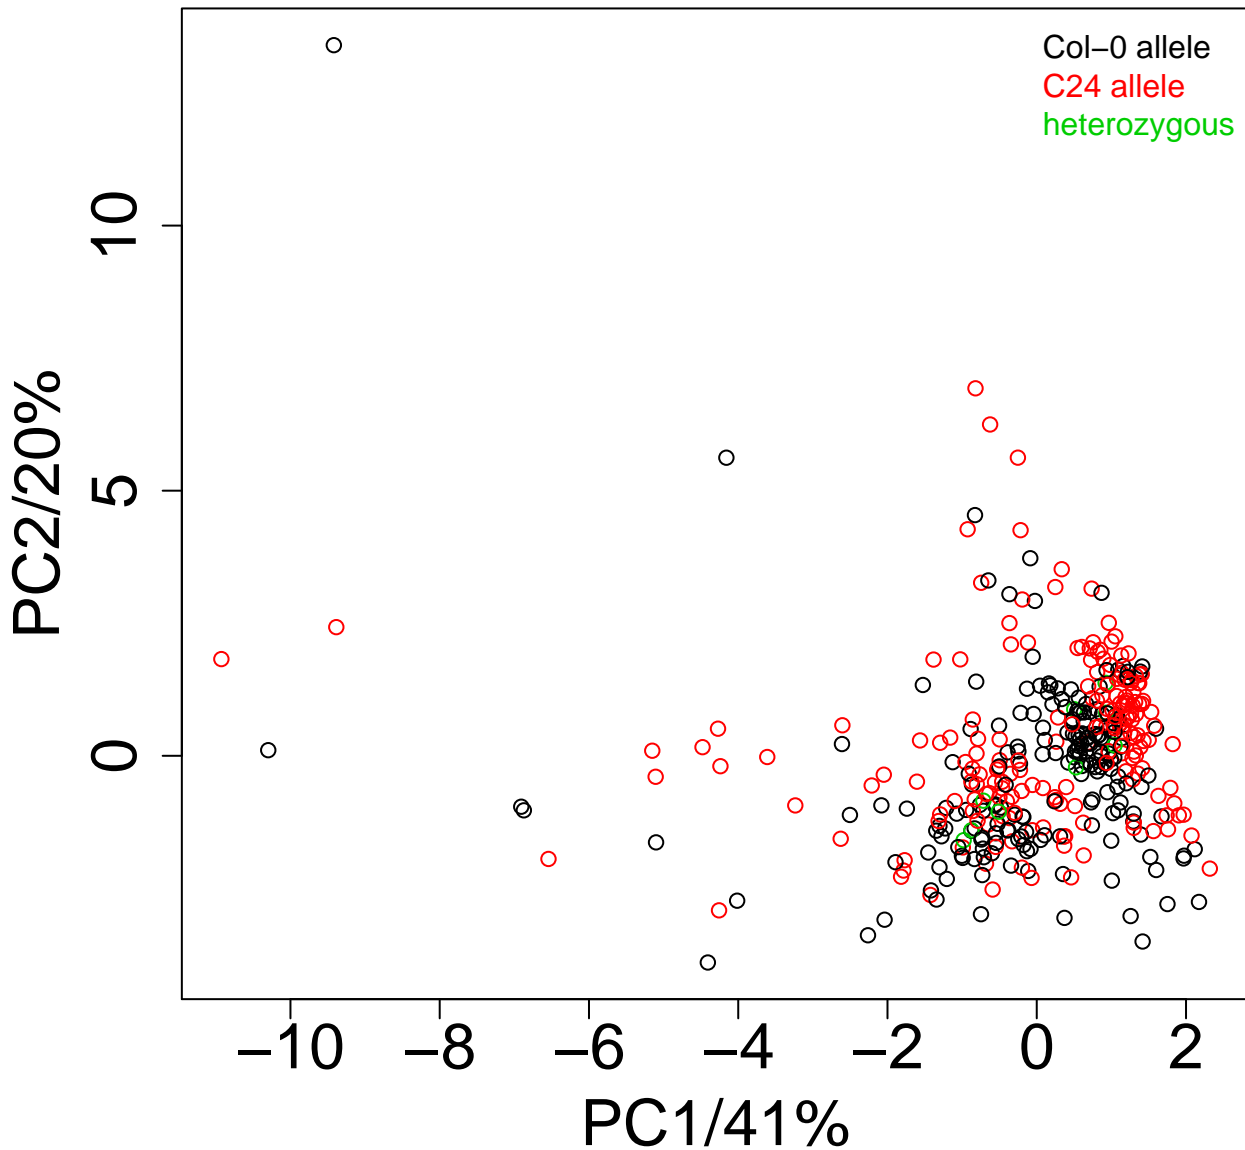

Chr. 5 Pos. 23.9 / MASC09209

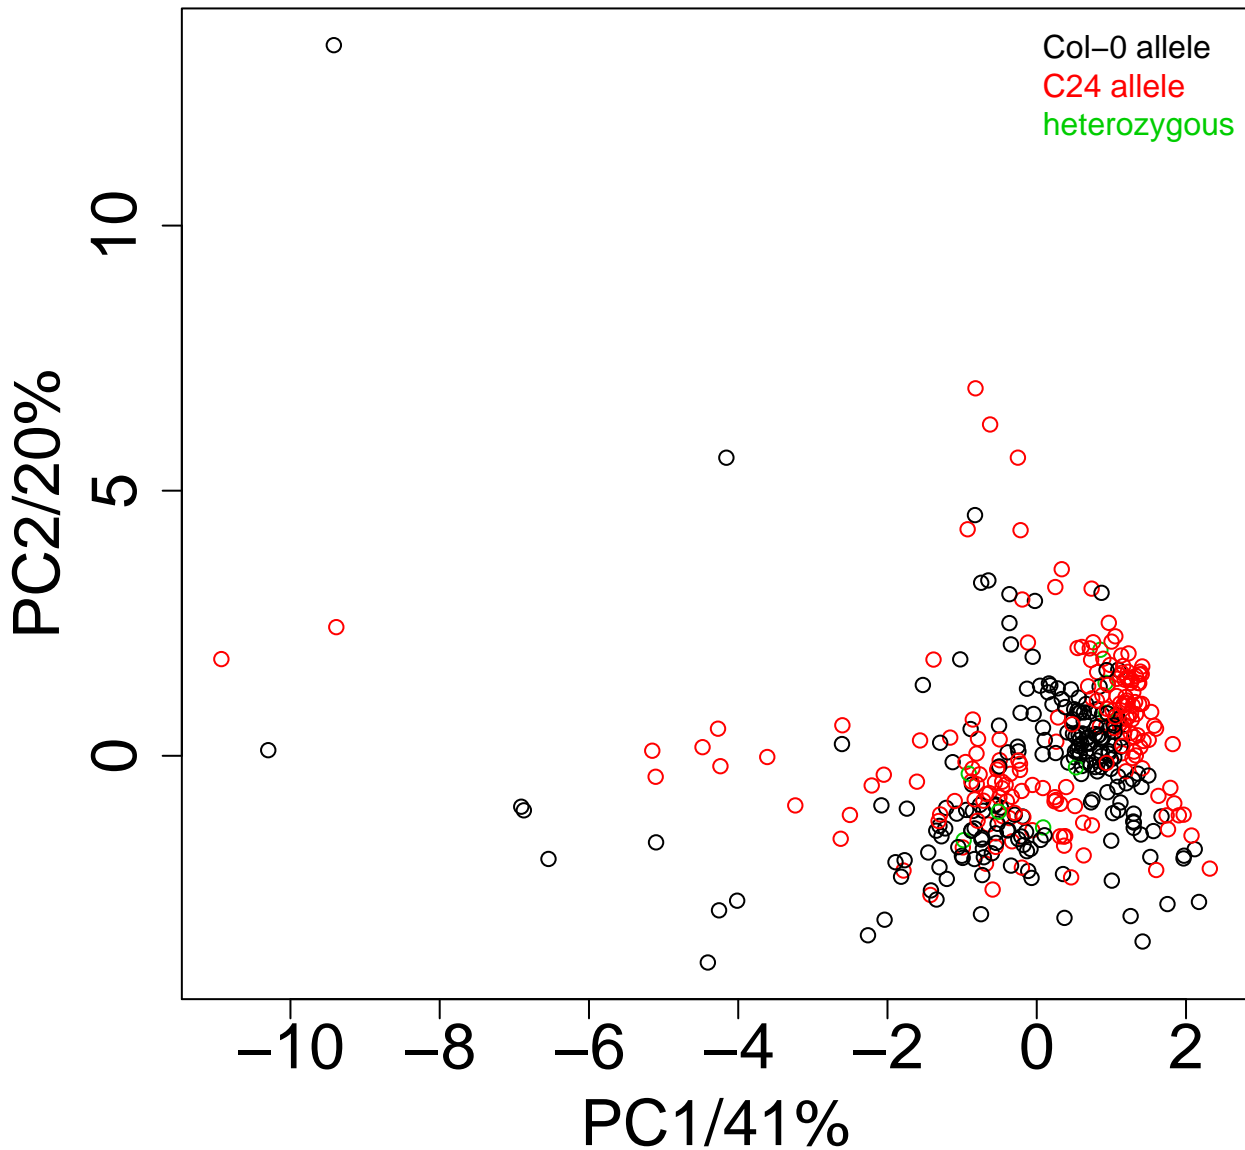

Chr. 5 Pos. 27.6 / nga139

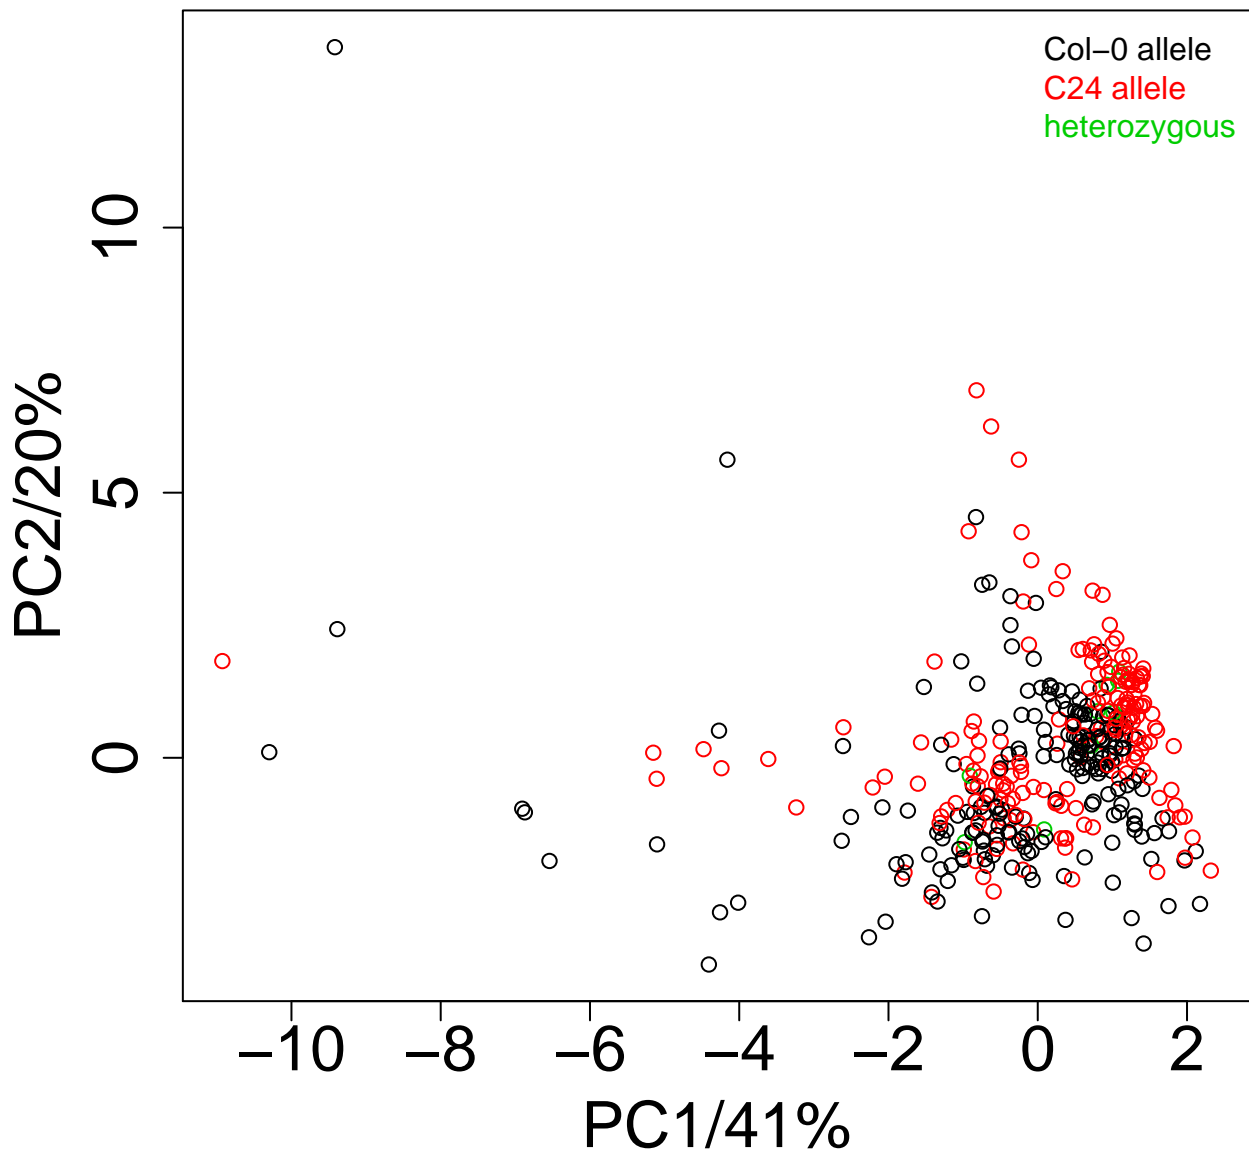

Chr. 5 Pos. 29.6 / MASC03559

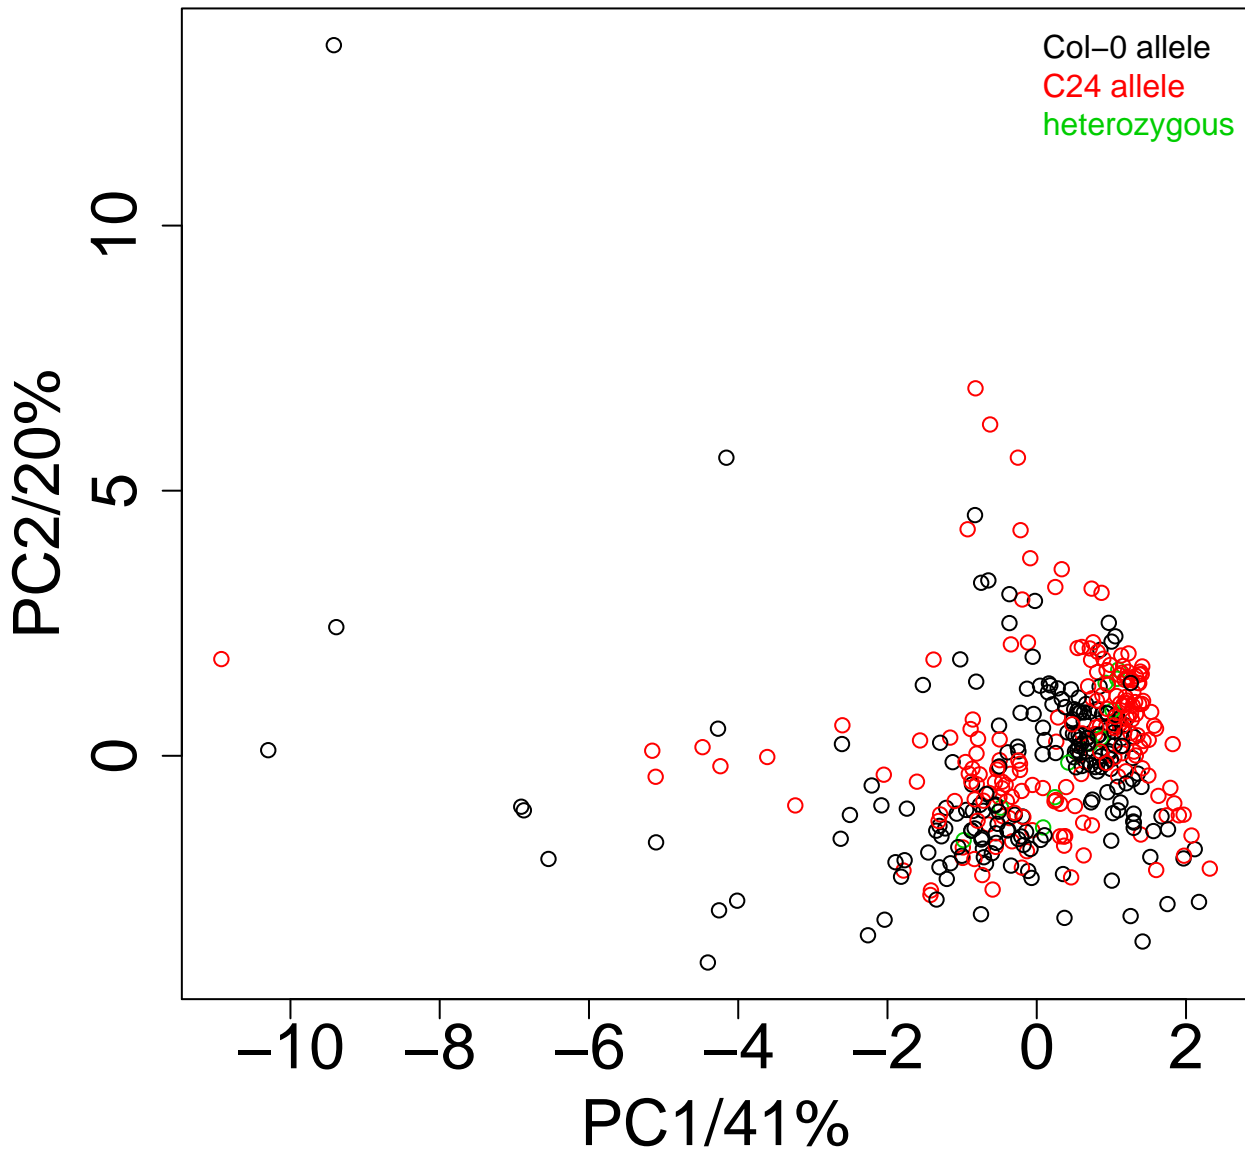

Chr. 5 Pos. 36.8 / MASC04983

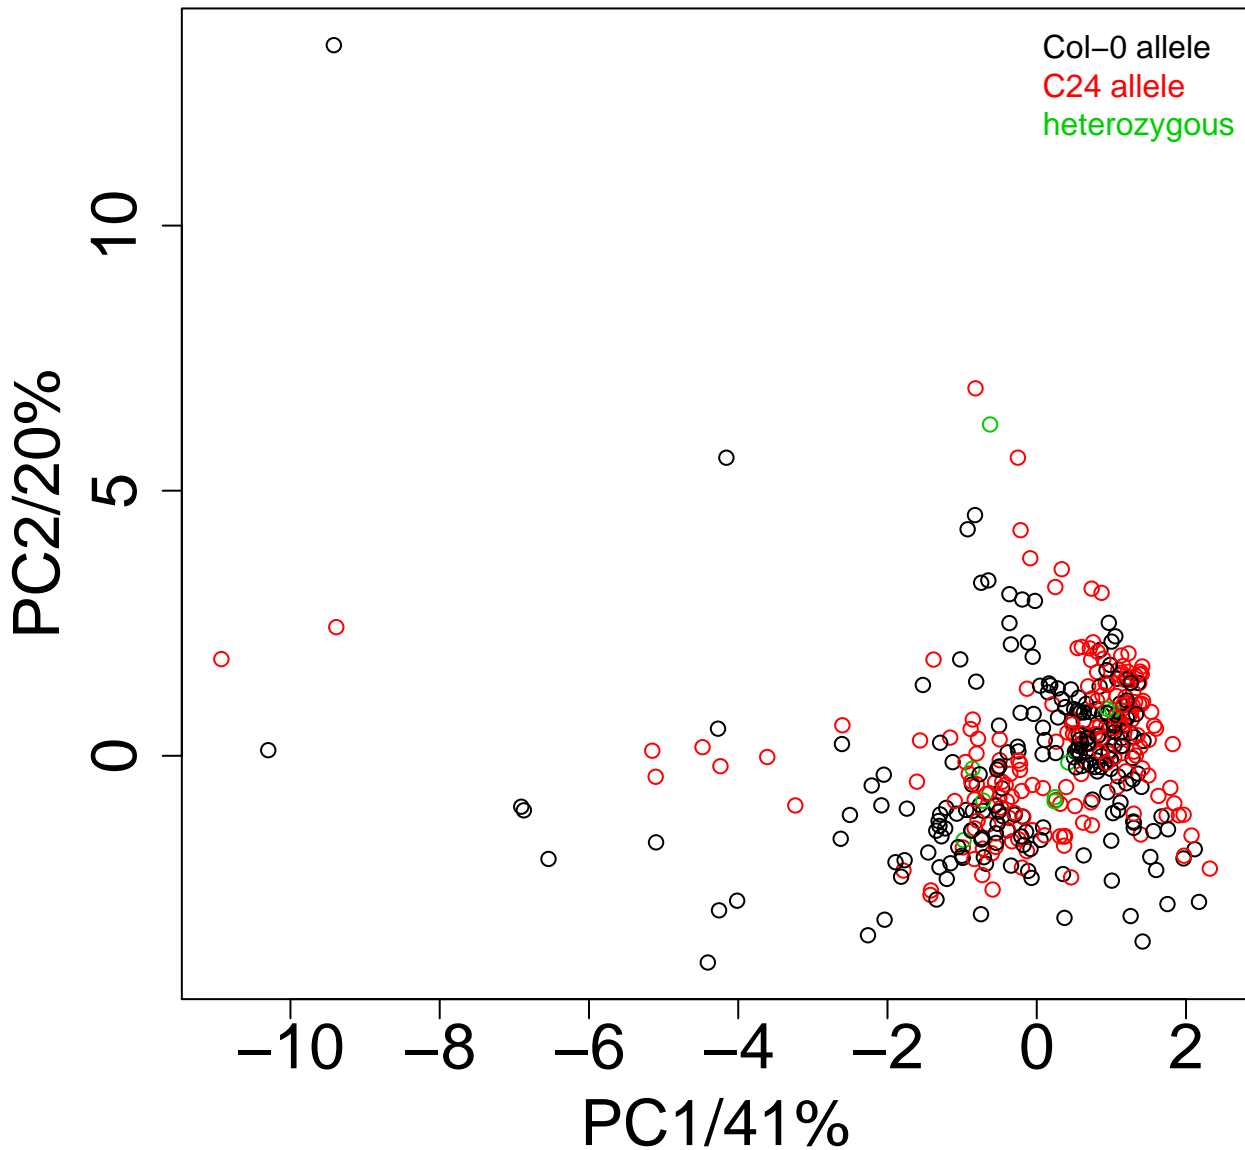

Chr. 5 Pos. 40 / MASC03952

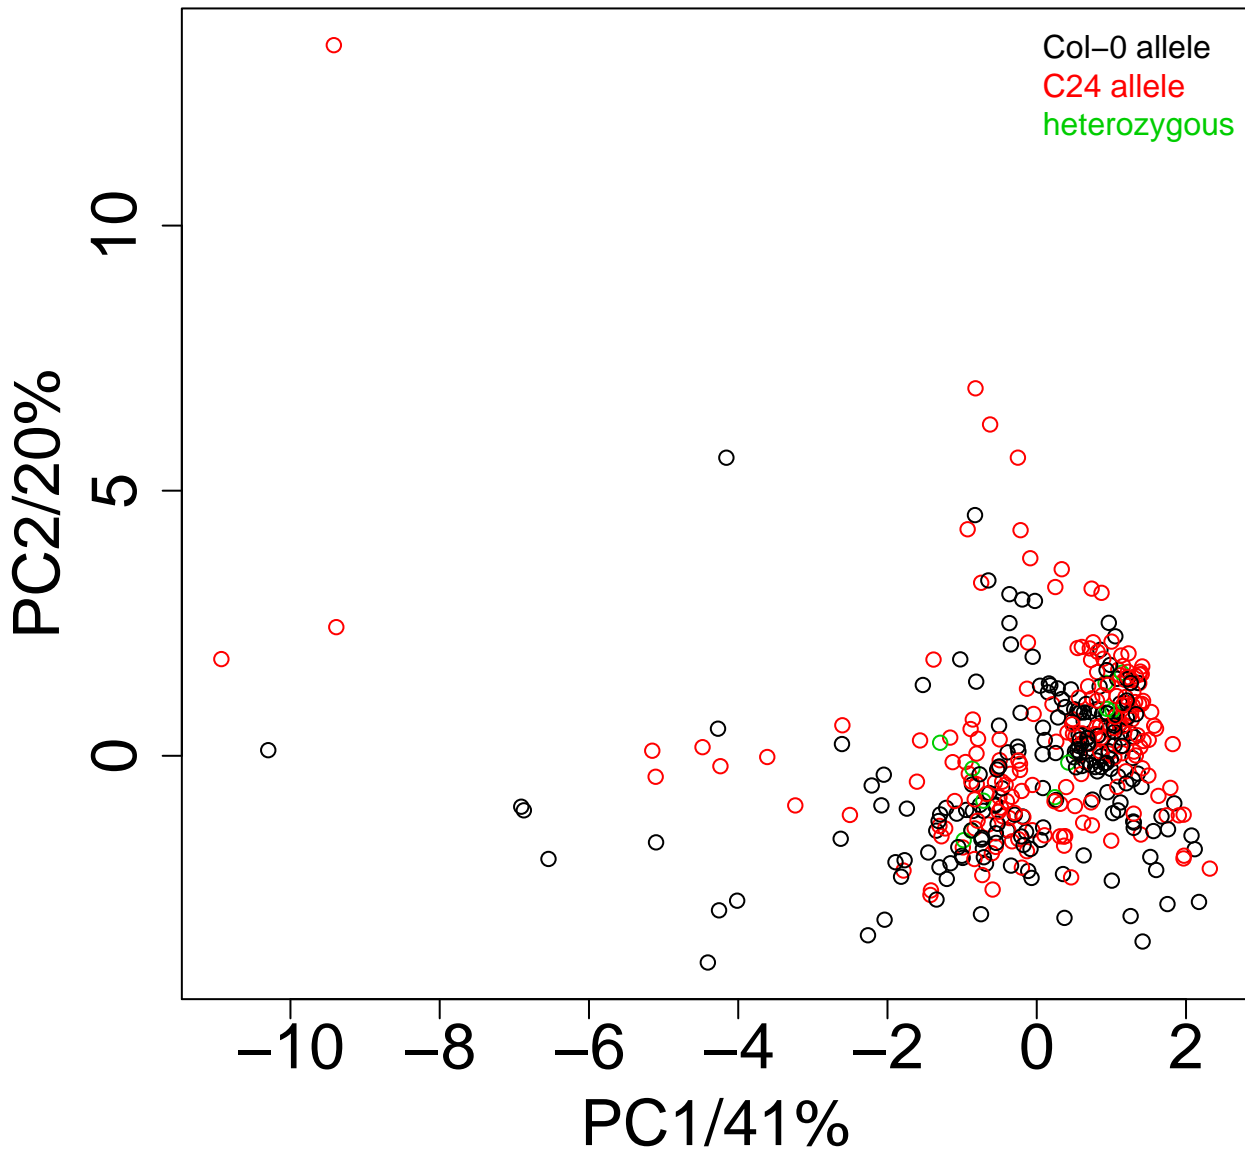

Chr. 5 Pos. 40 / MASC01174

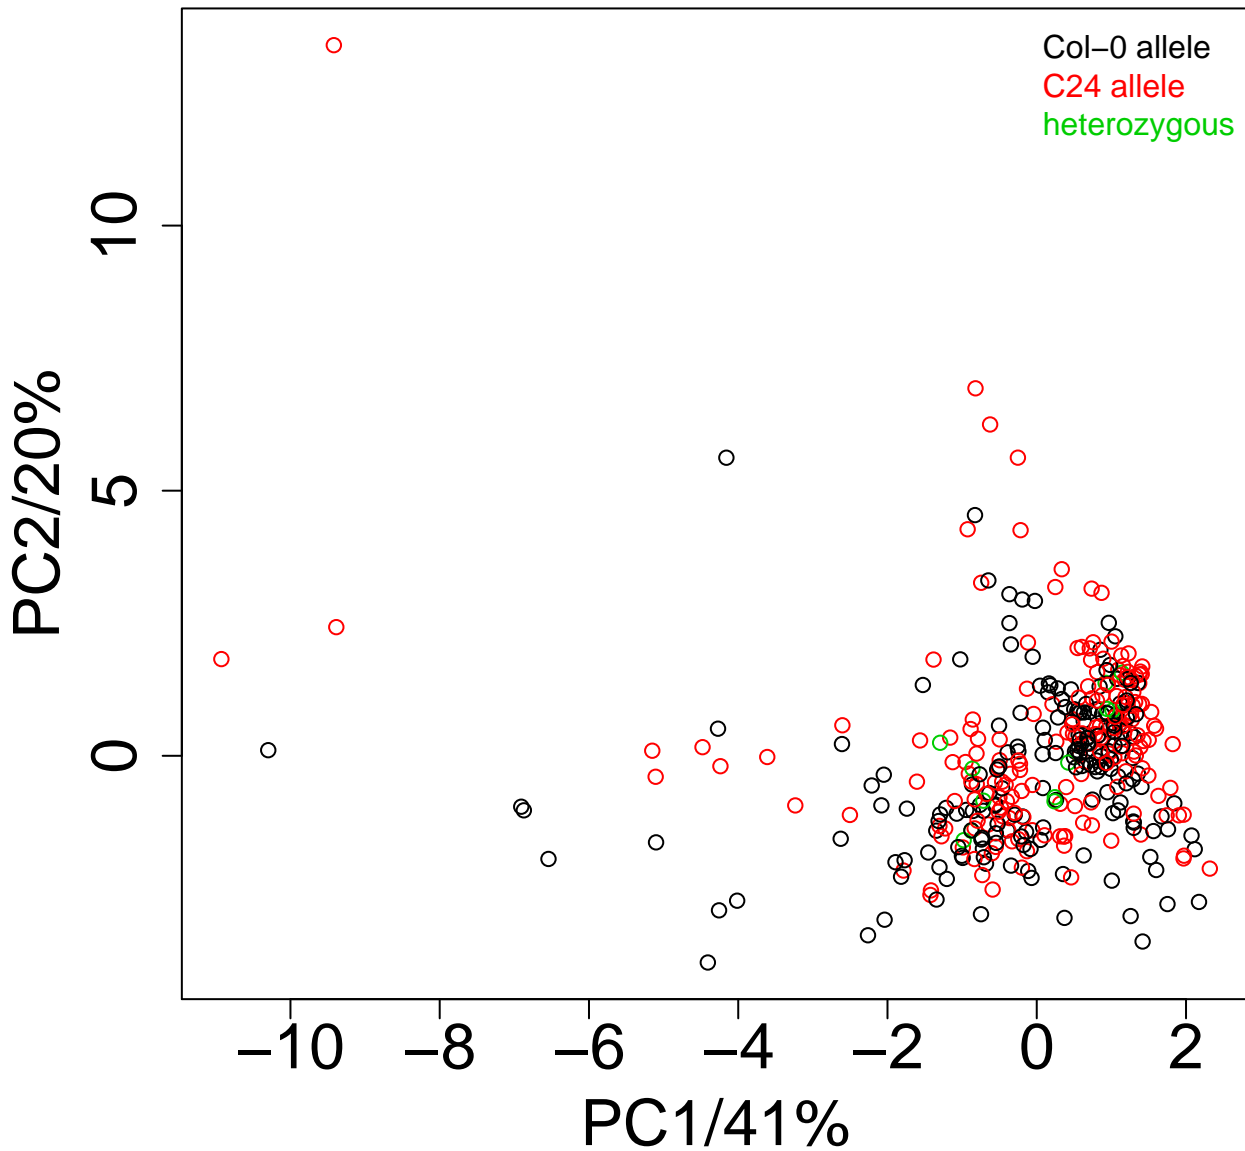

Chr. 5 Pos. 41.5 / MASC01361

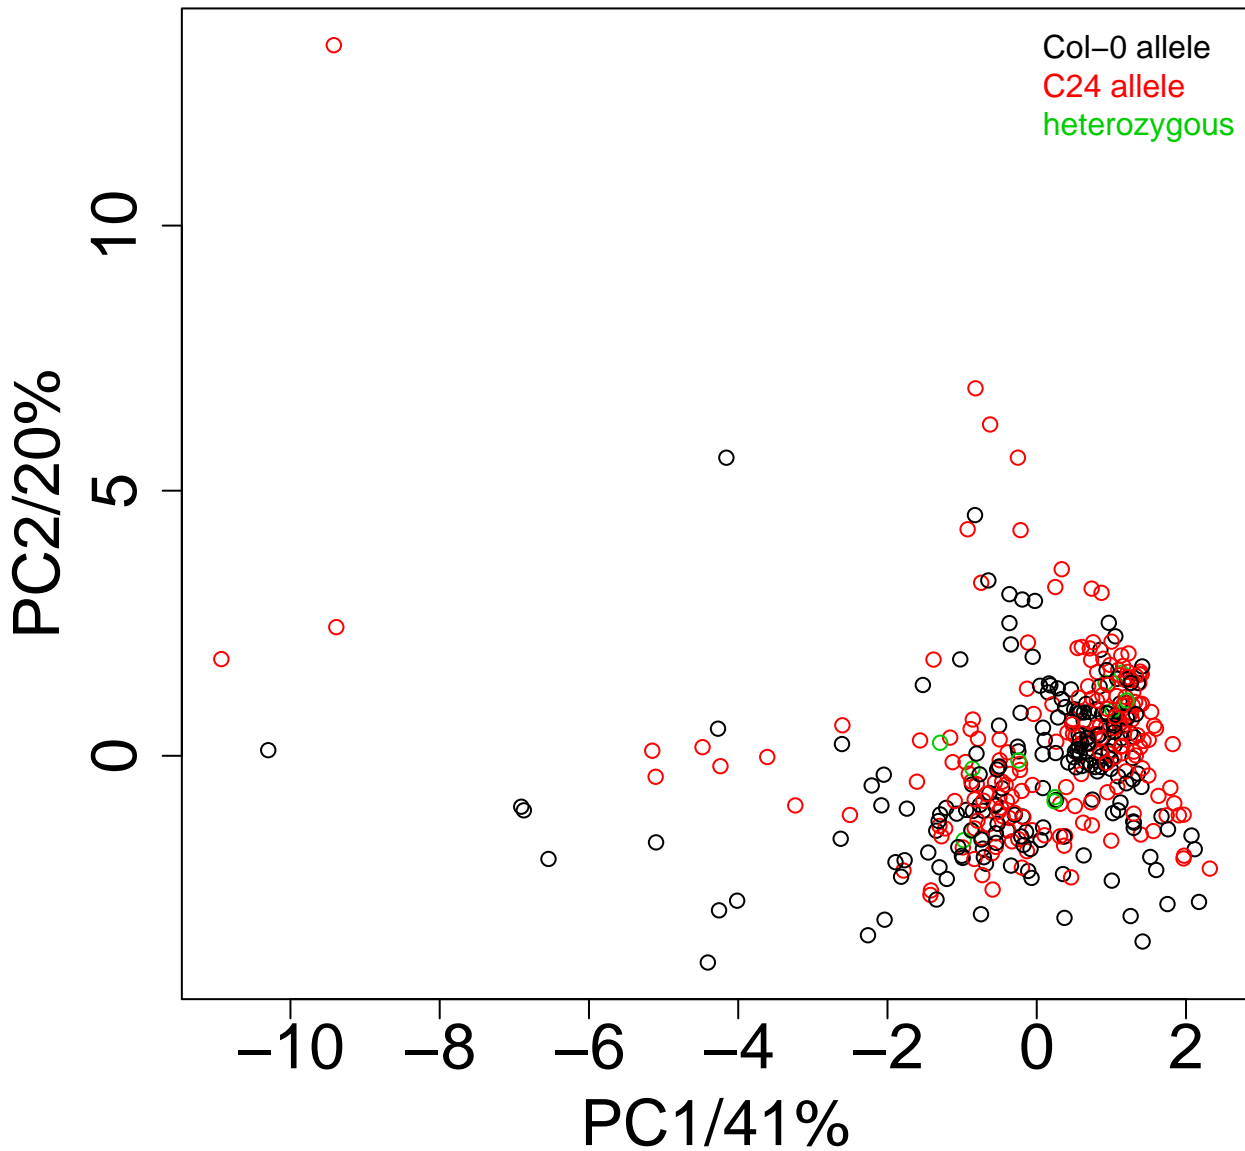



Chr. 5 Pos. 47 / MASC04275

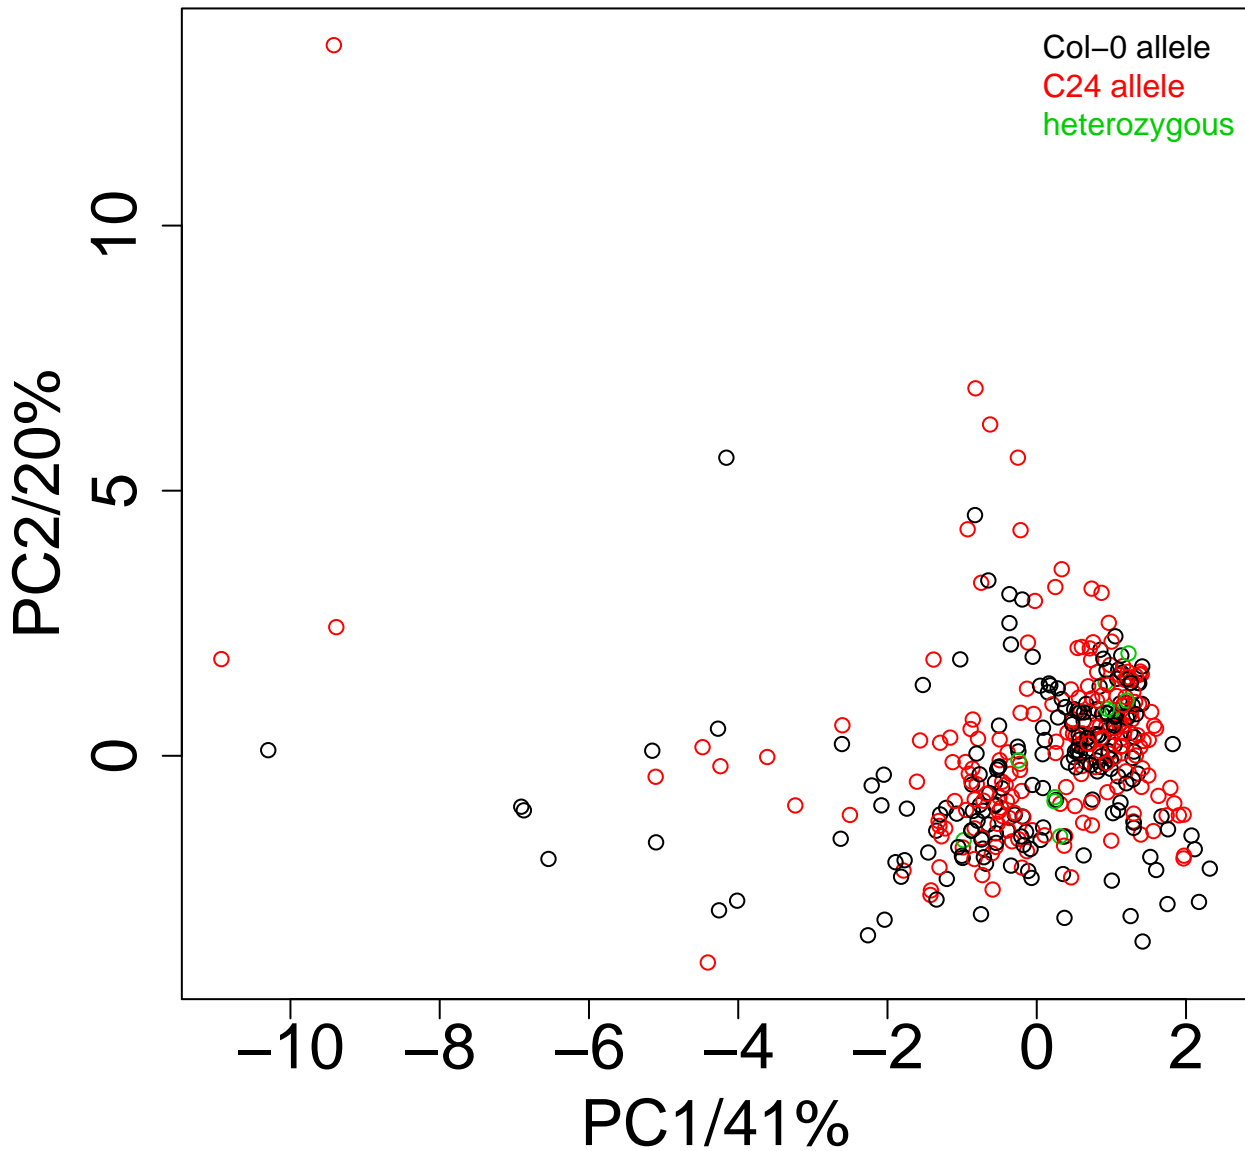

Chr. 5 Pos. 52.2 / MASC01582

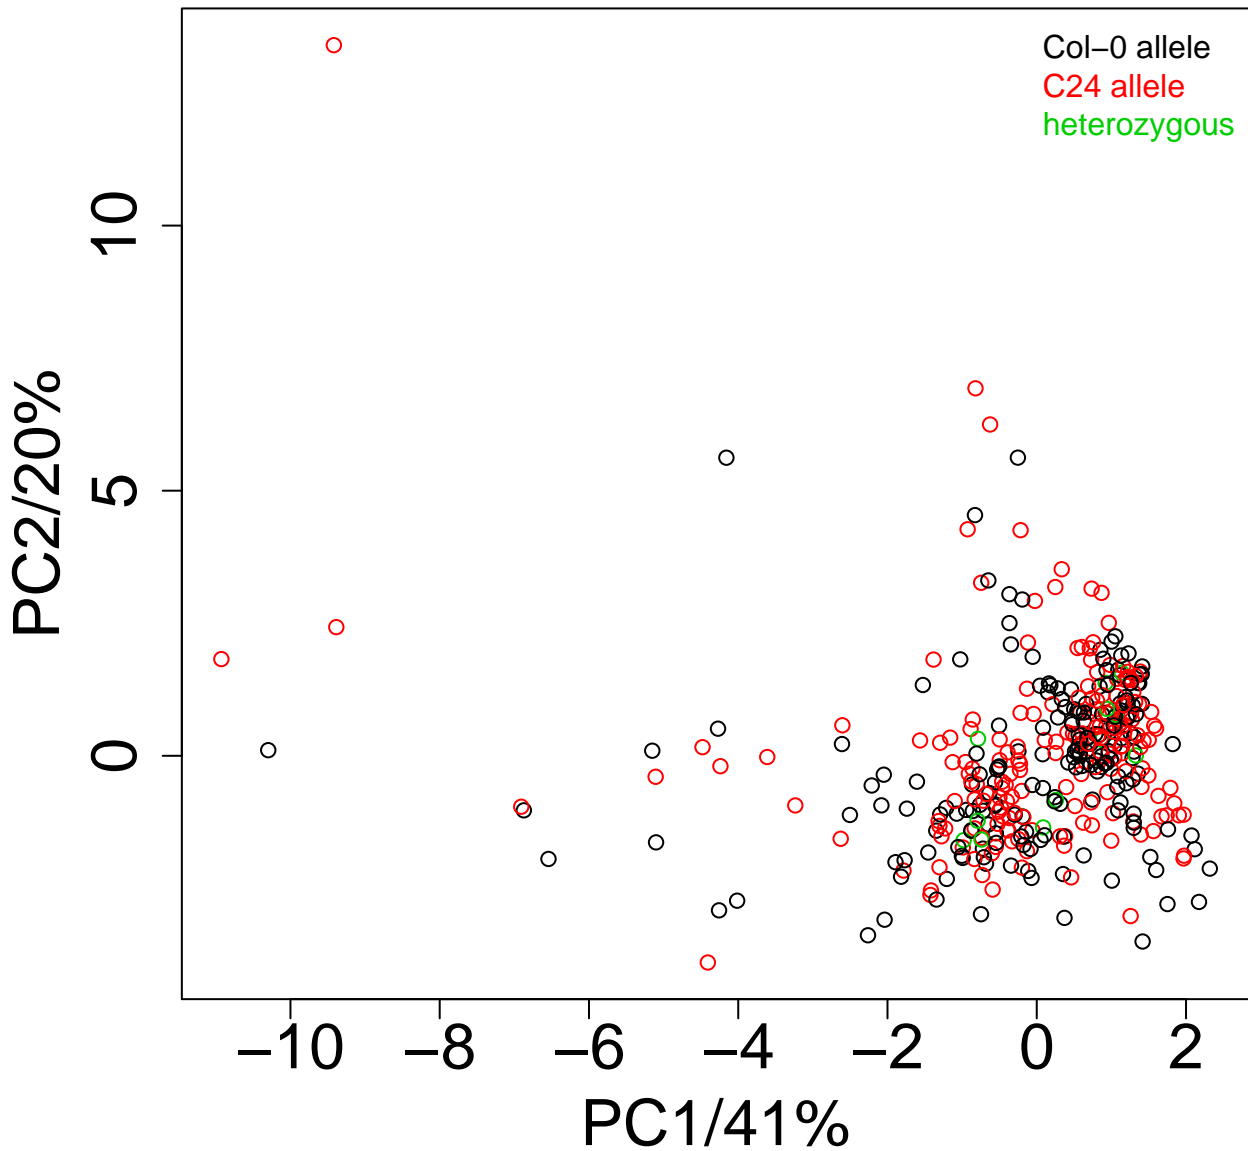

Chr. 5 Pos. 57.5 / MASC03128

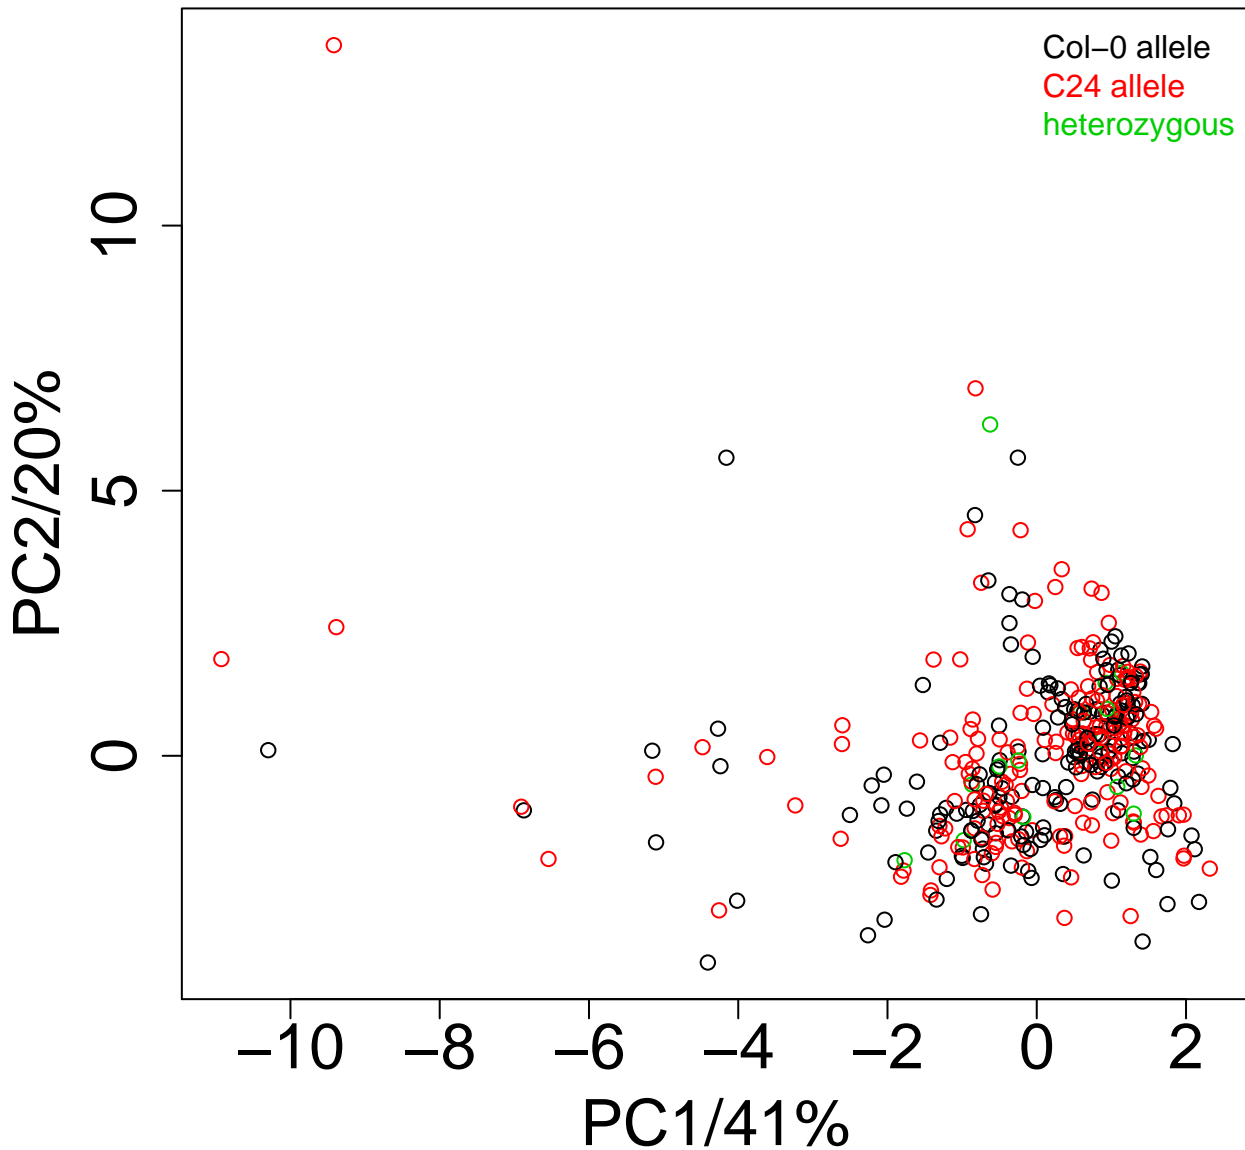

Chr. 5 Pos. 60.3 / MASC04317

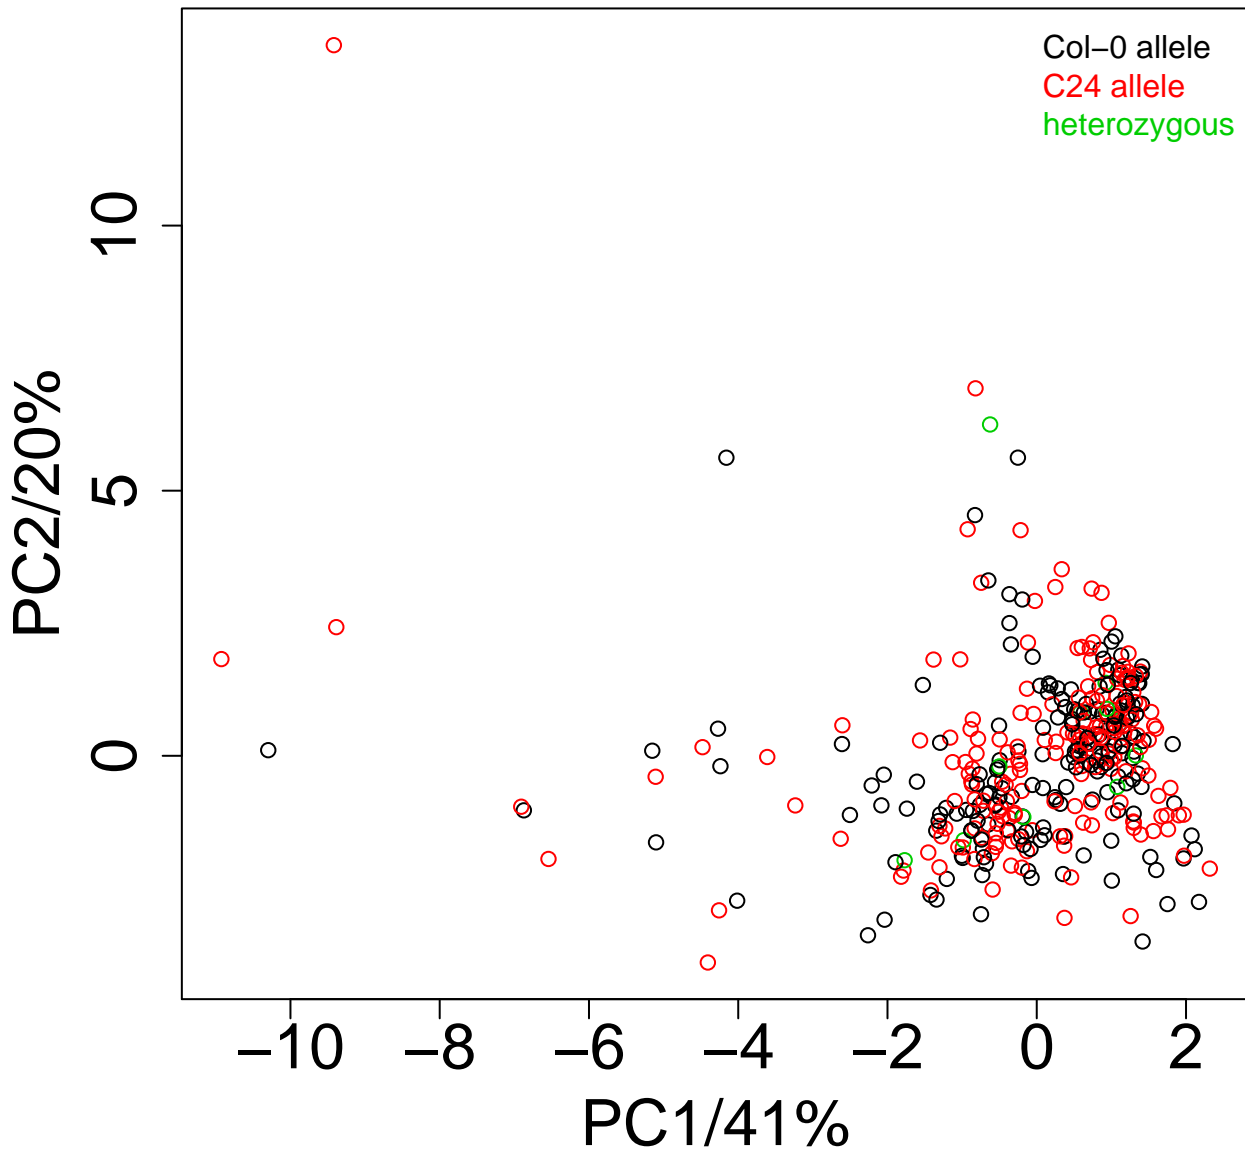

Chr. 5 Pos. 63.3 / MASC04298

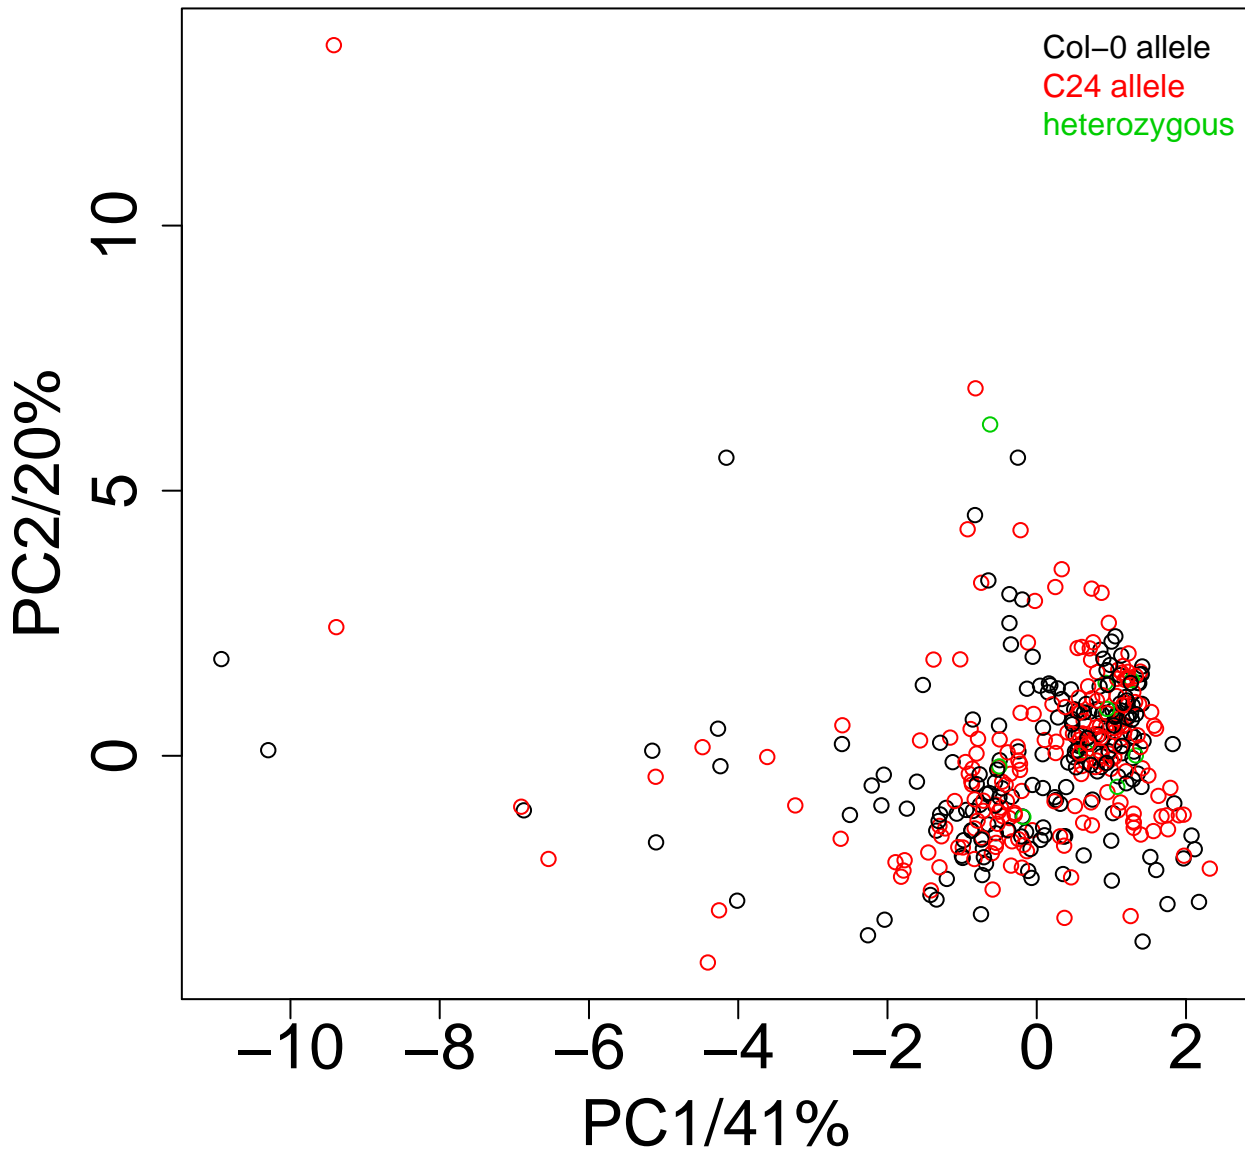

Chr. 5 Pos. 65 / nga129

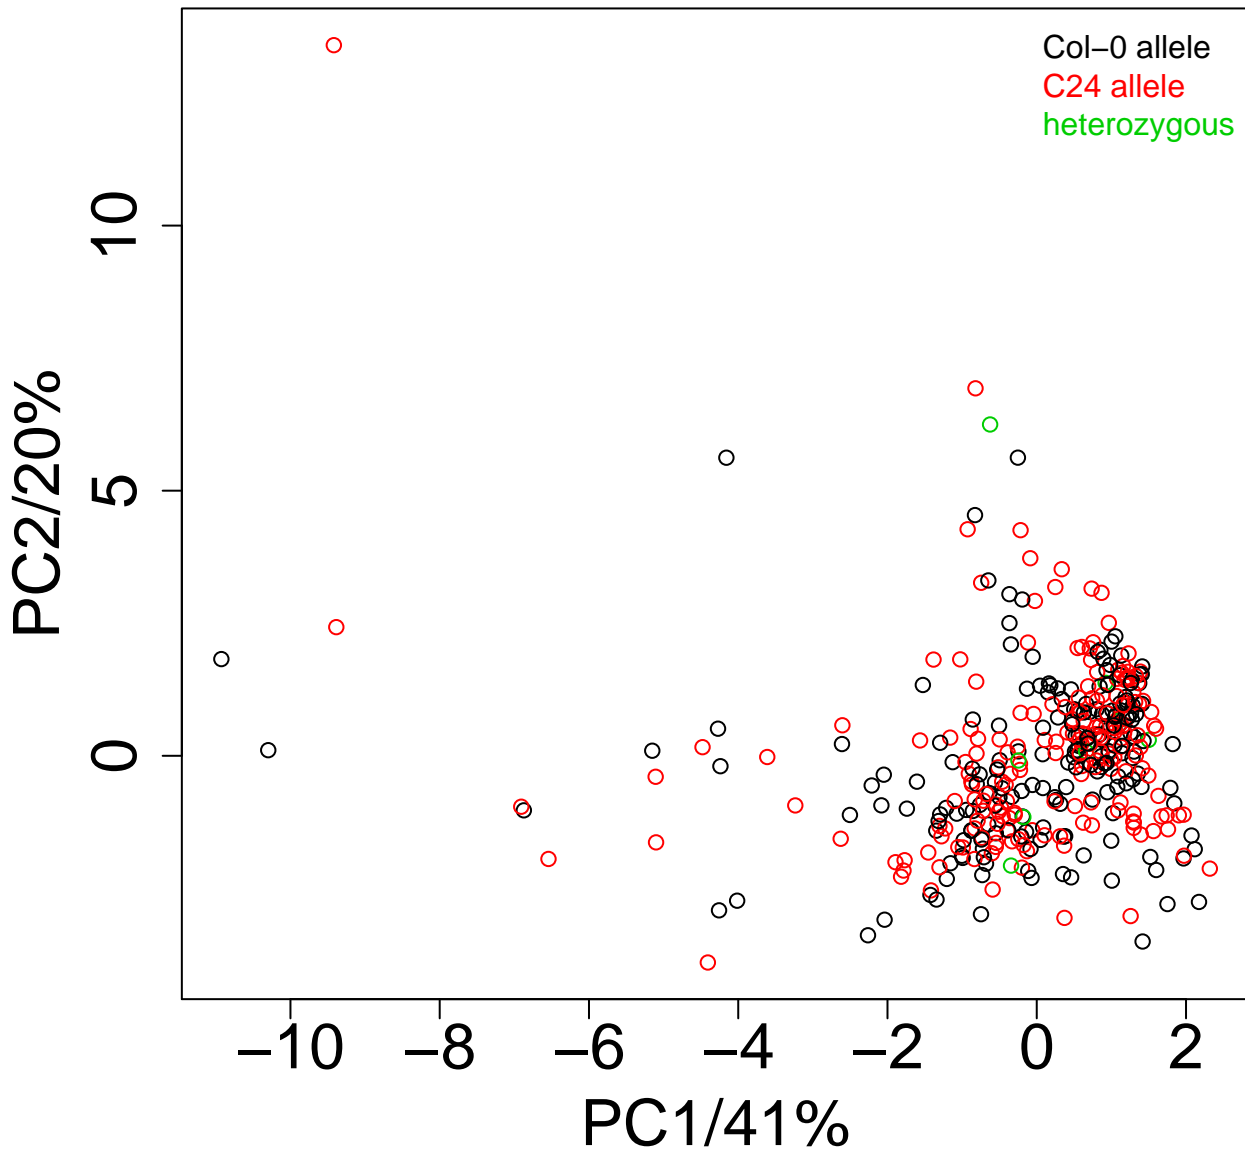

Chr. 5 Pos. 65.1 / MASC02675

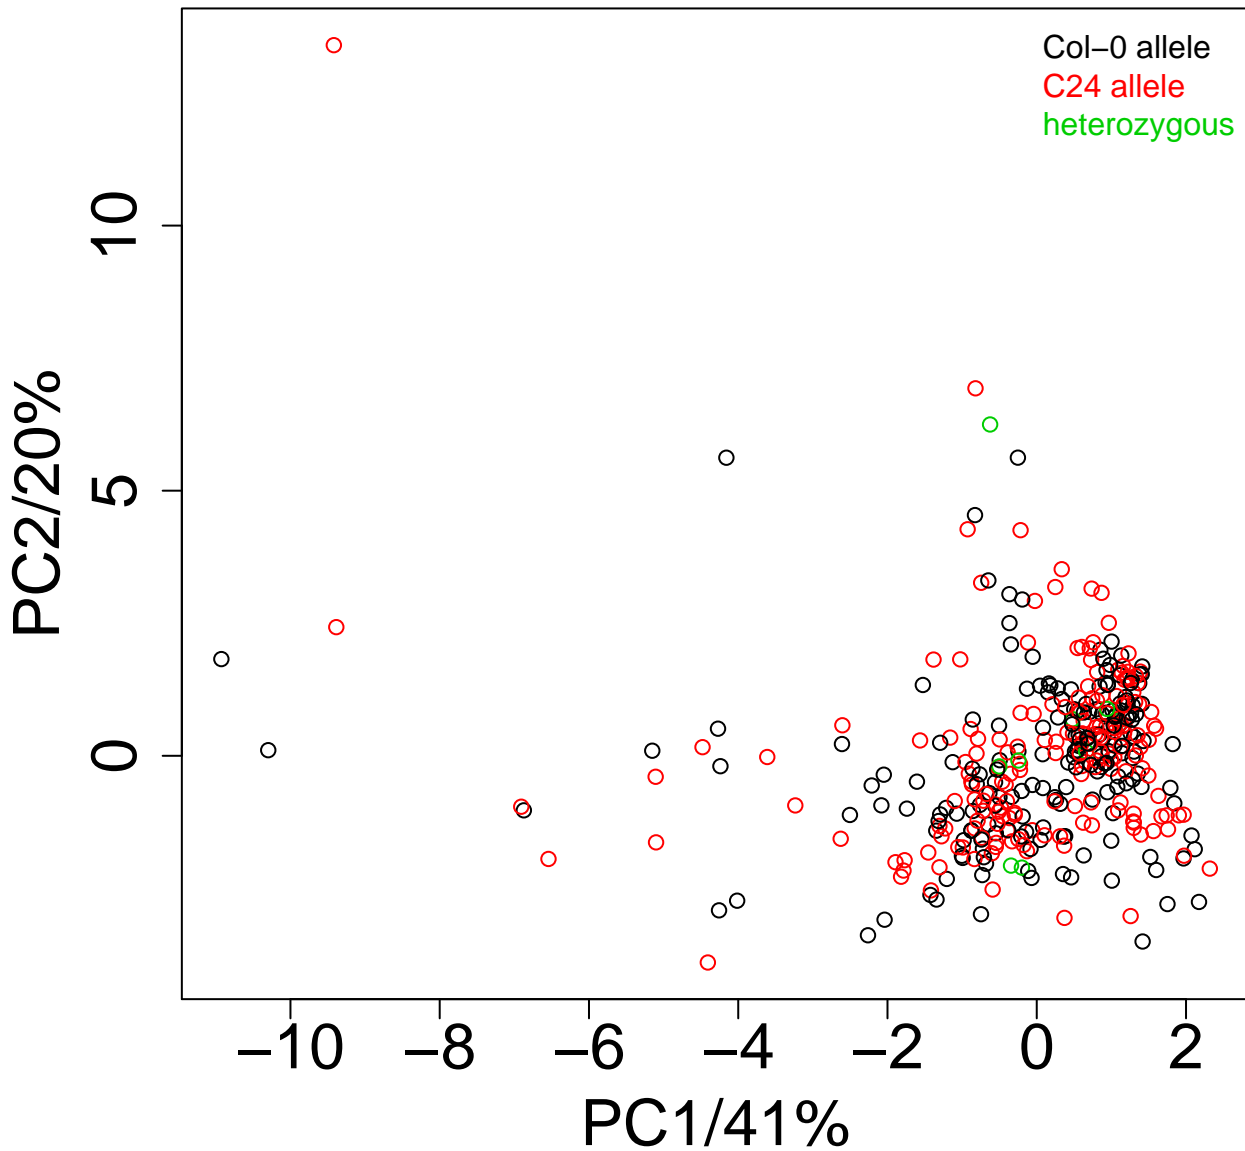

Chr. 5 Pos. 69.3 / MASC04591

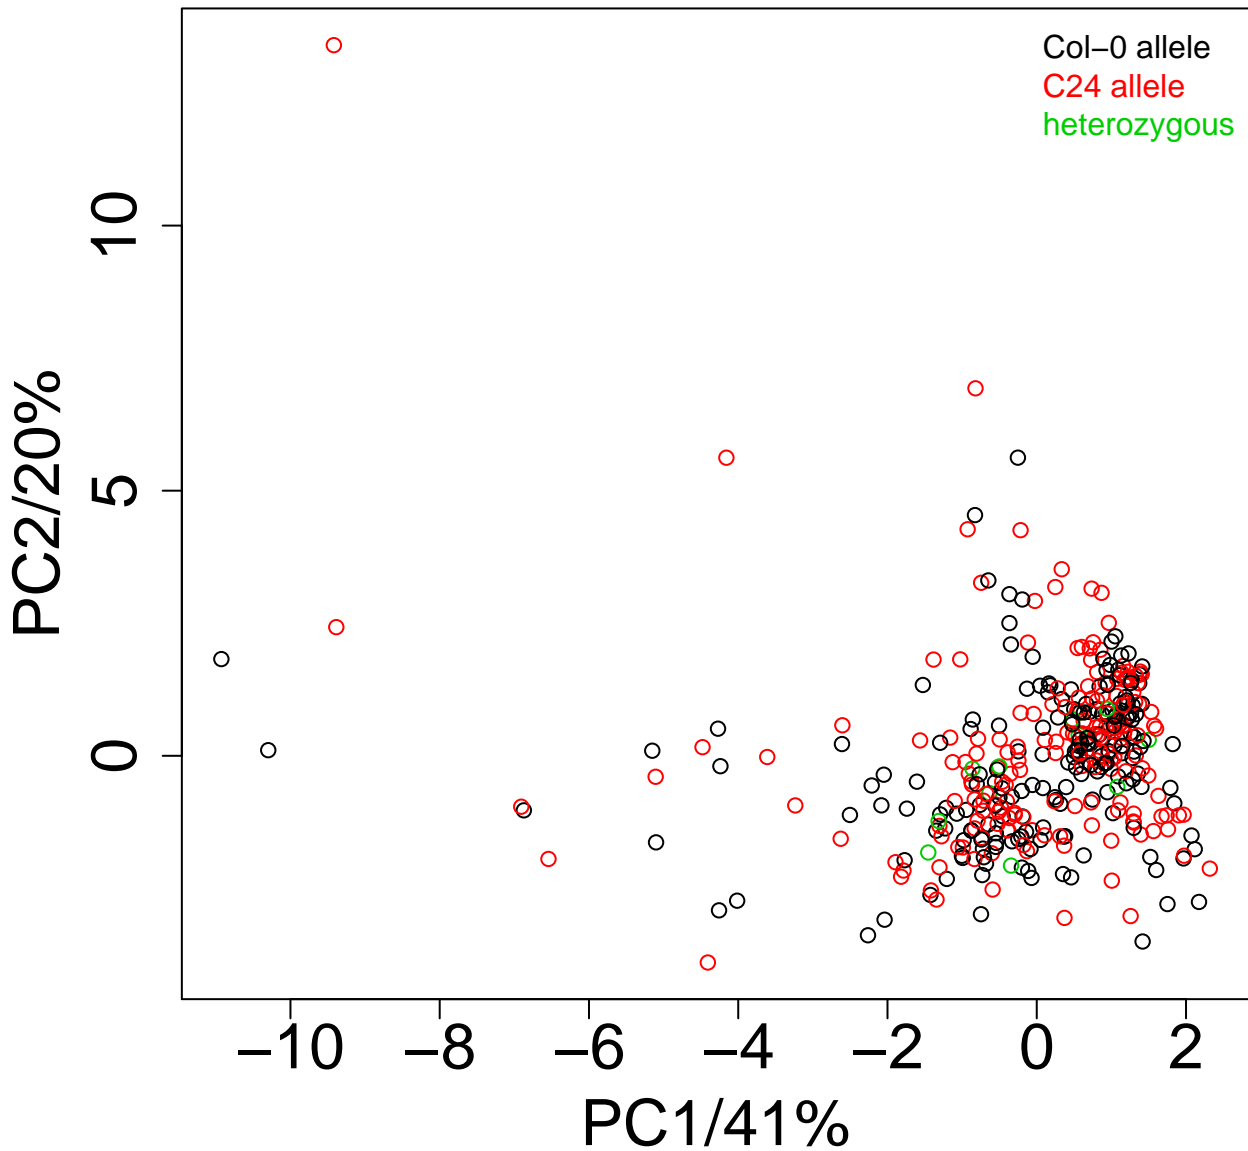



Chr. 5 Pos. 73.1 / MASC04394

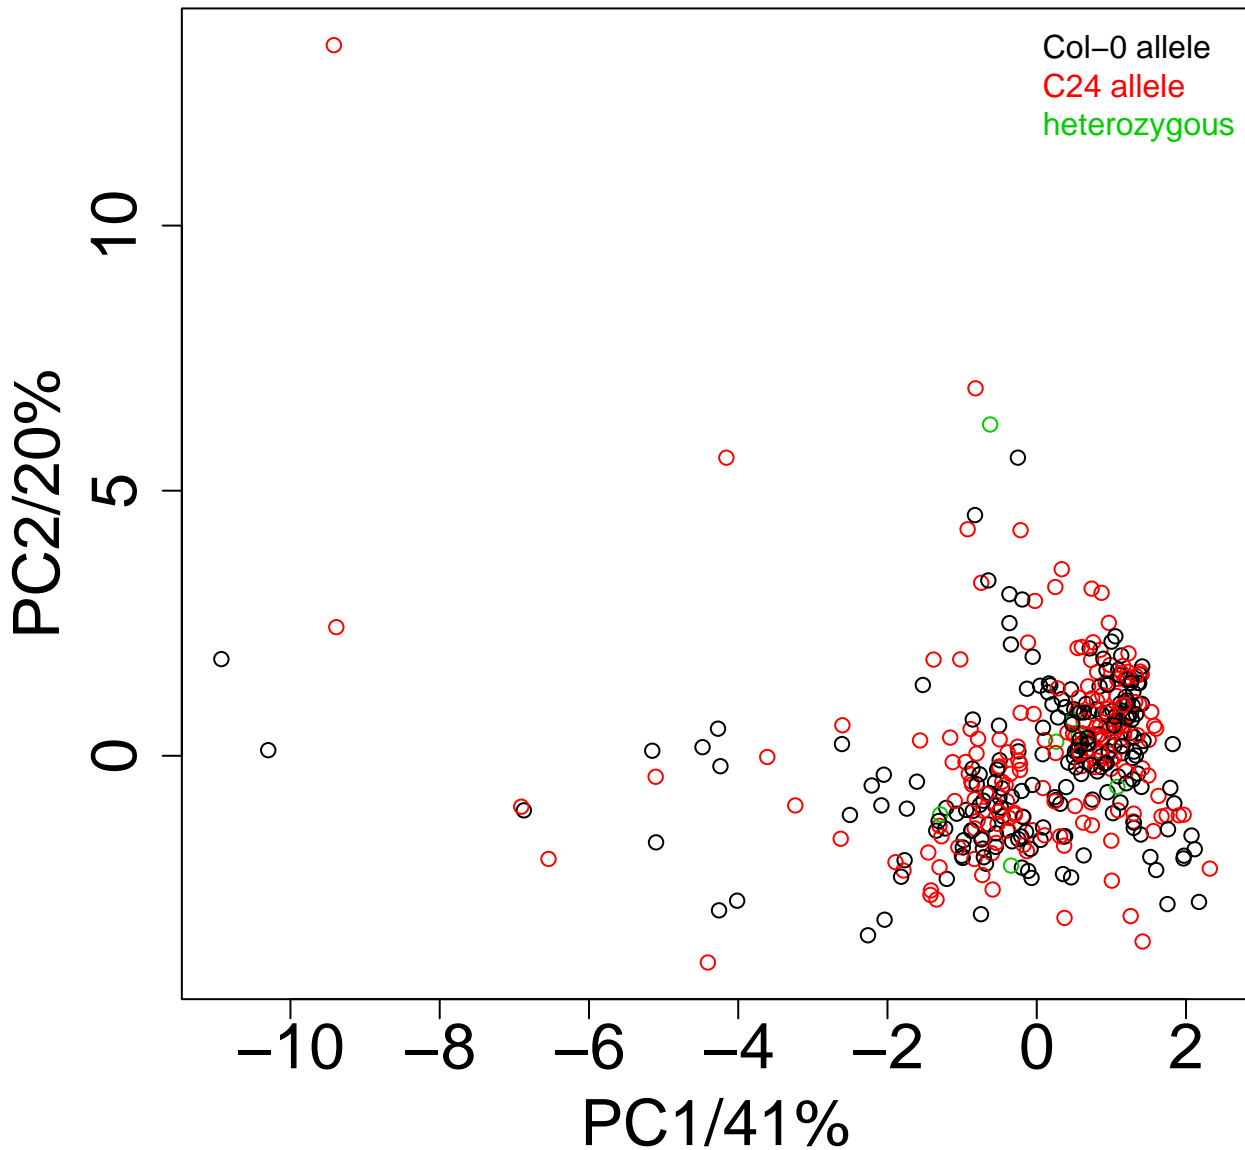

Chr. 5 Pos. 76.1 / MASC01545

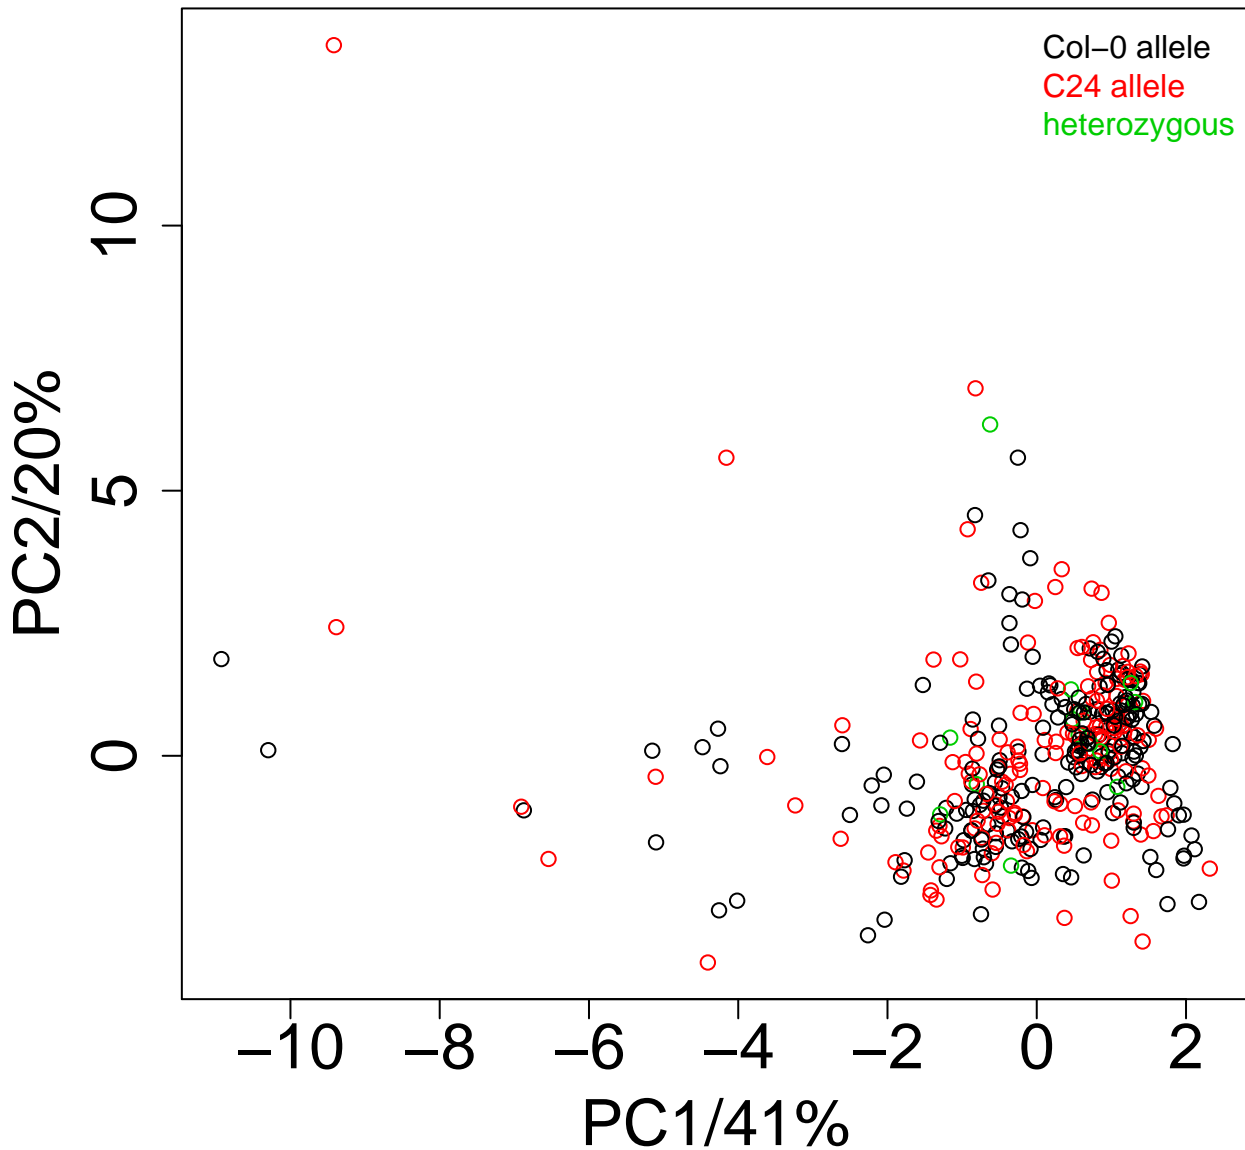

Chr. 5 Pos. 78.5 / MASC04576

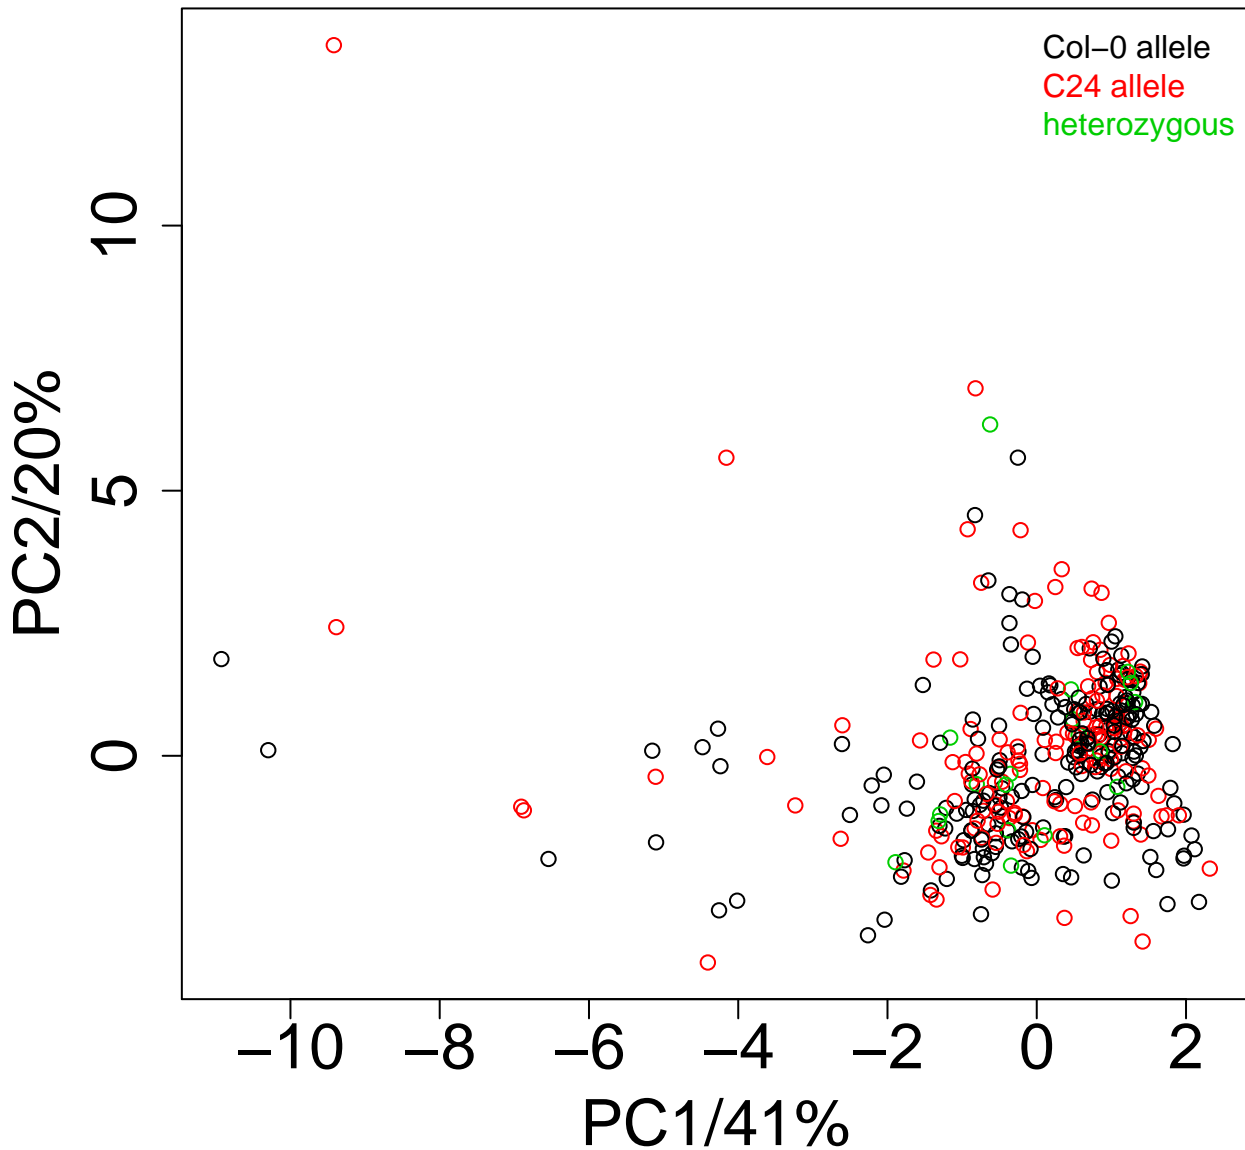

Chr. 5 Pos. 82.9 / MASC09211

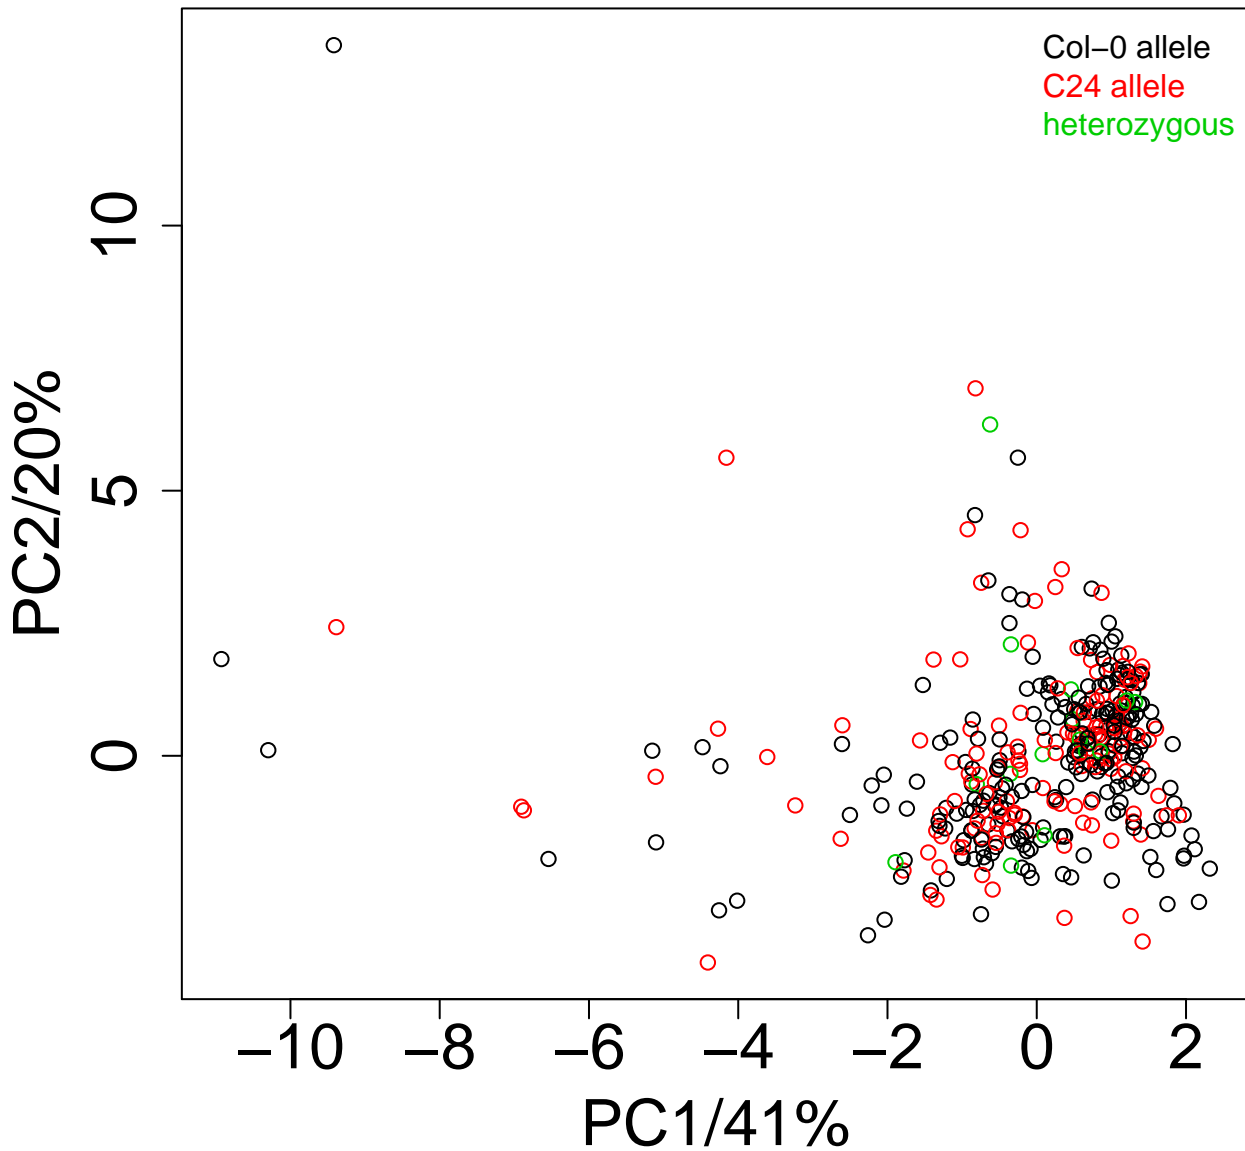

Chr. 5 Pos. 89.2 / K8K14IDa

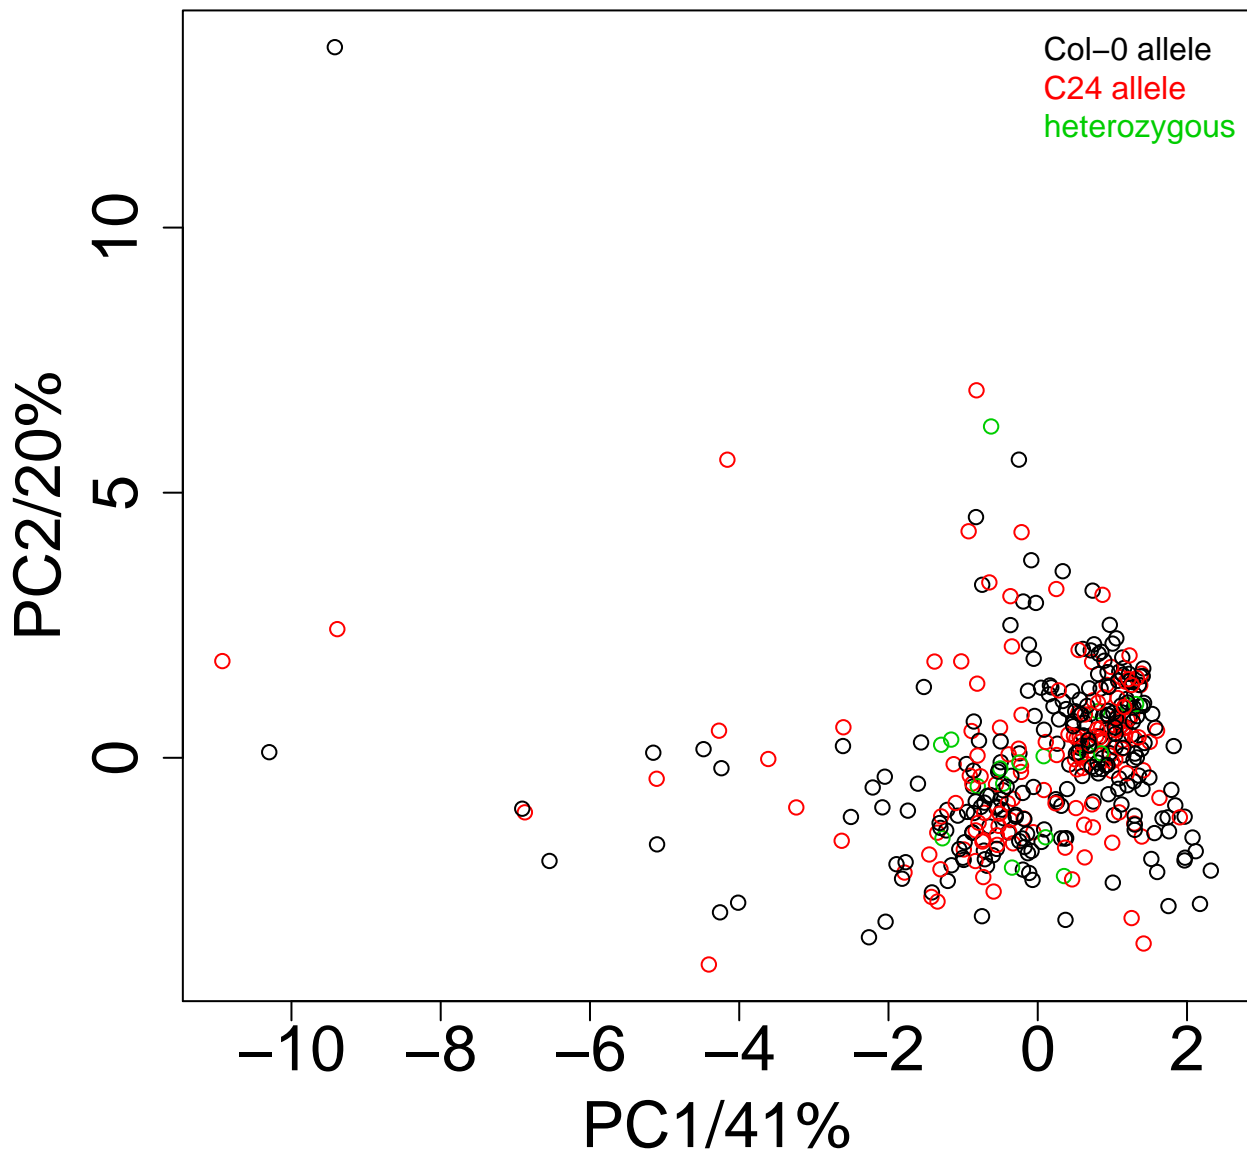

Chr. 5 Pos. 89.7 / K8K14IDb

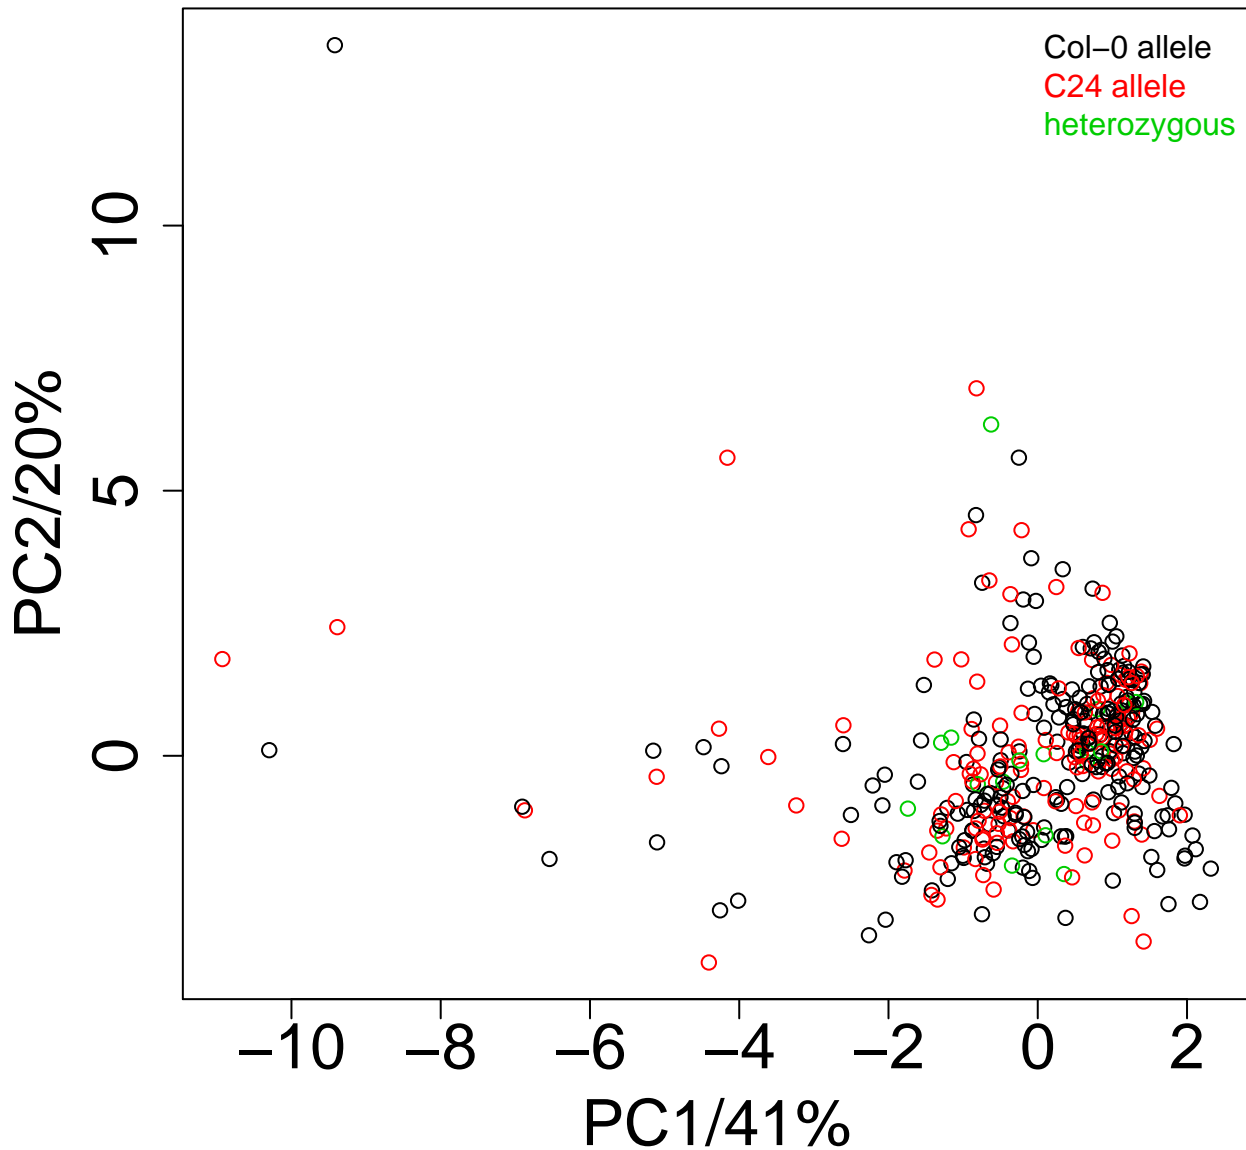

Supplement: erx049_suppl_Supplementary_Dataset_S12.pdf [file erx049_suppl_Supplementary_Dataset_S12.pdf]
