# Supplementary material for: Genetic dissection of metabolite variation in Arabidopsis seeds: evidence for mQTL hotspots and a master regulatory locus of seed metabolism
Source: PubMed Central journal article supplement (PMC5444479; doi:10.1093/jxb/erx049), 2017-03-06
Supplement: erx049_suppl_Supplementary_Dataset_S10.pdf [file erx049_suppl_Supplementary_Dataset_S10.pdf]

> AT1G10070 (BCAT2) | Col-0 (TAIR10) vs. C24 (contig\_chrlL\_95)

ttactttcatatcctataaataatggtgactctcttgatcacccatcaaaagcttttgaatagttttggtaaatt  
tgtgacataaatttggatataatcaccacatcgattagtagtattaacatttgtttcactcttccaagagacaaaagc  
aaaactaaagaccttcaacttcaaggctcaggatataatgtaataatggtttgtcttctggtgcattttgccaccattggt  
tcaaaaataccattgctgtatgatcagcctcctcagattctatttggcagactctacggcggatattcgcttttagaa  
aaaaaacaatttggcgaactttttttttttgtaaatattgtagattccacacacaagactgtctaagattctttg  
ataagacacgcacaatgcgatttaagatttttcaaagaaatgaggttcggtgattgttccactagggtttggtatatt  
ataatttgaattttttttt[tt;t]aaagatatttataagaaaacgaaggagtggtcgcgtaagtggtactaat  
agtcgatgacactagtgatacgcgatactggaaa[g;a]ggacatcaatattcattagtaagccatcttagcaaaaa  
cgttgttatcagataagaaaagttctcagactgacgtggctgtcaatctccacaacgtgttatctccatttgggta  
gttacggacaaaagacgttgaagagacaacaatatggtctaaaagattgacatggaaagaaaattgtttatccgacaaa  
gacctcttgggtccaacgtggctttcacatcactagtttactatttcacatctcatggaaaattactgaaatagtagt  
tgtctgtattttgttttttctgcaagattttgtttgtatacttttaggtaattgctgcccgaagaaacattgctaaatt  
gatatttataccaacttacaatagtttacagttcaaaaatagaatctccattttgaagatacaccactaattttctt  
catttattcccccaagagaacgagaaaagaac[a;t]atagtcggtgatttcgtaaaaatctagtttcagaaaag  
acacgtctagatctgtctgtatcagggcagatagacacaagtgacgaagcaaaagaaaacaaaaataagataagaact  
cttaccactaaaagataaaaaataagaaaaaaaataaaaacaattcaacgatttgcgaagataaaaagcagacactgtac  
ataagctccgcattcacttacgtgttggatacttaatttgacactcttctttgtgttttctcttccaccttctttttc  
ggtatatcattcaacaaaattctctcttctcatttctttattttgttgttttttttattattatgaaatcaagagaatt  
aaaacagaggctctgcaaaaagaagATGATCAAAACAATCACATCTCTACGCAAACTCTGGTTCTACCTCTTCATTTA  
CATATTCGTACGgtataaactggattcttacaatctaataatgatgattacttacttagagacataaactcggatctcagat  
acaaaatgttttatggtctgtttttttgtcctgatgaaatagCTACAACTTTTCGCCAAGTACAACGCACAAGCTG  
CATCGGCTTTGCGAGAAGAGCGTAAGAACTCTTTATCagtaagttctctttttcatgatccagccagggtcatatag  
atattttgttaccattggaaaaagctctgtttcaaatttggttgtaattgtatcatatagAAATGGAGATGATGTATAT  
GCGGATTTGGATTGGGATAATCTCGGGTTTGGTCTAAATCCAGCTGATTACATGTATGTATGCAATGCTCAAAAGAC  
GGCAATTCACCAAGGAGAACTTAGTCCCTATGGGAATATTCAGTCAAGTCTTCTGCTGGAGTCTTAACTATGGA  
CAGgcaaggatctcgtaaccccccaaatgtttctgtatttggtttctcaactgtatgatcaatagaggttttgggattct  
ttgcagCGATATACGAAGGTACAAAAGCATAACAGGAAAAGAAAATGGGAAGCTTCTTTGTTCGTCCGGATCACAAAC  
GCTATCCGGATGAAGCTTGGCGCTGAACGGATGCTCATGCC'TTCTC'TTTCGGTTGATCAGTTTGTAAATGCAGTTAAA  
CAAACCGCTCTTGCAAAACAACGTTGGgtaaaaaacgctttcttctgtgacgtatatttcttctgaagaggtttgtttt[  
;a]gggatctgat[a;g]agtgatgatgtgtttgttcagGTTCTCTGCAGGGAAAGGGACTTTGTACATTAGGCCT  
TTGTTGATGGGAAGTGGTCCAATACTTGGTTTAGGTCCTGCACCTGAATATACATTCATTGTCTATGCATCTCCAGTT  
GGTAACTACTTCAAGgtatatacaataactcttgcagtgccatgcttttggcgtggaacgattagcaaatgttttgt  
tcaactgatttgtagGAAGGGATGGCTGCTCTAACCTCTATGTTGAGGAAGAATATGTCCGAGCGGCTCTGGTGGAG  
CTGGAGGCGTCAAGAGCATCACAAATTATGCGCCAgtaagtggtgaaaccaacttagtttctcaaagaccagagtcag  
aaaaagagttttgataaaccacgtgtttgtagGTTTTGAAAGCACTGAGCAGAGCCAAGAGTCGGGGGTTTTTCAGACG  
TTCTTTATCTCGACTCTGTCAAGAAGAAGTACTTAGAGGAGGCTTCTTCTTGCAACGCTCTTTGTTGTCAAGgtaagat  
atattgtggtgtctccatgtctctttgttgcacctaattgtatcattgattcagGGTCGGACAATCTCAACTCCTGC  
AACTAATGGAACAATTTTGAAGGGATTACGCGAAAAGTGTGATGGAGATCGCAAGTGTATCAAGTTATCAGgtaaac  
acagataagattga[a;t]tcactctaaacaccccccaaaactaaactcagctaagttcacacctgagttatgatcagG  
TAGTAGAGAAGGCAGTTCATGTGGATGAAGTAATGGATGCAGATGAAGT'TTTTTCACCAGGAACTGCTGTAGTAGTTG  
CTCCCGTGGGCACTATCACATATCAGGA[A;C]AAAAGgtaaatctcaatgcctgaatcaagtttactcaagcctta  
agcaaaagaaatggactgatgtaatctttctgaaacattcagAGTAGAGTATAAAACCGGGATGAATCTGTCTGCCAG  
AACTGCGTTCAGTCTCTGATAGGTATCCAGACAGGATTGATTGAAGATAACAAGGGATGGGTACAGATATCAACTGA  
agaataacaatcttcaatattttgcccacaaaggagattactctgcattttaagctgtgtatacacgacaatgaagaac  
actataaacatataatgagatagaaacagaaagctcttttgcctcatttctatcgtaaagtcaatgtctttcacaa  
aactatgacaaaagaaaagaatcgtctattgtacttgtagacaagtgtttccaaggatagtttcatcttctctgcagt  
aactccaaaattacatttctattttaggaggcaaaactgtatatacgttttcaatggctttccccacttcttactttcat  
caccataaagggtttcaactactaaaattgtaactcaactgcaaaaacacctttcatctgcagagttataaagtata  
cattgtaactcaagat

> AT4G02640 (bZIP10) | Col-0 (TAIR10) vs. C24 (contig\_chr4L\_77)

attcttttgggttcggttctctattgtaatatagcctacatagtggtgatttgggtatttgggtgacactatggttaaggtc  
aaaaaagaatagagagtaaaattccatatatatgaaaattgaaaatgactgtttaaattacatatggcgcgaaaaaat  
gatctagttcgttaattatcttttagaagctttttgt[**g,agattatt**]gtaaatttagattttt[**a,t**]aaaaactcc  
atat[**at,tg**]tttttttt[**a,t**]taatttaggcttgtctattgtaaatttgaatatagcttagtgatttatttgt  
ttagcttctgggtgacattttataaaattttaatgaccagtataatatagtttt[**t,g**]ttataaatta[**a,g**]aat  
ataatctaagtgtttatgtcaacttcggttgcattgaataaatcaaactttgaagaataatataaataacaatgtttg  
caaaaactgttacgttttttcatgtaaacatttagtgagcgttatacaatagatatttaaattataaaaactattcaaa  
gaatattgtaagaataaaaacagaaatgtgtaagaaaaaatgtttatctttatgtacgtaaaaaaaagagaatat  
acttgtgtgggtggacctaagtcaaataggcaagtaccgacaaaaaagaagaatcagaaagtgaaaaagagagcg  
agcgATGAACAGTATCTTCTCCATTGACGATTTCTCCGATCCTTCTGGGAAACTCCTCCGATTCTCTCAATCC[**C,**  
**T**]GACTCTTCTAAGCCTGTTACGGCGGATGAAGTTAGCCAGAGTCAACCGGAATGGACTTTCGAGATGTTTCTCGAAG  
AGATTTCTTCGTCGGCGGTGAGCTCTGAGCCACTTGGTAACAACAACAACGCGATCGTCGGTGTTCCTTCGGCGCAAT  
CTCTTCTTCTGTTTCCGGACAGAATGATTTTCGAGGATGATAGTCGATTTCTGTGATCGCGATTCGGGAAATTTGGATT  
GTGCTGTCTCCATGACGACGAAGACGGTGATTGTTGATTCCGATGATTATCGTCGTGTTCTTAAGAACAAGCTTGAGA  
CTGAGTGCCTACTGTTGTTTCTTCTTCGGgtgtgttgaatcttctatttttcttctatatatgtgtaatttgtgcg  
ttttgatctaaatctgaagctctgatgttctctcttagGTTGGGTCTGTGAAGCCTGAAGATTGACTAGTTCTCCA  
GAACTCAACTTCAACCAGTTCAATCCAGTCTCTTACTCAAGgtaagag[**t,c**]ctcttcttagtttcaccaggata  
gatgagcgatgataaacctgcagattcgtttctctgttctgtgtttgttaatttagatgcctagggttaaggaattaga  
aatagaaaaatggtaacttttgttggatcaagcgcctagttttatccgtcaagttcaatcttttgtgactgactttct  
cattgaaattaaactgctttctggaagaacaataagcttgggattgagatgagttctggtggttagttcaatatatgg  
gaaatcattatctcagcgcctcgtctttctcttcagatatctctctgagtccttagacatagtaagtttaatcgtgg  
tagGTTCTTTGATGACCCCAGGAGAACTTGGTGTACTTCTTCTTACCAGCTGAGGTGAAAAAACTGGTGTATCAA  
TGAAGCAGGTTACTAGTGGATCGTCGAGAGAATATTCTGATGACGAGGACCTTGATGAAGAGAATGAAACCACCGGTT  
CCTTGAAGCCAGAGGACGTTAAAAAATCTAGAAGgtaatcattactttttctccaatttctgtcgtttgaagattac  
atztatagagccttgttcttcttttaaatattttagtagGATGCTGTCAAATCGTGAGTCAGCTAGGCGATCTAGAAGGA  
GAAAGCAGGAGCAAACAAGTGACCTCGAAACACAGgttttgtgtgtatcctctcaacacctcatttttgtgttgaag  
gatattaatgagacctaatgttattttgatagGTTAATGATCTAAAAGGTGAGCATTATCACTTCTTAAACAACCTG  
AGCAACATGAATCACAAGTATGACGAGGCTGCTGTTGGCAATAGAATACTAAAGGCTGACATTGAGACATTAAGAGCT  
AAGgtaagaagacttaagtattatcctcctcctctcttttttctgaactacccttttttgtatacagtttttagtaactcc  
catgttatgttaagGTGAAAATGGCGGAAGAAACCGTGAAGAGAGTAACAGGAATGAATCCGATGCTTCTCGGAAGAT  
CAAGTGGACATAACAACAACAACAGAATGCCAATAACTGGTAACAACAGGATGGATTCTTCTAGCATTATTCCAGCTT  
ATCAACCACACTCAAACCTAAACCA[**T,C**]ATGTCAAACCAAACATCGGGATCCCAACCATTCTACCTCCAAGACTC  
GGAACAATTTTCGCTGCTCCTCCATCCCAAACAGCTCTCCCTTGCAGAGAATTAGAAATGGGCAAAAATCACCATGTT  
ACTCCAAGCGCCAACCCGTATGGCTGGAATACCGAACCTCAGAACGATTTCAGCATGgttaagctaaaaacatggctcttt  
cttttaagaccattgaacaatttaaaaccatttgaagtaactatgatccctgtttatacatatcagattcctgtctccc  
cttttttgtctcattttacagGCCGAAAAAATGCGTGGACTGAtcaacaagaagcgggtttcgcactatattaatgt  
ctatgcatctgtaatttgaagtgttattaagttacgaatcatgagaaaacatcttgtgaaaatacagtctcatggct  
[**ta,**]tatatatataaagctctgtctttataacattacaagattctttatttgagaatcgtctttctattttagctaa  
taacagagtgtatctgtttttatccaattttaaaaaagata[**g,t**]ctcacatggcttactaatttcccctatca  
ttaaattccgacaacctcggcgatttccatggtagatcgatcaagcattcacattttctcgtcagaaaaacac[**a,**]aa  
aaaaaaaaaacagaggagaaaaagagacgacgacaacaagtgaagaaaaaagtctcgtcttctccaattttttctc  
ctctctcttctctgtttaacggcgtagtaagtcaaa

Legend:

START to STOP codon in grey

Exons in capital letters

UTRs in italic

Polymorphism in square brackets and red: [Col-0;C24]
